# Supplementary material for: Identification and Validation of N6-Methyladenosine-Related Biomarkers for Bladder Cancer: Implications for Immunotherapy
Source: Front Oncol. 2022 Mar 2;12:820242. doi: 10.3389/fonc.2022.820242 (PMC8924666; doi:10.3389/fonc.2022.820242)
Supplement: Supplementary Table 1 — Pearson correlation of 23 m6A regulatory factors [file Table_1.xlsx]

## Sheet: Table S1. 
Table S1. Pearson correlation of 23 m6A regulatory factors
	ALKBH5	FMR1	FTO	HNRNPA2B1	HNRNPC	IGF2BP1	IGF2BP2	IGF2BP3	KIAA1429	METTL14	METTL3	RBM15	RBM15B	WTAP	YTHDC1	YTHDC2	YTHDF1	YTHDF2	YTHDF3	ZC3H13	CBLL1	ELAVL1	LRPPRC
ALKBH5	1	0.00949295	0.189711	0.101904	0.159273	0.0279018	0.211623	0.0400066	0.0775538	0.124522	0.00397144	0.134696	0.0204078	0.0732071	-0.118745	-0.0476264	-0.0808995	0.0216959	-0.0956203	-0.00691322	0.0666512	0.154466	0.0967179
FMR1	0.00949295	1	0.0278769	0.281951	-0.01649	-0.0832	-0.00976486	0.0467232	0.051614	0.294256	0.0602705	0.0239448	0.0526329	0.140568	0.241953	0.224315	0.0465754	0.122903	0.197593	0.224113	0.205674	0.0837946	0.0515668
FTO	0.189711	0.0278769	1	0.0618909	0.113614	0.0470285	0.0830037	0.0142716	0.143967	0.256138	-0.119569	-0.0936188	-0.0917073	0.192615	0.0410682	0.17097	-0.0591776	-0.0431923	0.193028	0.351544	0.125845	0.0748102	0.131643
HNRNPA2B1	0.101904	0.281951	0.0618909	1	0.517636	0.0758518	0.150365	0.137873	0.223216	0.278236	0.202116	0.194462	0.0990354	0.313439	0.216224	0.202478	0.0296956	0.234529	0.137563	0.128686	0.311469	0.431493	0.318738
HNRNPC	0.159273	-0.01649	0.113614	0.517636	1	0.142094	0.184792	0.0671241	0.163805	0.1258	0.161038	0.208077	-0.0519902	0.309157	0.0634504	0.037808	-0.0512595	0.209166	0.0759637	0.0223651	0.0868013	0.416107	0.380922
IGF2BP1	0.0279018	-0.0832	0.0470285	0.0758518	0.142094	1	0.399631	0.455209	0.16263	-0.00597842	-0.0726409	0.212342	-0.00102708	0.0810293	-0.0681278	-0.0714795	0.13453	-0.065481	0.130138	0.075701	0.0911576	0.032054	0.122839
IGF2BP2	0.211623	-0.00976486	0.0830037	0.150365	0.184792	0.399631	1	0.51242	0.17496	0.109053	-0.323009	0.240799	-0.184294	0.176949	-0.383013	-0.204704	-0.132877	-0.247451	-0.0364856	-0.0353967	0.00862589	-0.193346	0.0972125
IGF2BP3	0.0400066	0.0467232	0.0142716	0.137873	0.0671241	0.455209	0.51242	1	0.0587648	0.0885902	-0.20198	0.163582	-0.047722	0.115746	-0.19987	-0.180302	0.0591567	-0.179956	-0.0444076	0.0451634	0.11102	-0.114253	0.114454
KIAA1429	0.0775538	0.051614	0.143967	0.223216	0.163805	0.16263	0.17496	0.0587648	1	0.386313	0.0885894	0.301436	0.0867422	0.0661136	0.171848	0.192873	0.073147	0.114399	0.597783	0.253566	0.413915	0.138353	0.396116
METTL14	0.124522	0.294256	0.256138	0.278236	0.1258	-0.00597842	0.109053	0.0885902	0.386313	1	-0.00754339	0.237382	0.190953	0.309762	0.401	0.361886	0.036567	0.266993	0.454867	0.462125	0.491595	0.0337059	0.271489
METTL3	0.00397144	0.0602705	-0.119569	0.202116	0.161038	-0.0726409	-0.323009	-0.20198	0.0885894	-0.00754339	1	-0.0231019	0.145923	0.0684404	0.31716	0.227092	0.0804206	0.206179	0.104413	0.0689288	0.0441064	0.225565	0.0650471
RBM15	0.134696	0.0239448	-0.0936188	0.194462	0.208077	0.212342	0.240799	0.163582	0.301436	0.237382	-0.0231019	1	0.0214701	0.253769	0.0146606	-0.00893214	0.0924411	0.251561	0.107135	-0.101735	0.278488	0.0718541	0.260032
RBM15B	0.0204078	0.0526329	-0.0917073	0.0990354	-0.0519902	-0.00102708	-0.184294	-0.047722	0.0867422	0.190953	0.145923	0.0214701	1	-0.021001	0.176975	0.0224719	0.0913714	0.247679	0.07917	0.133651	0.228948	0.177718	0.0283839
WTAP	0.0732071	0.140568	0.192615	0.313439	0.309157	0.0810293	0.176949	0.115746	0.0661136	0.309762	0.0684404	0.253769	-0.021001	1	0.108507	0.214785	-0.0185973	0.185303	0.133474	0.116823	0.1352	0.0611737	0.0644066
YTHDC1	-0.118745	0.241953	0.0410682	0.216224	0.0634504	-0.0681278	-0.383013	-0.19987	0.171848	0.401	0.31716	0.0146606	0.176975	0.108507	1	0.440229	0.173517	0.438686	0.380017	0.410272	0.314232	0.257521	0.114395
YTHDC2	-0.0476264	0.224315	0.17097	0.202478	0.037808	-0.0714795	-0.204704	-0.180302	0.192873	0.361886	0.227092	-0.00893214	0.0224719	0.214785	0.440229	1	0.0504419	0.13089	0.4126	0.36464	0.250451	0.0979157	0.163486
YTHDF1	-0.0808995	0.0465754	-0.0591776	0.0296956	-0.0512595	0.13453	-0.132877	0.0591567	0.073147	0.036567	0.0804206	0.0924411	0.0913714	-0.0185973	0.173517	0.0504419	1	0.238652	0.151092	0.0606674	0.183908	0.0909932	0.13979
YTHDF2	0.0216959	0.122903	-0.0431923	0.234529	0.209166	-0.065481	-0.247451	-0.179956	0.114399	0.266993	0.206179	0.251561	0.247679	0.185303	0.438686	0.13089	0.238652	1	0.123834	0.163389	0.269258	0.311451	0.12631
YTHDF3	-0.0956203	0.197593	0.193028	0.137563	0.0759637	0.130138	-0.0364856	-0.0444076	0.597783	0.454867	0.104413	0.107135	0.07917	0.133474	0.380017	0.4126	0.151092	0.123834	1	0.45981	0.441692	0.0923337	0.298105
ZC3H13	-0.00691322	0.224113	0.351544	0.128686	0.0223651	0.075701	-0.0353967	0.0451634	0.253566	0.462125	0.0689288	-0.101735	0.133651	0.116823	0.410272	0.36464	0.0606674	0.163389	0.45981	1	0.384421	0.0259944	0.219505
CBLL1	0.0666512	0.205674	0.125845	0.311469	0.0868013	0.0911576	0.00862589	0.11102	0.413915	0.491595	0.0441064	0.278488	0.228948	0.1352	0.314232	0.250451	0.183908	0.269258	0.441692	0.384421	1	0.162213	0.421325
ELAVL1	0.154466	0.0837946	0.0748102	0.431493	0.416107	0.032054	-0.193346	-0.114253	0.138353	0.0337059	0.225565	0.0718541	0.177718	0.0611737	0.257521	0.0979157	0.0909932	0.311451	0.0923337	0.0259944	0.162213	1	0.179408
LRPPRC	0.0967179	0.0515668	0.131643	0.318738	0.380922	0.122839	0.0972125	0.114454	0.396116	0.271489	0.0650471	0.260032	0.0283839	0.0644066	0.114395	0.163486	0.13979	0.12631	0.298105	0.219505	0.421325	0.179408	1

## Sheet: Table S2.
Table S2. Immune cell marker genes
Metagene	Cell type	Immunity
ADAM28	Activated B cell	Adaptive
CD180	Activated B cell	Adaptive
CD79B	Activated B cell	Adaptive
BLK	Activated B cell	Adaptive
CD19	Activated B cell	Adaptive
MS4A1	Activated B cell	Adaptive
TNFRSF17	Activated B cell	Adaptive
IGHM	Activated B cell	Adaptive
GNG7	Activated B cell	Adaptive
MICAL3	Activated B cell	Adaptive
SPIB	Activated B cell	Adaptive
HLA-DOB	Activated B cell	Adaptive
IGKC	Activated B cell	Adaptive
PNOC	Activated B cell	Adaptive
FCRL2	Activated B cell	Adaptive
BACH2	Activated B cell	Adaptive
CR2	Activated B cell	Adaptive
TCL1A	Activated B cell	Adaptive
AKNA	Activated B cell	Adaptive
ARHGAP25	Activated B cell	Adaptive
CCL21	Activated B cell	Adaptive
CD27	Activated B cell	Adaptive
CD38	Activated B cell	Adaptive
CLEC17A	Activated B cell	Adaptive
CLEC9A	Activated B cell	Adaptive
CLECL1	Activated B cell	Adaptive
AIM2	Activated CD4 T cell	Adaptive
BIRC3	Activated CD4 T cell	Adaptive
BRIP1	Activated CD4 T cell	Adaptive
CCL20	Activated CD4 T cell	Adaptive
CCL4	Activated CD4 T cell	Adaptive
CCL5	Activated CD4 T cell	Adaptive
CCNB1	Activated CD4 T cell	Adaptive
CCR7	Activated CD4 T cell	Adaptive
DUSP2	Activated CD4 T cell	Adaptive
ESCO2	Activated CD4 T cell	Adaptive
ETS1	Activated CD4 T cell	Adaptive
EXO1	Activated CD4 T cell	Adaptive
EXOC6	Activated CD4 T cell	Adaptive
IARS	Activated CD4 T cell	Adaptive
ITK	Activated CD4 T cell	Adaptive
KIF11	Activated CD4 T cell	Adaptive
KNTC1	Activated CD4 T cell	Adaptive
NUF2	Activated CD4 T cell	Adaptive
PRC1	Activated CD4 T cell	Adaptive
PSAT1	Activated CD4 T cell	Adaptive
RGS1	Activated CD4 T cell	Adaptive
RTKN2	Activated CD4 T cell	Adaptive
SAMSN1	Activated CD4 T cell	Adaptive
SELL	Activated CD4 T cell	Adaptive
TRAT1	Activated CD4 T cell	Adaptive
ADRM1	Activated CD8 T cell	Adaptive
AHSA1	Activated CD8 T cell	Adaptive
C1GALT1C1	Activated CD8 T cell	Adaptive
CCT6B	Activated CD8 T cell	Adaptive
CD37	Activated CD8 T cell	Adaptive
CD3D	Activated CD8 T cell	Adaptive
CD3E	Activated CD8 T cell	Adaptive
CD3G	Activated CD8 T cell	Adaptive
CD69	Activated CD8 T cell	Adaptive
CD8A	Activated CD8 T cell	Adaptive
CETN3	Activated CD8 T cell	Adaptive
CSE1L	Activated CD8 T cell	Adaptive
GEMIN6	Activated CD8 T cell	Adaptive
GNLY	Activated CD8 T cell	Adaptive
GPT2	Activated CD8 T cell	Adaptive
GZMA	Activated CD8 T cell	Adaptive
GZMH	Activated CD8 T cell	Adaptive
GZMK	Activated CD8 T cell	Adaptive
IL2RB	Activated CD8 T cell	Adaptive
LCK	Activated CD8 T cell	Adaptive
MPZL1	Activated CD8 T cell	Adaptive
NKG7	Activated CD8 T cell	Adaptive
PIK3IP1	Activated CD8 T cell	Adaptive
PTRH2	Activated CD8 T cell	Adaptive
TIMM13	Activated CD8 T cell	Adaptive
ZAP70	Activated CD8 T cell	Adaptive
ABHD3	Central memory CD4 T cell	Adaptive
AHNAK	Central memory CD4 T cell	Adaptive
ANXA2P2	Central memory CD4 T cell	Adaptive
AQP3	Central memory CD4 T cell	Adaptive
ATHL1	Central memory CD4 T cell	Adaptive
BMI1	Central memory CD4 T cell	Adaptive
BZW2	Central memory CD4 T cell	Adaptive
CD63	Central memory CD4 T cell	Adaptive
COL4A1	Central memory CD4 T cell	Adaptive
CYLD	Central memory CD4 T cell	Adaptive
ELMO2	Central memory CD4 T cell	Adaptive
FYN	Central memory CD4 T cell	Adaptive
GLIPR1	Central memory CD4 T cell	Adaptive
GSS	Central memory CD4 T cell	Adaptive
IFITM2	Central memory CD4 T cell	Adaptive
ITGB1	Central memory CD4 T cell	Adaptive
ITGB2	Central memory CD4 T cell	Adaptive
KLF5	Central memory CD4 T cell	Adaptive
LSP1	Central memory CD4 T cell	Adaptive
NDUFB9	Central memory CD4 T cell	Adaptive
PKM2	Central memory CD4 T cell	Adaptive
SFXN3	Central memory CD4 T cell	Adaptive
SIRPG	Central memory CD4 T cell	Adaptive
SMAD4	Central memory CD4 T cell	Adaptive
STX4	Central memory CD4 T cell	Adaptive
TRADD	Central memory CD4 T cell	Adaptive
VIM	Central memory CD4 T cell	Adaptive
XRCC6	Central memory CD4 T cell	Adaptive
ACTN4	Central memory CD8 T cell	Adaptive
ADAM12	Central memory CD8 T cell	Adaptive
ADCY9	Central memory CD8 T cell	Adaptive
F13A1	Central memory CD8 T cell	Adaptive
FCER1G	Central memory CD8 T cell	Adaptive
FCGR3B	Central memory CD8 T cell	Adaptive
FGF7	Central memory CD8 T cell	Adaptive
FKBP4	Central memory CD8 T cell	Adaptive
GLUD1	Central memory CD8 T cell	Adaptive
GM2A	Central memory CD8 T cell	Adaptive
GUSB	Central memory CD8 T cell	Adaptive
IL1RN	Central memory CD8 T cell	Adaptive
NOL11	Central memory CD8 T cell	Adaptive
NTRK1	Central memory CD8 T cell	Adaptive
RARA	Central memory CD8 T cell	Adaptive
RNF128	Central memory CD8 T cell	Adaptive
SIGLEC1	Central memory CD8 T cell	Adaptive
TNFRSF11A	Central memory CD8 T cell	Adaptive
TOX4	Central memory CD8 T cell	Adaptive
UBA52	Central memory CD8 T cell	Adaptive
ULBP1	Central memory CD8 T cell	Adaptive
ATM	Effector memeory CD4 T cell	Adaptive
CASP3	Effector memeory CD4 T cell	Adaptive
CASQ1	Effector memeory CD4 T cell	Adaptive
CD300E	Effector memeory CD4 T cell	Adaptive
DARS	Effector memeory CD4 T cell	Adaptive
DOCK9	Effector memeory CD4 T cell	Adaptive
EXOSC9	Effector memeory CD4 T cell	Adaptive
EZH2	Effector memeory CD4 T cell	Adaptive
GDE1	Effector memeory CD4 T cell	Adaptive
IL34	Effector memeory CD4 T cell	Adaptive
NCOA4	Effector memeory CD4 T cell	Adaptive
NEFL	Effector memeory CD4 T cell	Adaptive
PDGFRL	Effector memeory CD4 T cell	Adaptive
PTGS1	Effector memeory CD4 T cell	Adaptive
REPS1	Effector memeory CD4 T cell	Adaptive
SCG2	Effector memeory CD4 T cell	Adaptive
SDPR	Effector memeory CD4 T cell	Adaptive
SIGLEC14	Effector memeory CD4 T cell	Adaptive
SIGLEC6	Effector memeory CD4 T cell	Adaptive
TAL1	Effector memeory CD4 T cell	Adaptive
TFEC	Effector memeory CD4 T cell	Adaptive
TIPIN	Effector memeory CD4 T cell	Adaptive
TPK1	Effector memeory CD4 T cell	Adaptive
UQCRB	Effector memeory CD4 T cell	Adaptive
USP9Y	Effector memeory CD4 T cell	Adaptive
WIPF1	Effector memeory CD4 T cell	Adaptive
ZCRB1	Effector memeory CD4 T cell	Adaptive
ACAP1	Effector memeory CD8 T cell	Adaptive
APOL3	Effector memeory CD8 T cell	Adaptive
ARHGAP10	Effector memeory CD8 T cell	Adaptive
ATP10D	Effector memeory CD8 T cell	Adaptive
C3AR1	Effector memeory CD8 T cell	Adaptive
CCR5	Effector memeory CD8 T cell	Adaptive
CD160	Effector memeory CD8 T cell	Adaptive
CD55	Effector memeory CD8 T cell	Adaptive
CFLAR	Effector memeory CD8 T cell	Adaptive
CMKLR1	Effector memeory CD8 T cell	Adaptive
DAPP1	Effector memeory CD8 T cell	Adaptive
FCRL6	Effector memeory CD8 T cell	Adaptive
FLT3LG	Effector memeory CD8 T cell	Adaptive
GZMM	Effector memeory CD8 T cell	Adaptive
HAPLN3	Effector memeory CD8 T cell	Adaptive
HLA-DMB	Effector memeory CD8 T cell	Adaptive
HLA-DPA1	Effector memeory CD8 T cell	Adaptive
HLA-DPB1	Effector memeory CD8 T cell	Adaptive
IFI16	Effector memeory CD8 T cell	Adaptive
LIME1	Effector memeory CD8 T cell	Adaptive
LTK	Effector memeory CD8 T cell	Adaptive
NFKBIA	Effector memeory CD8 T cell	Adaptive
SETD7	Effector memeory CD8 T cell	Adaptive
SIK1	Effector memeory CD8 T cell	Adaptive
TRIB2	Effector memeory CD8 T cell	Adaptive
ACP5	Gamma delta T cell	Adaptive
AQP9	Gamma delta T cell	Adaptive
BTN3A2	Gamma delta T cell	Adaptive
C1orf54	Gamma delta T cell	Adaptive
CARD8	Gamma delta T cell	Adaptive
CCL18	Gamma delta T cell	Adaptive
CD209	Gamma delta T cell	Adaptive
CD33	Gamma delta T cell	Adaptive
CD36	Gamma delta T cell	Adaptive
CDK5	Gamma delta T cell	Adaptive
IL10RB	Gamma delta T cell	Adaptive
KLRF1	Gamma delta T cell	Adaptive
LGALS1	Gamma delta T cell	Adaptive
MAPK7	Gamma delta T cell	Adaptive
KLHL7	Gamma delta T cell	Adaptive
KRT80	Gamma delta T cell	Adaptive
LAMC1	Gamma delta T cell	Adaptive
LCORL	Gamma delta T cell	Adaptive
LMNB1	Gamma delta T cell	Adaptive
MEIS3P1	Gamma delta T cell	Adaptive
MPL	Gamma delta T cell	Adaptive
FABP1	Gamma delta T cell	Adaptive
FABP5	Gamma delta T cell	Adaptive
FADD	Gamma delta T cell	Adaptive
MFAP3L	Gamma delta T cell	Adaptive
MINPP1	Gamma delta T cell	Adaptive
RPS24	Gamma delta T cell	Adaptive
RPS7	Gamma delta T cell	Adaptive
RPS9	Gamma delta T cell	Adaptive
DBNL	Gamma delta T cell	Adaptive
CCL13	Gamma delta T cell	Adaptive
CD22	Immature B cell	Adaptive
CYBB	Immature B cell	Adaptive
FAM129C	Immature B cell	Adaptive
FCRL1	Immature B cell	Adaptive
FCRL3	Immature B cell	Adaptive
FCRL5	Immature B cell	Adaptive
FCRLA	Immature B cell	Adaptive
HDAC9	Immature B cell	Adaptive
HLA-DQA1	Immature B cell	Adaptive
HVCN1	Immature B cell	Adaptive
KIAA0226	Immature B cell	Adaptive
NCF1	Immature B cell	Adaptive
NCF1B	Immature B cell	Adaptive
P2RY10	Immature B cell	Adaptive
SP100	Immature B cell	Adaptive
TXNIP	Immature B cell	Adaptive
STAP1	Immature B cell	Adaptive
TAGAP	Immature B cell	Adaptive
ZCCHC2	Immature B cell	Adaptive
AICDA	Memory B cell	Adaptive
CCNA2	Memory B cell	Adaptive
CDKN3	Memory B cell	Adaptive
CLCN5	Memory B cell	Adaptive
ENPP1	Memory B cell	Adaptive
FCER1A	Memory B cell	Adaptive
FCRL4	Memory B cell	Adaptive
MYC	Memory B cell	Adaptive
RUNX2	Memory B cell	Adaptive
SORL1	Memory B cell	Adaptive
SOX5	Memory B cell	Adaptive
STAT5A	Memory B cell	Adaptive
STAT5B	Memory B cell	Adaptive
TLR9	Memory B cell	Adaptive
CCL3L1	Regulatory T cell	Adaptive
CD72	Regulatory T cell	Adaptive
CLEC5A	Regulatory T cell	Adaptive
FOXP3	Regulatory T cell	Adaptive
ITGA4	Regulatory T cell	Adaptive
L1CAM	Regulatory T cell	Adaptive
LIPA	Regulatory T cell	Adaptive
LRP1	Regulatory T cell	Adaptive
LRRC42	Regulatory T cell	Adaptive
MARCO	Regulatory T cell	Adaptive
MMP12	Regulatory T cell	Adaptive
MNDA	Regulatory T cell	Adaptive
MRC1	Regulatory T cell	Adaptive
MS4A6A	Regulatory T cell	Adaptive
PELO	Regulatory T cell	Adaptive
PLEK	Regulatory T cell	Adaptive
PRSS23	Regulatory T cell	Adaptive
PTGIR	Regulatory T cell	Adaptive
ST8SIA4	Regulatory T cell	Adaptive
STAB1	Regulatory T cell	Adaptive
B3GAT1	T follicular helper cell	Adaptive
CDK5R1	T follicular helper cell	Adaptive
PDCD1	T follicular helper cell	Adaptive
BCL6	T follicular helper cell	Adaptive
CD200	T follicular helper cell	Adaptive
CD83	T follicular helper cell	Adaptive
CD84	T follicular helper cell	Adaptive
FGF2	T follicular helper cell	Adaptive
GPR18	T follicular helper cell	Adaptive
CEBPA	T follicular helper cell	Adaptive
CECR1	T follicular helper cell	Adaptive
CLEC10A	T follicular helper cell	Adaptive
CLEC4A	T follicular helper cell	Adaptive
CSF1R	T follicular helper cell	Adaptive
CTSS	T follicular helper cell	Adaptive
DMN	T follicular helper cell	Adaptive
DPP4	T follicular helper cell	Adaptive
LRRC32	T follicular helper cell	Adaptive
MC5R	T follicular helper cell	Adaptive
MICA	T follicular helper cell	Adaptive
NCAM1	T follicular helper cell	Adaptive
NCR2	T follicular helper cell	Adaptive
NRP1	T follicular helper cell	Adaptive
PDCD1LG2	T follicular helper cell	Adaptive
PDCD6	T follicular helper cell	Adaptive
PRDX1	T follicular helper cell	Adaptive
RAE1	T follicular helper cell	Adaptive
RAET1E	T follicular helper cell	Adaptive
SIGLEC7	T follicular helper cell	Adaptive
SIGLEC9	T follicular helper cell	Adaptive
TYRO3	T follicular helper cell	Adaptive
CHST12	T follicular helper cell	Adaptive
CLIC3	T follicular helper cell	Adaptive
IVNS1ABP	T follicular helper cell	Adaptive
KIR2DL2	T follicular helper cell	Adaptive
LGMN	T follicular helper cell	Adaptive
CD70	Type 1 T helper cell	Adaptive
TBX21	Type 1 T helper cell	Adaptive
ADAM8	Type 1 T helper cell	Adaptive
AHCYL2	Type 1 T helper cell	Adaptive
ALCAM	Type 1 T helper cell	Adaptive
B3GALNT1	Type 1 T helper cell	Adaptive
BBS12	Type 1 T helper cell	Adaptive
BST1	Type 1 T helper cell	Adaptive
CD151	Type 1 T helper cell	Adaptive
CD47	Type 1 T helper cell	Adaptive
CD48	Type 1 T helper cell	Adaptive
CD52	Type 1 T helper cell	Adaptive
CD53	Type 1 T helper cell	Adaptive
CD59	Type 1 T helper cell	Adaptive
CD6	Type 1 T helper cell	Adaptive
CD68	Type 1 T helper cell	Adaptive
CD7	Type 1 T helper cell	Adaptive
CD96	Type 1 T helper cell	Adaptive
CFHR3	Type 1 T helper cell	Adaptive
CHRM3	Type 1 T helper cell	Adaptive
CLEC7A	Type 1 T helper cell	Adaptive
COL23A1	Type 1 T helper cell	Adaptive
COL4A4	Type 1 T helper cell	Adaptive
COL5A3	Type 1 T helper cell	Adaptive
DAB1	Type 1 T helper cell	Adaptive
DLEU7	Type 1 T helper cell	Adaptive
DOC2B	Type 1 T helper cell	Adaptive
EMP1	Type 1 T helper cell	Adaptive
F12	Type 1 T helper cell	Adaptive
FURIN	Type 1 T helper cell	Adaptive
GAB3	Type 1 T helper cell	Adaptive
GATM	Type 1 T helper cell	Adaptive
GFPT2	Type 1 T helper cell	Adaptive
GPR25	Type 1 T helper cell	Adaptive
GREM2	Type 1 T helper cell	Adaptive
HAVCR1	Type 1 T helper cell	Adaptive
HSD11B1	Type 1 T helper cell	Adaptive
HUNK	Type 1 T helper cell	Adaptive
IGF2	Type 1 T helper cell	Adaptive
RCSD1	Type 1 T helper cell	Adaptive
RYR1	Type 1 T helper cell	Adaptive
SAV1	Type 1 T helper cell	Adaptive
SELE	Type 1 T helper cell	Adaptive
SELP	Type 1 T helper cell	Adaptive
SH3KBP1	Type 1 T helper cell	Adaptive
SIT1	Type 1 T helper cell	Adaptive
SLC35B3	Type 1 T helper cell	Adaptive
SIGLEC10	Type 1 T helper cell	Adaptive
SKAP1	Type 1 T helper cell	Adaptive
THUMPD2	Type 1 T helper cell	Adaptive
TIGIT	Type 1 T helper cell	Adaptive
ZEB2	Type 1 T helper cell	Adaptive
ENC1	Type 1 T helper cell	Adaptive
FAM134B	Type 1 T helper cell	Adaptive
FBXO30	Type 1 T helper cell	Adaptive
FCGR2C	Type 1 T helper cell	Adaptive
STAC	Type 1 T helper cell	Adaptive
LTC4S	Type 1 T helper cell	Adaptive
MAN1B1	Type 1 T helper cell	Adaptive
MDH1	Type 1 T helper cell	Adaptive
MMD	Type 1 T helper cell	Adaptive
RGS16	Type 1 T helper cell	Adaptive
IL12A	Type 1 T helper cell	Adaptive
P2RX5	Type 1 T helper cell	Adaptive
CD97	Type 1 T helper cell	Adaptive
ITGB4	Type 1 T helper cell	Adaptive
ICAM3	Type 1 T helper cell	Adaptive
METRNL	Type 1 T helper cell	Adaptive
TNFRSF1A	Type 1 T helper cell	Adaptive
IRF1	Type 1 T helper cell	Adaptive
HTR2B	Type 1 T helper cell	Adaptive
CALD1	Type 1 T helper cell	Adaptive
MOCOS	Type 1 T helper cell	Adaptive
TRAF3IP2	Type 1 T helper cell	Adaptive
TLR8	Type 1 T helper cell	Adaptive
TRAF1	Type 1 T helper cell	Adaptive
DUSP14	Type 1 T helper cell	Adaptive
IL17A	Type 17 T helper cell	Adaptive
IL17RA	Type 17 T helper cell	Adaptive
C2CD4A	Type 17 T helper cell	Adaptive
C2CD4B	Type 17 T helper cell	Adaptive
CA2	Type 17 T helper cell	Adaptive
CCDC65	Type 17 T helper cell	Adaptive
CEACAM3	Type 17 T helper cell	Adaptive
IL17C	Type 17 T helper cell	Adaptive
IL17F	Type 17 T helper cell	Adaptive
IL17RC	Type 17 T helper cell	Adaptive
IL17RE	Type 17 T helper cell	Adaptive
IL23A	Type 17 T helper cell	Adaptive
ILDR1	Type 17 T helper cell	Adaptive
LONRF3	Type 17 T helper cell	Adaptive
SH2D6	Type 17 T helper cell	Adaptive
TNIP2	Type 17 T helper cell	Adaptive
ABCA1	Type 17 T helper cell	Adaptive
ABCB1	Type 17 T helper cell	Adaptive
ADAMTS12	Type 17 T helper cell	Adaptive
ANK1	Type 17 T helper cell	Adaptive
ANKRD22	Type 17 T helper cell	Adaptive
B3GALT2	Type 17 T helper cell	Adaptive
CAMTA1	Type 17 T helper cell	Adaptive
CCR9	Type 17 T helper cell	Adaptive
CD40	Type 17 T helper cell	Adaptive
GPR44	Type 17 T helper cell	Adaptive
IFT80	Type 17 T helper cell	Adaptive
ASB2	Type 2 T helper cell	Adaptive
CSRP2	Type 2 T helper cell	Adaptive
DAPK1	Type 2 T helper cell	Adaptive
DLC1	Type 2 T helper cell	Adaptive
DNAJC12	Type 2 T helper cell	Adaptive
DUSP6	Type 2 T helper cell	Adaptive
GNAI1	Type 2 T helper cell	Adaptive
LAMP3	Type 2 T helper cell	Adaptive
NRP2	Type 2 T helper cell	Adaptive
OSBPL1A	Type 2 T helper cell	Adaptive
PDE4B	Type 2 T helper cell	Adaptive
PHLDA1	Type 2 T helper cell	Adaptive
PLA2G4A	Type 2 T helper cell	Adaptive
RAB27B	Type 2 T helper cell	Adaptive
RBMS3	Type 2 T helper cell	Adaptive
RNF125	Type 2 T helper cell	Adaptive
TMPRSS3	Type 2 T helper cell	Adaptive
GATA3	Type 2 T helper cell	Adaptive
BIRC5	Type 2 T helper cell	Adaptive
CDC25C	Type 2 T helper cell	Adaptive
CDC7	Type 2 T helper cell	Adaptive
CENPF	Type 2 T helper cell	Adaptive
CXCR6	Type 2 T helper cell	Adaptive
DHFR	Type 2 T helper cell	Adaptive
EVI5	Type 2 T helper cell	Adaptive
GSTA4	Type 2 T helper cell	Adaptive
HELLS	Type 2 T helper cell	Adaptive
IL26	Type 2 T helper cell	Adaptive
LAIR2	Type 2 T helper cell	Adaptive
ABCD1	Activated dendritic cell	Innate
C1QC	Activated dendritic cell	Innate
CAPG	Activated dendritic cell	Innate
CCL3L3	Activated dendritic cell	Innate
CD207	Activated dendritic cell	Innate
CD302	Activated dendritic cell	Innate
ATP5B	Activated dendritic cell	Innate
ATP5L	Activated dendritic cell	Innate
ATP6V1A	Activated dendritic cell	Innate
BCL2L1	Activated dendritic cell	Innate
C1QB	Activated dendritic cell	Innate
SNURF	Activated dendritic cell	Innate
SPCS3	Activated dendritic cell	Innate
CCNA1	Activated dendritic cell	Innate
CEACAM8	Activated dendritic cell	Innate
NOS2	Activated dendritic cell	Innate
SRA1	Activated dendritic cell	Innate
TNFRSF6B	Activated dendritic cell	Innate
TREM1	Activated dendritic cell	Innate
TREML1	Activated dendritic cell	Innate
RHOA	Activated dendritic cell	Innate
SLC25A37	Activated dendritic cell	Innate
TNFSF14	Activated dendritic cell	Innate
TREML4	Activated dendritic cell	Innate
VNN2	Activated dendritic cell	Innate
XPO6	Activated dendritic cell	Innate
CLEC4C	Activated dendritic cell	Innate
TNFAIP2	Activated dendritic cell	Innate
UBD	Activated dendritic cell	Innate
ACTR3	Activated dendritic cell	Innate
RAB1A	Activated dendritic cell	Innate
SLA	Activated dendritic cell	Innate
HLA-DQA2	Activated dendritic cell	Innate
SIGLEC5	Activated dendritic cell	Innate
SLAMF9	Activated dendritic cell	Innate
ABAT	CD56bright natural killer cell	Innate
C11orf75	CD56bright natural killer cell	Innate
C5orf15	CD56bright natural killer cell	Innate
CDHR1	CD56bright natural killer cell	Innate
DCAF12	CD56bright natural killer cell	Innate
DYNLL1	CD56bright natural killer cell	Innate
GPR137B	CD56bright natural killer cell	Innate
HCP5	CD56bright natural killer cell	Innate
HDGFRP2	CD56bright natural killer cell	Innate
KRT86	CD56bright natural killer cell	Innate
MLST8	CD56bright natural killer cell	Innate
ELMOD3	CD56bright natural killer cell	Innate
ENTPD5	CD56bright natural killer cell	Innate
FAM119A	CD56bright natural killer cell	Innate
FAM179A	CD56bright natural killer cell	Innate
CLIC2	CD56bright natural killer cell	Innate
COX7A2L	CD56bright natural killer cell	Innate
CREB3L4	CD56bright natural killer cell	Innate
CSF1	CD56bright natural killer cell	Innate
CSNK2A2	CD56bright natural killer cell	Innate
CSTA	CD56bright natural killer cell	Innate
CSTB	CD56bright natural killer cell	Innate
CTPS	CD56bright natural killer cell	Innate
CTSD	CD56bright natural killer cell	Innate
FST	CD56bright natural killer cell	Innate
GATA2	CD56bright natural killer cell	Innate
GMPR	CD56bright natural killer cell	Innate
HDC	CD56bright natural killer cell	Innate
HEY1	CD56bright natural killer cell	Innate
HOXA1	CD56bright natural killer cell	Innate
HS2ST1	CD56bright natural killer cell	Innate
HS3ST1	CD56bright natural killer cell	Innate
BCL11B	CD56bright natural killer cell	Innate
CDH3	CD56bright natural killer cell	Innate
MYL6B	CD56bright natural killer cell	Innate
NAA16	CD56bright natural killer cell	Innate
ClQA	CD56bright natural killer cell	Innate
ClQB	CD56bright natural killer cell	Innate
CYP27B1	CD56bright natural killer cell	Innate
EIF3M	CD56bright natural killer cell	Innate
CYP27A1	CD56dim natural killer cell	Innate
DDX55	CD56dim natural killer cell	Innate
DYRK2	CD56dim natural killer cell	Innate
RPL37A	CD56dim natural killer cell	Innate
NOTCH3	CD56dim natural killer cell	Innate
AKR7A3	CD56dim natural killer cell	Innate
GPRC5C	CD56dim natural killer cell	Innate
GRIN1	CD56dim natural killer cell	Innate
HLA-E	CD56dim natural killer cell	Innate
PORCN	CD56dim natural killer cell	Innate
PSMC4	CD56dim natural killer cell	Innate
UPP1	CD56dim natural killer cell	Innate
IL21R	CD56dim natural killer cell	Innate
KIR2DS1	CD56dim natural killer cell	Innate
KIR2DS2	CD56dim natural killer cell	Innate
KIR2DS5	CD56dim natural killer cell	Innate
GIPR	Eosinophil	Innate
KRT18P50	Eosinophil	Innate
LRMP	Eosinophil	Innate
FOSB	Eosinophil	Innate
RRP12	Eosinophil	Innate
GPR183	Eosinophil	Innate
NR4A3	Eosinophil	Innate
ST3GAL6	Eosinophil	Innate
DEPDC5	Eosinophil	Innate
PDE6C	Eosinophil	Innate
PKD2L2	Eosinophil	Innate
GPR65	Eosinophil	Innate
IL5RA	Eosinophil	Innate
P2RY14	Eosinophil	Innate
DACH1	Eosinophil	Innate
DAPK2	Eosinophil	Innate
EMR3	Eosinophil	Innate
ACADM	Immature dendritic cell	Innate
AHCYL1	Immature dendritic cell	Innate
ALDH1A2	Immature dendritic cell	Innate
ALDH3A2	Immature dendritic cell	Innate
ALDH9A1	Immature dendritic cell	Innate
ALOX15	Immature dendritic cell	Innate
AMT	Immature dendritic cell	Innate
ARL1	Immature dendritic cell	Innate
ATIC	Immature dendritic cell	Innate
ATP5A1	Immature dendritic cell	Innate
CAPZA1	Immature dendritic cell	Innate
LILRA5	Immature dendritic cell	Innate
RDX	Immature dendritic cell	Innate
RRAGD	Immature dendritic cell	Innate
TACSTD2	Immature dendritic cell	Innate
INPP5F	Immature dendritic cell	Innate
RAB38	Immature dendritic cell	Innate
PLAU	Immature dendritic cell	Innate
CSF3R	Immature dendritic cell	Innate
SLC18A2	Immature dendritic cell	Innate
AMPD2	Immature dendritic cell	Innate
CLTB	Immature dendritic cell	Innate
C1orf162	Immature dendritic cell	Innate
AIF1	Macrophage	Innate
CCL1	Macrophage	Innate
CCL14	Macrophage	Innate
CCL23	Macrophage	Innate
CCL26	Macrophage	Innate
CD300LB	Macrophage	Innate
CNR1	Macrophage	Innate
CNR2	Macrophage	Innate
EIF1	Macrophage	Innate
EIF4A1	Macrophage	Innate
FPR1	Macrophage	Innate
FPR2	Macrophage	Innate
FRAT2	Macrophage	Innate
GPR27	Macrophage	Innate
GPR77	Macrophage	Innate
RNASE2	Macrophage	Innate
MS4A2	Macrophage	Innate
BASP1	Macrophage	Innate
IGSF6	Macrophage	Innate
HK3	Macrophage	Innate
VNN1	Macrophage	Innate
FES	Macrophage	Innate
NPL	Macrophage	Innate
FZD2	Macrophage	Innate
FAM198B	Macrophage	Innate
HNMT	Macrophage	Innate
SLC15A3	Macrophage	Innate
CD4	Macrophage	Innate
TXNDC3	Macrophage	Innate
FRMD4A	Macrophage	Innate
CRYBB1	Macrophage	Innate
HRH1	Macrophage	Innate
WNT5B	Macrophage	Innate
ADAMTS3	Mast cell	Innate
CPA3	Mast cell	Innate
CMA1	Mast cell	Innate
CTSG	Mast cell	Innate
ARHGAP15	Mast cell	Innate
CPM	Mast cell	Innate
FCN1	Mast cell	Innate
FTL	Mast cell	Innate
HSPA6	Mast cell	Innate
ITGA9	Mast cell	Innate
RNASE3	Mast cell	Innate
S100A4	Mast cell	Innate
SIGLEC8	Mast cell	Innate
SLC6A4	Mast cell	Innate
PTGS2	Mast cell	Innate
EGR3	Mast cell	Innate
PILRA	Mast cell	Innate
CCR2	MDSC	Innate
CD14	MDSC	Innate
CD2	MDSC	Innate
CD86	MDSC	Innate
CXCR4	MDSC	Innate
FCGR2A	MDSC	Innate
FCGR2B	MDSC	Innate
FCGR3A	MDSC	Innate
FERMT3	MDSC	Innate
GPSM3	MDSC	Innate
IL18BP	MDSC	Innate
IL4R	MDSC	Innate
ITGAL	MDSC	Innate
ITGAM	MDSC	Innate
PARVG	MDSC	Innate
PSAP	MDSC	Innate
PTGER2	MDSC	Innate
PTGES2	MDSC	Innate
S100A8	MDSC	Innate
S100A9	MDSC	Innate
ASGR2	Monocyte	Innate
CFP	Monocyte	Innate
ASGR1	Monocyte	Innate
CD1D	Monocyte	Innate
UPK3A	Monocyte	Innate
ACTG1	Monocyte	Innate
ANXA5	Monocyte	Innate
ATP6V1B2	Monocyte	Innate
CFL1	Monocyte	Innate
DAZAP2	Monocyte	Innate
CTBS	Monocyte	Innate
EMR4P	Monocyte	Innate
HIVEP2	Monocyte	Innate
MARCKSL1	Monocyte	Innate
MBP	Monocyte	Innate
MMP15	Monocyte	Innate
PNPLA6	Monocyte	Innate
TMBIM6	Monocyte	Innate
PQBP1	Monocyte	Innate
TEX264	Monocyte	Innate
IKZF1	Monocyte	Innate
AKT3	Natural killer cell	Innate
AXL	Natural killer cell	Innate
BST2	Natural killer cell	Innate
CDH2	Natural killer cell	Innate
CRTAM	Natural killer cell	Innate
CSF2RA	Natural killer cell	Innate
CTSZ	Natural killer cell	Innate
CXCL1	Natural killer cell	Innate
CYTH1	Natural killer cell	Innate
DAXX	Natural killer cell	Innate
DGKH	Natural killer cell	Innate
DLL4	Natural killer cell	Innate
DPYD	Natural killer cell	Innate
ERBB3	Natural killer cell	Innate
F11R	Natural killer cell	Innate
FAM27A	Natural killer cell	Innate
FAM49A	Natural killer cell	Innate
FASLG	Natural killer cell	Innate
FCGR1A	Natural killer cell	Innate
FN1	Natural killer cell	Innate
FSTL1	Natural killer cell	Innate
FUCA1	Natural killer cell	Innate
GBP3	Natural killer cell	Innate
GLS2	Natural killer cell	Innate
GRB2	Natural killer cell	Innate
LST1	Natural killer cell	Innate
BCL2	Natural killer cell	Innate
CDC5L	Natural killer cell	Innate
FGF18	Natural killer cell	Innate
FUT5	Natural killer cell	Innate
FZR1	Natural killer cell	Innate
GAGE2	Natural killer cell	Innate
IGFBP5	Natural killer cell	Innate
KANK2	Natural killer cell	Innate
LDB3	Natural killer cell	Innate
BTN2A2	Natural killer T cell	Innate
CD101	Natural killer T cell	Innate
CD109	Natural killer T cell	Innate
CNPY3	Natural killer T cell	Innate
CNPY4	Natural killer T cell	Innate
CREB1	Natural killer T cell	Innate
CRTC2	Natural killer T cell	Innate
CRTC3	Natural killer T cell	Innate
CSF2	Natural killer T cell	Innate
KLRC1	Natural killer T cell	Innate
FUT4	Natural killer T cell	Innate
ICAM2	Natural killer T cell	Innate
IL32	Natural killer T cell	Innate
LAMP2	Natural killer T cell	Innate
LILRB5	Natural killer T cell	Innate
KLRG1	Natural killer T cell	Innate
HSPA4	Natural killer T cell	Innate
HSPB6	Natural killer T cell	Innate
ISM2	Natural killer T cell	Innate
ITIH2	Natural killer T cell	Innate
KDM4C	Natural killer T cell	Innate
KIR2DS4	Natural killer T cell	Innate
KIRREL3	Natural killer T cell	Innate
SDCBP	Natural killer T cell	Innate
NFATC2IP	Natural killer T cell	Innate
MICB	Natural killer T cell	Innate
KIR2DL1	Natural killer T cell	Innate
KIR2DL3	Natural killer T cell	Innate
KIR3DL1	Natural killer T cell	Innate
KIR3DL2	Natural killer T cell	Innate
NCR1	Natural killer T cell	Innate
FOSL1	Natural killer T cell	Innate
TSLP	Natural killer T cell	Innate
SLC7A7	Natural killer T cell	Innate
SPP1	Natural killer T cell	Innate
TREM2	Natural killer T cell	Innate
UBASH3A	Natural killer T cell	Innate
YBX2	Natural killer T cell	Innate
CCDC88A	Natural killer T cell	Innate
CLEC1A	Natural killer T cell	Innate
THBD	Natural killer T cell	Innate
PDPN	Natural killer T cell	Innate
VCAM1	Natural killer T cell	Innate
EMR1	Natural killer T cell	Innate
CREB5	Neutrophil	Innate
CDA	Neutrophil	Innate
CHST15	Neutrophil	Innate
S100A12	Neutrophil	Innate
APOBEC3A	Neutrophil	Innate
CASP5	Neutrophil	Innate
MMP25	Neutrophil	Innate
HAL	Neutrophil	Innate
C1orf183	Neutrophil	Innate
FFAR2	Neutrophil	Innate
MAK	Neutrophil	Innate
CXCR1	Neutrophil	Innate
STEAP4	Neutrophil	Innate
MGAM	Neutrophil	Innate
BTNL8	Neutrophil	Innate
CXCR2	Neutrophil	Innate
TNFRSF10C	Neutrophil	Innate
VNN3	Neutrophil	Innate
CBX6	Plasmacytoid dendritic cell	Innate
DAB2	Plasmacytoid dendritic cell	Innate
DDX17	Plasmacytoid dendritic cell	Innate
HIGD1A	Plasmacytoid dendritic cell	Innate
IDH3A	Plasmacytoid dendritic cell	Innate
IL3RA	Plasmacytoid dendritic cell	Innate
MAGED1	Plasmacytoid dendritic cell	Innate
NUCB2	Plasmacytoid dendritic cell	Innate
OFD1	Plasmacytoid dendritic cell	Innate
OGT	Plasmacytoid dendritic cell	Innate
PDIA4	Plasmacytoid dendritic cell	Innate
SERTAD2	Plasmacytoid dendritic cell	Innate
SIRPA	Plasmacytoid dendritic cell	Innate
TMED2	Plasmacytoid dendritic cell	Innate
ENG	Plasmacytoid dendritic cell	Innate
FCAR	Plasmacytoid dendritic cell	Innate
IGF1	Plasmacytoid dendritic cell	Innate
ITGA2B	Plasmacytoid dendritic cell	Innate
GABARAP	Plasmacytoid dendritic cell	Innate
GPX1	Plasmacytoid dendritic cell	Innate
KRT23	Plasmacytoid dendritic cell	Innate
PROK2	Plasmacytoid dendritic cell	Innate
RALB	Plasmacytoid dendritic cell	Innate
RETNLB	Plasmacytoid dendritic cell	Innate
RNF141	Plasmacytoid dendritic cell	Innate
SEC14L1	Plasmacytoid dendritic cell	Innate
SEPX1	Plasmacytoid dendritic cell	Innate
EMP3	Plasmacytoid dendritic cell	Innate
CD300LF	Plasmacytoid dendritic cell	Innate
ABTB1	Plasmacytoid dendritic cell	Innate
KLHL21	Plasmacytoid dendritic cell	Innate
PHRF1	Plasmacytoid dendritic cell	Innate

## Sheet: Table S3.
Table S3. Infiltration levels of 28 immune cells and anti-tumor immunity score and pro-tumor immunity scores of 407 samples in the TCGA-BLCA cohort
ID	Activated B cell	Activated CD4 T cell	Activated CD8 T cell	Activated dendritic cell	CD56bright natural killer cell	CD56dim natural killer cell	Central memory CD4 T cell	Central memory CD8 T cell	Effector memeory CD4 T cell	Effector memeory CD8 T cell	Eosinophil	Gamma delta T cell	Immature B cell	Immature dendritic cell	Macrophage	Mast cell	MDSC	Memory B cell	Monocyte	Natural killer cell	Natural killer T cell	Neutrophil	Plasmacytoid dendritic cell	Regulatory T cell	T follicular helper cell	Type 1 T helper cell	Type 17 T helper cell	Type 2 T helper cell	anti	pro
TCGA.DK.AA6S.01	-0.047857	-0.238779	0.255421	0.69768	-0.0477834	0.144445	1.33912	-0.753298	0.132992	0.743832	-1.32896	0.00527257	-0.146095	-1.23248	0.424784	0.17695	0.786953	-0.786042	0.108465	0.757958	1.05951	-0.716938	0.78624	0.252458	0.109972	0.829721	0.990057	0.381735	5.76643	0.827196
TCGA.DK.A6B2.01	0.133042	0.647432	0.280064	0.765532	0.355821	1.47182	0.0722581	1.80979	1.36441	0.741618	0.0942963	0.903776	0.514952	-0.234394	0.683014	0.296727	0.580247	0.972199	1.23945	0.677675	0.271072	-0.650893	1.18512	0.535422	0.764689	1.05225	-0.643865	-0.315617	7.39406	3.25472
TCGA.GU.A763.01	-0.948809	-0.877797	0.313614	-0.894894	1.82908	0.535989	-0.812844	-1.00907	-1.17807	-0.521724	0.556725	-0.542983	-0.899625	-0.579106	-0.575525	-1.37235	-1.02554	-0.731264	-0.681613	-1.2614	-1.39558	-0.839077	-1.83635	-1.02716	-1.12206	-1.01816	0.868189	-1.04984	-5.95865	-6.39662
TCGA.XF.A9T4.01	0.0966363	0.00375789	-0.290488	1.13553	-0.147053	-0.592285	0.951139	-0.670683	-0.321528	0.420686	0.797485	0.428727	0.0843615	-0.0344349	0.342085	-0.0127553	-0.058411	0.909771	-0.388801	1.42552	0.311391	0.933035	0.440672	-0.0612928	-0.350977	0.251318	1.90952	0.909431	4.97912	1.8788
TCGA.FD.A5C1.01	0.7441	1.77417	1.18828	1.3106	1.68209	0.51406	1.62308	1.07075	-0.36077	1.37928	0.0250264	1.42244	0.988805	0.750689	1.46332	1.7028	1.57089	-0.483559	-0.488022	1.04893	1.31116	3.20635	0.536891	1.7272	1.38031	1.17359	0.239804	0.879826	13.441	9.44288
TCGA.GU.A42Q.01	-0.542089	-0.137401	-1.29142	0.146797	0.188974	0.787143	-0.430589	-1.3536	-1.06355	-0.929974	-1.32252	-1.00643	-1.1105	1.19362	-1.24427	-1.97775	-0.629889	0.889537	-0.675291	-1.63276	0.207457	0.711108	-1.14961	-0.266007	-1.85883	-1.00406	-1.04336	0.114931	-8.34349	-0.48297
TCGA.DK.A3IL.01	0.603777	-1.07044	-0.510195	-0.747911	-1.57703	-0.0250655	-1.15892	-0.64126	0.743059	-0.953424	-1.27294	-1.35418	-0.272064	-0.0680463	-0.848146	-1.37883	-0.708484	-0.901663	0.292872	-0.672309	-1.13312	-1.35383	-0.417201	-1.43797	0.172988	-0.959416	-0.0772479	-0.479524	-8.75822	-5.33827
TCGA.XF.AAMH.01	-1.08212	-1.57155	-0.407476	-0.980031	-0.845467	-0.270937	-0.406832	-1.32987	-1.34021	-1.36694	-1.29172	0.251211	-1.36243	-1.72192	-0.506305	-0.615108	-0.729689	-0.933664	-1.13763	-0.189084	-0.93745	-0.812088	0.0313995	-0.43616	-1.56937	-1.07415	-0.501746	-0.227974	-10.9508	-4.67367
TCGA.FT.A61P.01	-0.124068	0.163002	0.270998	1.29965	-0.140492	0.843448	0.374534	1.20706	0.467631	1.19873	0.0271801	0.919013	0.522564	-0.593601	0.563852	1.33174	0.788778	1.1336	-0.84201	1.27229	0.984955	0.310118	0.996045	1.05016	1.32465	0.882515	0.354443	1.46318	8.33532	5.42198
TCGA.G2.A2EF.01	0.36112	1.04204	1.5016	1.31109	1.60395	-1.73481	1.12034	-0.735754	-0.268665	0.733785	-0.145866	0.270238	1.00937	-0.147178	0.753422	-0.451516	0.687646	1.00562	0.0258712	1.54488	1.73058	-0.148913	0.587155	1.12087	0.905969	0.564585	-0.242014	1.00168	9.90642	2.11987
TCGA.XF.A9T2.01	-0.651666	-0.270313	-0.156795	0.295065	-0.739563	-2.00315	-0.270769	-2.4075	1.64076	-0.977517	-0.985987	-0.0514797	-0.751206	-0.703434	-0.579483	0.327715	-0.395197	0.466456	-1.87232	0.37126	-0.143176	-1.05271	0.225657	-0.116185	-1.62089	-0.731116	-0.898062	-1.02761	-3.88022	-5.64896
TCGA.C4.A0F7.01	-0.911483	0.644504	-1.06837	-1.28315	0.801315	-0.942079	0.403797	-0.283121	0.103357	-1.13802	1.58495	-1.26186	-0.994655	1.16355	-0.926815	-0.0625852	-0.779404	1.89412	-1.10103	-0.457087	0.190873	0.350307	-0.616914	-0.568285	-0.480264	-0.345837	-0.422001	2.26237	-2.85374	-0.319643
TCGA.G2.A2EK.01	0.806386	-1.83865	-0.263899	-0.498679	-0.298869	-0.732141	0.443169	-0.530005	0.551288	-0.436673	-0.9748	-1.16024	0.0147931	1.0933	-0.319686	-0.437837	-0.568201	-0.577776	0.689026	-0.54039	-0.992018	-1.10691	0.224634	-0.517996	-0.45152	-0.325851	-0.156662	-1.46133	-4.88724	-3.38833
TCGA.FD.A6TB.01	2.46678	1.26058	1.15094	0.829236	0.416547	1.69338	1.20472	1.46309	1.19494	0.928255	1.22918	0.438904	2.31686	0.862502	0.926926	1.50726	1.33493	1.03592	1.04465	0.60032	0.657983	-0.0976667	1.08759	0.764305	1.25259	1.39346	-0.124328	0.741435	10.9757	7.3134
TCGA.UY.A9PD.01	0.160826	0.447846	-0.426301	-0.585659	0.0359184	-0.119213	-0.331926	-0.652101	0.743123	-0.735641	0.0212576	-0.204663	-0.560447	-0.324851	-0.57255	0.326576	-0.633378	0.245202	0.329111	-0.939013	-0.613959	-1.2656	-0.297093	-1.11758	-0.162758	0.0236309	-0.546378	-1.36215	-3.58046	-5.69241
TCGA.DK.AA6P.01	-0.852416	-1.58421	-0.816207	-1.89286	-0.0854688	0.415425	-1.15396	-1.35499	-2.00473	-1.29838	-0.599209	-0.189499	-0.963544	-1.69041	-0.622295	-0.295156	-1.61332	0.600461	-0.385778	-1.84721	-1.59007	-1.42767	-0.847596	-1.36538	-1.03914	-1.04927	-0.579562	-0.860921	-15.2522	-8.01216
TCGA.GV.A3QK.01	0.0124146	0.989529	0.553638	-0.0066109	0.287099	0.986003	0.344171	-0.111433	-0.109443	0.51413	1.00751	0.413626	0.106259	0.295593	-0.47292	-0.219781	-0.0113274	-0.710906	1.21836	-0.684012	-0.662307	-0.392214	-0.117155	-0.337202	-0.694641	0.332187	1.9789	0.430703	3.42585	0.38148
TCGA.GC.A3I6.01	-0.51062	1.45463	0.0871226	0.651414	0.413363	0.115373	0.407364	0.277322	-0.263442	1.01252	1.06653	1.04131	0.195208	0.563609	-0.0505352	-0.493929	0.217065	0.756408	-0.677304	0.566415	0.913983	0.456212	0.150379	0.409902	-0.218685	-0.0251664	3.05354	1.65212	7.49553	3.51412
TCGA.UY.A8OC.01	-0.450789	-0.566649	-0.806117	0.661098	0.519746	0.863988	0.910501	0.327336	0.0401827	-0.155288	-0.188345	-0.0468166	-0.637244	-0.0756967	-0.275612	-0.302775	0.0890862	-0.733664	-0.164452	0.866848	0.592484	-0.116273	-0.0363269	0.911334	-0.713432	0.321106	-0.285494	-0.0126819	2.42575	1.34782
TCGA.FD.A3B7.01	1.1044	1.70388	1.62267	0.941364	0.777237	0.261726	0.734668	2.38875	1.0559	1.50436	0.183847	2.49002	1.36446	0.96336	1.55924	0.721877	1.74465	1.74253	0.338756	1.71861	1.69504	1.33841	1.48339	1.78378	1.27098	2.10506	0.520795	0.901351	16.2745	10.0359
TCGA.ZF.A9R1.01	0.388833	-0.406613	-0.563977	-1.02083	-0.0951081	0.282835	0.742158	-0.373892	-0.233899	-0.577254	-0.3682	-0.866276	0.00592244	-0.496931	-1.19115	-1.11219	-0.778027	0.349712	-0.00436356	-0.489434	-0.990134	-0.765959	-0.728647	-1.12517	-0.554814	-0.820681	-1.85452	-0.438883	-6.68419	-5.24194
TCGA.ZF.A9RF.01	0.319832	1.81294	1.74108	1.07334	-0.571462	0.645723	1.29542	0.847971	0.438478	1.16961	-0.879042	0.197167	0.743882	-0.310435	0.992335	-0.237857	1.1005	1.49336	-0.389977	0.260132	1.99583	0.0104226	1.00797	1.30975	1.33044	0.787048	-0.280239	0.979411	10.5702	5.73569
TCGA.4Z.AA7Q.01	0.636546	1.50431	1.62034	0.814053	0.79794	1.54905	0.467273	0.175303	-0.290942	1.33378	-0.216451	0.263736	0.973365	0.978544	0.217896	0.248589	1.40675	1.27582	-0.652086	0.477659	0.276792	1.57745	1.04344	0.352174	0.714871	0.850984	1.4327	1.28868	9.4602	8.41398
TCGA.E7.A519.01	0.624592	-1.18825	0.729878	0.524092	0.417909	2.02114	-0.0758597	-0.559546	-1.24012	0.804536	0.327497	-0.194927	-0.0968899	-1.1153	1.07239	0.148294	0.896234	-2.26414	1.46436	-0.685616	-0.47881	0.931522	-0.929782	-0.439087	-0.137735	-0.0267652	1.49074	-2.48915	-0.287815	0.415974
TCGA.G2.A3VY.01	-0.994933	-0.717193	-1.32036	-1.93605	0.143065	-0.888817	-1.58152	-1.11027	-0.0325218	-1.72053	-1.2089	-1.84025	-0.926819	-1.61767	-1.13064	-0.775476	-1.87892	-1.30059	-0.204603	-2.35966	-1.44167	-1.12302	-0.654586	-1.54958	-1.24707	-1.10932	-1.7571	-1.53188	-14.5835	-10.3751
TCGA.C4.A0EZ.01	-1.02204	-0.571403	-1.0698	-1.08168	-0.279435	-1.62633	-2.45264	-3.18875	0.0381731	-2.49775	-0.97609	-1.31841	-1.21045	-2.20949	-1.66872	-1.06029	-1.38172	-1.97876	-0.914535	-0.0980834	-1.36218	-1.06202	-1.76392	-0.562497	-1.20171	-2.32024	-1.14161	-0.50844	-13.566	-10.5737
TCGA.XF.A9SY.01	1.01952	1.77149	1.41047	1.81755	0.966404	-0.558958	1.08137	1.04457	0.282145	1.59067	-0.0318613	1.35737	1.39846	0.736819	1.39895	0.410629	1.57839	1.22523	-0.165101	1.23899	1.93449	1.00231	1.18146	1.95771	1.29049	1.4802	-0.131929	0.635414	14.4864	7.9321
TCGA.FD.A43U.01	0.930504	-0.0339409	1.54774	1.33597	0.524269	2.40393	1.13378	1.71257	-0.18423	1.56101	-0.0541457	1.38566	0.975369	0.0089038	2.12377	2.23543	2.20744	0.46966	2.33268	0.754933	1.06922	0.107836	1.76985	1.89358	1.54913	1.84828	1.46762	-1.30862	12.7372	8.47155
TCGA.4Z.AA7S.01	-0.291995	-0.342913	-0.504918	-1.39961	1.04005	-1.09455	-1.03981	-0.786348	-0.331167	-1.31774	0.322816	-1.11203	-0.487421	-0.18667	-0.769792	-0.669602	-1.37433	-0.132275	0.0942437	-1.33568	-1.29648	-0.892655	-1.69802	-1.14722	-0.669412	-1.20153	0.50228	-0.518031	-8.01386	-7.68127
TCGA.DK.AA75.01	-1.25419	-0.506765	-0.590996	-1.63446	-0.779673	0.0057633	-1.98444	-1.38052	-1.20989	-1.74779	-1.33375	-0.997669	-1.83596	-2.69761	-0.463688	0.533374	-1.1626	-1.18143	-0.141553	-2.32006	-1.49475	-0.183387	-0.902652	-1.74167	-2.00606	-1.22999	-0.789988	0.0645841	-15.3493	-6.38366
TCGA.XF.AAML.01	0.0525463	0.406878	0.0504813	0.170788	0.135498	0.587996	-1.83044	-0.610229	-0.913087	0.350267	-0.784556	0.249305	-0.113401	-0.353815	-0.804723	-0.417765	-0.24486	-1.98827	-1.31741	-0.177401	-1.03162	-0.656326	-1.88343	-0.82649	-0.580324	-0.192439	-0.252065	0.111317	-3.89337	-4.07033
TCGA.DK.A6B5.01	-0.877578	-0.246113	-0.626276	0.477285	0.560601	1.55693	0.701111	-0.108306	-0.910341	0.457797	-0.615272	-0.716159	-0.3354	1.89667	-0.154504	-0.452441	0.30988	-0.197981	-0.553777	0.635739	0.00260877	0.707902	0.788261	0.22672	0.0989146	-0.276674	1.45592	-0.502751	2.12335	4.82911
TCGA.KQ.A41R.01	-0.75891	-0.601723	-0.553359	-0.952888	-0.240257	0.440025	-1.01995	-1.0675	-0.0847518	-1.13425	-0.775785	-0.0401606	-0.937558	-2.23324	-1.11437	-0.387524	-1.38035	-1.04558	1.07372	-1.86499	-0.849581	-0.849856	-0.357508	-1.33975	-1.38957	-0.964595	0.709824	-1.05241	-8.62402	-7.65422
TCGA.4Z.AA87.01	0.0344054	1.0729	0.699253	0.338023	-0.184392	0.756277	-1.63723	-0.522891	-0.420408	-0.490916	-0.190978	-0.630491	-0.17005	-0.302938	-0.212285	0.0477715	-0.180357	0.381891	-0.273986	-1.18979	-0.620204	-0.3491	-1.34258	-0.455579	-0.365803	-0.232994	-0.22199	0.479795	-3.41063	-1.60677
TCGA.FD.A6TE.01	-0.540753	0.224743	-0.2251	-0.675104	-1.05101	-1.09924	-0.676505	-0.713081	-0.757099	0.0709343	-0.138696	-0.232354	-0.151769	1.16597	-0.750597	-0.620626	-0.536747	0.625132	-1.83669	-1.00349	-0.619266	-0.588104	-1.27397	-1.40501	-1.03581	-1.12951	0.557763	0.00239871	-5.99672	-4.4853
TCGA.YC.A9TC.01	-0.0298386	-0.282592	0.102186	-0.238568	-0.796483	-0.679975	-1.61045	-1.11409	-1.74813	-1.30817	-0.38178	0.127493	-0.815383	-1.58612	-0.97761	-1.52594	-0.740131	-0.194987	-1.20439	-0.981287	-0.520902	-0.330147	-0.964781	-0.117937	-0.201407	-0.455541	1.40403	-0.316208	-7.54999	-5.71291
TCGA.BT.A2LA.01	-0.473117	-0.936211	-1.24165	-1.64657	-2.04	-0.994477	-3.20238	-3.19948	-0.597626	-2.12974	0.569249	-2.22714	-1.55346	-1.81948	-1.03082	-0.987863	-2.05221	-2.58395	-2.32066	-1.12399	-0.96051	-1.6321	-1.77507	-1.08797	-1.35573	-1.92967	-3.56638	1.00552	-18.4362	-9.33438
TCGA.FD.A3NA.01	-0.637616	0.689828	0.242318	-0.059198	2.19652	-0.870406	0.165836	0.912264	-0.473487	0.592024	-0.334899	1.07334	-0.20112	0.573775	-0.168154	0.0463945	0.324526	0.320455	0.589714	-0.0603346	0.467157	-0.0654524	0.0259581	0.202976	0.0911906	-0.062615	0.220887	0.728093	4.63468	0.751314
TCGA.BT.A42F.01	1.23224	1.50375	1.85378	1.64228	-0.322427	0.63085	1.10292	0.660613	1.01003	1.42986	1.30468	1.65555	1.12315	1.36104	1.16239	0.547482	1.73949	0.113782	-0.324485	-0.0674619	1.06303	1.88939	0.0667847	1.71756	1.4187	1.19037	1.10496	-0.425677	12.1717	8.14182
TCGA.ZF.AA5P.01	1.10844	-0.0409471	-0.491537	0.397843	-1.36323	-0.314696	0.952401	0.845184	1.14755	0.351058	0.704707	-0.647866	0.428899	0.235621	0.516894	1.29808	0.161662	-0.264786	0.802047	1.46722	0.951338	-0.0246663	1.48558	-0.029143	0.928385	1.10576	0.639482	1.44905	5.96212	3.4803
TCGA.2F.A9KW.01	-0.330224	0.814709	-0.556585	0.753448	-0.961995	1.86622	-1.41092	-0.390341	1.87395	-0.735581	0.539591	0.786447	-0.629655	0.438715	0.401887	0.554338	-0.361532	-2.11037	-0.793331	0.518083	0.319555	1.03184	0.699657	0.501653	0.605107	0.150359	-0.681753	1.38172	-0.307072	5.96015
TCGA.4Z.AA80.01	-0.594622	1.07397	-0.155477	-0.977645	1.83276	0.121561	-1.20029	-1.06727	-0.740645	-1.45458	1.2415	-0.967712	-0.518164	-0.704673	-1.3475	0.802015	-1.31081	-0.613711	-1.83556	-1.62591	-1.12758	-0.897231	-1.64705	-1.17559	-1.22919	-1.19199	-1.17473	0.561688	-7.80939	-6.39961
TCGA.XF.A8HD.01	0.637455	1.32228	1.88611	2.08099	0.0736086	-1.09167	0.748179	0.208645	0.0668029	1.27085	-1.22437	0.660522	0.630359	-0.641466	-0.240281	0.242361	0.380715	-0.564145	-0.0266927	1.05479	0.383942	-0.855978	-1.17751	0.192322	0.394812	0.831919	0.705905	1.37398	10.553	-2.0599
TCGA.2F.A9KT.01	-1.03555	-0.17419	-1.15138	-0.571947	0.946783	0.40776	0.448915	0.13961	-0.779873	-1.3226	-1.09662	-0.391573	-0.673543	-0.667239	-0.44063	-0.809399	-0.197439	-0.422851	-0.142841	-0.79557	-0.233616	0.590466	0.452671	-0.480673	-0.503654	-0.896691	0.838569	-0.389561	-3.55199	-0.724645
TCGA.E7.A677.01	-0.238442	-0.0731026	-0.477616	0.211975	1.24867	0.382279	-0.470531	-0.873122	1.68118	-0.167001	0.64408	-1.15031	-0.55712	-0.499776	-0.373064	-0.0756543	-0.875349	0.935836	0.261649	-0.0102518	0.262646	-0.238366	0.693427	-0.16621	-0.000490641	-1.22904	1.25229	0.29503	1.3561	-0.782029
TCGA.SY.A9G0.01	1.58165	-1.30478	-0.660726	-0.524767	-1.95845	-1.75819	0.968741	0.889091	2.08695	0.182541	0.522367	-0.538692	0.916074	0.226109	0.0707738	1.40072	-0.20963	0.76479	0.218092	0.92494	0.609943	-0.479633	0.970015	0.0184388	1.16029	0.819158	-0.0218611	0.0260477	1.92383	-1.13607
TCGA.YF.AA3M.01	-0.840195	0.98968	-0.879113	-0.7328	-0.426693	0.596416	-0.295031	-0.39576	-1.05145	-0.519584	-0.291575	0.282258	-1.15877	0.133099	-0.299141	0.128947	-0.518456	1.46411	-0.990488	-0.219606	-0.214273	-0.145778	-1.0514	-0.380561	-1.30721	-0.895109	-0.655235	1.15393	-5.29497	-0.511896
TCGA.CU.A0YR.01	-0.0447502	1.52784	0.335461	1.15578	-0.77781	1.84935	-0.602231	1.06562	0.580956	0.245354	0.500423	1.47803	0.694759	-0.0809028	1.03558	0.777536	0.773685	0.873834	0.74013	0.771411	0.899623	0.0214281	0.888505	1.39188	1.00129	0.817821	-0.771208	-0.753439	5.24862	5.12609
TCGA.K4.A83P.01	3.97092	1.19517	1.73547	1.42917	-0.0951299	1.00187	1.51635	2.02182	1.44804	1.51262	2.4959	-0.160511	3.3804	0.560225	1.5571	2.72212	1.65724	1.1346	2.60777	1.13748	1.48723	-0.141808	1.33003	1.20879	2.05813	2.35144	0.541329	0.0955826	15.9077	7.26902
TCGA.ZF.A9RL.01	-1.13807	-0.626836	-0.741949	-1.58847	1.24776	-0.56628	-1.79052	-1.56388	0.538802	-1.44043	-1.64927	-1.30994	-1.09753	-0.0394465	-0.586072	-1.42686	-1.79709	-0.722919	-0.83122	-2.2523	-1.56209	-1.19998	-1.13724	-1.2802	-1.20782	-2.0221	-0.303607	-0.534608	-11.8312	-7.14091
TCGA.FD.A43S.01	3.42901	-0.0650707	1.96582	1.1585	0.203024	1.10721	1.67455	1.33593	-0.235074	1.7	1.49344	1.0132	2.07996	0.549267	1.88713	1.99779	1.61635	0.570074	3.04242	0.986575	0.821255	-0.0807343	1.48496	0.716738	1.14964	1.77892	-0.0405914	-0.836164	11.2838	6.44476
TCGA.GV.A3QH.01	-0.84347	-1.01384	-0.847894	-1.21037	-1.04113	-0.187742	-2.13698	-1.03283	-0.712412	-1.4724	-1.25749	-0.844481	-0.728013	-2.75271	-1.61565	-0.653677	-1.43615	1.39507	-0.140102	-0.615844	-1.71881	-0.75905	-1.32108	-1.41824	-1.36343	-1.03641	0.47961	-0.252253	-12.2223	-8.99016
TCGA.4Z.AA84.01	-0.216457	0.0343363	-0.388	-1.41806	-1.12397	0.514602	-1.67536	-2.17684	-1.29126	-0.756668	-0.707877	-0.150739	-0.713125	-1.63909	-1.39807	-1.03483	-0.753197	-1.00561	-1.99929	-0.996565	-0.559669	0.338726	-2.16137	-0.0770178	-1.59667	0.0301992	1.11751	-0.0455528	-9.02751	-5.0596
TCGA.K4.A4AC.01	-0.118452	0.686896	0.345054	-0.0732126	1.61182	0.234041	0.0322741	0.0270848	-0.378626	0.477408	-1.50057	0.536614	0.0915664	2.05474	0.86832	-0.139041	0.789409	0.232337	0.345267	0.232963	0.745896	0.115051	-0.239061	0.657833	0.206189	-0.17428	-0.238714	0.900781	3.29456	5.32637
TCGA.K4.A6MB.01	-0.908787	0.107085	-0.927908	-0.453449	-0.379005	-0.221803	-0.378357	0.302848	-0.0463727	-0.691056	-0.262329	-0.347786	-1.17636	0.571447	-0.695634	-0.252683	-0.360318	-1.06467	0.0797936	-0.72925	-0.428963	-0.161329	0.643438	-0.732219	-0.243728	-0.555737	-0.0198687	-0.28658	-4.20003	-1.243
TCGA.S5.A6DX.01	1.39824	0.24996	1.78914	1.50458	-0.401892	1.85013	0.0907539	-0.13585	-0.440267	0.80491	0.217583	0.647526	0.498739	-0.360415	1.48908	0.596435	1.6948	-1.35864	2.33979	1.07303	0.316126	0.402049	1.45203	0.795773	0.824741	0.808326	0.824858	-1.27277	6.48367	6.05068
TCGA.GU.A766.01	0.864823	2.09108	2.50658	2.17245	3.38212	-0.505799	1.48442	0.669575	0.335358	2.01532	0.54065	1.46104	1.50426	0.835779	2.09432	0.994166	2.0023	0.121723	0.520777	1.23268	1.97461	2.66338	1.53609	1.42569	1.8488	1.51938	2.13101	1.33028	19.216	10.622
TCGA.HQ.A5ND.01	-0.816841	0.969255	-0.523408	-0.909868	0.989719	-0.685468	-1.06948	-0.333238	0.31777	-0.563688	-1.2588	-0.665576	-0.956812	0.0339566	-1.55171	-0.57965	-0.584467	1.16053	-1.21742	-0.775135	0.219381	-0.462498	-1.86744	-0.769835	-1.04815	-0.524439	-0.0552225	1.9545	-2.25835	-3.93297
TCGA.E7.A7XN.01	0.276609	1.37797	2.49167	2.0666	1.34761	0.0232036	0.95062	0.437678	0.0103862	1.76589	-0.05746	0.219843	1.09735	0.0111001	0.0269423	-0.481581	1.37023	-0.153406	0.986516	0.19815	1.07033	1.25425	-0.405865	0.676804	0.34244	1.01983	2.62915	1.59187	14.1785	4.54854
TCGA.XF.AAMW.01	0.360515	0.319821	-0.787284	0.982334	0.141246	-1.49458	0.928906	0.310479	-0.0184358	0.592414	0.615211	0.389666	0.513806	-0.18767	0.244836	-0.537372	0.438786	0.887989	-0.682847	1.31408	0.488073	0.581769	0.655896	1.11101	-0.102591	0.638708	0.494622	0.876219	5.40497	2.22626
TCGA.GC.A4ZW.01	-0.835136	-0.793064	-0.308042	-0.362955	-0.146945	-0.492021	-0.131253	-0.608274	-0.547256	-1.23108	-0.325347	-1.18366	-0.837473	-0.634504	-1.1268	-1.35652	-0.947767	-0.331801	-0.533166	-1.11627	-0.847964	-1.22949	-0.856763	-0.826689	-1.35744	-1.30829	-1.01656	-1.53068	-8.41795	-7.64471
TCGA.G2.AA3B.01	-0.400553	0.356287	0.300742	-0.601733	0.905449	-2.62846	-1.27081	-1.23523	-0.382664	-0.326135	-1.03397	0.347284	-0.34349	-1.00383	-1.63982	-0.268137	-0.338671	-1.6258	0.489284	-1.35102	-0.869231	-0.340872	-1.94559	-1.23869	-0.977381	-1.03946	0.776601	-0.339973	-4.7372	-8.84744
TCGA.DK.A2HX.01	-0.342968	-1.26833	-0.891916	-0.277483	-1.77037	0.120952	-0.539462	1.69354	0.288044	0.0250082	-1.16482	-0.423197	0.0194939	-0.280454	0.247334	0.679346	0.138234	-0.0222783	1.04115	1.10252	0.437928	0.880615	1.75829	0.333562	0.395761	0.73891	-0.61258	0.343603	-1.07418	3.54213
TCGA.GC.A3RB.01	-0.633234	0.34603	-0.298757	-0.895707	-0.0962298	0.0657289	-0.136174	-0.385797	-1.73766	-0.805961	-1.46412	-0.293892	-0.717659	-0.844239	-0.710856	-1.31767	-0.298702	0.762718	-0.685091	-1.28161	-0.263591	-0.881501	-0.712189	-0.463505	-0.696164	-0.233147	-2.07078	1.4702	-7.7886	-2.37506
TCGA.GV.A40E.01	-0.710173	0.669188	-0.424986	-0.0604483	-0.448601	0.0828528	0.197401	-0.114383	0.187653	-0.0955429	-1.24208	0.283967	-0.0121366	-0.408972	0.0848039	0.157758	0.182215	-0.55213	-1.45916	0.65213	0.474136	2.26299	1.18335	0.78135	-0.124289	0.28887	-0.326419	1.33246	0.998998	5.23806
TCGA.FJ.A3ZF.01	-0.970237	-0.125642	-1.25402	-1.80383	-2.39793	-0.234593	-2.5024	-0.805169	0.21844	-1.86984	-2.13209	-2.24046	-1.4534	-3.34643	-2.05211	-0.741838	-2.09018	-1.06651	-0.888654	-2.51378	-1.932	-1.2072	-1.29141	-1.83793	-1.50717	-0.933484	-0.325462	-1.08014	-14.831	-11.6513
TCGA.XF.A9SU.01	0.420754	-0.302876	0.32233	0.0410384	-0.897258	0.940893	0.423585	0.739213	0.292615	0.0794168	-0.225519	1.17135	0.0966208	-0.618854	0.399245	0.547248	0.516814	-0.307882	1.32994	0.245301	-0.17204	0.0369999	0.0881291	0.206222	0.825235	0.553019	-0.0621429	-0.0263007	1.2622	1.54315
TCGA.ZF.A9R9.01	0.0595996	-0.58674	-0.431137	-0.320332	-2.8131	0.918267	1.06913	0.774904	1.30177	0.335743	-0.0266747	-1.54461	-0.27095	-0.822957	-0.109277	0.617035	-0.414903	-0.400619	0.456403	0.734729	0.57025	-0.817458	1.01786	-0.503016	-0.499955	-0.0825218	-0.514506	-1.95092	0.85129	-2.6824
TCGA.DK.A2I2.01	0.236929	0.447134	0.0305541	1.97089	1.38202	-1.22173	1.90128	0.82647	-0.0415558	0.845644	-0.538315	1.50762	0.613117	1.46996	0.919393	0.124958	1.19881	0.847265	0.423233	1.127	0.887693	2.11135	0.226633	2.02345	0.592719	0.853855	-0.30443	0.78824	9.92656	7.38131
TCGA.FD.A3SQ.01	0.610334	-1.52749	-0.66038	0.708018	-0.270462	-0.313248	1.06216	0.991268	0.565725	0.506944	0.065418	-0.237795	0.463595	1.32902	0.389156	0.533312	0.37834	-0.842779	0.174584	0.705099	0.570793	-0.614975	1.05289	0.861869	0.657917	0.189286	1.38503	-0.599701	4.22599	2.48335
TCGA.XF.A9SH.01	-0.363129	-1.6495	-0.809947	-0.538016	-0.479694	-0.379016	-0.0313366	-0.259931	-0.430649	-0.271108	-0.169753	-0.941085	-0.294801	2.03194	0.16074	-0.682724	-0.737011	-0.515128	0.622592	-0.535526	-0.756214	-0.421773	-1.32644	-0.309909	0.287685	-0.789227	-0.200963	-1.11182	-6.75211	-2.12522
TCGA.XF.A8HC.01	-1.10173	-0.574474	-1.22306	-1.54742	-1.55205	1.40599	-1.94668	-0.628123	-1.42368	-1.87617	-1.51064	-1.37342	-1.13847	-1.45927	-1.56633	-1.20537	-1.77408	-1.80651	-0.346442	-1.38326	-1.6114	-0.402986	-1.20895	-1.87683	-1.86904	-1.50372	0.400005	-1.28846	-14.87	-8.17091
TCGA.K4.A5RI.01	-0.705082	-0.181216	-0.0694718	-0.310745	-0.121709	1.01467	0.396883	-0.370698	-0.170255	-0.314697	-0.180364	-0.50453	-0.467689	0.828462	-0.190658	-0.441443	-0.116272	1.50562	-0.558321	0.202179	0.199919	-0.000352555	-0.218127	-0.0756026	-0.560771	-0.162826	-0.361009	0.168439	-1.26365	1.41056
TCGA.BT.A20W.01	0.294667	0.947985	0.393843	-0.397509	-0.688726	-0.63489	0.236949	0.00828175	-0.0257044	-0.297053	0.895131	-0.294879	0.00394783	-0.576258	-0.481798	0.202652	-0.519839	0.415236	1.02915	-0.178568	-0.320631	-1.12146	-0.134485	-0.38988	0.121735	0.0110577	-0.161184	0.559586	-0.471258	-3.29903
TCGA.CU.A3YL.01	-0.595277	-1.19197	-0.48041	-1.13388	0.134162	0.55861	-0.472597	-1.00627	-1.55561	-0.63805	-0.5848	-0.619839	-0.429788	-1.35858	-1.0069	-0.930245	-0.916098	-0.10611	0.522514	-0.602273	-1.12652	-1.1092	0.378783	-0.85889	-0.31676	-1.10547	-0.36336	-0.676557	-9.54225	-4.98883
TCGA.DK.A1AD.01	-0.206577	0.112916	0.15185	-0.98564	-0.449443	0.310626	-0.77282	0.362638	1.11521	-0.852364	-0.248021	-0.932682	-0.0517146	-0.485967	-0.221535	-0.567269	-0.33037	-0.315163	-0.261732	-1.0305	-0.772745	-1.24038	-0.964827	-0.819283	-0.615591	-0.23461	-0.787367	0.481267	-4.14287	-3.27047
TCGA.XF.A9T8.01	0.117333	1.76304	1.55554	1.81087	1.15063	0.108435	0.971045	1.36974	1.23467	1.72533	0.791808	0.511322	0.689553	2.22841	1.35888	0.331938	1.61429	0.541589	0.043635	1.38795	1.19961	1.94625	0.505901	1.51221	0.979692	0.9306	0.910541	0.459653	16.0096	9.50561
TCGA.C4.A0F6.01	-0.429445	-0.205732	-0.235582	-0.534869	-1.13609	-0.439544	-0.688113	0.557196	0.0937769	-0.697456	0.433606	0.111156	-0.198033	0.79997	-0.590984	0.174917	-0.377972	0.0815439	-0.65634	-0.235712	-0.385277	-0.550563	-1.13866	-0.65777	-0.142157	-0.441943	-2.90498	-0.820442	-5.9098	-3.77597
TCGA.DK.AA6U.01	-0.772173	-0.453026	-0.538866	-1.20844	-0.232036	-0.32637	-1.27971	-1.00267	-1.18469	-1.1158	-1.86034	-1.01379	-0.869381	-1.10939	-1.03455	-1.40966	-0.930058	0.325536	-0.153362	-1.03641	-1.4205	-0.00590708	-0.763695	-1.25973	-1.30493	-1.0021	-0.845163	-0.634201	-11.3194	-6.06389
TCGA.CF.A9FM.01	-0.408513	-0.810008	-0.628844	0.589232	0.265042	-0.0897998	-0.213389	-0.440252	0.128676	-0.048099	0.504677	-0.350466	-0.649619	0.417896	-0.0404568	-0.577258	-0.393733	-2.34713	0.957105	-0.504866	-0.759597	0.5063	-0.740287	-0.665145	-1.01206	-0.589913	1.60769	-1.76588	-1.40433	-2.77111
TCGA.E7.A7DU.01	-1.11043	-1.41554	-0.443639	-1.65959	0.295583	1.10679	0.0657526	-0.742395	-1.31283	-0.972568	0.404238	-0.501893	-0.972534	-1.99192	-0.734704	-0.613071	-0.558254	-1.60235	0.168063	-0.822916	-1.33712	-1.04408	-1.33373	-1.03924	-0.533652	-0.915867	-1.30984	-1.26146	-10.571	-6.8566
TCGA.UY.A9PA.01	-0.332359	0.466748	0.228471	0.31927	1.35947	-0.315311	-0.0277407	-0.104407	-0.436992	0.981431	1.39877	0.226436	0.170765	0.707717	-0.069383	0.0177636	-0.272105	-0.34258	0.35872	0.304647	0.00164378	-0.436949	-0.676003	0.0307924	-0.5352	-0.400539	-0.0538339	0.658543	2.63817	-0.372698
TCGA.FD.A3SJ.01	0.496707	-0.414562	-0.572561	-0.805313	-0.465148	-0.322474	-0.362391	0.0745707	0.258266	-1.08775	-0.579494	-0.568582	-0.0531594	0.958487	-0.0174196	0.171143	-0.682695	-0.745689	-0.909684	-0.538528	-0.616309	-1.36407	-0.905762	-0.299733	-0.385629	-0.288926	-1.51409	0.688406	-6.33274	-1.94526
TCGA.CF.A47X.01	-0.202306	-1.76449	-0.543292	-1.07114	0.737761	-0.785974	-1.02727	-1.0341	-0.363427	-0.821299	0.317859	-1.32975	-0.615898	-1.66945	-1.60979	-0.538335	-1.32782	-0.642718	0.328532	-1.55843	-1.3957	-0.537404	-1.48261	-0.883416	-1.48114	-1.34045	1.00142	-1.36035	-9.1804	-9.65682
TCGA.GV.A40G.01	-1.35058	-0.86967	-0.965258	-1.05852	-0.615749	0.211622	-0.754318	-0.814611	-0.754849	-1.22425	-0.782673	-1.28966	-1.26913	-1.47623	-1.00025	-0.799222	-1.02787	-1.2892	-1.07989	-0.96311	-1.49196	0.0195449	0.204821	-1.36947	-1.19389	-1.1763	-0.00277422	-1.46301	-10.6914	-5.90083
TCGA.2F.A9KO.01	0.508342	1.37299	1.31272	0.579123	0.548931	1.18717	1.28077	1.36768	0.732184	1.16131	1.17534	0.519559	0.891549	-0.480273	0.200032	0.544948	0.751802	1.56477	-0.758131	0.880398	0.863762	-0.763501	-0.39101	0.388586	0.145104	0.701855	-0.18946	0.606679	10.6123	1.49948
TCGA.HQ.A2OF.01	-1.02495	-0.668747	-1.6257	-1.92447	-0.0187466	0.308982	-1.28101	-1.20215	-1.10773	-2.32404	-1.17358	-0.718188	-1.69077	-1.02429	-1.17871	-0.899917	-1.84677	0.726085	0.509999	-1.96946	-1.14436	0.0260221	-1.62656	-1.09903	-0.770297	-1.11169	0.07886	-2.35468	-13.9752	-8.44035
TCGA.DK.AA71.01	-0.737365	-0.883652	-0.339167	-0.177245	0.477575	0.326576	-0.888316	-0.652586	-0.636469	-0.457697	-0.899264	-0.417805	-1.17321	-0.469599	-0.709832	-1.23505	-0.416427	-1.29613	0.76434	-0.838175	-1.29959	0.230565	0.00128593	-0.774825	-0.565167	-0.411508	0.736019	0.957974	-5.37081	-0.854282
TCGA.UY.A9PH.01	0.650873	1.17779	1.42544	1.35473	0.324682	-0.663821	1.60206	1.1551	0.401126	1.06889	1.4322	1.94867	1.19394	0.929874	1.05486	0.82595	1.77558	-0.898677	1.44251	0.558697	0.55907	-0.238971	0.633525	1.15366	1.61023	1.30509	1.09876	0.652591	12.0314	5.2973
TCGA.XF.A8HF.01	-0.407374	-0.186283	-0.083867	-0.0881019	0.468508	0.162343	-0.107599	0.196722	0.608946	-0.317025	-0.285803	-0.234569	-0.581814	0.0690132	-0.353024	-0.913865	-0.0840987	-0.0223	0.0201773	-0.327293	-0.433612	-0.874912	-0.507646	-0.660698	0.0513887	0.167431	0.0567319	-0.29834	-0.045441	-2.54736
TCGA.CF.A5UA.01	-0.791286	-1.22505	-0.34293	-0.765718	0.994585	-0.100476	-0.781931	-1.40381	-0.780482	-0.723304	-0.513659	-0.891745	-1.14019	-1.64829	0.232741	-1.14514	-0.800091	0.0389378	0.436731	-0.836443	-1.19527	-1.09978	-1.24552	-0.758205	-0.448108	-1.46415	-0.792666	-1.35273	-9.31718	-6.77236
TCGA.XF.A9T3.01	0.738364	0.104205	0.19688	0.435732	-1.34674	-0.664836	0.301888	0.116193	0.166992	0.785233	-0.704737	0.443519	0.694961	-0.253777	0.178836	0.216834	0.162518	0.412714	-0.513126	1.11867	0.427999	0.23868	0.652049	0.626772	0.776714	0.628257	-1.10948	0.452277	1.82583	1.39252
TCGA.XF.A9SL.01	2.74118	-0.0885695	0.798138	1.16514	-1.34112	0.963947	1.27008	1.946	1.48533	1.26923	0.893482	0.800407	1.87999	-0.0287202	1.52463	2.82783	1.15619	0.961194	2.28439	1.27137	0.900631	0.286053	2.28786	0.907492	1.5663	1.90832	0.0700746	0.266204	10.6546	7.0758
TCGA.CF.A47W.01	-0.711064	-1.63256	-0.474336	-1.49663	0.239694	0.35998	-0.212099	-1.08581	-1.31616	-0.988211	-0.959665	-0.761372	-1.07307	-1.22765	-0.456191	-1.12974	-1.02038	-1.50858	1.00037	-1.41622	-1.34739	-1.12544	-1.6151	-1.24595	-1.34978	-1.04368	-0.234779	-1.3771	-11.0082	-7.70782
TCGA.GC.A3RD.01	-0.992337	-0.971205	-0.826789	-0.763509	0.437182	-1.30998	-0.924417	-0.212549	-1.6517	-0.698298	1.19202	1.25409	-0.868658	0.182882	-0.957857	0.337488	-0.324294	-0.347278	-1.19508	-0.782034	-0.92229	-0.291956	0.242374	-0.339736	-0.112467	-0.632756	-0.83104	-0.796655	-8.7794	-3.59523
TCGA.HQ.A5NE.01	-0.0797232	0.928973	-0.970425	-0.401683	0.16921	0.428964	0.720655	0.382928	-0.0965057	0.0370457	0.841352	-0.0939259	-0.426698	0.307492	-0.0592248	-0.132452	-0.0750406	0.51835	-0.396398	1.1435	0.63554	1.31006	0.582651	0.565519	0.221924	0.433875	0.966864	1.18603	3.94997	4.24645
TCGA.FD.A3N5.01	-0.258904	0.262369	-0.281988	-0.529395	1.66289	-0.998241	0.601914	0.117225	0.641368	0.488956	-0.985573	0.820362	-0.132597	-0.505098	-0.348224	-0.0676739	-0.00396357	1.12383	-0.855098	0.908752	0.422448	2.18392	0.436647	0.568695	0.795098	-0.416528	-0.244389	1.7218	3.63362	2.87162
TCGA.E7.A3Y1.01	-0.135695	-1.95314	-0.359592	-1.57481	-0.820075	-0.502677	-0.133166	-1.33971	-1.43604	-0.759431	-0.114961	-0.626071	-0.553123	-1.44937	-0.0721029	-0.665562	-0.533764	-0.836308	-0.461018	-0.724404	-1.43645	-1.25715	-0.892463	-1.38768	-0.969365	-0.846526	-0.0739653	-0.85967	-11.4573	-6.95487
TCGA.4Z.AA81.01	-0.318394	1.28757	1.13279	0.949243	-0.528936	-1.16987	-0.777258	-0.241927	-0.861911	1.17821	-0.62776	0.00600948	0.188861	-0.820131	-0.886852	-0.74186	0.0636843	-0.481785	-0.448504	-0.0915224	-0.18103	-0.353614	-0.168662	-0.105007	-0.144766	0.152496	0.875836	1.1065	2.89357	-2.33395
TCGA.G2.A2EC.01	0.397221	-1.20264	0.114363	-0.346196	0.284794	0.632744	1.35073	0.484531	0.287508	0.144613	-0.470821	-0.0212167	0.158004	0.432702	0.242508	0.240551	-0.272328	-0.813422	1.53781	0.280906	-0.118577	-0.787218	0.809415	-0.143678	0.179407	0.255839	0.477302	-0.657339	2.01318	0.256806
TCGA.K4.A5RJ.01	0.542791	2.09724	2.70304	2.09514	0.517737	-0.413657	-0.0561766	1.29775	0.633088	1.74687	-0.502338	3.19374	1.32166	1.41708	2.15107	0.473724	2.2627	0.653266	0.922098	0.811448	1.57549	0.416278	1.69254	2.16797	2.36571	1.57859	1.25012	2.26849	15.3549	11.1122
TCGA.CF.A5U8.01	-0.587655	-2.43546	-0.664652	-1.31167	-0.0422166	0.602049	0.0329454	-1.00796	-1.36989	-1.10659	-0.398303	-0.753545	-1.01794	-0.548847	-0.956307	-1.26578	-1.43634	-1.59443	0.708076	-1.08346	-1.15118	-1.14066	-1.45688	-1.36779	-1.08777	-1.18339	0.0437111	-2.0072	-10.8443	-8.30476
TCGA.K4.A3WS.01	0.640023	0.323907	0.176271	0.463888	0.194542	-0.137164	0.626623	0.965287	1.47733	0.526281	-0.587495	-0.251577	0.555609	0.122083	0.526947	0.838557	0.680809	0.195522	0.42757	0.852848	0.752945	-0.244783	0.509748	0.40076	0.928465	1.10697	-0.340506	0.334599	7.12639	2.193
TCGA.XF.A9SW.01	0.811588	-0.424444	-0.577919	1.12811	-2.05378	0.570639	0.789438	1.71609	2.15547	0.867941	0.593468	0.837923	0.757467	1.05393	1.6717	1.75607	0.8988	0.974603	-0.528295	1.79875	1.16559	0.778705	2.31308	1.08466	1.38102	1.15131	-1.21385	1.82682	6.40101	9.88524
TCGA.DK.AA6W.01	-0.402713	0.0913737	-0.746282	-0.0412414	0.586745	-2.24837	-0.834834	-1.17614	-0.886385	-0.770259	-1.30004	-1.04545	-0.418609	-1.02598	-0.297116	-1.19539	-0.331914	1.30631	-2.03498	-0.384172	-0.315724	-1.39903	-0.814524	0.122343	0.0479545	-1.49077	-1.668	0.426768	-7.63569	-5.31946
TCGA.DK.A3IS.01	-1.13321	0.0244183	-0.273949	-0.571746	1.23216	-0.547188	-0.504957	-0.791628	-1.24987	-0.354578	-0.660278	0.193794	-0.677955	-1.20439	-1.23418	-1.29603	-0.771836	0.106392	-0.193337	-0.150579	-1.07969	-1.18186	-0.333759	-1.10653	-1.14799	-1.22255	-1.41906	0.991348	-6.36202	-5.3884
TCGA.GV.A3QG.01	3.62565	2.03515	2.25401	1.80665	0.173699	1.28223	1.05425	1.56141	3.08661	1.90816	1.50351	1.84436	3.09954	0.260493	1.8085	1.451	1.78908	2.29131	2.18812	1.48594	1.39196	0.39836	2.4345	1.86474	2.38851	2.50708	-0.695237	0.888595	16.6868	10.292
TCGA.G2.A2EO.01	0.298746	1.2148	1.81323	0.719453	1.60516	1.03081	0.772308	1.30225	-0.0449727	0.624877	1.14233	1.63499	0.264137	0.518385	0.864836	0.371113	0.505009	-0.598013	0.225805	0.423946	0.156188	-0.856294	-0.524531	0.729121	0.128297	0.84524	-0.672342	1.28626	8.76013	3.5536
TCGA.XF.A9T0.01	0.0858311	0.216677	0.1576	-0.259043	-0.664745	-0.583939	-0.358653	0.261355	-0.604172	-0.242902	-0.834934	0.444481	0.284424	0.307804	-0.207549	-0.372293	0.24807	-0.291046	0.656733	-0.836079	-0.525087	-0.813717	-0.127633	-0.0370938	0.269686	0.225764	-1.34062	-1.25987	-3.9699	-2.47393
TCGA.FD.A5BU.01	1.36685	0.289246	0.266369	0.211926	0.65668	-0.859219	0.714612	0.684771	-0.233143	0.696453	-0.792557	0.152874	1.06867	1.82819	0.765709	0.117883	0.897827	1.06488	-0.519744	1.15649	1.34985	0.869725	0.567987	1.07678	0.737223	0.663056	-0.481971	1.44924	5.97434	6.59624
TCGA.GV.A3JX.01	-0.40812	0.535588	-0.258233	0.816534	-0.0825577	0.517178	0.113755	-0.33388	-0.382083	0.0967909	-1.027	0.820907	0.147938	0.277495	0.0173879	-0.805923	-0.0208538	0.695365	-0.742091	0.446137	-0.553309	-0.11757	0.160709	0.23025	-0.239862	-0.124476	-0.258693	0.660252	0.015572	1.72485
TCGA.FD.A62S.01	0.476318	0.535773	-0.214353	0.552728	-0.0646523	1.21673	1.44097	1.59838	0.266162	0.910562	0.0502487	-0.334513	0.776247	-0.189422	1.13273	-0.0688503	1.11091	1.57204	0.230198	1.04128	1.15402	0.402725	1.31096	1.46097	1.04552	0.952381	-0.976741	-0.185387	7.19651	6.26022
TCGA.BT.A2LB.01	0.0917752	0.773422	-0.0292031	0.432174	0.900779	0.696314	0.82856	0.779143	-0.285808	0.212576	1.65903	0.82991	0.179673	0.330102	0.292137	0.5704	0.61944	-0.030287	1.23966	0.563162	0.190445	0.590922	1.01195	0.0946498	0.301926	0.754187	0.823896	-0.165642	5.94333	3.46987
TCGA.FD.A6TI.01	-0.848084	-1.16001	-0.443561	-0.21751	-1.42377	0.342953	0.277615	-0.128395	-0.531475	-0.034828	1.19023	-0.967593	-0.61377	1.66571	-0.038955	1.02004	-0.647142	-0.975252	0.180941	-0.450524	-0.239326	0.0859717	0.264847	-0.530313	-0.0617804	-0.207326	1.27546	0.519468	-3.28366	1.66254
TCGA.XF.AAMJ.01	0.0853281	-1.16879	-0.376658	-0.183714	0.0210981	-1.06993	1.15218	0.874018	0.642269	0.0517478	-0.259588	-0.650704	-0.295879	0.296739	0.457703	0.42629	-0.0433617	0.115033	1.29105	0.658989	0.37575	-0.707862	0.74127	0.417334	0.844634	0.139257	-0.496576	-0.617138	1.68957	-0.525247
TCGA.XF.A9SZ.01	-0.485965	0.179161	-0.317999	0.601122	-0.0257243	1.83116	0.0349292	0.951855	0.412361	0.456603	-0.630634	1.14722	0.15779	0.174113	0.872978	1.22599	0.774454	-0.45769	0.168678	0.337064	0.304974	-0.00365032	0.0249887	0.450751	0.465664	0.372972	1.55724	-1.68632	4.86455	2.43848
TCGA.CF.A9FL.01	-0.191834	-0.439349	-0.658575	-0.719843	0.745232	-0.117479	0.622802	-0.0865156	0.195465	-0.49819	-1.13546	-0.386261	-0.378765	0.340957	-0.0980754	-0.0286052	-0.774214	0.963393	1.90843	-0.616498	-0.526171	-1.0201	-0.498824	-0.607192	-0.160321	0.0676755	-1.36321	0.0202755	-3.27718	-2.75465
TCGA.ZF.A9RD.01	1.73741	1.50052	1.68098	0.883615	1.01714	-0.689881	1.14767	0.729467	0.732555	1.36112	0.806837	1.75905	1.42404	0.198812	0.993339	1.33308	1.26387	0.770264	-0.812735	1.26997	1.29474	2.6761	0.970402	1.33439	1.02231	1.06781	2.00184	0.942657	14.6856	7.0136
TCGA.GD.A3OS.01	-0.186679	-0.563652	-0.962148	0.123161	-1.70299	-1.76445	-0.181357	-0.352693	0.765626	-0.259703	-1.44791	0.128974	-0.888832	-1.01318	-0.120753	-0.565891	-0.277607	0.647344	-1.65771	0.658253	0.920016	-0.269393	0.797853	0.116837	-0.681665	-0.616021	-0.873064	-0.87033	-3.04458	-3.40102
TCGA.K4.A54R.01	-0.338139	0.936734	1.55979	0.450382	-0.323406	1.1883	1.1155	0.918982	0.237614	0.674521	0.0721459	1.31768	0.368952	0.995917	0.864267	0.562476	0.831927	0.329581	-0.0237538	0.35389	0.741914	-0.736016	0.938179	0.653469	0.282111	0.829769	0.875771	0.0950385	8.37146	4.83108
TCGA.FT.A3EE.01	-0.228993	0.046197	-0.704009	-0.355243	0.538481	-0.678532	-0.243811	-0.332496	-1.0215	-0.804461	0.723859	-0.435087	-0.370604	0.228648	-0.289598	0.0614919	-0.827332	0.00636106	0.0591161	0.0517824	-0.524713	0.237078	0.141532	0.314063	0.293597	-0.138013	0.263927	-0.419266	-3.22386	-1.29341
TCGA.FD.A43P.01	0.862067	1.72525	1.96266	0.808234	-0.809471	1.83848	0.721364	0.0309737	0.288686	1.03381	0.381646	-1.05012	0.948971	-1.63988	0.0945341	-0.0679258	1.0804	0.670092	0.678574	0.646805	-0.0107518	-0.227858	-0.54273	-0.057144	0.801499	1.27871	0.623302	1.16506	8.29957	1.71086
TCGA.XF.A9SJ.01	0.272113	-0.355305	1.09498	0.914409	0.236278	1.47983	-0.0187128	1.59608	-0.0970422	0.613062	-1.36433	2.27908	0.415877	0.0336096	1.12495	0.640045	1.13475	0.0698269	0.208129	1.50778	0.771172	0.347582	0.495473	0.946202	0.741569	1.17308	0.876148	-0.385976	8.31193	5.17642
TCGA.K4.A5RH.01	0.974567	2.12886	2.3825	1.47494	-0.971026	0.522909	0.877392	1.41793	2.308	2.00124	0.555492	1.83264	1.31322	-0.496897	2.37317	0.582237	1.76111	1.26484	0.429696	1.1275	1.83365	0.428467	1.0133	1.79622	1.83088	1.93529	-0.315286	0.360124	15.3804	7.38523
TCGA.R3.A69X.01	0.863508	0.18768	-0.0310169	0.928525	-0.605289	0.233732	1.42117	1.61802	0.547578	0.30876	-0.129948	0.785154	0.677986	2.7267	0.492199	0.670725	0.575043	0.226998	2.11081	0.386547	0.510159	-0.352344	1.05676	0.684364	1.12521	0.854564	0.233129	1.16055	6.35983	5.8503
TCGA.UY.A78K.01	2.44034	1.22668	1.63694	0.609668	-0.803247	0.467238	0.624708	0.725286	0.541647	0.780485	-0.583869	-0.170786	1.99195	-1.4929	0.255536	-0.130625	0.981673	1.15763	0.157393	0.365802	-0.274232	-0.400502	0.377571	0.394259	0.311864	1.48812	-0.735224	-0.367172	6.18664	0.215704
TCGA.CU.A3QU.01	-0.902509	-0.375308	-0.95222	-0.403318	0.187294	-1.41202	-0.733633	-0.211936	-0.631566	-0.0866151	-0.116252	0.404595	-0.553951	-1.3996	-0.75615	-0.591143	-1.38837	-1.04001	-0.781505	-0.0619672	-0.579083	0.25282	-0.374554	-1.35898	-0.946219	-0.789226	0.770074	-0.44815	-3.86751	-6.88501
TCGA.FD.A3B8.01	2.24357	1.27069	1.51569	1.7755	-0.0530478	-0.51395	0.871184	2.81624	1.60873	1.856	1.63528	1.61155	2.09008	1.2737	2.19	2.56607	2.13821	1.25172	0.573267	2.24251	2.03503	1.77503	1.74361	2.11747	1.99876	2.61823	0.608044	1.42309	17.4528	11.7015
TCGA.DK.A3IV.01	0.99727	1.14492	0.60768	0.90361	-0.218309	0.088712	0.938758	-0.551084	0.286005	0.61608	-0.869101	-1.33087	1.53027	-1.55479	-0.433681	-0.240963	0.107371	0.181655	0.896688	0.0520165	-0.333249	-0.113628	-0.517032	-0.477304	-0.466867	0.435355	0.0460265	-0.205102	3.92781	-3.10545
TCGA.GU.A762.01	0.754918	1.4783	2.84355	1.37454	1.47422	0.350967	1.34715	0.290745	0.143484	1.80189	-0.39801	0.736692	1.357	0.255895	2.0803	0.055849	1.40327	0.79217	0.295281	1.47046	1.81437	0.706595	1.23636	2.02798	1.56955	1.58596	-0.938256	0.70561	13.8429	8.6587
TCGA.XF.AAMX.01	-0.394074	-0.533892	-0.851525	-0.420288	-2.47747	0.633167	-1.85048	-1.40933	-0.222295	-1.09825	-0.21882	-1.05187	-0.123587	-1.26383	-0.710496	-1.22712	-0.801892	-1.34227	0.0442702	-0.867895	-0.757332	-0.288479	-1.4183	-0.502305	-0.201642	-0.28408	-0.055799	-0.999857	-10.3512	-5.35199
TCGA.CF.A1HS.01	-0.150054	0.721673	-0.630524	0.856023	1.26703	-0.326128	0.308614	0.650447	-0.392176	-0.056031	0.437734	0.752116	0.199997	0.942073	0.370281	-0.41487	0.458776	1.48047	-0.992903	-0.257316	0.435976	1.10132	-0.535528	0.479939	0.882919	0.0794297	-1.07198	0.803304	1.91117	3.29404
TCGA.GU.A42R.01	-1.05707	-1.07679	-1.13989	-1.67939	-0.379318	-0.0688401	-0.893677	-1.05319	-0.825419	-1.19619	-0.177011	-1.04399	-1.19136	-1.82471	-0.885917	-0.491532	-0.751341	0.797373	-0.961498	-1.1403	-1.25683	-0.0415212	-0.955802	-1.25673	-0.831427	-1.20914	-1.1632	0.53545	-13.0133	-5.24941
TCGA.YC.A8S6.01	0.00689811	0.187191	-0.35303	0.567729	0.186452	0.582964	1.34249	1.34963	0.967844	0.612914	2.52157	0.213862	0.132841	0.238542	1.17455	2.26937	0.471843	0.431414	1.25623	1.66903	1.12642	0.989091	1.43717	0.836185	1.38425	1.01666	1.58582	1.09764	10.2592	6.82799
TCGA.ZF.AA4W.01	-0.274233	-0.0935677	0.0510892	-0.104341	0.582277	0.0726261	-0.0693401	-1.40264	-0.137786	-0.358351	-1.14102	-0.966338	-0.668242	1.06267	-1.04526	-1.16769	-0.300394	-0.437063	-1.1212	-0.807939	0.115327	1.62841	-0.769083	-0.554852	-1.26049	-0.259841	-0.00179532	0.142914	-2.48691	0.237028
TCGA.BT.A42E.01	0.184378	1.92932	1.37453	1.35561	0.816328	-0.108223	0.82312	-0.469953	0.0496669	0.818545	0.588751	0.194282	0.789681	0.505757	0.479963	-0.418649	1.31965	0.187397	-1.64934	0.345846	1.00107	0.724493	0.756158	1.26951	1.04052	0.587392	1.08101	1.80712	9.71247	6.75442
TCGA.E7.A7PW.01	-0.923573	-0.557617	-0.361137	-1.08861	-0.204191	2.13468	-1.09853	-1.18617	-0.286423	-1.08704	-0.486301	-1.41229	-1.1289	-1.67624	-0.661394	-0.90268	-0.884476	-0.963902	0.58729	-1.89726	-1.70421	-1.2091	-0.672977	-1.80574	-1.38029	-0.638742	0.559474	-0.499858	-9.55046	-5.40979
TCGA.BT.A20U.01	-0.445558	-0.188622	-0.493307	0.346071	-0.190477	0.786294	0.0361163	-0.465402	-0.257293	-0.064726	-1.63226	-0.467978	-0.389267	0.674104	-0.430265	-0.884295	-0.0943536	1.477	-0.224156	-0.278721	0.0726334	-0.0913494	-0.0536663	0.0731956	-0.310118	-0.241111	-1.79577	0.765504	-3.52061	1.62946
TCGA.GU.A764.01	1.06917	0.617431	0.690393	0.910062	0.413148	-0.63798	1.34118	0.400477	0.3806	0.883501	0.907652	0.772138	0.844462	0.849716	0.933214	0.704412	1.16159	-0.683968	-0.267467	0.557172	0.96137	0.45553	1.18356	0.736835	0.671214	1.04099	0.122286	0.510127	8.31862	5.1926
TCGA.ZF.AA4R.01	-0.557061	-0.46832	-0.957613	-1.32983	-0.195064	0.0491627	0.513124	-0.069389	0.052904	-0.379638	-0.0962541	-0.682783	-0.788581	0.776794	-0.261428	-0.0980963	-0.567791	-0.0707299	-1.85155	0.824779	0.188929	-0.908668	-0.256813	-0.714025	-0.303597	-0.0190651	-0.2979	0.490812	-2.13708	-1.39196
TCGA.CF.A8HX.01	-1.09825	-0.985498	-1.16752	-1.14793	0.0838713	0.666632	-0.453907	-0.935306	-1.55219	-0.902159	0.776633	-1.33238	-1.2917	-1.22333	-0.430445	-1.67309	-0.907645	-1.27523	-0.528504	-1.38713	-1.3812	-1.32725	-0.901663	-1.54258	-1.30743	-1.74191	-0.112233	-2.13008	-11.6831	-7.66629
TCGA.E5.A4U1.01	-1.14948	-1.25132	-0.703474	-2.18433	0.273323	-0.412701	-1.08534	-2.0673	-1.07759	-1.48909	-0.363464	-1.14089	-1.87867	-1.07208	-1.35104	-1.72019	-0.93713	-1.0392	0.357621	-2.8616	-1.92034	-1.17834	-1.94894	-1.53218	-1.96294	-2.24216	-0.431947	-1.20708	-15.6858	-9.6395
TCGA.FD.A3SN.01	-0.319918	-0.345633	-0.0813441	-0.275058	-0.452698	0.869942	-0.236128	-0.0993475	-0.409416	0.0965324	-0.0117784	0.903669	-0.284689	-0.857582	-0.474167	-0.484639	0.0463446	0.501753	-0.757881	0.552811	0.466416	-0.272432	0.117042	0.245415	-0.463624	-0.00487261	0.6119	0.231323	-0.176838	-0.0941147
TCGA.4Z.AA86.01	0.448978	1.64378	1.52073	1.08539	0.215832	-0.941878	0.771341	1.64117	-0.195512	1.33218	0.03621	1.92297	1.0508	1.00426	1.27243	0.974835	1.55108	0.499849	-0.503362	1.18757	1.64	0.468985	0.282053	2.07576	1.34616	1.40477	-0.0991573	1.4789	12.1481	7.11582
TCGA.CF.A47V.01	-0.277408	-1.65887	-0.682265	-0.558465	0.798933	0.658215	0.817988	-1.0983	0.561794	-0.208535	0.465389	-0.759795	-0.393939	0.238333	0.0110766	-0.303766	-0.561518	-1.33209	0.77968	-0.0492276	-0.359026	-0.0731326	-1.18616	-0.932178	-0.303437	-0.722784	0.915258	-0.509564	-2.2435	-2.35493
TCGA.FD.A5BR.01	1.44192	-0.143679	0.021014	0.248721	0.844253	-0.102316	0.429803	-0.183291	0.998916	0.280292	1.60899	0.344347	0.891101	0.439244	0.488063	0.486689	0.607752	0.492061	1.34826	0.20539	0.524946	-0.0205556	0.628002	0.0697609	0.385635	0.845791	0.243047	0.0316929	4.3152	2.14164
TCGA.GV.A3QF.01	-1.09646	-0.590288	-0.799757	-0.592701	-0.510184	-0.332986	-0.999014	-1.12757	0.66096	-1.72502	0.379141	-1.08394	-0.403549	0.751901	-0.490485	0.0826594	-0.892268	0.0779778	0.301582	-1.68222	-0.957115	-0.123104	-0.627588	-1.20533	-0.878105	-1.46942	0.314868	0.655077	-9.47747	-2.26479
TCGA.XF.AAN4.01	1.04834	0.00635757	0.183944	0.721791	-1.5252	-1.5267	0.686814	1.87235	1.7626	1.57573	0.987188	0.799111	1.38545	2.24254	2.36587	3.20125	1.66062	0.27292	-0.279372	1.31223	1.64011	1.47281	2.34475	1.93529	1.62893	1.63758	-1.14393	2.17249	8.73038	11.542
TCGA.XF.A9ST.01	-0.620178	-0.00133231	-0.72016	-0.825689	-0.671464	-1.3311	-2.10026	-1.70242	0.921364	-1.66972	-0.348022	-0.794217	-2.08684	0.209287	-1.92399	-1.14392	-1.8769	-1.60172	-2.30678	-1.68664	-1.28036	-1.77462	0.35576	-0.948669	-0.403648	-0.997644	-1.88683	0.677999	-12.5209	-6.61224
TCGA.GV.A6ZA.01	-0.730997	0.238569	0.459031	-0.602492	1.11795	0.473092	-0.432153	-1.47864	-1.631	0.246955	-0.164175	-0.0302907	-0.519677	-0.840902	-0.597365	-0.938963	-0.681215	-0.295414	-0.18752	-0.987026	-0.431067	-0.915718	-1.37542	-0.66952	-0.952084	-0.833528	0.605977	-0.340237	-3.72743	-4.94728
TCGA.PQ.A6FN.01	0.84581	-0.350189	0.232957	0.152416	0.774136	0.432684	0.362706	0.0471473	-1.00431	-0.128027	-0.791425	0.311556	0.193888	0.0260204	-0.345107	-0.347299	0.269385	1.26069	-0.188425	-0.233021	0.548015	0.910964	-0.0321558	0.148461	0.228662	-0.168285	-0.141571	-0.891529	0.0919731	0.518722
TCGA.XF.A9T6.01	-0.126652	0.849119	-0.0206654	0.292063	0.478442	-0.409711	-0.48305	-1.1864	-0.65408	-0.128423	-0.735901	0.433758	-0.19828	-0.322639	0.44815	-0.119837	-0.293369	-0.969889	-1.12481	0.107046	0.369378	0.813356	-0.543034	0.386472	-0.392197	-0.21035	0.390298	-0.807022	-0.196626	-0.727797
TCGA.CF.A3MG.01	-1.28019	-0.626997	-0.935725	-1.42414	1.2958	-0.129709	-0.772394	-0.528425	-0.762034	-1.48586	-0.238604	-0.628997	-1.31374	-0.346173	-1.59738	-1.11187	-1.40056	-0.127598	0.538815	-1.61336	-1.5164	-0.93932	-0.807392	-1.06043	-1.13741	-1.58026	-0.11861	-0.635945	-10.0684	-6.91692
TCGA.ZF.A9RE.01	-0.749533	-0.241987	-0.921878	-0.264553	0.545175	-0.17065	-1.02822	-0.67342	-1.13497	-0.853315	-1.46736	-0.579857	-0.858884	1.64577	-1.55128	-1.63481	-0.680922	-1.14517	-1.03113	-0.735916	-1.04263	0.554875	-0.437455	-0.815639	-1.37273	-1.316	-0.161613	-0.133125	-7.82932	-1.58843
TCGA.DK.A1A5.01	-0.635869	-0.0890795	-0.359946	0.376699	0.159355	0.00958585	-0.000443849	0.695588	0.295242	0.620332	-0.390312	1.13625	-0.197212	0.784916	-0.239092	-0.238059	-0.113562	0.697544	0.572967	0.686749	0.514999	-0.75633	-0.107371	0.141166	-0.0220099	0.0677898	-0.223337	-0.423523	2.74395	-0.704211
TCGA.ZF.AA56.01	0.861795	0.250818	-0.317431	0.588055	0.68643	0.610309	0.891221	1.15303	0.20202	0.661789	0.0537231	1.69578	0.652924	0.921201	0.466006	0.704428	0.780003	0.49224	0.755921	0.794269	0.598238	1.04891	0.468389	0.637783	0.409241	0.445816	0.557917	1.10994	6.51217	6.04254
TCGA.GU.A767.01	-0.607401	-0.910932	-0.61538	-0.900719	0.192297	0.525771	-0.50126	-0.496233	-0.34949	-0.281952	0.652094	-0.638422	-1.12908	-2.446	0.231592	0.0262124	-0.85046	-0.438242	-0.041931	-0.346897	-0.881241	-0.290581	0.4392	-0.668992	0.134883	-0.266962	-0.833617	0.362576	-6.19239	-2.25089
TCGA.GC.A3WC.01	1.4726	1.248	0.957285	0.757636	0.364029	-0.436747	0.41608	-0.194884	1.80688	0.971829	1.58859	0.101394	1.52135	1.18847	0.629815	0.401719	1.11214	0.753863	-0.456751	0.747012	0.783121	0.314554	0.193836	1.05532	0.719287	0.594246	-0.833314	0.351701	7.61792	4.40909
TCGA.4Z.AA7N.01	4.33153	1.30798	1.83103	1.20653	-0.443455	0.351904	1.91078	0.898513	2.13482	1.8267	3.18395	-0.694112	4.13964	0.417511	0.885117	1.69789	1.16598	1.79487	1.70092	1.04645	1.21993	-0.29862	1.4527	1.01076	2.2408	2.43185	-0.0497989	0.657953	14.7547	5.64331
TCGA.H4.A2HO.01	0.0879733	-0.44326	0.170111	-0.679182	-0.219247	-0.308264	0.102813	-0.311978	0.627947	-0.415866	0.911754	0.0551681	-0.382561	-0.579041	0.163324	0.293804	-0.464539	-1.09862	0.637351	-0.922591	-0.861776	-0.526578	-0.120451	-0.518455	-0.400251	0.126314	0.118173	-0.940282	-2.70854	-3.29429
TCGA.XF.AAMZ.01	1.0717	0.578338	0.00440321	-0.377562	-0.800296	0.139425	-0.398082	0.313302	-0.562596	-0.58587	-0.0842922	-0.609491	0.522506	-0.978233	-0.367368	-0.0176813	-0.219299	0.704513	0.231553	-1.2119	-1.21284	-0.431378	-0.682184	-0.545334	-0.116317	0.0378318	-0.53419	-0.114179	-4.74946	-3.19855
TCGA.2F.A9KQ.01	-1.3272	-0.803992	-0.918007	-0.963605	1.07561	-0.0539575	0.163847	-0.126833	-1.10475	-1.37383	-0.0476458	-0.417298	-1.00695	0.964124	-0.857168	-0.448584	-1.15464	-1.11274	-0.105711	-0.433406	-1.04884	-0.501625	-0.488646	-0.612454	-1.01921	-1.10427	0.028858	-0.444971	-6.60922	-3.14934
TCGA.4Z.AA7M.01	-0.758348	0.458595	-0.589443	-0.795239	-0.00748958	-0.531264	-0.368117	-1.27699	-0.588872	-0.964461	-0.923711	-0.742911	-1.06109	0.124204	-0.086633	-0.949341	-0.439841	0.093067	-0.944938	-1.2076	-0.556205	-1.31858	-1.64875	-0.969746	-0.873022	-0.700325	0.258648	-1.46786	-6.3375	-6.33847
TCGA.FD.A62O.01	-0.700935	-0.372701	-0.906296	-1.13224	-0.17527	0.198751	-0.654429	-0.201799	0.567401	-1.31116	0.0689207	-0.605409	-0.730889	-0.27375	-0.751806	0.551005	-0.95463	-0.264908	0.149021	-0.575753	-0.715415	-0.119964	0.0755897	-0.482956	-0.798864	-0.841743	0.2683	-0.465808	-6.05111	-2.77457
TCGA.FD.A3B5.01	-0.987375	-0.602013	-1.04869	-0.297128	0.733416	-1.24737	-0.0506566	0.662638	-1.52601	-0.552644	-0.33274	0.910025	-0.981946	0.167071	-0.963902	-0.508726	-0.414039	-0.0577845	-1.04229	-0.242288	0.188008	1.60367	-0.183775	-0.260372	-0.412331	-0.863034	0.28617	0.205616	-3.31223	-1.0931
TCGA.ZF.A9RM.01	-1.03923	-0.0640684	-1.25026	-1.60984	-0.882327	-0.602063	-2.83894	-0.939753	-0.452908	-1.20245	-1.27955	-0.730606	-1.09306	-1.33619	-1.55073	-0.829476	-1.52871	-0.410465	0.554844	-1.71077	-1.7002	-1.10936	-1.68055	-1.65408	-0.850345	-1.23789	0.868144	-0.403362	-12.1823	-9.86504
TCGA.FJ.A871.01	-0.89105	-1.20547	-0.749463	-0.378448	-2.53153	-2.02753	-0.290981	-0.949047	-1.29448	-1.05165	-2.24316	-1.05985	-1.29679	-2.21819	-1.12188	-1.3252	-1.50494	0.275768	-1.03378	-2.22408	0.161619	-0.622242	-0.15924	-0.537834	-1.48354	-0.880701	-2.19951	0.205995	-12.6386	-7.74014
TCGA.XF.AAMT.01	0.00665499	-0.582	-0.496889	0.843198	0.534412	-0.12364	1.57428	0.786032	-0.453025	0.0435259	-0.464055	1.5003	-0.00920615	0.392078	0.92171	0.378524	0.760646	0.655917	-0.591888	0.885173	1.255	0.448571	0.389713	1.38106	-0.00413812	0.18069	-0.915396	-0.106445	3.655	4.0637
TCGA.FD.A6TD.01	0.534582	0.486146	0.85118	1.34899	1.87278	1.29033	0.702543	0.894771	0.308656	0.938209	0.237559	0.869126	0.909105	1.10808	1.10517	1.1084	1.34432	1.20242	0.687239	1.08801	1.127	0.715711	1.04078	1.61311	0.894801	0.812882	-0.222281	0.741491	10.2089	8.95899
TCGA.UY.A78L.01	-0.34707	0.694167	-0.581543	0.488566	-0.495323	1.49816	0.367859	0.580899	-0.699253	-0.173185	-1.71041	-0.102772	-0.272276	0.139485	-0.132224	-0.381649	0.318738	-0.0735125	-1.21297	-0.381608	0.0693947	2.29391	0.956398	0.037717	0.0512892	-0.207773	0.288243	-0.591165	-0.0495589	4.22711
TCGA.ZF.AA4V.01	-0.262965	0.923753	0.741921	0.698814	-0.633088	2.21905	0.672805	-0.452407	-0.546484	0.580597	-0.96979	0.427438	0.101275	-1.15297	-0.126755	0.049207	0.502039	1.19395	-1.00428	-0.0674198	0.639745	0.98858	-0.414463	0.266067	-0.0953829	0.269586	1.27299	-0.0264579	4.10082	2.03603
TCGA.ZF.A9R7.01	1.13701	0.652645	2.1265	1.08923	0.406324	0.420268	1.3771	-0.157877	0.0247228	1.75387	0.670717	-0.442779	1.05623	0.793139	0.157645	0.872233	1.24575	-1.38952	-0.0794942	-0.166773	0.331082	0.0963486	-0.185898	-0.265023	0.435029	0.454103	2.40071	-1.12153	9.76443	1.14071
TCGA.GV.A3QI.01	-0.933251	0.361274	-1.35173	-1.40968	-0.987377	-2.16197	-1.57716	-1.12839	0.127276	-1.56098	-0.694325	-0.522924	-0.903108	-1.43179	-1.24935	-1.34085	-2.16441	-0.456177	-0.333058	-0.844319	-0.847999	-1.30765	-0.984922	-1.44986	-1.36882	-1.42782	0.758412	1.82408	-9.88849	-8.5995
TCGA.XF.A8HH.01	-0.29909	-0.555499	-0.344423	-0.351721	-0.532484	0.727089	-0.252239	0.726488	0.162251	-0.21817	0.225545	-1.02556	-0.185689	-0.856614	-0.443774	-0.740531	-0.14761	-0.0210275	-0.0743058	-0.355483	-0.45239	-0.887148	0.643347	-0.136581	0.689643	0.171995	0.033597	-0.925815	-1.96808	-2.02711
TCGA.GC.A3YS.01	-0.582538	0.30296	-0.0103728	0.394398	0.862795	-1.99878	1.23884	0.227458	0.48428	-0.144194	-0.105354	1.04044	-0.23515	1.1415	0.495542	0.185393	0.724866	0.498781	-1.38802	0.762461	0.73282	-0.332881	0.147676	0.826022	0.402166	0.432675	-1.05406	0.993613	4.23007	1.99756
TCGA.CU.A5W6.01	-0.691582	0.11868	-0.115503	-0.325747	-0.185637	0.649173	-0.959859	0.000539594	-0.599412	-0.068706	-0.817498	0.176809	-0.51802	1.6047	-0.382284	-0.737944	-0.150899	-1.30138	1.33811	-0.565308	-0.654158	-0.49173	-0.108191	-0.602325	-0.0693894	-0.438934	0.922384	0.206552	-2.87166	0.724996
TCGA.BL.A3JM.01	-0.542202	0.60091	-0.276374	-0.705306	-0.841825	-1.81143	-0.725402	-1.28456	1.2156	-1.35658	-0.78342	-0.486628	-0.330083	-1.3028	-0.907966	-1.06731	-0.926967	1.63712	-1.64279	-0.153967	-0.312007	-1.196	-0.138485	-0.277852	-0.453642	-0.811684	-2.83569	0.941018	-6.65119	-5.62049
TCGA.E5.A2PC.01	-0.778958	0.0934823	-0.168469	0.254815	0.977481	0.351101	0.380046	-1.47442	-1.52183	0.354801	-1.18439	-1.15785	-0.452969	-0.108376	-0.702833	-1.16608	-0.187545	-1.07562	-0.914489	-0.658372	0.289063	-0.229154	-0.136929	-0.387918	-0.672012	-0.811056	-0.326494	-0.645949	-2.61095	-2.0476
TCGA.FD.A5C0.01	-0.197486	-0.180328	-0.711352	-0.668681	-0.351065	-0.406664	-0.330419	0.671523	1.25033	-0.0760996	0.586573	-0.781795	-0.433317	1.04104	-0.287235	0.302247	-0.166719	1.29896	-0.489636	0.403724	-0.572932	-0.12051	-0.305292	-0.326913	0.226907	-0.0133239	0.349958	0.358395	-0.228668	-0.213895
TCGA.CF.A9FF.01	1.21444	0.16028	0.0784872	-1.10195	0.378414	0.438278	0.248046	-0.402041	-0.252558	-0.366973	1.01361	0.035292	0.708415	-0.365936	-0.36198	0.326725	-0.655667	-0.340347	1.02318	-0.622747	-0.347841	-0.644352	-1.06767	-0.866068	-0.568987	-0.0192779	0.661867	0.40491	-1.5863	-3.11849
TCGA.FD.A62P.01	-0.0635051	0.254524	0.571274	0.456081	-0.258725	1.54624	0.637217	1.52999	0.528429	0.444096	1.50646	0.492836	0.0856362	0.362606	0.884543	2.06964	0.936092	0.281501	-0.415418	0.498831	0.134452	0.32758	0.710256	0.852578	0.960452	0.920623	1.08306	0.496707	6.79985	6.1166
TCGA.G2.A3IB.01	-0.752855	-0.00836272	-0.920378	-0.168725	-0.35221	0.247982	-0.152126	-0.590878	0.466927	-0.500755	-0.918603	0.184361	-0.534448	0.0800684	-0.775489	-1.37121	-0.189147	0.0182578	-1.33317	-0.855341	0.163112	2.93524	-0.31981	-0.742819	-0.0962668	-1.03319	-0.100902	0.779741	-4.05283	1.08053
TCGA.XF.AAME.01	2.23372	0.923955	0.698118	1.74021	0.553761	-0.0410749	1.88554	2.46322	1.90527	1.54736	1.78746	2.32023	1.96829	1.59854	2.16489	2.12051	1.85639	1.46007	0.966438	1.39954	1.9206	1.49714	2.30854	1.84054	1.8133	2.0381	0.24742	1.26603	16.8218	12.0176
TCGA.FD.A43N.01	-0.253281	0.12671	-0.395494	0.197932	-0.951939	0.672894	-0.801926	0.169717	-0.473338	-0.580915	0.728282	0.0599225	-0.382345	0.0496553	0.0458932	0.648515	-0.35317	-0.356762	-1.14344	-0.154589	-0.260026	-0.137803	-0.012816	-0.206448	-0.160761	0.271102	0.610973	-0.421813	-2.24179	-0.363608
TCGA.GC.A3BM.01	-0.535961	-0.548777	-0.0951636	-0.354214	1.01659	-0.728396	-0.70305	-0.551997	-0.917278	-0.460715	0.529194	-0.0393267	-0.453865	-0.565066	-1.20697	-1.0387	-0.551147	0.771638	-0.26752	-0.0304123	-0.816381	-1.00713	-0.622212	-0.687376	-0.913819	-1.0701	-0.88386	-0.485594	-5.41536	-5.8539
TCGA.E7.A4IJ.01	-0.404078	0.168988	0.765885	-0.401618	-0.108842	0.25826	0.0931396	-0.762823	-1.10157	-0.121682	0.191829	-0.229776	-0.514961	-1.1869	-0.509888	-1.22589	-0.721999	-1.27407	0.631853	-0.556388	-0.542349	-0.823184	-0.795337	-0.901374	-1.04808	-0.228886	-0.60116	0.212469	-3.3973	-4.46795
TCGA.FD.A43Y.01	-0.317514	-0.133356	-0.21508	0.717303	0.587887	1.17332	1.04839	0.445709	0.292324	-0.00556789	-1.43181	0.428488	-0.23544	0.600818	0.43402	-0.589698	0.635194	-0.213792	-2.33203	-0.284854	1.02971	-0.0275871	0.373836	0.92432	0.0713803	-0.0171494	0.649239	0.00630622	4.11455	4.12023
TCGA.GV.A3JV.01	0.487149	0.143911	0.437014	0.19077	0.427275	-0.696574	0.0426513	-0.148225	0.942826	-0.180788	0.648127	-0.156409	0.124196	-0.281409	-0.481926	0.0699673	-0.364002	-0.047945	1.34442	0.0648668	0.281479	-0.686307	0.0822056	-0.356618	-0.0335011	0.198625	2.08013	1.03014	4.40041	-1.75449
TCGA.FD.A3SL.01	0.244963	-0.218235	-0.0767571	0.257254	-1.46317	-0.174891	0.460291	1.4688	0.785902	0.339089	0.506418	0.940059	0.171058	0.599799	0.569979	1.14752	-0.0902004	0.439276	0.817907	1.03494	0.677588	-0.25272	0.86356	0.259132	0.779509	0.693745	-0.802661	1.6747	3.15679	3.44936
TCGA.XF.AAMG.01	-0.506315	0.66415	-0.690674	-0.851449	-0.592299	1.14362	-0.860536	0.360726	-0.652772	-1.26978	-1.18868	0.0175015	-0.88876	0.222033	-0.300106	0.585763	-0.770826	-0.397758	-0.237948	-1.13682	0.0192564	-0.552479	-0.900875	-0.354564	-0.973457	-0.763116	-0.788289	0.55914	-6.5616	-0.954057
TCGA.E7.A6ME.01	-0.241549	0.37164	-0.0725824	0.33256	-0.228798	-0.0299298	-0.414692	-1.0807	0.395861	0.160262	-1.3083	-1.44899	0.0152678	-1.66248	-0.874069	-1.54405	-0.49583	-1.32207	0.315612	0.916566	-0.807847	-0.986435	-1.39774	-1.35446	-0.524696	-0.797838	0.766389	-0.40924	-0.459183	-7.21018
TCGA.BT.A20R.01	-0.615832	-0.436497	-0.64708	0.00774248	-1.61368	0.380459	0.95947	0.784594	0.169472	-0.3503	0.769356	1.09134	-0.463274	1.39836	0.565861	0.989002	-0.0873523	0.892822	-0.210422	0.211349	1.14695	0.441887	1.33446	0.113935	1.15822	0.727002	-0.847451	2.01521	0.111566	6.14761
TCGA.UY.A8OD.01	0.840682	-0.56716	0.246167	-0.169972	-1.71003	1.71526	1.16093	0.0905234	-0.207282	0.349497	-0.0847502	-0.986012	0.550421	-0.246333	0.511895	0.545363	0.510939	0.0849937	0.738732	0.0872566	0.31064	-0.286278	0.245526	-0.174388	0.392818	0.678299	-0.181987	0.592113	0.0868818	2.86873
TCGA.FD.A6TH.01	0.266822	-0.151908	-0.575903	0.402379	-1.74232	-0.311962	-0.725057	-0.202895	0.623869	0.0501364	-0.110972	1.12389	0.325539	0.306311	0.139824	0.168873	-0.182281	1.59088	-1.93919	0.749606	0.767191	0.256285	-0.0628979	0.516428	0.364159	0.0874628	-0.0730693	-0.291471	-0.79051	0.370236
TCGA.2F.A9KR.01	-1.05503	-1.3236	-0.812892	-0.739961	0.282286	-0.362805	-0.243365	-0.468896	-1.65619	-0.351374	0.209876	-0.228456	-0.918589	-0.840295	-1.29481	-1.36592	-0.663	-1.49204	-1.03363	-0.370396	-0.960362	-0.00632919	-0.604033	-1.16966	-1.46461	-1.13649	-0.960381	-1.23426	-8.74162	-6.17519
TCGA.BT.A20O.01	2.27262	3.11006	3.13571	2.04403	0.0105754	0.209203	1.3495	2.06061	1.96995	2.39712	1.57305	1.932	2.59926	0.761102	2.53975	1.44337	2.06219	2.11126	0.576292	1.52626	2.62427	0.042343	1.49192	2.11697	2.28024	2.46223	0.479047	1.09038	19.3353	9.59495
TCGA.LT.A5Z6.01	-0.210262	-0.217591	-0.160178	-1.04411	-2.47044	0.9931	-1.55223	-0.798422	-1.76718	-0.98884	-1.8459	-0.809628	-0.255349	-0.851895	-0.903127	-1.10726	-0.385609	-1.09555	-0.542766	0.0325517	-1.35349	-0.393393	-0.200023	-0.722948	-0.722596	-0.797972	-1.48477	-1.01413	-12.1322	-3.47802
TCGA.ZF.A9RC.01	-1.04658	-1.31299	-1.01162	-1.1099	0.166218	1.35408	-0.254985	0.0602407	-0.0999137	-1.04512	-1.52975	-0.728553	-1.01889	-0.537853	-0.54708	0.108331	-0.366802	-0.795894	-0.330425	-0.707842	-0.331762	-0.884707	4.12e-05	-0.707597	-0.173871	-0.711163	-1.10555	-1.09737	-7.46439	-2.78729
TCGA.BT.A20N.01	-1.01037	-0.282854	-1.09488	-1.34906	0.0548341	-0.868755	-0.916837	-0.0875702	-0.506366	-1.35332	-0.148809	0.157536	-1.37021	0.425269	-0.983649	-0.680717	-0.875401	0.205572	-1.06492	-0.823967	-0.733048	-1.28728	-2.28853	-0.702095	-1.05375	-0.501282	-0.413123	1.55167	-8.00747	-4.74023
TCGA.DK.A3WX.01	0.153259	0.272402	0.572704	1.26455	-0.131913	-0.454217	1.23453	0.742871	-0.441182	0.652269	-1.00505	0.176995	0.141496	1.12148	0.691124	-0.01285	0.864185	0.373059	0.179201	0.247642	1.78493	3.78844	1.62386	0.656891	-0.0858021	0.697406	0.835155	-0.696289	7.73135	5.80704
TCGA.CU.A0YN.01	0.219336	0.752543	0.0939943	0.834829	0.3801	0.251949	1.01866	0.661815	-0.110489	-0.117347	-0.633775	1.00963	0.536836	0.539144	-0.0787544	0.0116203	0.674934	0.0898772	-0.988319	1.03764	0.488578	2.46623	0.887074	0.964307	0.757932	0.461056	-0.458101	1.27126	5.04328	6.50991
TCGA.CF.A9FH.01	-0.978588	-0.843851	-0.914834	-1.12669	1.05191	0.159009	-1.15347	-0.456734	0.138138	-0.535657	-0.96719	-0.79652	-0.552236	-0.727947	-0.530408	-1.95623	-1.45517	-1.08386	0.179037	-1.25422	-1.06803	-1.23315	-1.58425	-1.08532	-1.38015	-1.21813	0.583157	-0.109801	-6.79841	-6.56704
TCGA.FD.A3SP.01	0.421764	0.0436656	0.192532	1.54177	-0.371124	-0.474131	0.639944	1.50623	1.21174	1.30914	-0.409706	0.684154	0.94068	1.0573	1.64843	0.978854	1.49329	0.280228	0.74315	2.21841	1.60776	0.0811093	0.960663	2.12876	1.45184	1.85972	0.387246	1.02032	11.9286	7.78698
TCGA.GU.AATP.01	-0.638413	0.627468	-0.203635	-0.00790984	0.486739	-0.972219	0.633729	0.585757	-1.32047	-0.24069	-0.906798	0.68273	-0.352208	-0.59148	0.218728	0.259472	0.27691	-1.82574	0.981587	0.457533	0.237353	-0.0642934	0.291851	-0.0994814	0.569352	0.193754	0.248408	-0.106829	1.69804	-1.04681
TCGA.FD.A5BT.01	1.58513	0.132775	2.61478	1.88536	0.16177	1.55845	1.09074	1.65233	0.966751	2.09801	1.52442	2.4462	1.23897	-0.503175	2.55506	1.77754	2.17447	1.15808	0.909638	1.24102	1.94214	1.09494	1.0891	1.98323	2.18147	1.6651	0.056161	0.00979718	14.7941	9.23235
TCGA.CF.A3MI.01	-0.773479	-0.346134	-0.104785	-0.902433	0.0939869	0.120337	0.188658	-0.558397	0.0135335	-0.611834	0.897548	0.0262209	-0.492835	-0.930107	-0.287886	0.280838	-0.226052	-0.780591	1.34809	-0.487702	-0.429972	-0.150506	-0.247862	-0.999986	0.64822	-0.600608	0.945658	-0.49997	-2.80003	-3.22203
TCGA.LT.A8JT.01	-0.14395	-0.656215	-0.287345	-0.413442	0.85064	-0.245097	-0.669933	-0.660364	-0.403255	-0.1229	0.676351	-0.594915	-0.15763	0.462081	-0.670187	-0.425215	-0.697693	-0.210852	0.661539	-0.950618	-1.19801	-0.828445	-1.46747	-0.33417	-0.764381	-0.432606	0.613973	-1.24216	-4.33008	-5.02314
TCGA.CF.A47T.01	-0.97371	-1.04708	-0.365362	-1.53293	0.77885	-0.0858226	-0.69094	-1.22618	-0.637222	-1.40432	-0.522755	-0.71962	-1.61531	-1.2533	-1.1659	-1.16553	-0.928964	-0.0685989	-0.903134	-1.59048	-1.48648	-1.18824	-1.49582	-1.21719	-1.03684	-1.45917	-0.856422	0.0995824	-11.5177	-7.23565
TCGA.FJ.A3Z9.01	-0.982384	-0.539813	-0.850308	-1.4444	-0.923133	-0.663374	-1.13817	-1.01553	-0.180729	-1.6131	0.213	-1.19654	-1.17422	-1.28285	-1.45146	-1.16519	-1.31257	-0.492578	0.625858	-1.81692	-1.39186	-0.888375	-1.16528	-1.27544	-1.52615	-1.15213	0.199657	-0.394952	-11.8664	-8.4343
TCGA.DK.A6AW.01	-0.77775	-0.81479	-0.533135	-0.781086	-1.30988	-1.45361	-0.0882707	-1.14452	-1.15984	-0.984522	0.807984	-0.97683	-1.11413	0.809161	-0.514755	-0.445744	-0.997087	-1.44026	0.698459	0.32569	-0.716187	-0.0556732	-0.452797	-0.209784	-0.922516	-1.13851	0.27008	-0.594547	-8.07498	-3.4691
TCGA.E7.A97P.01	0.257582	1.35844	2.09493	1.39863	1.36016	-0.671314	1.32521	0.511248	0.682023	1.53018	0.249441	0.520426	0.601958	0.857166	-0.113242	-0.100481	1.19443	-0.39935	0.0768164	1.33551	1.40051	0.52329	0.960198	0.764667	0.363776	1.17328	2.48241	1.47619	16.0752	4.99139
TCGA.E7.A6MF.01	0.0503672	-2.71884	-1.18107	-1.09854	-0.609495	-1.27542	-1.04739	-1.51768	-0.00376566	-0.322171	0.0114812	-2.64556	-0.652446	1.07108	-0.285442	-2.18117	-1.35256	-0.402867	0.0151255	0.023637	-1.73711	0.150965	0.0888769	-1.06232	-1.40904	-1.30012	1.12866	-3.16442	-9.66504	-4.66483
TCGA.S5.AA26.01	-1.02668	-0.53012	-1.10816	-1.71585	-0.422141	-0.188456	-0.787924	-1.03246	-1.10395	-1.35611	-0.197819	-0.403855	-1.36276	-0.370779	-1.43781	-1.31723	-1.39	0.195581	-0.536542	-0.910295	-1.11318	-1.54537	-1.39389	-1.6162	-1.8743	-1.73616	-1.01938	0.0296322	-12.8357	-7.91287
TCGA.ZF.AA52.01	-0.302303	-0.835994	-0.254746	0.716287	-1.44768	-0.3827	1.01933	1.19205	-0.264173	0.409916	0.379959	0.496508	0.127434	0.740568	0.922363	0.745074	0.787927	0.372726	-0.377486	1.52675	1.02383	0.966724	0.799305	0.889941	0.940909	0.8899	0.130857	-0.437401	4.10634	4.28673
TCGA.CU.A3KJ.01	-0.70544	1.2732	-0.393277	0.697733	0.193423	-1.82314	0.21138	-0.110154	-0.39831	0.0713735	-0.752324	0.511916	0.182133	1.06944	-0.826353	-0.290691	0.251668	0.347972	-1.92058	0.186994	0.844629	2.04728	-1.05016	0.597681	-0.520843	-0.167259	0.812469	0.16627	3.2222	0.385406
TCGA.DK.AA76.01	-1.21225	-0.725353	-1.17184	-1.99152	-0.56292	-0.361018	-1.99923	-1.16941	-0.848292	-1.60482	-1.36748	0.39819	-1.10907	-1.46185	-1.01883	-1.64692	-1.5354	-0.695723	-0.974282	-2.15787	-1.90205	-1.40655	-1.68102	-1.49383	-1.91901	-1.38596	-0.192195	-0.408081	-15.5536	-9.36659
TCGA.CF.A1HR.01	-0.0383317	-0.186495	-0.0563127	-0.573001	-0.11049	0.864745	-0.0453336	-0.507261	-0.670095	-0.116062	0.247046	-0.823459	0.0253747	1.40021	-0.224475	0.736354	-0.418087	-0.349186	0.431567	-0.175257	-0.358063	0.0443515	0.479022	-0.625796	-0.243666	-0.709793	1.17642	-0.925841	-2.33174	0.594132
TCGA.DK.A6B1.01	-0.726233	-0.645249	-0.915057	-0.910372	0.0232354	-0.753781	-0.845061	-0.136553	0.110064	-0.254295	0.280878	0.288648	-0.572606	-0.212587	-0.798529	-0.347122	-1.43745	-0.562855	1.15694	-0.682713	-1.04776	0.169805	-0.249396	-0.846548	-1.50106	-0.75699	-0.735026	-0.316327	-6.79578	-4.44481
TCGA.CF.A47Y.01	-0.480205	-2.44686	-0.861342	-1.4679	0.199785	0.193553	0.155899	-1.53043	-0.898147	-0.843126	0.319461	-0.636752	-0.945932	-0.816207	-0.591789	-0.914683	-1.19619	-1.61815	-0.436021	-0.928262	-1.29409	-0.9085	-1.73747	-1.35657	-0.516034	-1.42429	-0.144655	-2.03005	-11.0366	-8.41318
TCGA.4Z.AA82.01	0.159113	0.939391	-0.750197	-0.191246	-0.0696158	0.284159	0.361014	0.369449	-0.268305	0.0637571	0.558551	-0.867565	0.204774	1.17418	-0.271795	0.159465	0.0340754	0.688703	-2.15663	0.190752	0.612046	0.732693	0.219584	0.494325	-0.187042	0.283426	0.427759	1.11705	1.96823	3.78427
TCGA.GC.A3RC.01	0.140449	0.297171	0.634896	0.141559	1.05391	-0.0875378	0.63425	0.874426	0.386272	0.758076	-0.691246	1.80861	0.837023	0.0736942	0.681297	-0.22581	1.04969	0.940252	-0.523614	0.571056	1.09822	0.881384	0.100608	1.4332	1.13629	0.232869	0.0787317	1.25587	6.76144	5.38821
TCGA.E7.A678.01	0.164271	-1.6888	0.250821	-1.14087	1.34373	-0.217502	-0.726229	-1.25497	-1.61564	-0.304845	0.554029	-0.306997	-0.431358	-0.753252	-0.30045	-1.54673	-0.858264	-1.41228	0.287019	-1.54838	-1.5589	-1.59637	-1.16426	-0.957795	-0.496235	-0.819397	-0.0808833	-1.79762	-9.14436	-7.64551
TCGA.UY.A9PB.01	0.681688	0.646591	1.33628	1.51087	0.245398	0.126387	0.791613	1.42771	-0.307813	1.14682	0.0193434	1.10742	1.17548	1.41096	1.11904	0.776842	1.51522	0.253276	-0.378322	1.65812	1.49572	0.648711	0.561769	2.04344	1.62418	1.23195	-0.0630657	0.280682	11.1202	7.66278
TCGA.ZF.AA5H.01	0.648889	0.920827	0.463462	0.629644	-0.935616	-0.804233	0.499798	0.350794	-0.667561	0.819929	-1.50324	1.06658	1.11469	-0.453044	0.347689	-0.293803	0.362802	1.11833	-1.09864	1.22243	0.762074	-0.116313	0.123356	1.31846	1.62166	0.869686	-0.589231	0.459804	4.34623	1.23852
TCGA.KQ.A41O.01	-1.37517	-1.39263	-1.37509	-2.09168	-0.282123	-0.189322	-2.36581	-1.29419	-1.21436	-2.15364	-1.00366	-1.14415	-1.41086	-1.41575	-1.87155	-1.76387	-2.18008	-0.766448	-0.212059	-1.76028	-1.7403	-1.70456	-1.2002	-1.93928	-1.82462	-2.26736	-1.04806	-0.896684	-18.107	-11.2173
TCGA.MV.A51V.01	-0.817955	-0.412549	-0.86271	-1.63345	-1.33945	0.586378	-1.28979	-0.315664	-1.83165	-0.89003	0.726271	-0.807561	-1.43	-0.6056	-1.43082	0.216097	-1.71946	-0.772681	1.00171	-0.274055	-0.763536	0.172551	1.15072	-1.16223	-0.676007	-0.088677	0.0185161	-0.880391	-9.68304	-3.88886
TCGA.BT.A0S7.01	-0.0729046	0.323219	-0.59128	-0.730435	-1.01712	-1.57724	0.128516	1.17172	0.0389999	-0.753865	0.965969	0.634107	-0.609505	0.56849	-0.646574	0.205393	-0.177544	0.457556	-0.550775	-1.07714	-0.0199293	0.0224289	-0.116562	-0.407454	0.0995981	-0.59174	-2.47004	-0.108663	-5.11905	-2.44312
TCGA.XF.A8HI.01	-0.327166	-0.477885	-1.01415	-0.693686	-0.258199	-0.339845	0.727793	-0.802439	-1.19364	-0.298177	0.0331049	-0.352344	-0.530681	0.216071	-0.641577	-0.267608	-0.705116	-0.779068	-0.0337785	-0.123153	-1.07615	-0.205402	-1.11384	-0.767643	-0.854364	-0.301188	-0.506905	-0.374081	-6.01777	-3.93143
TCGA.2F.A9KP.01	-0.539611	-0.327937	-0.835997	-1.32789	0.13667	-0.421892	-1.13792	-1.18694	-0.146267	-1.70121	0.2789	-1.67935	-0.898205	0.435198	-0.816745	-0.712088	-1.32028	0.8846	0.352642	-1.20305	-1.35496	-0.671967	-0.483135	-1.27405	-0.981572	-0.781395	-1.13687	-0.0873042	-11.0038	-4.64018
TCGA.CF.A8HY.01	-1.0451	-1.80966	-0.426164	-0.321162	0.876535	1.12985	-1.21569	-1.14969	-1.35987	-0.668632	0.170335	-0.506437	-1.06528	-0.210463	-0.829239	-0.0818616	-0.523206	-0.0451222	0.45429	-1.12766	-0.910879	-0.663636	-0.981277	-0.758523	-0.803682	-1.0404	-1.11024	-1.39153	-10.2635	-4.22803
TCGA.E7.A3X6.01	-0.238223	-0.010989	0.54127	0.948217	0.743809	-0.0372179	0.554689	0.519104	-0.471438	0.933018	-1.00228	0.231692	0.204278	0.342056	-0.444162	-0.410625	0.531702	-0.178305	-0.0218103	0.503041	-0.0411222	0.0872406	0.425802	0.0223901	0.141711	0.34027	-1.1286	0.793324	3.43127	1.72114
TCGA.DK.AA6Q.01	-0.242003	0.597952	1.01625	0.667563	1.15234	0.758698	0.984368	-0.798287	-0.467029	0.230238	0.254237	-0.485683	0.045831	0.447577	0.0270224	-0.588068	0.438134	-0.877382	-0.597384	-0.891806	0.695537	-0.0406605	-0.0981486	-0.135625	-0.0486661	-0.475662	0.430664	0.349364	3.14212	1.74636
TCGA.FD.A3B4.01	1.85424	0.794018	0.56754	0.215803	0.804738	0.059928	0.452856	0.0472398	1.44751	0.466897	-0.370717	0.385233	1.31434	0.0848016	0.17909	0.395882	0.832738	1.5213	-0.857971	0.446068	1.05208	1.39003	0.825631	0.850334	0.334226	0.740567	0.0689065	1.01321	7.10422	5.23576
TCGA.E7.A97Q.01	-0.316928	0.247643	-0.77627	0.43535	-1.0216	-2.15214	0.467632	-0.0424037	0.27641	-0.444785	0.372649	-0.80752	-0.179676	0.247728	-0.995918	0.195782	-0.480511	-0.863534	0.0493299	-0.296416	-0.296574	-0.579054	-0.815911	-0.410742	0.229901	-0.186362	0.0545617	-1.62073	-1.58281	-6.65514
TCGA.K4.AAQO.01	0.737984	-0.243228	-0.409385	0.0591731	-0.838835	-0.804751	0.814069	0.776128	1.63114	0.225644	1.34479	-0.553432	0.438299	-0.136206	0.313917	1.04471	0.014809	0.851924	0.644433	0.503415	-0.0767885	-0.680856	0.844715	0.14514	1.04162	0.652264	-1.40599	0.652471	1.68762	0.349239
TCGA.DK.A3X1.01	-0.684787	-0.0153941	0.0874117	-0.665457	0.285457	0.467953	0.314643	-0.330994	-0.133588	-0.263961	-0.0862866	0.670272	-0.832198	-0.187238	0.352588	-0.041905	-0.884209	-0.854752	-0.00705419	-1.31695	-0.455484	-1.11067	-0.92826	-0.690857	-0.881704	-0.178149	0.395289	0.418679	-2.27718	-2.56202
TCGA.DK.A3IK.01	0.0179114	-1.18656	-0.239867	-0.687212	-0.696506	0.125934	-0.417149	-0.517864	0.121764	-0.963761	-0.317017	-1.10865	-0.541804	-0.0564432	-0.523495	-0.0222669	-0.875687	-1.52238	0.108193	-0.718467	-0.70277	-1.10477	-0.317871	-1.17365	-0.416718	-0.311892	0.153422	-2.41659	-6.16686	-5.92598
TCGA.DK.AA6M.01	0.325796	0.251145	0.758893	0.807351	0.420391	1.71055	0.918972	0.0257815	-0.636303	0.882797	-0.852878	0.969607	0.452032	-0.263225	1.10413	0.313858	1.18954	0.331605	-0.285793	0.980985	1.30078	0.991512	1.06738	1.48584	1.02544	0.708373	-1.1021	0.519767	5.31706	7.8055
TCGA.DK.A3IT.01	0.492244	0.643207	-0.325122	-0.409559	-0.595869	0.490831	0.416171	1.59828	0.724369	-0.269704	-0.750316	-0.298058	0.304876	0.206896	-0.0407457	0.1704	0.0988669	1.12373	0.243105	0.265054	-0.177051	-0.199353	0.0809678	-0.18604	0.211537	0.480432	-0.697409	-0.277932	1.6528	0.173491
TCGA.C4.A0F1.01	0.0727812	0.337155	-0.623938	0.651328	0.253518	0.241896	0.695774	0.338938	0.666866	-0.0752646	-0.720871	0.754255	-0.216515	1.41632	-0.385166	-0.44812	-0.164084	0.443964	-1.1555	0.0304558	0.54124	1.45157	-0.239116	0.151272	-1.37688	0.195406	-1.63148	0.629556	1.37999	3.10225
TCGA.FD.A5BZ.01	-0.185953	-0.691101	-1.06687	0.0471942	0.0102172	0.452934	0.274159	0.87444	1.2444	-0.222893	-0.64964	0.484534	-0.439029	0.984303	0.320717	1.02377	-0.286804	0.583108	0.262966	0.433491	0.218348	-0.683303	0.961439	0.349933	0.399049	0.169897	-0.877959	0.138744	0.41332	2.23796
TCGA.ZF.AA53.01	0.162683	0.45493	0.725834	1.02508	0.920132	1.73857	1.04176	1.40724	0.0113024	1.14535	-0.521395	2.84969	0.581487	0.734965	1.26087	-0.140345	1.62735	0.253499	-1.04664	0.829232	1.77793	2.4768	0.920424	1.94928	1.59064	0.860411	0.731309	1.76681	10.9305	11.9983
TCGA.YC.A89H.01	-0.429695	-0.174613	-0.114845	0.0934258	0.0495631	-0.232786	-0.193388	0.276659	-1.03055	-0.461226	0.281521	0.515457	-0.114373	-0.572732	-0.423382	-0.0293092	-0.0759666	-0.119908	0.774632	-0.620646	-0.22607	-0.205419	-0.475037	0.531428	-0.0666493	-0.401802	-2.14911	-0.96258	-4.80349	-2.41647
TCGA.UY.A9PE.01	-0.147296	-0.11302	-0.381888	-0.828056	-0.230286	-0.392726	-1.62377	-0.825962	1.08334	-1.19172	-0.705378	-0.949027	-0.696945	-0.788121	-0.252425	0.327074	-0.769389	-2.46965	1.02914	-0.800703	-0.747297	-1.23688	-0.57139	-1.22159	-0.604437	-0.614919	-0.505651	-1.00964	-6.77993	-6.24216
TCGA.BT.A3PK.01	-0.38551	1.13578	-0.252673	1.06554	0.443252	-0.102546	0.899403	1.13459	0.0524257	0.329157	0.346412	0.775075	0.227188	0.13101	0.548206	1.17413	0.566022	-0.580606	-0.944598	0.827045	0.389362	2.45215	1.28458	0.932815	0.31778	0.550415	1.51939	-0.178195	8.09369	5.18189
TCGA.GU.A42P.01	-1.26793	-0.00432514	-1.67462	-1.07436	-1.71551	-0.895258	-1.5346	-1.14714	-1.67426	-1.90349	-1.66789	-0.902729	-1.45499	-1.55917	-1.2657	-0.00979795	-1.59654	-0.74917	-0.362428	-0.709987	-1.27664	-0.831936	-1.40041	-1.26785	-1.11062	-0.918615	-0.424206	-1.64241	-14.0578	-10.4593
TCGA.KQ.A41Q.01	-1.08983	0.324031	-0.700272	-1.59881	0.0789277	0.989818	-1.42313	-0.842346	-0.472277	-1.40732	0.0677152	-0.607144	-1.05225	0.18426	-0.614291	-0.102145	-1.03003	-1.04058	-1.16403	-2.01244	-1.23624	-0.90729	-1.1075	-1.20495	-1.22536	-1.30635	-0.34826	-0.580538	-10.932	-4.27052
TCGA.SY.A9G5.01	0.125473	0.729634	1.43314	1.59464	0.226949	0.5956	1.58625	0.660068	0.808657	1.56711	0.625888	0.30102	0.441268	0.0664844	0.960931	0.587621	1.39457	0.80844	0.308026	0.884995	1.07162	-0.208147	0.896062	0.905718	0.99134	1.23649	0.463956	0.647691	12.2635	5.25891
TCGA.UY.A78P.01	0.49147	1.20067	1.03578	1.69974	2.44848	0.40727	1.7207	1.34495	0.981165	1.36169	1.38671	1.50771	0.986346	1.1422	1.76877	1.513	1.77282	0.343238	0.620978	1.11538	1.34227	1.10389	0.810505	1.91947	0.999867	1.3146	1.89155	1.14102	17.0085	10.0659
TCGA.UY.A78O.01	0.0766271	-0.607488	-0.244531	-0.584616	1.51823	0.57355	-0.417259	-0.423616	-0.914149	-0.778008	-0.482731	-0.0646822	0.0228963	0.173165	-0.674749	-0.524495	-0.544743	-1.0051	0.154408	-0.334292	-1.16609	-0.676738	-0.686941	-0.815166	-0.573811	-0.857918	-0.239501	-1.29653	-5.04924	-3.94815
TCGA.DK.A3WW.01	0.215358	1.72894	2.63353	2.02622	2.09057	-1.15533	1.57339	-0.0714782	0.164151	1.70851	-0.181964	1.02889	0.948471	1.58928	0.796943	0.292931	1.63522	-0.205284	-0.353875	0.350785	1.76066	1.91949	-0.319617	1.34507	0.37995	1.15734	0.423995	1.39597	14.7963	7.20702
TCGA.G2.AA3D.01	-0.0657014	-0.72873	-0.722096	-1.19261	-0.360032	0.377693	-0.583487	-1.41381	-1.41062	-0.463651	-0.848512	-1.11007	-0.144348	-0.0371739	-1.08725	-1.09241	-0.656872	-0.272625	1.14871	-0.753231	-1.70201	-0.0654102	-0.765064	-1.23386	-0.671223	-1.04535	0.319186	-0.411847	-10.0564	-3.87979
TCGA.ZF.A9R5.01	0.0630077	-2.11525	-0.168467	-1.14968	0.289711	-0.696049	-0.217027	-1.15805	-1.21565	-0.488861	-0.968603	-0.421327	-0.295666	-1.25779	-0.586098	-2.39699	-1.16452	-1.22522	-0.148359	-1.60245	-1.52468	-1.07887	-1.88539	-0.845151	-1.59565	-1.08991	0.211408	-1.43627	-10.1137	-8.95014
TCGA.KQ.A41P.01	-0.45607	-0.675513	-0.232577	0.0450923	-0.420469	1.06209	0.275405	0.695169	-1.01123	0.112672	-0.8391	0.876939	-0.648616	0.359396	0.705494	0.0995241	0.397444	-0.274786	0.528272	-0.373637	-0.51486	-0.267315	0.666763	0.273246	0.406728	-0.157003	0.137435	-1.44847	-2.11952	1.74865
TCGA.DK.A1AG.01	-0.712612	-1.23251	-0.247826	-0.589922	0.885321	-0.162018	0.769871	-0.708206	-0.751485	-0.636129	-1.19894	0.0457824	-0.866834	0.466652	-0.592875	-1.2226	-0.347683	-1.03809	0.364674	0.16629	-0.805819	0.0517975	0.209906	-0.616869	-1.00304	-0.977665	-0.573783	-1.15054	-4.70186	-2.14163
TCGA.ZF.A9R2.01	-1.20829	-0.981159	-1.06879	-1.43499	0.36451	-0.406815	-1.85166	-1.14479	-0.679752	-1.03276	-0.378197	-1.13101	-1.1857	-1.10848	-0.904578	-1.1636	-1.24249	0.169946	-0.186507	-1.27314	-1.58197	-0.95322	-1.20822	-1.20458	-1.38697	-1.06089	-1.49791	0.122446	-13.2433	-6.90595
TCGA.DK.A1AC.01	-0.106398	2.26782	0.918104	0.222359	-0.226718	-1.23014	-0.898285	0.446288	0.327262	0.298104	1.36062	0.333892	0.309146	-0.244636	0.177437	0.249777	0.259591	-2.64881	0.0136745	-0.00528508	0.547845	-0.905275	0.100943	0.220617	0.274629	0.773107	0.00723215	1.16309	4.41001	-0.458373
TCGA.BT.A20P.01	-1.17909	-0.499414	-0.80755	-0.510694	1.06011	0.636642	-0.204332	-0.54426	-1.37813	-0.913505	-0.465172	-1.18227	-1.17713	-0.775044	-0.948871	-1.52297	-0.852399	-0.940003	0.188234	-0.420448	-0.758761	-1.47295	-1.21383	-0.979888	-1.68534	-1.17716	0.498307	-0.402164	-5.65583	-6.0085
TCGA.XF.AAMY.01	-0.618758	-0.662754	-0.986472	0.129764	-0.690165	0.531635	-0.592927	0.232914	0.74328	-0.360485	0.0570005	-0.0744699	-0.522226	0.918745	-0.130443	0.999818	0.0497398	-0.730502	1.10019	-0.332037	-0.472727	-0.467026	-0.210028	-0.164021	0.216748	0.255612	0.645146	-0.399371	-2.09085	0.129231
TCGA.K4.A4AB.01	-0.586265	-1.24334	-0.28459	0.502988	0.767061	0.11322	1.23977	0.575931	-0.420978	0.459324	0.617226	-0.0889802	-0.202152	0.912366	0.102436	-0.238609	-0.139343	-0.144925	1.06232	1.65042	0.243404	0.252477	0.681408	0.109246	-0.326311	0.249555	0.502564	-0.988346	4.2421	1.04346
TCGA.BT.A3PH.01	-1.4044	-0.348319	-0.667873	-0.349429	-0.586626	-0.918671	-0.78072	0.00135313	-0.339592	-1.2587	0.71216	0.316439	-1.11168	0.207135	-1.09454	0.103155	-0.746665	0.555544	-0.10056	-0.694968	-1.06199	-0.16896	0.270473	-0.782687	0.0488564	-0.686215	-0.0781459	0.406212	-6.85123	-2.8277
TCGA.BT.A3PJ.01	0.335687	1.28874	0.451051	0.673772	1.26798	-2.41195	0.146141	-0.28387	-0.0732937	1.13153	-0.612235	0.642149	0.34888	0.570434	0.267474	-0.550196	0.603793	0.193615	-0.823631	1.67614	1.10143	1.27886	0.188087	0.884515	-0.00541003	0.039907	-0.476772	0.640761	6.94276	2.43392
TCGA.FD.A43X.01	-1.20886	-1.9884	-0.728371	-1.49083	0.310693	0.696604	0.252981	-1.12096	-0.8476	-1.28623	0.131682	-0.88819	-0.907354	-1.06418	-0.974009	-1.24088	-1.32957	-0.808553	-0.375942	-0.570885	-1.20398	-1.26502	-1.69635	-1.17735	-0.714835	-1.54159	-0.882968	-2.14536	-11.0981	-8.80988
TCGA.4Z.AA83.01	-0.783635	-0.763092	-0.590524	1.44138	0.202138	0.771255	0.188021	0.148903	0.0480162	0.0840627	0.617026	-0.753264	-0.47654	-0.948949	-0.075543	-0.441969	0.05674	-0.808385	0.218595	0.691982	-0.00108	0.679789	-0.829188	0.328268	-0.532974	-0.407992	1.67355	-1.01953	2.71537	-1.03716
TCGA.DK.AA6T.01	5.18804	2.78875	1.05617	0.789779	-2.2349	-0.971046	-0.419676	-1.50777	1.71399	0.800877	2.01523	-0.588526	5.41299	-2.20394	0.666628	-0.3599	0.78561	3.73722	1.11912	-0.588595	-0.129336	-0.565844	-0.565807	1.12057	0.806568	0.382208	-1.02559	-1.25807	1.07206	-2.78796
TCGA.E7.A8O8.01	-0.815219	-0.915196	-0.188315	-1.05769	-0.129325	1.07722	-0.558943	-1.26503	-1.7444	-0.870398	0.429833	-0.386502	-0.92779	-1.402	-0.59562	-1.25092	-0.896562	0.0356909	0.0401202	-1.17903	-1.50815	-0.943379	-1.01602	-0.716252	-0.282633	-1.18594	0.897259	-0.981531	-9.70515	-5.47414
TCGA.FD.A3B6.01	0.316529	0.956249	1.14614	1.53994	0.197921	-0.372571	1.48144	0.495592	-0.773916	1.11773	-0.642075	1.57002	1.02167	0.320119	1.02099	-0.450295	1.27394	-0.438667	-0.232667	0.890864	1.41934	1.27153	-0.240413	1.3446	1.09468	1.08337	-0.537817	0.090291	9.01685	4.70848
TCGA.E7.A7DV.01	-0.108351	0.655513	0.613106	2.42798	0.280805	-1.35686	1.13736	2.22015	1.15255	1.2654	-0.490833	3.52882	0.845262	2.08971	3.05177	0.441714	2.00674	-0.541453	0.413929	1.70487	1.86465	1.05466	1.14958	2.55705	2.34162	0.83522	0.179371	-0.0832911	13.6888	8.76409
TCGA.ZF.AA5N.01	-0.416202	-0.387211	-0.470011	-0.685773	-1.12476	-0.297397	-1.25511	-2.51509	0.11181	-0.688249	-0.717552	-0.559561	-1.00653	-1.35543	-1.12333	-0.170768	-0.833218	-1.23304	-1.17615	-0.389854	-0.933663	0.515035	-0.0221637	-0.2394	-1.67506	-0.939407	2.58974	-1.64598	-6.76224	-5.00189
TCGA.CU.A72E.01	-0.563948	-1.09526	-0.644024	-0.217236	-0.290294	0.139667	0.0513087	-0.0208341	0.121049	-0.279587	-0.576066	1.17381	-0.807549	1.76551	-0.433703	-0.759619	0.0344751	0.168309	0.187254	-0.00492928	0.0415488	0.466041	0.297548	-0.236924	-0.0895765	-0.367606	-0.547035	-0.565909	-3.2529	1.46671
TCGA.GU.AATO.01	0.585254	-0.629623	0.621916	1.11345	0.634369	0.393539	0.792602	1.23611	0.323733	0.514125	-0.625171	0.0562146	0.280085	2.441	0.646926	0.0820015	1.09338	0.63663	-0.068446	0.262582	-0.0721846	0.426866	0.0348956	0.603503	0.798481	0.340496	-0.743495	-1.67247	4.39408	3.52664
TCGA.GD.A3OP.01	0.199915	-0.91294	-0.285909	-0.164962	0.0328999	0.755248	0.00996341	0.914394	-0.939622	0.368124	0.908672	-0.0319317	0.0670168	0.542113	0.223738	1.01413	-0.581415	-0.684911	0.919535	0.603038	-0.410258	-0.360953	0.237692	-0.146844	0.00158502	-0.21984	-0.0554677	-0.283516	-1.06058	0.386063
TCGA.XF.AAN5.01	0.213329	1.90493	0.847385	0.726714	1.34671	-1.03402	1.02543	-0.36665	0.34216	0.927855	1.44504	0.626179	0.647626	1.60571	0.581548	0.78272	0.756118	0.570216	-0.691734	0.330613	0.793974	0.955879	0.131271	1.05628	0.108918	0.882745	0.959349	2.39397	9.72122	6.05279
TCGA.XF.A8HG.01	-0.975153	-0.399467	-1.02952	-1.00492	0.572397	0.305625	-1.29571	-0.305462	-0.992256	-1.3952	-0.126847	-1.71356	-0.991872	-0.0674607	-1.30863	-0.92966	-1.44568	0.467013	-0.629342	-2.66975	-1.66618	-1.63707	-1.729	-1.11271	-1.07412	-0.650611	0.885651	-2.01754	-9.28128	-8.99493
TCGA.E7.A5KE.01	-1.05895	-0.467148	-0.967535	-1.44108	-0.536014	0.134867	-2.33199	-1.73868	-0.515674	-1.95398	-2.16091	-2.09534	-1.25934	0.455923	-1.86608	-0.627746	-0.901415	0.461631	-2.00743	-1.74734	-1.30353	-0.649705	-1.37955	-1.20409	-1.32405	-1.35786	0.0564982	-0.682175	-13.9723	-6.09222
TCGA.XF.AAN3.01	-0.153868	-1.04368	-0.638357	1.1947	0.293543	1.17558	1.20927	0.225261	0.639988	0.37055	-0.338329	-0.598644	-0.0992405	0.998116	0.082983	0.0884079	0.494226	0.0840391	0.031092	0.00190364	-0.00461171	0.183206	1.21619	0.203801	0.022224	-0.0172127	0.715711	-1.09279	2.94707	3.26131
TCGA.GD.A3OQ.01	-0.774957	0.284627	-0.929881	-0.31789	-0.902138	-0.660455	-0.00221893	-0.281596	-0.56725	-0.227439	0.48627	-0.671571	-0.813949	-0.0191077	-0.313889	-0.0554607	-0.410136	0.0243458	0.0666031	0.502945	-0.27415	1.30772	-0.304074	-0.506783	-0.533271	-0.260689	1.50251	1.39012	-1.47317	0.483397
TCGA.DK.A1AE.01	-0.703747	-0.0586724	0.167672	-1.61948	-0.761023	-1.19658	-1.20014	-1.79324	0.570121	-0.704372	-0.217832	-2.06536	-0.58972	-0.452724	-1.14345	-2.25273	-1.1557	-0.632035	-1.89737	-1.45074	-0.20443	-1.03319	-1.05374	-0.525721	-0.992553	-1.09832	-2.1122	0.286448	-10.1526	-6.27466
TCGA.GV.A3JW.01	-0.778429	-0.893148	-1.26194	-2.10916	-1.16244	-2.03157	-1.04916	-1.2017	-1.83079	-1.41539	-1.01687	-0.435694	-1.40217	-1.19482	-0.909268	-0.544692	-1.39676	-0.44295	-1.34398	-1.32699	-1.61514	-1.02974	-1.18681	-1.47515	-1.2805	-1.48709	0.189598	-0.551396	-15.0542	-9.74395
TCGA.FD.A3SM.01	-0.764039	-0.69128	-1.06722	-0.391729	-0.0312067	1.46289	-0.290894	1.00137	-0.356321	-0.6244	-1.59751	-0.276424	-0.424685	1.59608	-0.501878	-0.643788	-0.147549	-0.560757	1.46461	-0.016038	-0.102689	-0.251153	0.919387	-0.0899317	0.0309223	-0.346199	-0.842389	-1.00956	-3.759	1.97829
TCGA.GU.AATQ.01	-0.599122	-0.354797	-0.528217	0.0539514	0.264686	1.23855	0.413096	-0.867205	-0.316074	-0.19482	-1.25164	-1.14304	-0.463348	-0.0694975	-0.333371	-1.77124	-0.0536846	-0.118217	-0.378591	-0.456433	-0.0859791	-0.791253	-0.26442	-0.228693	-0.585806	-0.762913	-1.11326	0.0530311	-3.94797	-0.449339
TCGA.CF.A47S.01	-0.366754	-1.43568	-0.0333491	0.079356	0.383482	1.29219	-0.268588	-0.936499	-0.0479017	-0.39568	-0.159163	-0.697944	-0.928748	-0.273969	-0.35172	-0.466085	-0.177289	-1.46786	1.37394	-1.18106	-0.718008	0.088446	-0.634105	-0.675714	-0.637399	-0.758649	3.1979	-1.96392	-3.31257	-2.69609
TCGA.XF.A8HB.01	-1.0246	-0.0254362	-1.19662	-0.841346	1.5725	0.764314	-0.402851	-0.608378	-2.14446	-0.412734	0.34492	-0.628538	-0.75907	1.16317	-1.32767	-1.70399	-1.28864	0.264705	-0.603089	-1.03145	0.161681	-0.908773	-0.563132	-0.836361	-1.22364	-1.04674	0.264968	-0.487491	-5.56641	-3.48458
TCGA.XF.AAMQ.01	0.544871	1.00194	0.870926	1.0282	0.999482	-0.0271174	0.050626	0.69285	-0.832974	0.85636	0.500823	0.465299	0.402523	0.0253016	-0.216403	0.0385736	0.323051	0.799814	-0.306567	0.738892	0.21625	-0.526266	-0.635515	0.289414	-0.161399	-0.294292	1.23005	1.4192	6.55831	0.651669
TCGA.DK.A1A7.01	0.748768	-0.259756	0.0996789	-1.03172	-0.556523	1.29841	-0.279714	-0.578115	-0.678971	-1.04531	0.347777	-0.614949	0.00969923	-0.337622	-0.509097	0.323285	-0.602331	-0.48336	0.28262	-1.0062	-0.764534	-0.88112	-0.28486	-1.27256	-0.682937	-0.376629	0.132034	-0.518696	-6.34576	-3.10788
TCGA.DK.AA77.01	-0.555762	0.363771	0.21669	0.120721	1.86186	-0.619417	-0.279928	-0.41168	-0.609117	0.244359	0.301917	-0.179899	0.118276	-0.30723	-0.776415	-0.310872	-0.520312	-0.353273	-0.939844	0.0615333	-0.822936	-0.512664	-0.717506	-0.259429	-0.449988	-0.122468	-0.281825	0.578499	0.340978	-3.13447
TCGA.E7.A6MD.01	1.35637	-0.635803	0.597496	-0.0874851	-0.548088	-0.993866	0.909828	0.292633	0.0773668	0.562382	0.587937	0.158991	1.03312	-0.409558	-0.0133711	0.484057	0.282432	0.0643352	0.873304	0.169255	-0.0427936	-0.608952	1.18765	-0.0373778	0.201722	0.788766	-0.729603	-0.505695	1.35395	-1.09874
TCGA.FD.A3SR.01	0.129271	-0.344221	0.0573886	0.67231	-0.433996	-2.38467	-0.820065	1.06809	1.24517	0.56669	-1.58693	-0.633478	0.475473	-0.489598	0.181945	0.190777	0.584432	-0.0476131	-0.643114	0.364151	0.199007	0.539316	0.862496	0.149292	0.851557	0.751053	-0.224974	0.295137	3.1006	0.123019
TCGA.BL.A0C8.01	-0.979463	-1.09496	-0.999887	-1.06865	-2.13767	-0.580034	-1.25029	0.45184	0.496593	-1.30879	-0.458503	0.948151	-0.718533	-0.552387	-0.495827	-0.101695	-0.891458	-0.665521	-0.262288	0.309138	-0.887576	-0.2091	-0.529908	-0.25959	-0.31695	-0.114877	-0.541024	0.953603	-8.00848	-2.5647
TCGA.ZF.A9RN.01	0.223466	0.979191	1.09856	0.871001	1.23878	0.99442	-0.636851	-1.53897	-0.938046	0.36599	-0.476709	-1.42686	0.176828	-1.43687	-0.311699	-0.591842	0.0535429	0.288368	-0.878043	-0.91416	0.178955	-0.0171284	-1.8445	0.49702	-0.398946	0.480643	-0.0533286	0.60201	1.13177	-1.4632
TCGA.CF.A3MH.01	-0.807289	-1.06136	-0.511603	-0.691703	0.891835	0.23096	-0.563505	-0.741404	-0.830575	-0.965517	-0.093341	-0.579915	-1.13406	-0.242145	-1.12943	-0.956551	-1.01406	-0.371098	1.31093	-0.35216	-0.826557	-0.520411	0.0817564	-1.23513	-0.783704	-1.22779	0.385956	-1.05069	-6.49439	-4.87914
TCGA.XF.A9SP.01	0.33177	-0.685007	-0.166235	0.206225	-0.950789	0.559254	0.945732	0.785445	0.890955	0.0762395	-0.211177	-0.349826	-0.0225474	-0.065654	0.747815	0.733338	0.0602968	0.160677	0.726138	0.51012	0.359772	-0.182251	0.137858	0.212174	1.35716	0.228187	-1.01849	-1.16334	1.18215	0.306153
TCGA.G2.AA3F.01	-0.88123	-0.578706	-0.32125	-1.03548	-0.594208	-0.0397382	-2.02863	-0.4787	-1.12816	-1.38058	-0.987307	-0.812947	-0.895665	-1.09871	-0.629029	-0.809631	-1.22001	-1.59866	-0.0301972	-1.38297	-1.7918	-0.95001	-0.142049	-0.939114	-0.921901	-0.825546	0.00409203	-1.23591	-11.5133	-6.25457
TCGA.4Z.AA7W.01	0.854045	1.98245	3.67277	1.28747	0.987915	1.14616	0.747913	-0.115427	-0.373993	2.38874	1.36316	0.747014	1.14666	-0.275736	1.01623	1.17913	2.13973	0.878747	-0.21215	0.706142	1.69597	1.12441	1.26617	0.992544	1.24188	1.52874	1.36844	-0.0683379	13.8156	7.20144
TCGA.GC.A6I1.01	1.26459	1.44379	2.20678	1.94028	1.59193	0.0629621	2.03469	0.61179	-1.05598	1.61633	0.516747	2.0977	1.89532	1.21375	1.42098	0.535348	2.16186	-0.523681	-0.0167909	0.807763	1.50526	1.5205	1.03071	1.9723	1.40814	1.48161	1.77211	0.236461	15.7149	9.45766
TCGA.GV.A3JZ.01	-0.381273	0.179216	-0.558861	-0.23306	-0.420134	0.781818	-0.680402	-0.527261	-0.301941	-0.878508	-1.12178	0.862733	-0.691664	-1.98598	-0.693689	0.564806	-0.359852	0.267154	0.909217	-0.14931	-0.0855971	-1.02738	-0.983858	-0.389167	-0.589813	-0.176253	-1.44478	1.51254	-5.27689	-3.14557
TCGA.DK.A1AA.01	-0.7335	-1.15543	-0.714548	-0.560109	0.938206	-0.459567	0.305089	-0.282008	-0.449762	-0.332467	0.452643	0.22853	-0.453302	0.708455	-0.184974	-0.100513	-0.896765	-0.501492	0.264458	0.0361833	-0.632581	-0.126834	-0.601608	-0.452175	-0.643349	-0.56932	-0.209376	0.424917	-3.62613	-1.58855
TCGA.E7.A541.01	0.248631	0.695057	1.10864	-0.0879737	0.07085	0.547936	0.156379	0.146194	-0.0675349	0.642212	-0.33796	-0.11514	0.508373	-0.459898	0.118577	0.110714	0.177033	0.623454	0.0405383	0.298902	-0.174842	0.00748241	-0.477848	-0.153018	0.316007	0.124489	-0.415246	0.732919	2.49713	0.493184
TCGA.DK.A6AV.01	0.353031	0.306664	0.168774	-0.351302	1.6479	1.25811	-1.01412	-0.504272	-1.08387	-0.456021	0.682052	-0.361216	0.0502339	-0.334817	-0.530684	-0.591324	-0.260391	0.270126	-0.0160212	-0.796684	-1.09129	-0.686628	0.357071	-0.598767	-0.243015	-0.158671	-1.29429	-0.0589626	-4.62719	-0.855066
TCGA.E7.A5KF.01	-1.04105	-1.29614	-1.15245	-1.81396	-0.0307571	-0.92505	-0.961557	-1.35407	-0.598587	-0.913143	-0.469074	-0.500655	-0.914596	-0.504131	-0.938424	-0.939131	-1.45853	-2.14448	0.748898	-1.39185	-1.66965	-0.00498832	-2.14307	-1.47785	-1.9627	-1.16533	-0.51316	-0.35693	-12.8607	-7.6659
TCGA.GD.A2C5.01	-0.772652	-0.548969	-0.512416	-0.762369	0.00085984	0.432703	0.720847	0.234844	0.0916174	-0.802626	0.232125	-0.827286	-0.400838	1.6624	-0.120627	0.213417	-0.928624	-1.66353	0.594585	-0.0096588	-0.725036	0.108961	-0.312389	-0.448248	0.259368	-0.466688	0.172088	0.292587	-2.60751	0.68676
TCGA.YF.AA3L.01	-0.435214	-1.69044	-0.550868	-0.650626	0.329479	0.851483	-1.23595	-0.886425	-1.61063	-0.14165	-1.02541	0.135128	-1.04066	-0.284794	-0.0887929	-0.95994	-0.601994	0.582758	1.2795	-0.77223	-1.20126	-0.4699	-0.483316	-0.693928	-0.488998	-1.02204	1.35846	-1.45634	-8.07417	-3.22758
TCGA.DK.AA74.01	0.75173	0.61054	1.94022	1.3368	1.16585	1.33841	1.24764	1.49863	0.0832138	1.71904	-0.0420213	2.64276	0.720943	0.35473	2.42474	1.16255	1.89912	0.176771	0.946477	1.82376	1.81679	1.62168	0.770779	2.04159	1.8703	1.88539	1.18562	0.924364	16.3135	10.9091
TCGA.FD.A3N6.01	-0.114025	0.157622	-0.0442294	-0.206389	0.808914	-1.66741	0.115356	-0.947658	0.0335117	0.791514	-0.955629	0.0190836	-0.232902	0.712901	-1.20204	-1.01402	-0.241469	-1.01392	-1.80744	-1.02956	0.297131	2.31468	-0.323151	-0.302697	-0.580497	-0.671316	-0.898667	0.814649	-1.59377	-0.209213
TCGA.DK.AA6R.01	-0.186079	0.401195	-0.016349	-0.730387	0.120514	0.898781	-0.0510003	-0.40902	-0.916579	0.0495205	-0.667619	0.0102739	-0.274329	-0.513487	-0.921693	-0.283278	-0.374961	1.4207	-2.03066	0.111081	0.200858	2.18297	0.881088	-0.121036	0.225189	-0.266762	1.14496	0.128201	-0.361965	1.97689
TCGA.4Z.AA89.01	-0.794471	-0.568379	-0.543732	-0.394257	1.13297	-0.424929	-0.863443	-0.666558	-1.05628	-0.305036	0.0279365	-0.111075	-0.831954	-0.109449	-0.840156	-1.14078	-0.801053	-1.06354	-0.562026	-0.811003	-1.36945	-1.2298	-1.63293	-1.33654	-0.860672	-1.01192	-1.27846	-0.713855	-7.73554	-7.08871
TCGA.BT.A20X.01	-0.0771173	0.377264	-0.0248519	0.434736	-0.244406	-1.68261	0.589785	0.243721	0.283546	0.0145278	-0.398461	0.672331	-0.474418	0.983619	-0.960976	-0.54296	0.18879	-0.412838	-0.75085	-0.232899	0.67278	1.00626	-0.0068505	0.364241	-1.14458	0.109395	-0.253629	0.186884	1.96997	0.0793598
TCGA.DK.A1AB.01	0.306215	0.579197	-0.433736	0.993014	-0.17091	-0.137577	0.493649	0.935271	0.415722	1.10931	0.675173	0.529636	0.559548	0.265475	0.339141	0.245566	0.866318	1.20805	-1.36212	0.963914	1.03674	0.945979	1.00847	0.757332	0.348265	0.844572	0.685944	0.712455	7.45269	4.75759
TCGA.DK.A3IU.01	3.36192	1.34634	2.5955	1.88768	0.003652	-1.02034	1.97626	1.19474	2.72093	2.09261	0.409642	1.53053	3.06732	0.435627	1.4818	1.16989	2.44393	2.52166	0.81609	1.83079	1.65115	1.06192	1.30421	1.68825	2.74226	2.27709	0.511012	0.583082	18.4016	7.53456
TCGA.C4.A0F0.01	0.0663329	0.891159	0.437229	0.373614	0.878824	0.367136	-0.136774	0.0607181	0.979776	-0.255102	-1.10188	0.908613	0.284516	0.512593	0.33713	0.269062	0.278005	1.80583	-0.201844	-0.163402	1.16325	0.799385	-0.37985	1.22875	-0.417631	0.349848	-0.727007	0.690998	3.85214	3.83414
TCGA.GC.A6I3.01	0.920783	0.156855	1.82799	0.14755	0.365968	2.32603	0.276643	0.134431	-0.995581	0.830255	-0.161894	1.21479	0.90742	-0.907398	0.846511	0.0261948	1.0228	-0.411221	1.70074	-0.428197	0.0347074	-1.00092	-0.32749	0.123701	0.228936	0.292941	-1.18485	-0.776875	1.45871	0.980334
TCGA.XF.A9SV.01	-0.638704	-0.443062	-0.643191	-0.562128	0.635108	0.468667	0.102225	0.963075	0.44915	-0.68604	-1.07713	-0.647226	-0.429187	0.868273	-0.348408	-0.275308	-0.359472	0.123116	0.963306	0.141102	-0.763981	-0.855233	0.355623	-0.366167	0.273001	-0.650411	-1.43123	-1.01203	-2.88938	-1.24875
TCGA.FD.A62N.01	2.33751	1.58015	3.41048	1.8111	1.41608	2.55796	1.29788	1.74277	0.551984	2.43223	0.695266	2.04656	2.272	0.301886	2.54947	1.53819	2.75824	1.53132	1.40573	2.10971	2.20839	0.986931	1.17417	2.99801	2.92355	2.84973	0.2278	1.27164	18.6278	11.7346
TCGA.FD.A6TA.01	0.778552	-0.329838	0.281186	0.717953	0.43536	0.82984	0.85792	1.5547	0.365903	0.945095	0.417723	0.323562	0.745631	0.172365	0.817594	0.756547	0.900766	-0.655145	0.474458	0.169366	0.498663	0.0646273	0.788168	0.299065	1.13445	0.770668	-1.49573	0.73722	4.77124	4.60965
TCGA.DK.A3WY.01	5.63035	2.69535	2.46415	1.75562	0.867511	0.055286	1.10295	-0.404819	1.982	2.05238	1.32061	0.282804	5.3534	-0.37946	1.65327	0.699004	1.87301	4.3838	1.83179	1.00086	1.84557	-0.280603	1.22803	1.5078	2.1682	2.5308	-1.15488	0.111203	14.9948	5.76853
TCGA.XF.AAMR.01	-0.121747	-1.52975	-1.08352	0.0167541	-0.393859	-0.803505	0.58705	1.27127	1.70815	0.12995	0.526187	0.248217	0.0543793	1.68138	0.428851	1.17665	-0.272316	-0.691318	-1.20019	0.781732	-0.0762586	-0.337149	1.32145	0.449396	0.186457	0.350673	0.147669	0.177283	1.90986	2.64538
TCGA.FD.A6TF.01	0.596329	-0.697992	-0.470158	-0.236228	-1.5215	-1.18219	-0.134157	0.199393	0.948907	-0.361854	-0.171448	0.392365	0.148469	0.659082	0.502311	0.6829	0.256447	0.688066	-0.295182	0.519068	0.552457	0.0392956	0.960782	0.303422	0.518158	0.556359	-0.305197	-0.210218	-0.9509	1.32893
TCGA.CF.A3MF.01	-0.764914	-1.51647	-0.558637	-1.73987	-1.35995	1.09297	-0.563027	-1.54277	-0.786188	-1.68297	-0.163619	-1.30608	-0.718472	-1.03636	-1.27149	-1.22537	-0.784955	-1.25232	-0.00273441	-1.60278	-1.43982	-0.468345	-1.23514	-1.47333	-0.559762	-2.01732	0.910611	-1.38367	-13.8819	-6.56032
TCGA.5N.A9KI.01	0.150745	-0.646904	-0.322127	0.990408	-0.0418903	-0.336464	0.528432	0.497882	0.199337	0.250686	-0.424425	-0.153541	0.0511388	0.217973	0.51524	0.726306	0.53139	-1.32514	1.04786	0.911756	0.254539	0.787771	0.205422	-0.0614106	-0.0703014	0.55631	1.39902	-0.875762	4.57745	0.98416
TCGA.ZF.AA4X.01	-0.563286	-0.0506298	-0.841921	-0.760336	-0.59815	0.32043	-1.78981	-1.10821	-0.91224	-0.313727	-1.41581	-0.549729	-0.763079	0.123036	-1.26579	-0.492662	-1.28979	-0.782261	0.690875	-0.588548	-1.2923	-0.153457	-0.329593	-1.58213	-1.02906	-0.941533	-1.01401	-0.540368	-10.2114	-4.71766
TCGA.E5.A4TZ.01	-0.367235	-0.175846	-1.15803	-0.893311	-0.319163	-0.217461	-0.915011	-0.76108	-0.196211	-0.491701	0.0309779	-1.50977	-0.402586	-0.40968	-1.18878	-0.940521	-0.476619	0.960694	-1.3246	-1.08426	-1.24096	1.07466	0.0686625	-0.917756	-0.0662222	-1.43671	0.464402	-0.628202	-8.20788	-2.69518
TCGA.BL.A13J.01	-0.962291	0.48677	-0.863053	-0.850635	-0.768511	-0.134656	-0.0640507	0.699039	-0.216152	-0.551625	0.0230588	0.50048	-0.336973	1.07294	-0.605656	0.458817	-0.0679165	1.42257	-0.324678	-0.53328	-0.240863	-0.873825	-0.524786	-0.327	-0.494342	0.176921	0.215565	0.924424	-2.50987	-0.536476
TCGA.DK.A1A6.01	-0.577297	1.75039	0.851003	0.722829	-0.065366	-0.946055	-0.317157	0.56367	0.91578	0.145861	-0.216264	0.542611	0.371697	-0.436344	-0.264108	-0.182982	0.390169	-1.39495	-0.829155	0.164519	-0.416546	0.52908	-0.499503	0.220514	0.223203	-0.158377	-0.412372	-0.323265	3.74423	-1.32951
TCGA.ZF.A9R0.01	-0.264903	-0.445875	-0.465392	-0.210999	0.0655876	0.329401	0.236131	-0.221186	1.54006	-0.299574	0.280088	-0.706535	-0.212626	0.0148844	-0.97788	-0.966452	-0.607964	-0.0354443	-0.255997	-0.0715477	-1.08321	-1.665	-1.40231	-0.718845	0.266709	-0.416337	0.863001	-1.86087	-0.50934	-6.88858
TCGA.ZF.AA51.01	0.348439	0.604575	0.662641	0.628735	-0.409737	1.02456	0.65015	0.0561808	-0.780144	0.29692	0.425022	0.919893	0.464747	1.61247	0.171224	0.256146	0.880602	0.401625	1.28911	0.917726	0.414015	0.882565	0.804612	0.330933	0.782995	0.876989	1.1918	0.0139719	5.10985	5.72094
TCGA.G2.A2ES.01	-0.125659	1.34918	0.20332	1.30658	1.24498	-0.357644	0.0171472	0.911893	-0.846803	0.987906	1.03651	-0.0575269	0.651291	0.883843	0.302514	0.340979	0.813097	-0.442749	-0.790553	0.047883	0.708255	2.57763	-0.603818	0.351167	0.494481	0.172088	2.81897	1.64138	8.10243	5.03054
TCGA.CU.A0YO.01	0.140835	0.0899581	-0.345632	0.573583	-0.244143	0.620701	0.00666847	0.62187	0.624776	0.816471	1.57508	-0.286899	0.210773	-0.923046	0.0403892	0.834917	-0.00632011	0.656771	1.28742	1.02055	-0.0446705	-0.00958987	0.733314	-0.253188	0.359417	0.318551	0.253496	0.861499	3.69147	1.06376
TCGA.GC.A3OO.01	-0.0921217	-0.450984	-0.983107	-0.15388	-0.942877	-0.718447	0.241761	1.08664	0.287571	0.0118508	-0.0530863	0.568796	-0.0159845	1.08459	0.23748	0.693713	-0.132119	0.336403	0.560467	0.980517	0.477856	-0.506014	0.462938	0.19737	0.23189	-0.201325	-0.981371	1.5347	-0.627345	2.1605
TCGA.DK.A6B6.01	0.185945	0.0220773	1.16868	-0.101946	0.672473	0.685699	-0.0632965	-0.43624	-0.243891	0.723668	-0.953516	0.103568	0.369309	-1.18632	-0.140667	-0.841987	-0.080985	-2.06814	1.67674	-0.836069	-0.608292	-0.301764	-0.738516	-0.757753	-0.560587	-0.0935962	1.37837	-1.02236	1.58194	-3.54267
TCGA.BT.A20T.01	-0.382034	-0.114538	0.31382	0.62074	1.2041	-0.0399149	0.678009	0.496144	-0.226349	0.749925	0.631728	1.01064	-0.074514	-0.298406	-0.00915405	-0.535483	0.404275	-0.937783	1.44913	0.769152	0.129558	-0.184344	-0.416046	-0.376091	0.0430638	0.340387	0.019688	0.222056	4.98063	-0.697625
TCGA.K4.A6FZ.01	-0.0853029	0.893577	-0.456282	1.14045	2.01697	0.825482	0.238591	0.638856	-0.946222	0.80543	0.527022	0.763239	0.423694	1.59228	0.39569	0.583834	0.506823	0.718136	0.71984	0.757627	0.721815	1.93838	0.303787	0.788948	0.0468446	0.245415	1.10488	0.986139	7.14414	7.33753
TCGA.G2.A2EJ.01	-0.17727	0.973791	-0.021814	0.797652	0.813561	-1.75855	-0.442485	-0.491316	-0.377842	-0.11018	-1.0507	0.24467	0.293416	-0.0336286	-0.909296	-1.3357	0.132476	0.633314	-0.707075	-0.264826	0.419669	2.90087	0.15242	0.330961	-0.257731	0.0359598	2.02178	0.753896	3.33217	0.668279
TCGA.DK.A2I6.01	-0.5638	0.625101	-0.673379	-0.307845	-0.0933925	-0.882585	-0.758997	-1.54344	-2.09064	-0.657186	-1.38924	-1.24913	-0.398654	0.482355	-0.223433	0.15048	-0.380887	-1.00508	-1.80741	-0.594896	-0.148324	-0.685702	-0.487067	-0.75031	-1.09279	-0.678995	-0.517207	-1.24225	-7.34856	-4.16988
TCGA.XF.A8HE.01	0.253843	1.68092	0.579552	1.14805	0.257307	-0.548663	0.23671	1.29299	0.823896	0.821879	-0.553465	0.863302	0.768256	1.25504	0.357311	-0.109988	0.88357	0.369166	-0.137378	0.710824	0.620519	2.4547	-0.452251	0.39157	-0.0587204	0.561261	0.597373	0.850637	9.33127	4.73721
TCGA.XF.A9SI.01	2.93959	2.04631	2.91787	1.99296	-0.533137	0.437494	1.2493	-0.209947	1.49028	1.87855	1.10158	0.204987	2.60453	0.427275	1.41169	0.4863	1.54517	1.02413	1.908	1.77074	1.10915	-0.374461	0.983714	1.47801	1.6947	1.89915	-0.74315	0.156644	13.9039	6.06554
TCGA.XF.A9T5.01	1.028	1.86059	1.81789	1.71381	0.150682	1.09057	1.12664	0.267941	0.936734	1.27741	0.747271	0.428061	1.21956	-0.228931	0.671977	-0.133473	1.69061	-0.087033	0.414862	1.09499	0.851664	0.0178342	0.0242321	1.58619	1.05529	1.15354	0.250844	-0.617832	12.5027	4.23465
TCGA.XF.AAN7.01	-0.305644	0.219267	-0.981393	-0.642461	-0.807608	0.333935	-0.828335	-0.958687	2.03253	-0.380033	-0.00175322	0.259339	-0.206044	-1.88315	0.338984	0.200845	-0.354689	2.91306	-1.8431	0.0272919	0.562427	-0.709205	0.705751	0.0233676	0.135808	-1.03808	-2.3886	1.40924	-4.82761	-0.135774
TCGA.DK.A2I1.01	1.00336	0.646403	0.533428	0.482367	0.227079	1.47064	0.123791	1.50836	-0.00409513	0.346223	-0.22897	1.55186	0.729666	-0.225486	0.844638	0.681856	0.933749	-0.640141	1.1537	0.107866	0.317723	-0.428589	1.03069	0.57077	1.16401	0.56566	0.244505	-0.672723	5.0993	3.52369
TCGA.BT.A0YX.01	0.202879	0.793675	0.557593	0.510032	0.789464	0.295759	-0.159314	0.401642	-0.335792	0.626815	0.363127	-0.102706	0.453176	1.94005	-0.201236	0.0285332	0.644262	-0.0905803	-0.410173	0.250867	0.0631338	1.20076	0.487314	0.44004	0.183622	0.364925	1.34817	0.368146	5.21121	5.17509
TCGA.DK.A1AF.01	0.74107	0.50853	0.383808	1.62213	0.0763335	0.296319	1.12854	2.95834	1.58361	1.24768	1.60498	1.69422	0.79643	0.732074	1.60702	1.78194	1.15845	1.11787	2.07345	1.58167	1.58244	1.90578	2.03462	1.41189	1.39168	1.59957	0.898741	2.07934	14.213	11.1115
TCGA.XF.A9SX.01	0.705901	0.560146	1.29624	1.2237	-0.44079	0.00919048	0.797259	1.31991	-0.639123	1.48915	0.971187	1.67608	1.05311	0.784677	1.62324	0.841355	1.46436	0.429521	0.256308	1.38445	1.56895	0.204358	1.27179	1.42437	1.41753	1.2154	-0.123869	-0.626112	9.65143	6.15587
TCGA.UY.A9PF.01	0.307258	0.0218226	-0.00868951	-0.321306	-0.162155	-0.15529	-0.572751	-0.32276	-0.0851372	-0.343253	2.2957	0.0785234	0.225468	-0.193373	-0.0046183	1.92452	-0.569245	0.0186953	-0.0825429	-0.256815	-0.352958	-0.783302	0.0021575	-0.203579	0.506666	0.145631	0.216904	0.0914739	-2.04147	-1.81578
TCGA.K4.A3WV.01	-0.822202	-0.763257	-1.59835	-0.794352	0.386949	1.12004	-1.85582	-1.19592	-1.50755	-1.35868	-0.680173	-1.59778	-0.934025	-0.323239	-2.13347	-1.53039	-1.908	-0.90472	-1.85795	-0.503008	-0.565573	-0.0644787	-0.897211	-1.02495	-1.44392	-1.39482	1.93836	-0.592299	-9.21202	-5.69013
TCGA.E7.A8O7.01	0.282904	-0.631837	-0.329502	0.853106	-0.00471276	0.331339	-0.0530316	-0.466927	0.685915	0.258574	-0.303149	-0.345602	-0.0882012	0.166104	-0.228707	-0.296913	-0.0645418	-0.436983	1.3606	0.0788408	-0.245069	0.319972	-0.00362698	-0.628386	-0.364634	-0.421943	2.55739	-0.576909	1.72341	-0.684756
TCGA.FD.A5BY.01	-0.670011	0.184984	-0.435446	-0.0296806	0.212707	1.60447	0.991645	0.60152	-0.677528	-0.0931099	0.15876	0.472113	-0.542951	1.08637	0.190036	0.26334	0.0885526	0.507749	-1.6825	0.92657	0.444791	-0.0603138	-0.163821	-0.0796371	0.161541	-0.134976	-0.500206	0.277098	1.49127	2.94276
TCGA.BT.A20V.01	-0.181002	1.17579	0.0171588	0.385689	-0.0232866	-0.900363	-0.261125	-1.29345	-0.685252	-0.442337	-0.743617	-1.58055	-0.216481	1.10551	0.107789	-0.387413	-0.469004	0.369324	0.444209	-0.664196	0.686576	0.062752	-0.912208	-0.288348	-1.03302	-0.602406	1.35436	0.410691	-0.35248	-0.883185
TCGA.ZF.AA4U.01	-1.23274	-1.35024	-0.662844	-0.924417	0.196191	0.320864	-0.566222	-0.886157	-1.71117	-0.331949	-0.832391	0.0264658	-0.996941	-0.315507	-1.41469	-1.37763	-0.825643	-0.401027	-0.773302	-0.667491	-1.32299	-1.20618	-0.396422	-1.30154	-1.24962	-1.00409	-1.44894	-1.06392	-10.6803	-6.20304
TCGA.PQ.A6FI.01	-0.103166	0.759258	0.243206	0.736487	1.09992	-0.596288	-0.717745	-0.619123	-0.502808	0.19701	-1.33457	-0.184169	-0.210868	-0.138596	-0.74879	-1.47546	0.124278	0.350642	-1.11511	-0.434545	0.933285	1.52815	0.148049	0.220356	-0.157196	-0.430248	-1.02762	0.509913	0.237074	1.04708
TCGA.FJ.A3Z7.01	-0.741649	-0.486148	-0.585024	-0.942058	-0.577056	0.160582	-1.29991	-0.574711	0.521767	0.0469499	0.713624	-1.89252	-0.77451	-1.06044	0.0687337	0.66931	-0.282045	-0.995699	0.00724229	0.603114	0.273446	1.51239	0.325803	-0.417912	0.183715	0.528277	2.41308	0.315993	-0.491357	0.623114
TCGA.DK.A3IM.01	-0.686711	0.0839421	-0.974511	-0.601976	0.867784	-0.505033	-1.34688	-0.958444	-1.03473	-0.821361	-1.76662	0.155831	-0.874703	0.492831	-1.22014	-1.96295	-0.460263	0.0480691	-1.47247	-1.59533	-0.10214	1.46427	-0.679693	-0.706623	-1.23979	-0.895257	-0.146308	0.0715161	-7.52522	-1.54313
TCGA.ZF.AA4T.01	-0.686426	0.0165306	-0.979486	-1.69506	-0.932303	0.991994	-2.4223	-1.08054	-1.19264	-0.888952	-1.15571	-0.693999	-1.15726	0.574744	-0.846038	-1.23404	-1.1022	-0.51988	-0.00912202	-0.512022	-0.997983	-0.674925	-1.49933	-1.64186	-0.90905	-0.650193	0.382927	-0.480758	-10.5297	-4.67838
TCGA.G2.A2EL.01	-1.04914	0.109634	-1.16285	-1.83704	-0.740269	-3.22467	-3.25146	-2.96455	-0.163234	-2.59664	-1.24588	-2.71033	-1.35421	-2.15352	-2.33918	-2.78081	-1.87414	-3.58118	-1.94286	-0.227209	-1.58922	-1.71248	-1.81676	-1.23077	-2.67781	-3.04243	-1.63667	-1.29127	-15.2469	-13.9254
TCGA.FD.A5BS.01	3.16511	1.74024	3.64308	2.70189	1.09253	1.67886	1.86651	1.11393	1.72168	2.53686	1.57678	1.63672	2.71891	-0.0432124	2.62326	1.71424	2.73858	1.46572	2.60528	1.78192	2.41003	0.735952	1.51245	2.74631	2.10052	2.89078	0.336424	-0.318018	19.6532	9.56603
TCGA.FD.A6TC.01	-0.929342	-0.479302	-1.04764	0.50443	0.604235	0.337691	0.361379	0.610673	0.576269	-0.200521	-0.63308	-0.489511	-0.64726	0.446616	-0.463732	0.240349	0.00352064	0.185822	-0.520761	0.644259	-0.129084	0.140302	0.214103	0.130704	0.261435	-0.0471183	-0.565754	-1.44175	0.831829	-0.632546
TCGA.DK.A3X2.01	-1.31694	0.498015	-1.26525	-0.795803	-0.894411	-0.862323	-1.76244	-0.233225	-1.06369	-1.47146	-0.614283	-0.825265	-0.996905	-0.132219	-1.5143	-1.087	-0.933128	2.42522	-0.27286	-1.13116	-1.18046	-0.521802	-1.10832	-0.885248	-1.34916	-1.07382	-2.58596	-0.437984	-12.3737	-6.39533
TCGA.UY.A78N.01	-1.03066	0.34989	-1.116	-1.32332	-0.843539	-0.969945	-1.62482	-1.04393	-0.0375736	-2.17458	-1.80652	-1.09036	-1.00976	-0.371429	-1.52712	-1.23306	-1.5887	1.23701	-0.042202	-1.2587	-1.46053	-1.78918	-1.9631	-1.09522	-1.45074	-0.860646	-2.00181	0.179497	-13.2192	-9.12519
TCGA.FD.A3SS.01	-0.774842	-0.0907333	-1.39555	-0.560294	-1.44714	-3.07339	-1.23031	-0.528988	0.442319	-0.690287	-0.425412	0.0731491	-1.11277	-0.112511	-0.960709	-0.591965	-0.951499	0.440362	-1.17178	-0.104186	-0.00526823	0.405392	0.432758	-0.775332	-0.946427	-0.874316	-0.883818	-0.379612	-7.36856	-4.34151
TCGA.4Z.AA7R.01	-0.942338	-0.784397	-1.13592	-1.55926	-0.532932	-0.419569	-0.0664453	-0.765758	-0.812628	-1.91327	-0.59635	0.031249	-1.08597	-0.101635	-0.858764	-0.0697031	-1.14711	-0.161723	-0.0386314	-1.02708	-0.811018	-0.4937	-1.52668	-0.929527	-1.95453	-0.884934	-1.63547	0.348919	-11.9291	-5.12806
TCGA.DK.A1A3.01	0.143135	0.0678517	0.357113	0.371169	-0.904312	-1.5861	-1.29488	0.644738	0.324963	0.0209948	-0.0536061	0.393803	0.343833	-0.385599	0.39301	0.50614	0.416478	-1.60021	0.26583	0.477503	-0.103235	0.356134	0.498224	0.363173	0.91009	0.770233	-0.524931	0.181861	0.207207	0.237181
TCGA.E7.A85H.01	-0.00651503	0.820382	0.1877	-0.0550405	-0.366853	0.968538	-1.20632	-0.156158	0.0974658	-0.132959	-0.616178	-0.124207	-0.0335545	-2.28338	0.0665504	-0.951679	-0.47323	-0.623825	0.539509	-0.475535	-0.746705	-0.970572	-0.210656	-0.427093	-0.392492	-0.0372371	1.16087	-0.929134	-0.910388	-3.9756
TCGA.DK.AA6X.01	0.324007	-0.627593	-0.375205	0.0792458	0.532811	-0.229864	0.931532	0.784071	1.05187	0.0553346	-0.522057	-0.328703	0.703877	1.699	0.627984	-0.718137	-0.0436493	-0.244455	0.577664	0.730161	0.0778745	0.121042	0.906438	0.266607	-0.407071	-0.198593	-0.0348085	-0.262851	3.0067	3.08471
TCGA.CF.A27C.01	-0.93819	-1.35031	-0.792525	-1.51375	0.377042	0.131814	-1.12553	-0.606878	-0.699161	-0.870214	-0.234655	-0.319124	-0.867326	-1.49693	-1.14967	-1.29688	-1.20008	-1.10334	-0.0356775	-0.883901	-1.29528	-0.811695	-0.739886	-1.33052	-0.95926	-1.45994	0.0970471	-1.12182	-10.1234	-7.7188
TCGA.KQ.A41N.01	-1.11762	-0.355257	-0.917184	-1.13911	0.4183	0.0499062	-1.3788	-1.50892	-1.10443	-1.69293	-0.131759	-1.06218	-1.36622	-0.912211	-1.36992	-0.0131623	-1.48337	-1.59928	0.0894349	-1.0784	-0.723847	-1.18825	-1.0321	-1.17359	-1.24669	-1.47462	-0.27654	-0.254486	-11.2318	-7.36403
TCGA.XF.A9SK.01	-0.140943	-1.07337	-0.109743	1.04711	0.481073	1.53307	1.4293	1.63424	0.918658	0.600606	-0.591818	-1.16157	0.316874	0.918224	1.14005	0.540376	0.934795	-1.16245	-0.0123285	0.867618	0.428959	-0.462768	0.695336	0.668775	0.793124	0.102303	1.14558	-1.93154	7.47234	3.49595
TCGA.ZF.A9R4.01	-0.398606	-0.193936	0.212972	-0.779802	-0.643357	-0.641888	-1.29006	-0.525154	-0.647114	-0.0358096	-1.14287	-0.928477	0.0379406	-2.13748	-0.816781	-0.498843	-0.81896	0.0451934	-1.06265	-1.59147	-0.75569	-1.37822	-0.831861	-0.208078	-0.144616	-0.467471	0.0125313	-1.43234	-6.70436	-8.12813
TCGA.FJ.A3ZE.01	-1.25251	-1.08064	-1.21923	-1.35928	-0.867282	-0.49391	-1.75677	-0.946792	-0.901137	-1.67256	-0.657862	-1.33194	-1.25637	-0.618234	-1.30915	-1.45911	-1.03074	-0.685753	-0.82017	-2.09492	-1.54252	-1.22005	-2.0189	-1.72036	-0.761833	-1.23214	-0.151158	-0.685518	-14.7295	-9.07797
TCGA.GD.A76B.01	0.864894	0.235219	0.87578	1.19994	0.0517105	0.317028	0.32682	-0.15751	0.153784	0.954016	0.664329	0.438506	0.742301	0.23016	0.122792	0.134997	0.49706	-0.239442	1.37887	-0.275947	-0.230187	-0.320329	-0.0685939	0.25499	0.433162	0.453475	0.501472	-0.79228	4.08857	0.240827
TCGA.G2.A3IE.01	-0.265683	-0.564943	-0.564416	-1.20537	1.63255	-0.990917	-1.18995	-0.951758	-1.0227	-0.806553	-0.54681	-0.575959	-0.723701	-0.484161	-0.665244	-0.835837	-0.724934	-0.687628	0.695131	-2.06544	-1.41399	-1.05591	-1.07653	-1.01175	-0.741529	-0.646699	0.786405	-2.54534	-7.94742	-8.00944
TCGA.BT.A20Q.01	0.286302	-0.788388	0.138116	0.546539	0.868987	1.13354	0.840638	1.53183	0.926195	0.676534	-0.729651	0.264355	0.358618	1.18617	0.350953	-0.155352	0.621181	-0.556256	0.07858	0.564462	0.0246516	-0.649503	0.663088	0.323535	0.276206	0.184978	0.108014	-0.208702	5.62256	3.42026
TCGA.XF.A9SM.01	0.828514	1.96684	2.33346	1.49428	1.10871	0.0292548	2.36959	0.401052	0.553366	1.56287	0.193077	1.67237	1.4385	0.598871	1.70754	0.559616	1.95978	0.358197	-0.124728	1.67563	1.52033	0.689417	0.392813	2.08515	1.66545	1.66844	0.500663	1.12732	16.4522	8.50501
TCGA.FD.A5BX.01	-0.128822	0.0431359	0.619644	1.09744	1.60894	1.79444	1.56828	0.719152	1.09916	1.00643	1.79384	1.39294	0.449355	0.226433	2.33117	1.11875	1.03896	1.9458	1.41871	0.950411	1.72681	0.114739	1.19763	1.3077	2.13266	0.944702	0.374232	0.325923	11.7583	8.00583
TCGA.DK.A2I4.01	1.01168	1.74101	2.39046	1.93968	0.672568	1.68098	1.24316	1.9556	1.26566	2.2866	1.42333	2.72525	1.61746	1.08073	2.39261	1.95803	2.12482	1.22085	1.49083	2.37696	2.33977	0.759976	1.48396	2.23282	2.61286	2.48017	0.529511	1.82808	19.3472	12.8337
TCGA.FD.A3B3.01	1.17927	1.96721	1.54823	1.21601	1.06233	-0.471052	1.44001	1.06947	1.69218	1.27898	1.02619	0.970758	1.5602	1.33414	0.98697	0.914073	1.64556	1.31469	-0.0188195	1.19292	1.42992	1.91301	1.04175	1.2869	1.35769	1.34094	-0.749813	1.64692	14.4884	9.38419
TCGA.H4.A2HQ.01	-0.86138	-0.049838	-0.884595	-1.0928	-0.286486	1.13376	-0.527986	-1.15408	-1.62531	-1.01311	-0.122615	-0.931418	-0.703634	-1.46002	-1.19957	-0.443933	-0.904723	0.527168	-1.29729	-0.226932	-0.463054	-1.57647	-0.326879	-0.906339	-1.52168	-1.11191	-1.18612	0.316731	-9.62222	-4.9235
TCGA.4Z.AA7Y.01	-1.01977	-0.139662	-1.21621	-0.994014	1.12263	0.26332	-0.990628	-0.623086	0.149003	-0.867924	0.201928	-0.611582	-0.737689	0.865336	-0.568248	-0.804308	-1.43325	-0.556256	0.296438	0.648101	-0.802723	-1.26892	-1.12292	-0.688017	-0.774281	-1.10055	0.108069	1.09617	-4.70699	-2.85652
TCGA.FD.A5BV.01	-1.05341	-0.0274805	-0.431759	-1.18163	-0.310836	-0.649031	-0.169303	-0.672547	-0.72894	-1.26725	-0.171878	-0.216066	-0.913465	-1.33653	-1.59372	-0.278627	-1.52261	0.424161	0.874189	-0.430202	-0.125298	-0.578969	-0.59623	-0.859817	-1.20823	-0.621432	-1.01655	0.450759	-6.98323	-6.68615
TCGA.ZF.A9R3.01	-0.356008	-0.494068	-0.478483	-0.216014	0.545739	1.508	-0.108622	0.268647	-0.602274	-0.161022	0.352821	-0.764427	0.0292911	1.23543	-0.46501	-0.522303	-0.478206	-1.26792	0.225342	0.0628334	-0.567917	-0.268393	0.00695181	-0.628699	-0.608615	-0.526281	1.45692	-0.142042	-0.82054	0.768027
TCGA.UY.A78M.01	-0.721479	-0.386213	-0.258034	-0.608017	0.327441	0.585009	-0.0502105	0.0137825	-1.80186	-1.13477	-0.759458	-0.183996	-1.16916	-0.765762	-0.691422	-0.00253415	-0.147247	0.411935	0.675552	-0.921939	-0.633071	-0.749735	-0.972209	-0.617999	-0.205808	-0.484827	-0.860734	-1.03523	-6.79846	-4.39459
TCGA.BT.A20J.01	0.942203	1.74254	0.907982	1.14683	1.73554	0.317517	0.262973	0.0940451	0.888729	0.663122	1.3013	-0.359524	1.18774	0.0222666	2.01696	0.56186	1.15081	1.71598	1.69277	0.0590588	1.26418	-0.173966	0.173318	1.04251	0.220059	1.11014	0.595362	1.10055	10.4705	5.63301
TCGA.GD.A6C6.01	-0.35833	-1.44175	-0.13367	-0.960272	-0.24492	1.16916	-2.30558	-0.444059	-3.18578	-0.521026	-0.72487	1.67509	-0.828477	-2.7677	0.211674	-0.969864	-0.344347	-0.978654	0.764208	-1.45795	-1.03782	-0.655864	-1.44885	-0.422367	-1.43834	-1.11792	1.03743	-1.20135	-10.322	-4.69195
TCGA.XF.AAN2.01	-0.358471	0.766774	0.666042	0.416309	-0.506226	-1.11818	0.409757	0.549255	-0.838552	0.587448	-1.276	0.903698	0.423288	-0.290862	-0.232269	-0.330304	0.507629	-0.439344	-0.926721	0.55393	0.392227	1.13494	-0.0526739	0.299315	0.261219	0.470711	-0.699383	0.926983	2.76829	1.17488
TCGA.4Z.AA7O.01	-0.203593	0.986559	0.36345	-0.0226898	1.63841	-0.659856	0.0720533	0.0149211	0.494704	0.601011	0.496422	0.372554	0.039841	-0.491823	-0.262071	0.574556	0.030395	1.08012	0.704943	0.289329	-0.250646	-0.544975	-1.1514	-0.43374	0.116864	-0.191361	-1.03599	-0.0709532	2.95975	-3.58443
TCGA.DK.AA6L.01	-0.679542	-0.670673	-0.185077	1.01892	0.96883	1.19356	0.450803	0.26696	-0.425287	0.318227	-0.0189676	-0.496555	0.217953	0.0759754	-0.0106285	0.0933658	0.558865	0.180283	-1.07634	-0.069431	0.103084	-0.248755	-0.203888	0.257154	-0.225902	-0.420016	-0.326942	-0.957523	1.0294	0.664755
TCGA.XF.AAN1.01	-0.884183	-0.947707	-0.385693	-0.622975	0.786808	-0.0263349	0.25709	-0.478095	-1.01994	-0.651159	-0.977574	-0.945549	-0.65867	0.27901	-0.755276	-1.36907	-0.80532	-0.630285	0.130976	-0.821345	-1.02796	-0.930943	-1.1238	-0.892693	-0.429731	-1.23135	-0.122879	-0.403262	-6.26521	-4.65862
TCGA.BT.A42C.01	-0.624004	-0.0107785	-0.68489	-1.20176	0.673249	1.11976	-0.548924	-0.534192	-0.652937	-1.24937	0.00963538	0.168033	-0.804908	1.19017	-0.820697	-0.325976	-0.713985	-0.790675	-0.510233	-0.812983	-0.475106	-0.548235	-0.787539	-1.20083	-0.867806	-0.905234	0.666236	0.389075	-5.73668	-1.37228
TCGA.ZF.AA54.01	0.380984	1.17268	0.439777	1.2278	0.129604	0.796985	0.245515	1.33957	1.64063	1.45249	0.0443436	1.22437	1.06262	0.00400282	2.4441	0.559481	1.0398	2.08852	0.0859781	1.60881	1.76451	-0.322968	0.631142	2.18538	1.04879	0.960842	0.130715	0.533221	12.1129	6.68218
TCGA.K4.A3WU.01	2.2135	0.320312	0.719325	0.867491	0.0425241	0.734581	1.17375	0.439743	2.22495	0.689579	1.01738	-1.41023	1.80142	0.62332	0.429423	1.22926	1.16189	0.375645	1.8286	0.751442	0.362391	-0.0619072	2.16804	0.117502	1.14809	1.12272	-1.07816	-0.347643	7.41111	4.65716
TCGA.ZF.AA58.01	0.762941	2.03394	1.70448	1.47908	1.5055	-0.596948	0.249016	0.543747	0.658191	1.74828	0.0784471	1.26074	1.64589	0.852938	2.18479	0.410315	1.79276	0.443776	0.388394	2.05021	2.29027	0.534032	0.780322	2.34639	1.9248	2.02561	0.351002	1.02466	16.2393	8.38776
TCGA.ZF.AA4N.01	-0.392588	0.843349	-0.197643	0.828516	1.14885	1.016	0.184385	-0.455298	1.14388	0.463268	0.542653	-0.439218	-0.239702	0.241426	0.334311	0.331796	0.716325	0.294729	-0.13672	0.0401258	1.07591	0.538334	0.322952	0.94035	-0.122451	0.117499	0.718657	0.60586	5.9115	4.71555
TCGA.BL.A5ZZ.01	-0.186932	0.225048	-0.0412756	0.524043	0.618298	0.651473	0.705553	1.59215	1.57789	0.255293	1.45307	2.17877	-0.145627	0.146047	1.37846	1.74654	1.18368	0.669366	-0.119558	1.0879	1.6256	0.283438	2.34652	1.71242	1.1761	1.22361	-0.823266	1.22766	8.57085	8.58319
TCGA.CF.A7I0.01	-0.454971	-0.928044	-0.0941506	-0.967137	-0.214722	0.257423	-0.23161	-0.541697	0.131961	-0.789386	1.00962	-0.981381	-0.758189	-0.915964	-0.596016	0.24055	-0.729236	-0.221229	1.22539	-0.497566	-0.57525	-0.407856	-0.431689	-0.788027	0.219	-0.265843	-0.556578	-1.32e-05	-5.53002	-3.61138
TCGA.DK.A3IN.01	-0.0960668	0.25446	-0.482279	0.157675	0.139717	-0.31998	0.447174	0.975779	-0.915228	0.341886	-1.14015	1.99425	0.384657	0.848941	1.24069	0.0314523	0.906311	-0.261199	-0.00859685	1.24616	0.638413	0.209812	-0.318107	1.19011	0.698726	0.821015	0.651254	0.685274	4.27602	4.44306
TCGA.DK.A6B0.01	-0.937398	-1.7463	-0.521934	-0.642966	0.853877	-0.0887914	-0.0642975	-0.755341	-1.39622	-0.599524	-0.102378	0.307683	-1.03529	-0.599381	-0.338159	-1.05152	-0.894083	-0.832956	0.37563	-1.10079	-1.30708	-0.96619	-1.51228	-0.902516	-0.771324	-0.896571	-0.883467	-1.57955	-9.06061	-6.88094
TCGA.XF.AAN0.01	0.285774	0.396584	-0.190257	0.652605	-3.00022	-0.0465065	0.70465	0.182071	0.423621	0.649873	0.968355	-1.07493	0.390147	-0.102721	0.535685	0.169903	0.754494	1.19501	1.27553	1.29499	0.204766	0.517889	0.0349674	0.0911476	0.0804775	0.0748251	-0.0830161	0.731846	2.31071	2.5168
TCGA.E7.A4XJ.01	-0.915501	-0.943743	-0.783417	-1.54377	-0.479731	-0.00182856	-1.03677	-1.28106	-0.75923	-1.80707	0.486411	-1.87125	-1.00988	-0.0931434	-1.14481	-0.130148	-1.10647	-1.04077	0.540165	-1.48689	-1.95012	-1.12387	-0.735427	-1.0492	-1.04576	-1.13211	0.384024	-1.72807	-12.8199	-6.98283
TCGA.G2.AA3C.01	0.109272	-0.378002	0.00611083	0.804531	-0.520391	0.512068	0.614427	1.62382	0.48401	0.809149	-0.491143	1.71843	0.308233	0.662389	3.53172	0.821817	1.99541	0.126276	1.4554	0.643536	1.58776	1.11853	1.36857	1.97309	1.81377	0.53492	-0.328411	-1.65269	5.88146	7.97737
TCGA.HQ.A2OE.01	-0.427502	0.451784	-0.413624	-0.885398	-0.160788	0.546816	-1.93598	-0.252582	-0.196567	-1.7081	0.984886	-1.94896	-0.500619	-1.36127	-0.837334	0.134193	-0.777954	-0.122581	0.162861	-1.88953	-1.36274	-0.435528	-0.618285	-0.795225	-0.637772	-1.07534	0.652443	0.099937	-8.77642	-4.17884
TCGA.5N.A9KM.01	-0.409185	-0.886721	0.154471	0.735512	1.46001	-0.285418	0.041661	1.05198	1.05014	0.101187	0.268709	-0.939401	-0.0555332	2.9936	0.279297	0.489551	0.133925	-1.16422	-0.880854	0.224795	0.0119627	-0.810717	-0.251819	0.277912	0.206309	-0.386936	0.291722	-1.48684	3.84979	-0.143665
TCGA.FD.A6TK.01	0.570546	1.07476	0.677847	0.976007	-0.608066	-0.234194	1.4385	0.523949	0.329407	1.26585	-0.600499	0.96752	0.745701	-0.772643	1.5103	0.601387	1.02452	0.0265389	0.268788	1.63911	1.44122	0.482558	1.00671	1.01714	1.42176	1.25507	1.16752	0.605206	11.1812	4.6396
TCGA.UY.A8OB.01	-0.616235	0.00873738	0.616774	0.402407	0.587097	0.00215854	-0.814411	-1.29889	-0.892003	0.537635	-1.70694	1.30083	0.0405933	-0.227986	-0.487959	-0.365301	0.101448	-0.749902	-2.08804	0.18921	0.970869	0.650834	0.264155	0.536246	-0.149131	-0.496763	0.687411	1.09921	0.498072	1.9381
TCGA.DK.A3IQ.01	-0.560906	-2.20952	-1.53239	-0.272369	-1.71657	0.108572	1.56616	1.06293	1.35161	-0.0740652	-0.709998	-1.04073	-0.616899	-0.689013	0.568407	1.08343	0.047338	-0.399308	0.217494	0.859195	0.771502	-0.0260443	2.08518	0.262422	0.784036	0.346002	-0.59736	-0.115681	-0.235353	2.156
TCGA.FD.A6TG.01	0.592703	-0.702143	0.140312	-0.0153209	-1.79491	1.69529	-0.0565881	1.1044	0.636864	0.114356	-0.195945	0.349767	0.462157	0.203026	0.219214	0.283753	0.594976	0.263789	0.856906	0.606706	0.407164	-1.00699	1.27377	0.0571697	1.49993	0.370744	-0.978825	-0.406541	-0.167246	2.62992
TCGA.KQ.A41S.01	-0.659091	-0.21544	-0.971784	0.171627	-2.15379	-0.218044	-0.179505	1.12	-0.418824	0.0350637	1.1089	-0.192125	-0.503498	-0.258024	0.477452	1.08519	-0.111326	0.450416	0.0138374	0.68164	0.207512	0.162338	0.437561	-0.0706137	0.155036	0.48495	-0.237741	0.622881	-1.3225	1.04222
TCGA.LC.A66R.01	1.10847	2.13895	1.33479	0.439756	0.442358	-1.51926	1.40948	-0.173122	0.923828	0.909445	-0.504762	0.200701	1.28673	0.336692	0.512962	0.0226517	1.14612	-0.448916	-0.445549	0.732368	0.62878	1.87022	0.614144	1.27492	1.08219	0.938904	-0.11294	2.00794	9.47365	6.23579
TCGA.BL.A13I.01	0.221281	1.07899	0.92671	0.828971	-0.293755	-0.342841	0.927565	1.82069	3.05711	1.18355	0.730153	1.86915	1.14634	0.0866508	3.19849	1.67733	1.85352	0.68713	1.06428	0.869381	1.98855	0.720747	1.88225	2.17077	1.85856	0.975714	0.799528	0.565862	13.1059	8.76618
TCGA.FD.A3SO.01	0.246137	0.471042	-0.523485	0.745765	-0.0983025	-2.09688	0.477859	1.19093	0.724612	0.493922	-0.830373	1.45404	0.188111	0.975071	1.2828	0.0417521	0.877077	-0.152739	-1.42105	0.815345	0.65819	1.27461	0.37442	0.834739	1.00892	0.727555	-0.199229	0.71666	5.4842	4.33538
TCGA.BT.A2LD.01	0.079646	-0.254884	-0.290421	0.138238	-1.40693	-1.28133	-0.308787	-1.19448	0.234574	0.031398	-1.20831	-0.17521	0.0556491	-1.11568	-0.212382	-0.512295	0.319011	1.14517	-1.08657	0.224909	0.507801	1.6879	0.559807	-0.225184	0.250853	-0.345924	-0.400934	-1.09178	-3.06545	-1.35964

## Sheet: Table S4.
Enrichment of differentially enriched gene signaling pathways among the three m6A modification modes
Gene	original_id	2vs1	3vs1	3vs2	Gene ID	Type	Tax ID	Homologene Gene ID	Homologene Gene Tax ID	Gene Symbol	Description	Biological Process (GO)	Kinase Class (UniProt)	Protein Function (Protein Atlas)	Subcellular Location (Protein Atlas)	Drug (DrugBank)	Canonical Pathways_x000D_	Hallmark Gene Sets_x000D_	M5885 NABA MATRISOME ASSOCIATED	GO:0008544 epidermis development	GO:0019730 antimicrobial humoral response	GO:0030198 extracellular matrix organizat	M3468 NABA ECM REGULATORS	GO:0048598 embryonic morphogenesis	GO:0001501 skeletal system development	GO:0007389 pattern specification process	GO:0010817 regulation of hormone levels	GO:0030326 embryonic limb morphogenesis	R-HSA-6799990 Metal sequestration by antimic	GO:0030155 regulation of cell adhesion	GO:0061138 morphogenesis of a branching e	GO:0022617 extracellular matrix disassemb	GO:0001655 urogenital system development	R-HSA-211979 Eicosanoids	GO:0042445 hormone metabolic process	hsa04657 IL-17 signaling pathway	R-HSA-428359 Insulin-like Growth Factor-2 m	GO:0001568 blood vessel development	TotalEvidenceCount
4318	MMP9	1	0	1	4318	Gene_ID	H. sapiens	4318	H. sapiens	MMP9	matrix metallopeptidase 9	GO:2000697 negative regulation of epithelial cell differentiation involved in kidney development;GO:2001268 negative regulation of cysteine-type endopeptidase activity involved in apoptotic signaling pathway;GO:0051549 positive regulation of keratinocyte migration		Enzymes/{ENZYME proteins/Hydrolases,Peptidases/Metallopeptidases}	Cytosol(Approved)	Marimastat (Zinc ion binding);Minocycline (Zinc ion binding);Captopril (Zinc ion binding);Glucosamine (Zinc ion binding);2-Amino-N,3,3-Trimethylbutanamide (Zinc ion binding);2-{[Formyl(Hydroxy)Amino]Methyl}-4-Methylpentanoic Acid (Zinc ion binding);AE-941 (Zinc ion binding);PG-530742 (Zinc ion binding);5-(4-PHENOXYPHENYL)-5-(4-PYRIMIDIN-2-YLPIPERAZIN-1-YL)PYRIMIDINE-2,4,6(2H,3H)-TRIONE (Zinc ion …	(M63)PID AVB3 OPN PATHWAY; (M165)PID SYNDECAN 4 PATHWAY; (M65)PID FRA PATHWAY	(M5946)HALLMARK COAGULATION; (M5950)HALLMARK ALLOGRAFT REJECTION; (M5953)HALLMARK KRAS SIGNALING UP	1	1	0	1	1	1	1	0	0	0	0	0	0	1	1	0	0	1	0	0	2
6690	SPINK1	1	0	1	6690	Gene_ID	H. sapiens	6690	H. sapiens	SPINK1	serine peptidase inhibitor Kazal type 1	GO:0010751 negative regulation of nitric oxide mediated signal transduction;GO:1900004 negative regulation of serine-type endopeptidase activity;GO:0090281 negative regulation of calcium ion import							0	0	0	0	1	0	0	0	0	1	0	0	0	0	0	0	0	0	0	0	2
646	BNC1	1	0	1	646	Gene_ID	H. sapiens	646	H. sapiens	BNC1	basonuclin 1	GO:0007283 spermatogenesis;GO:0048232 male gamete generation;GO:0008544 epidermis development		Transcription factors/Zinc-coordinating DNA-binding domains	Nucleoplasm(Enhanced)				0	1	0	0	0	0	0	0	0	0	0	0	0	0	0	0	0	0	0	0	2
11202	KLK8	1	0	1	11202	Gene_ID	H. sapiens	11202	H. sapiens	KLK8	kallikrein related peptidase 8	GO:0048681 negative regulation of axon regeneration;GO:0031642 negative regulation of myelination;GO:0070571 negative regulation of neuron projection regeneration		Enzymes/{ENZYME proteins/Hydrolases,Peptidases/Serine-type peptidases}	Vesicles(Approved)			(M5946)HALLMARK COAGULATION; (M5956)HALLMARK KRAS SIGNALING DN; (M5939)HALLMARK P53 PATHWAY	0	1	0	0	0	0	0	0	0	0	0	0	0	0	0	0	0	0	0	0	2
1392	CRH	1	1	0	1392	Gene_ID	H. sapiens	1392	H. sapiens	CRH	corticotropin releasing hormone	GO:2000854 positive regulation of corticosterone secretion;GO:0051464 positive regulation of cortisol secretion;GO:0042322 negative regulation of circadian sleep/wake cycle, REM sleep				Corticotropin (Receptor binding);D-Phenylalanine (Receptor binding);Alpha-Aminoisobutyric Acid (Receptor binding)			1	0	1	0	0	0	0	0	1	0	0	0	0	0	0	0	1	0	0	0	2
60482	SLC5A7	1	0	1	60482	Gene_ID	H. sapiens	60482	H. sapiens	SLC5A7	solute carrier family 5 member 7	GO:0008292 acetylcholine biosynthetic process;GO:1900620 acetate ester biosynthetic process;GO:0015871 choline transport		Transporters/Electrochemical Potential-driven transporters	Cell Junctions;Intermediate filaments;Nuclear bodies(Approved)				0	0	0	0	0	0	1	0	1	0	0	0	0	0	0	0	1	0	0	0	2
3854	KRT6B	1	0	1	3854	Gene_ID	H. sapiens	3854	H. sapiens	KRT6B	keratin 6B	GO:0070268 cornification;GO:0031424 keratinization;GO:0007398 ectoderm development			Intermediate filaments(Approved)				0	1	0	0	0	0	0	0	0	0	0	0	0	0	0	0	0	0	0	0	2
3897	L1CAM	1	0	1	3897	Gene_ID	H. sapiens	3897	H. sapiens	L1CAM	L1 cell adhesion molecule	GO:0045773 positive regulation of axon extension;GO:0050772 positive regulation of axonogenesis;GO:0030516 regulation of axon extension		CD markers	Plasma membrane(Supported)Nucleoplasm(Approved)		(M53)PID INTEGRIN3 PATHWAY	(M5919)HALLMARK HEDGEHOG SIGNALING	1	0	0	0	0	0	0	0	0	0	0	0	0	0	0	0	0	0	0	0	2
94025	MUC16	1	0	1	94025	Gene_ID	H. sapiens	94025	H. sapiens	MUC16	mucin 16, cell surface associated	GO:0002223 stimulatory C-type lectin receptor signaling pathway;GO:0002220 innate immune response activating cell surface receptor signaling pathway;GO:0016266 O-glycan processing				Oregovomab	(M5880)NABA ECM AFFILIATED; (M5885)NABA MATRISOME ASSOCIATED; (M5889)NABA MATRISOME		1	0	0	0	0	0	0	0	0	0	0	0	0	0	0	0	0	0	0	0	2
6899	TBX1	1	1	0	6899	Gene_ID	H. sapiens	6899	H. sapiens	TBX1	T-box transcription factor 1	GO:2001037 positive regulation of tongue muscle cell differentiation;GO:2001035 regulation of tongue muscle cell differentiation;GO:1902811 positive regulation of skeletal muscle fiber differentiation		Transcription factors/Immunoglobulin fold	Cytoplasmic bodies;Nuclear bodies(Approved)				1	1	1	0	0	1	1	1	0	0	0	0	0	0	0	0	0	0	0	1	2
23532	PRAME	0	1	1	23532	Gene_ID	H. sapiens	23532	H. sapiens	PRAME	preferentially expressed antigen in melanoma	GO:0048387 negative regulation of retinoic acid receptor signaling pathway;GO:0048385 regulation of retinoic acid receptor signaling pathway;GO:0048384 retinoic acid receptor signaling pathway							0	0	0	0	0	0	0	0	0	0	0	0	0	0	0	0	0	0	0	0	2
6700	SPRR2A	1	0	1	6700	Gene_ID	H. sapiens	6700	H. sapiens	SPRR2A	small proline rich protein 2A	GO:0070268 cornification;GO:0031424 keratinization;GO:0030216 keratinocyte differentiation							0	1	0	0	0	0	0	0	0	0	0	0	0	0	0	0	0	0	0	0	2
25818	KLK5	1	0	1	25818	Gene_ID	H. sapiens	25818	H. sapiens	KLK5	kallikrein related peptidase 5	GO:0002803 positive regulation of antibacterial peptide production;GO:0002786 regulation of antibacterial peptide production;GO:0002225 positive regulation of antimicrobial peptide production		Enzymes/Peptidases/Serine-type peptidases					1	1	1	1	0	0	0	0	0	0	0	0	0	1	0	0	0	0	0	0	2
142827	C10orf129	1	0	1	142827	Gene_ID	H. sapiens	142827	H. sapiens	ACSM6	acyl-CoA synthetase medium chain family member 6	GO:0006637 acyl-CoA metabolic process;GO:0006633 fatty acid biosynthetic process;GO:0033875 ribonucleoside bisphosphate metabolic process		Enzymes/ENZYME proteins/Ligase					0	0	0	0	0	0	0	0	0	0	0	0	0	0	0	1	0	0	0	0	2
10643	IGF2BP3	1	0	1	10643	Gene_ID	H. sapiens	10643	H. sapiens	IGF2BP3	insulin like growth factor 2 mRNA binding protein 3	GO:0043488 regulation of mRNA stability;GO:0061013 regulation of mRNA catabolic process;GO:0042035 regulation of cytokine biosynthetic process			Cytosol(Enhanced)				0	0	0	0	0	0	0	0	0	0	0	0	0	0	0	0	0	0	1	0	2
27324	TOX3	1	0	1	27324	Gene_ID	H. sapiens	27324	H. sapiens	TOX3	TOX high mobility group box family member 3	GO:0043524 negative regulation of neuron apoptotic process;GO:0043523 regulation of neuron apoptotic process;GO:1901215 negative regulation of neuron death		Transcription factors/Other all-alpha-helical DNA-binding domains	Nucleoplasm(Approved)				0	0	0	0	0	0	0	0	0	0	0	0	0	0	0	0	0	0	0	0	2
57451	ODZ2	1	0	1	57451	Gene_ID	H. sapiens	57451	H. sapiens	TENM2	teneurin transmembrane protein 2	GO:0051491 positive regulation of filopodium assembly;GO:0051489 regulation of filopodium assembly;GO:0007157 heterophilic cell-cell adhesion via plasma membrane cell adhesion molecules			Nucleoli(Approved)			(M5956)HALLMARK KRAS SIGNALING DN	0	0	0	0	0	0	0	0	0	0	0	0	0	0	0	0	0	0	0	0	2
3853	KRT6A	1	0	1	3853	Gene_ID	H. sapiens	3853	H. sapiens	KRT6A	keratin 6A	GO:0001899 negative regulation of cytolysis by symbiont of host cells;GO:0001898 regulation of cytolysis by symbiont of host cells;GO:0051803 negative regulation of cytolysis in other organism involved in symbiotic interaction			Intermediate filaments(Approved)				0	1	1	0	0	0	0	0	0	0	0	0	0	0	0	0	0	0	0	0	2
10644	IGF2BP2	1	0	1	10644	Gene_ID	H. sapiens	10644	H. sapiens	IGF2BP2	insulin like growth factor 2 mRNA binding protein 2	GO:0043488 regulation of mRNA stability;GO:0061013 regulation of mRNA catabolic process;GO:0042035 regulation of cytokine biosynthetic process			Cytosol(Enhanced)				0	0	0	0	0	0	0	0	0	0	0	0	0	0	0	0	0	0	1	0	2
160428	ALDH1L2	1	0	1	160428	Gene_ID	H. sapiens	160428	H. sapiens	ALDH1L2	aldehyde dehydrogenase 1 family member L2	GO:0009258 10-formyltetrahydrofolate catabolic process;GO:0009397 folic acid-containing compound catabolic process;GO:0009256 10-formyltetrahydrofolate metabolic process		Enzymes/ENZYME proteins/Oxidoreductases	Mitochondria(Enhanced)				0	0	0	0	0	0	0	0	0	0	0	0	0	0	0	0	0	0	0	0	2
2214	FCGR3A	1	0	1	2214	Gene_ID	H. sapiens	2214	H. sapiens	FCGR3A	Fc fragment of IgG receptor IIIa	GO:0038096 Fc-gamma receptor signaling pathway involved in phagocytosis;GO:0002431 Fc receptor mediated stimulatory signaling pathway;GO:0038094 Fc-gamma receptor signaling pathway		CD markers		Cetuximab;Etanercept;Immune Globulin Human;Adalimumab;Abciximab;Gemtuzumab ozogamicin;Trastuzumab;Rituximab;Basiliximab;Muromonab;Ibritumomab tiuxetan;Tositumomab;Alemtuzumab;Alefacept;Efalizumab;Natalizumab;Palivizumab;Daclizumab;Bevacizumab	(M11736)SA MMP CYTOKINE CONNECTION		0	0	0	0	0	0	0	0	0	0	0	0	0	0	0	0	0	0	0	0	2
51702	PADI3	1	0	1	51702	Gene_ID	H. sapiens	51702	H. sapiens	PADI3	peptidyl arginine deiminase 3	GO:0036414 histone citrullination;GO:0018101 protein citrullination;GO:0018195 peptidyl-arginine modification		Enzymes/ENZYME proteins/Hydrolases	Nucleoplasm;Vesicles(Approved)	L-Citrulline (Protein-arginine deiminase activity)			0	0	0	0	0	0	0	0	0	0	0	0	0	0	0	0	0	0	0	0	2
341640	FREM2	1	1	0	341640	Gene_ID	H. sapiens	341640	H. sapiens	FREM2	FRAS1 related extracellular matrix 2	GO:0042733 embryonic digit morphogenesis;GO:0030326 embryonic limb morphogenesis;GO:0035113 embryonic appendage morphogenesis			Cytosol(Approved)		(M5880)NABA ECM AFFILIATED; (M5885)NABA MATRISOME ASSOCIATED; (M5889)NABA MATRISOME		1	0	0	0	0	1	0	0	0	1	0	0	0	0	0	0	0	0	0	0	2
56169	GSDMC	1	1	0	56169	Gene_ID	H. sapiens	56169	H. sapiens	GSDMC	gasdermin C	GO:0070269 pyroptosis;GO:0042742 defense response to bacterium;GO:0098542 defense response to other organism		Transporters/Transporter channels and pores	Mitochondria(Enhanced)				0	0	1	0	0	0	0	0	0	0	0	0	0	0	0	0	0	0	0	0	2
4920	ROR2	1	0	1	4920	Gene_ID	H. sapiens	4920	H. sapiens	ROR2	receptor tyrosine kinase like orphan receptor 2	GO:0045651 positive regulation of macrophage differentiation;GO:1900020 positive regulation of protein kinase C activity;GO:0030538 embryonic genitalia morphogenesis	Tyr protein kinase family	Enzymes/{ENZYME proteins/Transferases,Kinases/Tyr protein kinases}			(M77)PID WNT SIGNALING PATHWAY; (M23)PID WNT NONCANONICAL PATHWAY		1	0	0	0	0	1	1	1	0	1	0	1	1	0	0	0	0	0	0	0	2
135138	PACRG	1	0	1	135138	Gene_ID	H. sapiens	135138	H. sapiens	PACRG	parkin coregulated	GO:0007286 spermatid development;GO:0048515 spermatid differentiation;GO:0034620 cellular response to unfolded protein						(M5951)HALLMARK SPERMATOGENESIS	0	0	0	0	0	0	0	0	0	1	0	0	0	0	0	0	0	0	0	0	2
2786	GNG4	1	0	1	2786	Gene_ID	H. sapiens	2786	H. sapiens	GNG4	G protein subunit gamma 4	GO:0030308 negative regulation of cell growth;GO:0008277 regulation of G protein-coupled receptor signaling pathway;GO:0045926 negative regulation of growth		RAS pathway related proteins					1	0	0	0	0	0	0	0	0	0	0	0	0	0	0	0	0	0	0	0	2
645027	EVPLL	1	0	1	645027	Gene_ID	H. sapiens	645027	H. sapiens	EVPLL	envoplakin like	GO:0045104 intermediate filament cytoskeleton organization;GO:0045103 intermediate filament-based process;GO:0008544 epidermis development			Nuclear bodies;Nucleoplasm(Approved)				0	1	0	0	0	0	0	0	0	0	0	0	0	0	0	0	0	0	0	0	2
2619	GAS1	1	0	1	2619	Gene_ID	H. sapiens	2619	H. sapiens	GAS1	growth arrest specific 1	GO:0060628 regulation of ER to Golgi vesicle-mediated transport;GO:0010955 negative regulation of protein processing;GO:1903318 negative regulation of protein maturation			Nuclear speckles(Approved)		(M211)PID HEDGEHOG 2PATHWAY; (M176)PID FOXM1 PATHWAY	(M5916)HALLMARK APICAL SURFACE; (M5930)HALLMARK EPITHELIAL MESENCHYMAL TRANSITION	0	0	0	0	1	0	0	0	0	1	0	0	1	0	0	0	0	0	0	0	2
3226	HOXC10	0	1	1	3226	Gene_ID	H. sapiens	3226	H. sapiens	HOXC10	homeobox C10	GO:0021520 spinal cord motor neuron cell fate specification;GO:0120163 negative regulation of cold-induced thermogenesis;GO:0021522 spinal cord motor neuron differentiation		Transcription factors/Helix-turn-helix domains	Nuclear bodies;Nucleoplasm(Supported)			(M5901)HALLMARK G2M CHECKPOINT	0	0	0	0	0	1	1	1	0	1	0	0	1	0	0	0	0	0	0	0	2
1116	CHI3L1	1	0	1	1116	Gene_ID	H. sapiens	1116	H. sapiens	CHI3L1	chitinase 3 like 1	GO:0007250 activation of NF-kappaB-inducing kinase activity;GO:0010800 positive regulation of peptidyl-threonine phosphorylation;GO:0006032 chitin catabolic process							1	0	0	0	0	0	1	0	1	0	0	0	1	0	0	0	0	0	0	1	2
6288	SAA2;SAA1	1	0	1	6288	Gene_ID	H. sapiens	6288	H. sapiens	SAA1	serum amyloid A1	GO:0050716 positive regulation of interleukin-1 secretion;GO:0050704 regulation of interleukin-1 secretion;GO:0048246 macrophage chemotaxis				Human Serum Albumin (Heparin binding);Serum albumin iodonated (Heparin binding)	(M264)PID TOLL ENDOGENOUS PATHWAY		1	0	0	0	0	0	0	0	1	0	1	1	0	0	0	0	0	1	0	0	2
6566	SLC16A1	1	0	1	6566	Gene_ID	H. sapiens	6566	H. sapiens	SLC16A1	solute carrier family 16 member 1	GO:0015728 mevalonate transport;GO:0035879 plasma membrane lactate transport;GO:0035873 lactate transmembrane transport		Transporters/Electrochemical Potential-driven transporters	Cell Junctions;Plasma membrane(Enhanced)	Pyruvic acid (Symporter activity)		(M5906)HALLMARK ESTROGEN RESPONSE EARLY; (M5907)HALLMARK ESTROGEN RESPONSE LATE	1	0	0	0	0	0	0	0	1	0	0	0	0	0	0	0	0	0	0	0	2
113146	AHNAK2	1	0	1	113146	Gene_ID	H. sapiens	113146	H. sapiens	AHNAK2	AHNAK nucleoprotein 2	GO:0001778 plasma membrane repair;GO:0007009 plasma membrane organization;GO:0043484 regulation of RNA splicing			Cytosol;Plasma membrane(Enhanced)				0	0	0	0	0	0	0	0	0	0	0	0	0	0	0	0	0	0	0	0	2
5655	KLK10	1	0	1	5655	Gene_ID	H. sapiens	5655	H. sapiens	KLK10	kallikrein related peptidase 10	GO:0006508 proteolysis;GO:0007049 cell cycle;GO:0019538 protein metabolic process		Enzymes/Peptidases/Serine-type peptidases	Cytosol;Plasma membrane(Uncertain)			(M5906)HALLMARK ESTROGEN RESPONSE EARLY; (M5907)HALLMARK ESTROGEN RESPONSE LATE	0	0	0	0	0	0	0	0	0	0	0	0	0	0	0	0	0	0	0	0	2
2877	GPX2	1	0	1	2877	Gene_ID	H. sapiens	2877	H. sapiens	GPX2	glutathione peroxidase 2	GO:0098869 cellular oxidant detoxification;GO:1990748 cellular detoxification;GO:0098754 detoxification		Enzymes/ENZYME proteins/Oxidoreductases	Cytosol;Nucleoplasm(Approved)	Glutathione (Glutathione peroxidase activity)	(M236)PID DELTA NP63 PATHWAY; (M256)PID TAP63 PATHWAY	(M5939)HALLMARK P53 PATHWAY	0	0	0	0	0	0	0	0	0	0	0	0	0	0	0	1	0	0	0	0	2
8076	MFAP5	1	0	1	8076	Gene_ID	H. sapiens	8076	H. sapiens	MFAP5	microfibril associated protein 5	GO:0060216 definitive hemopoiesis;GO:0030198 extracellular matrix organization;GO:0043062 extracellular structure organization					(M17)PID NOTCH PATHWAY; (M3008)NABA ECM GLYCOPROTEINS; (M5884)NABA CORE MATRISOME	(M5930)HALLMARK EPITHELIAL MESENCHYMAL TRANSITION	0	0	0	1	0	0	0	0	0	0	0	0	0	0	0	0	0	0	0	0	2
286887	KRT6C	1	0	1	286887	Gene_ID	H. sapiens	286887	H. sapiens	KRT6C	keratin 6C	GO:0070268 cornification;GO:0031424 keratinization;GO:0045104 intermediate filament cytoskeleton organization			Intermediate filaments(Supported)				0	1	0	0	0	0	0	0	0	0	0	0	0	0	0	0	0	0	0	0	2
163782	KANK4	1	0	1	163782	Gene_ID	H. sapiens	163782	H. sapiens	KANK4	KN motif and ankyrin repeat domains 4	GO:0030837 negative regulation of actin filament polymerization;GO:0032272 negative regulation of protein polymerization;GO:0030833 regulation of actin filament polymerization			Cytosol;Microtubules(Uncertain)				0	0	0	0	0	0	0	0	0	0	0	0	0	0	0	0	0	0	0	0	2
389015	SLC9A4	1	0	1	389015	Gene_ID	H. sapiens	389015	H. sapiens	SLC9A4	solute carrier family 9 member A4	GO:0098719 sodium ion import across plasma membrane;GO:0051453 regulation of intracellular pH;GO:0001696 gastric acid secretion		Transporters/Electrochemical Potential-driven transporters	Nucleoplasm;Plasma membrane(Approved)				1	1	0	0	0	0	0	0	0	0	0	0	0	0	0	0	0	0	0	0	2
53828	FXYD4	1	0	1	53828	Gene_ID	H. sapiens	53828	H. sapiens	FXYD4	FXYD domain containing ion transport regulator 4	GO:1903779 regulation of cardiac conduction;GO:2000649 regulation of sodium ion transmembrane transporter activity;GO:1902305 regulation of sodium ion transmembrane transport							0	0	0	0	0	0	0	0	0	0	0	0	0	0	0	0	0	0	0	0	2
2297	FOXD1	1	0	1	2297	Gene_ID	H. sapiens	2297	H. sapiens	FOXD1	forkhead box D1	GO:0060678 dichotomous subdivision of terminal units involved in ureteric bud branching;GO:0072267 metanephric capsule specification;GO:0072130 renal capsule specification		Transcription factors/Helix-turn-helix domains					1	0	0	0	0	0	1	1	1	0	0	0	1	0	1	0	0	0	0	0	2
11283	CYP4F8	1	0	1	11283	Gene_ID	H. sapiens	11283	H. sapiens	CYP4F8	cytochrome P450 family 4 subfamily F member 8	GO:0006693 prostaglandin metabolic process;GO:0006692 prostanoid metabolic process;GO:0033559 unsaturated fatty acid metabolic process		Enzymes/ENZYME proteins/Oxidoreductases					0	0	0	0	0	0	0	0	0	0	0	0	0	0	0	1	0	0	0	0	2
54757	FAM20A	1	0	1	54757	Gene_ID	H. sapiens	54757	H. sapiens	FAM20A	FAM20A golgi associated secretory pathway pseudokinase	GO:0070166 enamel mineralization;GO:0044691 tooth eruption;GO:0097186 amelogenesis					(M3468)NABA ECM REGULATORS; (M5885)NABA MATRISOME ASSOCIATED; (M5889)NABA MATRISOME		1	0	1	0	1	0	0	0	0	0	0	0	0	0	0	0	0	0	0	0	2
844	CASQ1	1	0	1	844	Gene_ID	H. sapiens	844	H. sapiens	CASQ1	calsequestrin 1	GO:0014809 regulation of skeletal muscle contraction by regulation of release of sequestered calcium ion;GO:0010880 regulation of release of sequestered calcium ion into cytosol by sarcoplasmic reticulum;GO:0014808 release of sequestered calcium ion into cytosol by sarcoplasmic reticulum		Transporters/Accessory Factors Involved in Transport	Mitochondria;Nucleoplasm(Uncertain)			(M5909)HALLMARK MYOGENESIS	1	0	0	0	0	0	0	0	0	0	0	0	0	0	0	0	0	0	0	0	2
1824	DSC2	1	0	1	1824	Gene_ID	H. sapiens	1824	H. sapiens	DSC2	desmocollin 2	GO:0086073 bundle of His cell-Purkinje myocyte adhesion involved in cell communication;GO:0098911 regulation of ventricular cardiac muscle cell action potential;GO:0086069 bundle of His cell to Purkinje myocyte communication						(M5937)HALLMARK GLYCOLYSIS	0	1	0	0	0	0	0	0	0	0	0	0	0	0	0	0	0	0	0	0	2
6374	CXCL5	1	0	1	6374	Gene_ID	H. sapiens	6374	H. sapiens	CXCL5	C-X-C motif chemokine ligand 5	GO:0030593 neutrophil chemotaxis;GO:0071621 granulocyte chemotaxis;GO:1990266 neutrophil migration					(M5883)NABA SECRETED FACTORS; (M5885)NABA MATRISOME ASSOCIATED; (M5889)NABA MATRISOME		1	0	1	0	0	0	0	0	0	0	0	0	0	0	0	0	0	1	0	0	2
8710	SERPINB7	1	0	1	8710	Gene_ID	H. sapiens	8710	H. sapiens	SERPINB7	serpin family B member 7	GO:0072126 positive regulation of glomerular mesangial cell proliferation;GO:0072124 regulation of glomerular mesangial cell proliferation;GO:0072110 glomerular mesangial cell proliferation			Endoplasmic reticulum;Mitochondria(Approved)		(M3468)NABA ECM REGULATORS; (M5885)NABA MATRISOME ASSOCIATED; (M5889)NABA MATRISOME		1	0	0	0	1	0	1	0	0	0	0	0	0	0	1	0	0	0	0	1	2
3846	KRTAP5-9	1	0	1	3846	Gene_ID	H. sapiens	3846	H. sapiens	KRTAP5-9	keratin associated protein 5-9	GO:0031424 keratinization;GO:0030216 keratinocyte differentiation;GO:0009913 epidermal cell differentiation							0	1	0	0	0	0	0	0	0	0	0	0	0	0	0	0	0	0	0	0	2
4583	MUC2	1	0	1	4583	Gene_ID	H. sapiens	4583	H. sapiens	MUC2	mucin 2, oligomeric mucus/gel-forming	GO:0002223 stimulatory C-type lectin receptor signaling pathway;GO:0002220 innate immune response activating cell surface receptor signaling pathway;GO:0030277 maintenance of gastrointestinal epithelium					(M5880)NABA ECM AFFILIATED; (M5885)NABA MATRISOME ASSOCIATED; (M5889)NABA MATRISOME		1	0	0	0	0	0	0	0	0	0	0	0	0	0	0	0	0	0	0	0	2
1300	COL10A1	1	0	1	1300	Gene_ID	H. sapiens	1300	H. sapiens	COL10A1	collagen type X alpha 1 chain	GO:0030198 extracellular matrix organization;GO:0043062 extracellular structure organization;GO:0001501 skeletal system development			Endoplasmic reticulum(Approved)		(M3005)NABA COLLAGENS; (M198)PID SYNDECAN 1 PATHWAY; (M160)PID AVB3 INTEGRIN PATHWAY		0	0	0	1	0	0	1	0	0	0	0	0	0	0	0	0	0	0	0	0	2
3158	HMGCS2	1	0	1	3158	Gene_ID	H. sapiens	3158	H. sapiens	HMGCS2	3-hydroxy-3-methylglutaryl-CoA synthase 2	GO:0010142 farnesyl diphosphate biosynthetic process, mevalonate pathway;GO:1902767 isoprenoid biosynthetic process via mevalonate;GO:0045337 farnesyl diphosphate biosynthetic process		Enzymes/ENZYME proteins/Transferases	Mitochondria(Supported)		(M254)PID MYC REPRESS PATHWAY	(M5946)HALLMARK COAGULATION; (M5935)HALLMARK FATTY ACID METABOLISM; (M5907)HALLMARK ESTROGEN RESPONSE LATE	0	0	0	0	0	0	0	0	0	0	0	0	0	0	0	0	1	0	0	0	2
55959	SULF2	1	0	1	55959	Gene_ID	H. sapiens	55959	H. sapiens	SULF2	sulfatase 2	GO:0014846 esophagus smooth muscle contraction;GO:2000345 regulation of hepatocyte proliferation;GO:0032836 glomerular basement membrane development					(M3468)NABA ECM REGULATORS; (M5885)NABA MATRISOME ASSOCIATED; (M5889)NABA MATRISOME	(M5916)HALLMARK APICAL SURFACE	1	0	0	1	1	0	1	0	0	0	0	0	1	0	1	0	0	0	0	0	2
55118	CRTAC1	1	0	1	55118	Gene_ID	H. sapiens	55118	H. sapiens	CRTAC1	cartilage acidic protein 1	GO:1900121 negative regulation of receptor binding;GO:0021772 olfactory bulb development;GO:0007413 axonal fasciculation							0	0	0	0	0	0	0	0	0	0	0	0	0	0	0	0	0	0	0	0	2
3294	HSD17B2	1	0	1	3294	Gene_ID	H. sapiens	3294	H. sapiens	HSD17B2	hydroxysteroid 17-beta dehydrogenase 2	GO:0006703 estrogen biosynthetic process;GO:0008210 estrogen metabolic process;GO:0001890 placenta development		Enzymes/ENZYME proteins/Oxidoreductases	Endoplasmic reticulum(Approved)	NADH (Testosterone dehydrogenase (nad+) activity)		(M5934)HALLMARK XENOBIOTIC METABOLISM	0	0	0	0	0	0	1	0	1	1	0	0	0	0	0	0	1	0	0	0	2
6926	TBX3	1	0	1	6926	Gene_ID	H. sapiens	6926	H. sapiens	TBX3	T-box transcription factor 3	GO:0003167 atrioventricular bundle cell differentiation;GO:0060931 sinoatrial node cell development;GO:0060932 His-Purkinje system cell differentiation		Transcription factors/Immunoglobulin fold	Cytosol;Nucleoplasm(Approved)				0	1	0	0	0	1	1	1	1	1	0	0	1	0	0	0	0	0	0	1	2
5650	KLK7	1	0	1	5650	Gene_ID	H. sapiens	5650	H. sapiens	KLK7	kallikrein related peptidase 7	GO:0002803 positive regulation of antibacterial peptide production;GO:0002786 regulation of antibacterial peptide production;GO:0002225 positive regulation of antimicrobial peptide production		Enzymes/{ENZYME proteins/Hydrolases,Peptidases/Serine-type peptidases}	Plasma membrane(Supported)Nuclear membrane(Approved)	L-alanyl-N-[(1S,2R)-1-benzyl-2-hydroxypropyl]-L-alaninamide (Serine-type peptidase activity)		(M5956)HALLMARK KRAS SIGNALING DN	1	1	1	1	0	0	0	0	0	0	0	0	0	1	0	0	0	0	0	0	2
2202	EFEMP1	1	0	1	2202	Gene_ID	H. sapiens	2202	H. sapiens	EFEMP1	EGF containing fibulin extracellular matrix protein 1	GO:0048050 post-embryonic eye morphogenesis;GO:0032331 negative regulation of chondrocyte differentiation;GO:0061037 negative regulation of cartilage development			Mitochondria(Uncertain)		(M3008)NABA ECM GLYCOPROTEINS; (M5884)NABA CORE MATRISOME; (M5889)NABA MATRISOME	(M5942)HALLMARK UV RESPONSE DN	0	0	0	1	0	1	1	0	0	0	0	0	0	0	0	0	0	0	0	0	2
776	CACNA1D	1	0	1	776	Gene_ID	H. sapiens	776	H. sapiens	CACNA1D	calcium voltage-gated channel subunit alpha1 D	GO:0086046 membrane depolarization during SA node cell action potential;GO:0099703 induction of synaptic vesicle exocytosis by positive regulation of presynaptic cytosolic calcium ion concentration;GO:0086015 SA node cell action potential		Voltage-gated ion channels/Voltage-Gated Calcium Channels	Nuclear membrane(Approved)	Isradipine (Voltage-gated calcium channel activity involved sa node cell action potential);Amlodipine (Voltage-gated calcium channel activity involved sa node cell action potential);Nimodipine (Voltage-gated calcium channel activity involved sa node cell action potential);Nisoldipine (Voltage-gated calcium channel activity involved sa node cell action potential);Cinnarizine (Voltage-gated calcium…			1	0	0	0	0	1	0	0	1	0	0	0	0	0	0	0	0	0	0	0	2
10631	POSTN	1	0	1	10631	Gene_ID	H. sapiens	10631	H. sapiens	POSTN	periostin	GO:1904209 positive regulation of chemokine (C-C motif) ligand 2 secretion;GO:1904207 regulation of chemokine (C-C motif) ligand 2 secretion;GO:0071307 cellular response to vitamin K			Golgi apparatus(Supported)Nucleoplasm(Approved)		(M3008)NABA ECM GLYCOPROTEINS; (M5884)NABA CORE MATRISOME; (M5889)NABA MATRISOME	(M5944)HALLMARK ANGIOGENESIS; (M5930)HALLMARK EPITHELIAL MESENCHYMAL TRANSITION	1	0	0	1	0	0	0	0	1	0	0	1	0	0	0	0	0	0	0	0	2
5266	PI3	1	0	1	5266	Gene_ID	H. sapiens	5266	H. sapiens	PI3	peptidase inhibitor 3	GO:0070268 cornification;GO:0007620 copulation;GO:0031424 keratinization			Plasma membrane(Approved)		(M9378)ST INTERLEUKIN 4 PATHWAY; (M18342)ST G ALPHA I PATHWAY; (M12645)ST GA13 PATHWAY		1	1	1	0	1	0	0	0	0	0	1	0	0	0	0	0	0	0	0	0	2
480	ATP1A4	1	0	1	480	Gene_ID	H. sapiens	480	H. sapiens	ATP1A4	ATPase Na+/K+ transporting subunit alpha 4	GO:1903779 regulation of cardiac conduction;GO:0030007 cellular potassium ion homeostasis;GO:1990573 potassium ion import across plasma membrane		Enzymes/ENZYME proteins/Hydrolases					1	0	0	0	0	0	0	0	0	0	0	0	0	0	0	0	0	0	0	0	2
6424	SFRP4	1	0	1	6424	Gene_ID	H. sapiens	6424	H. sapiens	SFRP4	secreted frizzled related protein 4	GO:2000119 negative regulation of sodium-dependent phosphate transport;GO:1902174 positive regulation of keratinocyte apoptotic process;GO:2000118 regulation of sodium-dependent phosphate transport					(M5493)WNT SIGNALING; (M5883)NABA SECRETED FACTORS; (M5885)NABA MATRISOME ASSOCIATED	(M5930)HALLMARK EPITHELIAL MESENCHYMAL TRANSITION	1	1	0	0	0	0	1	0	0	0	0	1	0	0	0	0	0	0	0	0	2
8000	PSCA	1	0	1	8000	Gene_ID	H. sapiens	8000	H. sapiens	PSCA	prostate stem cell antigen	GO:0070373 negative regulation of ERK1 and ERK2 cascade;GO:0043409 negative regulation of MAPK cascade;GO:0099601 regulation of neurotransmitter receptor activity			Plasma membrane(Supported)				1	0	0	0	0	0	0	0	0	0	0	0	0	0	0	0	0	0	0	0	2
22802	CLCA4	1	0	1	22802	Gene_ID	H. sapiens	22802	H. sapiens	CLCA4	chloride channel accessory 4	GO:1902476 chloride transmembrane transport;GO:0006821 chloride transport;GO:0098661 inorganic anion transmembrane transport							0	0	0	0	0	0	0	0	0	0	0	0	0	0	0	0	0	0	0	0	2
126410	CYP4F22	1	0	1	126410	Gene_ID	H. sapiens	126410	H. sapiens	CYP4F22	cytochrome P450 family 4 subfamily F member 22	GO:0046513 ceramide biosynthetic process;GO:0006672 ceramide metabolic process;GO:0030148 sphingolipid biosynthetic process							0	0	0	0	0	0	0	0	0	0	0	0	0	0	0	1	1	0	0	0	2
57127	RHBG	1	0	1	57127	Gene_ID	H. sapiens	57127	H. sapiens	RHBG	Rh family B glycoprotein (gene/pseudogene)	GO:0070634 transepithelial ammonium transport;GO:0072488 ammonium transmembrane transport;GO:0070633 transepithelial transport		Transporters/Transporter channels and pores	Nucleoplasm(Approved)				0	0	0	0	0	0	0	0	0	0	0	0	0	0	0	0	0	0	0	0	2
51200	CPA4	1	0	1	51200	Gene_ID	H. sapiens	51200	H. sapiens	CPA4	carboxypeptidase A4	GO:0016573 histone acetylation;GO:0018393 internal peptidyl-lysine acetylation;GO:0006475 internal protein amino acid acetylation		Enzymes/Peptidases/Metallopeptidases	Centrosome;Cytosol;Nucleoplasm(Approved)				0	0	0	0	0	0	0	0	0	0	0	0	0	0	0	0	0	0	0	0	2
124975	GGT6	1	0	1	124975	Gene_ID	H. sapiens	124975	H. sapiens	GGT6	gamma-glutamyltransferase 6	GO:1901750 leukotriene D4 biosynthetic process;GO:1901748 leukotriene D4 metabolic process;GO:0019370 leukotriene biosynthetic process		Enzymes/ENZYME proteins/{Hydrolases,Transferases}					0	0	0	0	0	0	0	0	0	0	0	0	0	0	0	1	0	0	0	0	2
6318	SERPINB4	1	1	0	6318	Gene_ID	H. sapiens	6318	H. sapiens	SERPINB4	serpin family B member 4	GO:0042270 protection from natural killer cell mediated cytotoxicity;GO:0045953 negative regulation of natural killer cell mediated cytotoxicity;GO:0002716 negative regulation of natural killer cell mediated immunity					(M3468)NABA ECM REGULATORS; (M5885)NABA MATRISOME ASSOCIATED; (M5889)NABA MATRISOME		1	0	0	0	1	0	0	0	0	0	0	1	0	0	0	0	0	0	0	0	2
10178	ODZ3	1	0	1	10178	Gene_ID	H. sapiens	10178	H. sapiens	TENM1	teneurin transmembrane protein 1	GO:0051491 positive regulation of filopodium assembly;GO:0006359 regulation of transcription by RNA polymerase III;GO:0030838 positive regulation of actin filament polymerization							1	0	0	0	0	0	0	0	0	0	0	1	0	0	0	0	0	0	0	0	2
148811	PM20D1	1	0	1	148811	Gene_ID	H. sapiens	148811	H. sapiens	PM20D1	peptidase M20 domain containing 1	GO:2000275 regulation of oxidative phosphorylation uncoupler activity;GO:0010155 regulation of proton transport;GO:0043605 cellular amide catabolic process		Enzymes/Peptidases/Metallopeptidases					0	0	0	0	0	0	0	0	0	0	0	0	0	0	0	0	0	0	0	0	2
79168	LILRA6	1	0	1	79168	Gene_ID	H. sapiens	79168	H. sapiens	LILRA6	leukocyte immunoglobulin like receptor A6	GO:0002250 adaptive immune response;GO:0006955 immune response;GO:0002376 immune system process							0	0	0	0	0	0	0	0	0	0	0	0	0	0	0	0	0	0	0	0	2
165679	C3orf57	1	0	1	165679	Gene_ID	H. sapiens	165679	H. sapiens	SPTSSB	serine palmitoyltransferase small subunit B	GO:1904220 regulation of serine C-palmitoyltransferase activity;GO:0046513 ceramide biosynthetic process;GO:0006672 ceramide metabolic process			Nuclear speckles(Approved)				0	0	0	0	0	0	0	0	0	0	0	0	0	0	0	0	0	0	0	0	2
5396	PRRX1	1	0	1	5396	Gene_ID	H. sapiens	5396	H. sapiens	PRRX1	paired related homeobox 1	GO:0048664 neuron fate determination;GO:0070570 regulation of neuron projection regeneration;GO:0042474 middle ear morphogenesis		Transcription factors/Helix-turn-helix domains	Nucleoplasm(Supported)			(M5953)HALLMARK KRAS SIGNALING UP; (M5930)HALLMARK EPITHELIAL MESENCHYMAL TRANSITION	0	0	0	0	0	1	1	0	0	1	0	0	1	0	0	0	0	0	0	1	2
2191	FAP	1	0	1	2191	Gene_ID	H. sapiens	2191	H. sapiens	FAP	fibroblast activation protein alpha	GO:0051917 regulation of fibrinolysis;GO:0010716 negative regulation of extracellular matrix disassembly;GO:1902362 melanocyte apoptotic process		Enzymes/{ENZYME proteins/Hydrolases,Peptidases/Serine-type peptidases}				(M5930)HALLMARK EPITHELIAL MESENCHYMAL TRANSITION	0	0	0	1	0	0	0	0	0	0	0	1	0	1	0	0	0	0	0	1	2
9118	INA	1	0	1	9118	Gene_ID	H. sapiens	9118	H. sapiens	INA	internexin neuronal intermediate filament protein alpha	GO:0099185 postsynaptic intermediate filament cytoskeleton organization;GO:0021762 substantia nigra development;GO:0060052 neurofilament cytoskeleton organization			Intermediate filaments(Supported)Nuclear membrane;Nucleoplasm(Approved)				0	0	0	0	0	0	0	0	0	0	0	0	0	0	0	0	0	0	0	0	2
3169	FOXA1	1	0	1	3169	Gene_ID	H. sapiens	3169	H. sapiens	FOXA1	forkhead box A1	GO:0061144 alveolar secondary septum development;GO:0033148 positive regulation of intracellular estrogen receptor signaling pathway;GO:0060741 prostate gland stromal morphogenesis		Transcription factors/Helix-turn-helix domains	Nucleoli fibrillar center;Nucleoplasm(Supported)		(M285)PID HNF3A PATHWAY; (M106)PID HNF3B PATHWAY; (M145)PID P53 DOWNSTREAM PATHWAY		0	1	1	0	0	0	1	1	1	1	0	1	1	0	1	0	1	0	0	0	2
10551	AGR2	1	0	1	10551	Gene_ID	H. sapiens	10551	H. sapiens	AGR2	anterior gradient 2, protein disulphide isomerase family member	GO:1903899 positive regulation of PERK-mediated unfolded protein response;GO:1903896 positive regulation of IRE1-mediated unfolded protein response;GO:0060480 lung goblet cell differentiation			Cytosol(Approved)			(M5907)HALLMARK ESTROGEN RESPONSE LATE	0	1	0	0	0	0	0	0	0	0	0	1	1	0	0	0	0	0	0	0	2
387695	C10orf99	1	0	1	387695	Gene_ID	H. sapiens	387695	H. sapiens	C10orf99	chromosome 10 open reading frame 99	GO:2000404 regulation of T cell migration;GO:0048247 lymphocyte chemotaxis;GO:2000401 regulation of lymphocyte migration							1	0	1	0	0	0	0	0	0	0	1	0	0	0	0	0	0	0	0	0	2
164284	APCDD1L	1	0	1	164284	Gene_ID	H. sapiens	164284	H. sapiens	APCDD1L	APC down-regulated 1 like	GO:0030178 negative regulation of Wnt signaling pathway;GO:0030111 regulation of Wnt signaling pathway;GO:0016055 Wnt signaling pathway			Mitochondria(Uncertain)				0	0	0	0	0	0	0	0	0	0	0	0	0	0	0	0	0	0	0	0	2
54658	UGT1A1	1	0	1	54658	Gene_ID	H. sapiens	54658	H. sapiens	UGT1A1	UDP glucuronosyltransferase family 1 member A1	GO:0006789 bilirubin conjugation;GO:0052696 flavonoid glucuronidation;GO:0070980 biphenyl catabolic process		Enzymes/ENZYME proteins/Transferases					0	0	1	0	0	0	0	0	1	0	0	0	1	0	0	1	1	0	0	0	2
1803	DPP4	1	0	1	1803	Gene_ID	H. sapiens	1803	H. sapiens	DPP4	dipeptidyl peptidase 4	GO:0090024 negative regulation of neutrophil chemotaxis;GO:0071623 negative regulation of granulocyte chemotaxis;GO:1902623 negative regulation of neutrophil migration		CD markers;Enzymes/{ENZYME proteins/Hydrolases,Peptidases/Serine-type peptidases}		Atorvastatin (Virus receptor activity);Sitagliptin (Virus receptor activity);2-Amino-3-Methyl-1-Pyrrolidin-1-Yl-Butan-1-One (Virus receptor activity);5-(Aminomethyl)-6-(2,4-Dichlorophenyl)-2-(3,5-Dimethoxyphenyl)Pyrimidin-4-Amine (Virus receptor activity);(2s)-Pyrrolidin-2-Ylmethylamine (Virus receptor activity);4-Iodo-L-phenylalanine (Virus receptor activity);Diisopropylphosphono Group (Virus re…		(M5957)HALLMARK PANCREAS BETA CELLS; (M5946)HALLMARK COAGULATION; (M5921)HALLMARK COMPLEMENT	1	0	0	1	0	0	0	0	1	0	0	1	0	1	0	0	0	0	0	0	2
10595	ERN2	1	0	1	10595	Gene_ID	H. sapiens	10595	H. sapiens	ERN2	endoplasmic reticulum to nucleus signaling 2	GO:0030263 apoptotic chromosome condensation;GO:0007257 activation of JUN kinase activity;GO:0043507 positive regulation of JUN kinase activity	Other	Enzymes/{ENZYME proteins/Transferases,Kinases}					1	0	0	0	0	0	0	0	0	0	0	0	0	0	0	0	0	0	0	0	2
26585	GREM1	1	0	1	26585	Gene_ID	H. sapiens	26585	H. sapiens	GREM1	gremlin 1, DAN family BMP antagonist	GO:0090190 positive regulation of branching involved in ureteric bud morphogenesis;GO:0060676 ureteric bud formation;GO:0090189 regulation of branching involved in ureteric bud morphogenesis					(M181)PID BMP PATHWAY; (M5880)NABA ECM AFFILIATED; (M5885)NABA MATRISOME ASSOCIATED	(M5930)HALLMARK EPITHELIAL MESENCHYMAL TRANSITION	1	1	0	1	0	1	1	1	0	1	0	1	1	0	1	0	0	0	0	1	2
79413	ZBED2	1	0	1	79413	Gene_ID	H. sapiens	79413	H. sapiens	ZBED2	zinc finger BED-type containing 2	GO:0090263 positive regulation of canonical Wnt signaling pathway;GO:0030177 positive regulation of Wnt signaling pathway;GO:0060828 regulation of canonical Wnt signaling pathway		Transcription factors/Zinc-coordinating DNA-binding domains	Cytosol;Mitochondria;Nuclear bodies(Approved)				0	0	0	0	0	0	0	0	0	0	0	0	0	0	0	0	0	0	0	0	2
10642	IGF2BP1	0	1	1	10642	Gene_ID	H. sapiens	10642	H. sapiens	IGF2BP1	insulin like growth factor 2 mRNA binding protein 1	GO:0022013 pallium cell proliferation in forebrain;GO:0070934 CRD-mediated mRNA stabilization;GO:0010610 regulation of mRNA stability involved in response to stress			Cytosol(Supported)		(M223)PID BETA CATENIN NUC PATHWAY		0	0	0	0	0	0	0	0	0	0	0	0	0	0	0	0	0	0	1	0	2
23105	FSTL4	1	0	1	23105	Gene_ID	H. sapiens	23105	H. sapiens	FSTL4	follistatin like 4	GO:0048671 negative regulation of collateral sprouting;GO:0031549 negative regulation of brain-derived neurotrophic factor receptor signaling pathway;GO:0061000 negative regulation of dendritic spine development			Mitochondria(Approved)				0	0	0	0	0	0	0	0	0	0	0	0	0	0	0	0	0	0	0	0	2
118663	BTBD16	1	0	1	118663	Gene_ID	H. sapiens	118663	H. sapiens	BTBD16	BTB domain containing 16				Cytosol;Nucleoli(Uncertain)				0	0	0	0	0	0	0	0	0	0	0	0	0	0	0	0	0	0	0	0	2
9332	CD163	1	0	1	9332	Gene_ID	H. sapiens	9332	H. sapiens	CD163	CD163 molecule	GO:0006953 acute-phase response;GO:0002526 acute inflammatory response;GO:0006898 receptor-mediated endocytosis		CD markers	Plasma membrane(Approved)	WF10 (Scavenger receptor activity)			0	0	0	0	0	0	0	0	0	0	0	0	0	0	0	0	0	0	0	0	2
400451	FAM174B	1	0	1	400451	Gene_ID	H. sapiens	400451	H. sapiens	FAM174B	family with sequence similarity 174 member B	GO:0007030 Golgi organization;GO:0010256 endomembrane system organization;GO:0006996 organelle organization			Intermediate filaments(Approved)				0	0	0	0	0	0	0	0	0	0	0	0	0	0	0	0	0	0	0	0	2
169166	SNX31	1	0	1	169166	Gene_ID	H. sapiens	169166	H. sapiens	SNX31	sorting nexin 31	GO:1990126 retrograde transport, endosome to plasma membrane;GO:0098876 vesicle-mediated transport to the plasma membrane;GO:0016197 endosomal transport		Transporters	Cytosol;Golgi apparatus;Nucleoplasm(Approved)				0	0	0	0	0	0	0	0	0	0	0	0	0	0	0	0	0	0	0	0	2
6340	SCNN1G	1	0	1	6340	Gene_ID	H. sapiens	6340	H. sapiens	SCNN1G	sodium channel epithelial 1 subunit gamma	GO:0055078 sodium ion homeostasis;GO:0050891 multicellular organismal water homeostasis;GO:0050909 sensory perception of taste		Transporters/Transporter channels and pores	Plasma membrane(Supported)Nucleoplasm(Approved)	Triamterene (Ww domain binding);Amiloride (Ww domain binding)			1	0	0	0	0	0	0	0	0	0	0	0	0	0	0	0	0	0	0	0	2
6423	SFRP2	1	0	1	6423	Gene_ID	H. sapiens	6423	H. sapiens	SFRP2	secreted frizzled related protein 2	GO:2000041 negative regulation of planar cell polarity pathway involved in axis elongation;GO:0042662 negative regulation of mesodermal cell fate specification;GO:0090179 planar cell polarity pathway involved in neural tube closure			Intermediate filaments(Approved)		(M5883)NABA SECRETED FACTORS; (M5885)NABA MATRISOME ASSOCIATED; (M5889)NABA MATRISOME		1	0	0	1	1	1	1	1	0	1	0	1	1	0	0	0	0	0	0	1	2
144347	FAM101A	1	0	1	144347	Gene_ID	H. sapiens	144347	H. sapiens	RFLNA	refilin A	GO:1900158 negative regulation of bone mineralization involved in bone maturation;GO:1900157 regulation of bone mineralization involved in bone maturation;GO:0061182 negative regulation of chondrocyte development			Golgi apparatus;Nucleoplasm(Approved)				0	0	0	0	0	0	1	0	0	0	0	0	0	0	0	0	0	0	0	0	2
7380	UPK3A	1	0	1	7380	Gene_ID	H. sapiens	7380	H. sapiens	UPK3A	uroplakin 3A	GO:0060157 urinary bladder development;GO:0015840 urea transport;GO:0055075 potassium ion homeostasis		Transporters/Accessory Factors Involved in Transport	Nuclear bodies;Nuclear membrane(Uncertain)				1	1	0	0	0	0	0	0	0	0	0	0	0	0	1	0	0	0	0	0	2
1510	CTSE	1	0	1	1510	Gene_ID	H. sapiens	1510	H. sapiens	CTSE	cathepsin E	GO:0019886 antigen processing and presentation of exogenous peptide antigen via MHC class II;GO:0016540 protein autoprocessing;GO:0002495 antigen processing and presentation of peptide antigen via MHC class II		Enzymes/{ENZYME proteins/Hydrolases,Peptidases/Aspartic-type peptidases}			(M3468)NABA ECM REGULATORS; (M5885)NABA MATRISOME ASSOCIATED; (M5889)NABA MATRISOME	(M5946)HALLMARK COAGULATION; (M5945)HALLMARK HEME METABOLISM	1	0	0	0	1	0	0	0	0	0	0	0	0	0	0	0	0	0	0	0	2
651	BMP3	1	0	1	651	Gene_ID	H. sapiens	651	H. sapiens	BMP3	bone morphogenetic protein 3	GO:0010862 positive regulation of pathway-restricted SMAD protein phosphorylation;GO:0060393 regulation of pathway-restricted SMAD protein phosphorylation;GO:0060389 pathway-restricted SMAD protein phosphorylation					(M5883)NABA SECRETED FACTORS; (M5885)NABA MATRISOME ASSOCIATED; (M5889)NABA MATRISOME		1	0	0	0	0	0	1	0	0	0	0	0	0	0	0	0	0	0	0	0	2
5055	SERPINB2	1	0	1	5055	Gene_ID	H. sapiens	5055	H. sapiens	SERPINB2	serpin family B member 2	GO:0042730 fibrinolysis;GO:0035722 interleukin-12-mediated signaling pathway;GO:0030195 negative regulation of blood coagulation				Urokinase (Serine-type endopeptidase inhibitor activity);Tenecteplase (Serine-type endopeptidase inhibitor activity)	(M3468)NABA ECM REGULATORS; (M5885)NABA MATRISOME ASSOCIATED; (M5889)NABA MATRISOME	(M5946)HALLMARK COAGULATION; (M5956)HALLMARK KRAS SIGNALING DN; (M5921)HALLMARK COMPLEMENT	1	0	0	0	1	0	0	0	0	0	0	0	0	0	0	0	0	1	0	0	2
79574	EPS8L3	1	0	1	79574	Gene_ID	H. sapiens	79574	H. sapiens	EPS8L3	EPS8 like 3	GO:1900029 positive regulation of ruffle assembly;GO:1900027 regulation of ruffle assembly;GO:0042634 regulation of hair cycle			Vesicles(Approved)				0	0	0	0	0	0	0	0	0	0	0	0	0	0	0	0	0	0	0	0	2
10158	PDZK1IP1	1	1	0	10158	Gene_ID	H. sapiens	10158	H. sapiens	PDZK1IP1	PDZK1 interacting protein 1				Cytosol;Nuclear speckles(Approved)			(M5945)HALLMARK HEME METABOLISM	0	0	0	0	0	0	0	0	0	0	0	0	0	0	0	0	0	0	0	0	2
10974	C10orf116	1	0	1	10974	Gene_ID	H. sapiens	10974	H. sapiens	ADIRF	adipogenesis regulatory factor	GO:0072719 cellular response to cisplatin;GO:0072718 response to cisplatin;GO:0045600 positive regulation of fat cell differentiation			Nucleoplasm(Supported)Cytosol(Approved)				0	0	0	0	0	0	0	0	0	0	0	0	0	0	0	0	0	0	0	0	2
9671	WSCD2	1	0	1	9671	Gene_ID	H. sapiens	9671	H. sapiens	WSCD2	WSC domain containing 2				Nucleoplasm(Approved)				0	0	0	0	0	0	0	0	0	0	0	0	0	0	0	0	0	0	0	0	2
131578	LRRC15	1	0	1	131578	Gene_ID	H. sapiens	131578	H. sapiens	LRRC15	leucine rich repeat containing 15	GO:0046813 receptor-mediated virion attachment to host cell;GO:0019062 virion attachment to host cell;GO:0044650 adhesion of symbiont to host cell			Plasma membrane;Vesicles(Approved)			(M5930)HALLMARK EPITHELIAL MESENCHYMAL TRANSITION	1	0	0	0	0	0	0	0	0	0	0	0	0	0	0	0	0	0	0	0	2
7379	UPK2	1	0	1	7379	Gene_ID	H. sapiens	7379	H. sapiens	UPK2	uroplakin 2	GO:0030855 epithelial cell differentiation;GO:0060429 epithelium development;GO:0009888 tissue development		Transporters/Accessory Factors Involved in Transport					0	1	0	0	0	0	0	0	0	0	0	0	0	0	0	0	0	0	0	0	2
8911	CACNA1I	1	1	0	8911	Gene_ID	H. sapiens	8911	H. sapiens	CACNA1I	calcium voltage-gated channel subunit alpha1 I	GO:0045956 positive regulation of calcium ion-dependent exocytosis;GO:1903307 positive regulation of regulated secretory pathway;GO:0086010 membrane depolarization during action potential		Voltage-gated ion channels/Voltage-Gated Calcium Channels		Cinnarizine (Voltage-gated calcium channel activity);Paramethadione (Voltage-gated calcium channel activity);Verapamil (Voltage-gated calcium channel activity);Zonisamide (Voltage-gated calcium channel activity);Mibefradil (Voltage-gated calcium channel activity);Flunarizine (Voltage-gated calcium channel activity)			0	0	0	0	0	0	0	0	1	0	0	0	0	0	0	0	0	0	0	0	2
84189	SLITRK6	1	0	1	84189	Gene_ID	H. sapiens	84189	H. sapiens	SLITRK6	SLIT and NTRK like family member 6	GO:0060007 linear vestibuloocular reflex;GO:0002093 auditory receptor cell morphogenesis;GO:0060117 auditory receptor cell development			Plasma membrane(Supported)				0	1	0	0	0	1	0	0	0	0	0	0	0	0	0	0	0	0	0	0	2
1646	AKR1C2	1	0	1	1646	Gene_ID	H. sapiens	1646	H. sapiens	AKR1C2	aldo-keto reductase family 1 member C2	GO:0071799 cellular response to prostaglandin D stimulus;GO:0071798 response to prostaglandin D;GO:0044597 daunorubicin metabolic process		Enzymes/ENZYME proteins/Oxidoreductases	Cytosol;Endoplasmic reticulum;Nucleoli fibrillar center;Nucleus(Approved)	NADH (Trans-1,2-dihydrobenzene-1,2-diol dehydrogenase activity);Ursodeoxycholic acid (Trans-1,2-dihydrobenzene-1,2-diol dehydrogenase activity);2'-Monophosphoadenosine 5'-Diphosphoribose (Trans-1,2-dihydrobenzene-1,2-diol dehydrogenase activity);(10ALPHA,13ALPHA,14BETA,17ALPHA)-17-HYDROXYANDROST-4-EN-3-ONE (Trans-1,2-dihydrobenzene-1,2-diol dehydrogenase activity)		(M5934)HALLMARK XENOBIOTIC METABOLISM	0	1	1	0	0	0	0	0	1	0	0	0	0	0	0	0	1	0	0	0	2
79589	RNF128	1	0	1	79589	Gene_ID	H. sapiens	79589	H. sapiens	RNF128	ring finger protein 128	GO:1904352 positive regulation of protein catabolic process in the vacuole;GO:1904350 regulation of protein catabolic process in the vacuole;GO:0042036 negative regulation of cytokine biosynthetic process		Enzymes/ENZYME proteins/Transferases			(M60)PID NFAT TFPATHWAY		0	0	0	0	0	0	0	0	0	0	0	0	0	0	0	0	0	0	0	0	2
1580	CYP4B1	1	0	1	1580	Gene_ID	H. sapiens	1580	H. sapiens	CYP4B1	cytochrome P450 family 4 subfamily B member 1	GO:0018917 fluorene metabolic process;GO:0018879 biphenyl metabolic process;GO:0042738 exogenous drug catabolic process		Enzymes/ENZYME proteins/Oxidoreductases	Vesicles(Supported)			(M5905)HALLMARK ADIPOGENESIS	0	0	0	0	0	0	0	0	0	0	0	0	0	0	0	1	0	0	0	0	2
11045	UPK1A	1	0	1	11045	Gene_ID	H. sapiens	11045	H. sapiens	UPK1A	uroplakin 1A	GO:0030855 epithelial cell differentiation;GO:0060429 epithelium development;GO:0009888 tissue development		Transporters/Accessory Factors Involved in Transport					0	1	0	0	0	0	0	0	0	0	0	0	0	0	0	0	0	0	0	0	2
5803	PTPRZ1	1	0	1	5803	Gene_ID	H. sapiens	5803	H. sapiens	PTPRZ1	protein tyrosine phosphatase receptor type Z1	GO:0048714 positive regulation of oligodendrocyte differentiation;GO:0070445 regulation of oligodendrocyte progenitor proliferation;GO:0048713 regulation of oligodendrocyte differentiation		Enzymes/ENZYME proteins/Hydrolases	Cytosol(Supported)				0	0	0	0	0	0	0	0	0	0	0	0	0	0	0	0	0	1	0	0	2
80736	SLC44A4	1	0	1	80736	Gene_ID	H. sapiens	80736	H. sapiens	SLC44A4	solute carrier family 44 member 4	GO:0032475 otolith formation;GO:0035675 neuromast hair cell development;GO:0048886 neuromast hair cell differentiation		Transporters/Electrochemical Potential-driven transporters					0	1	0	0	0	1	0	0	1	0	0	0	0	0	0	0	1	0	0	0	2
2172	FABP6	1	0	1	2172	Gene_ID	H. sapiens	2172	H. sapiens	FABP6	fatty acid binding protein 6	GO:0019433 triglyceride catabolic process;GO:0046464 acylglycerol catabolic process;GO:0046461 neutral lipid catabolic process				Cholic Acid (Transporter activity);N-Cholylglycine (Transporter activity);Taurocholic Acid (Transporter activity)		(M5949)HALLMARK PEROXISOME	0	0	0	0	0	0	0	0	0	0	0	1	0	0	0	0	0	0	0	0	2
1577	CYP3A5	1	0	1	1577	Gene_ID	H. sapiens	1577	H. sapiens	CYP3A5	cytochrome P450 family 3 subfamily A member 5	GO:0009822 alkaloid catabolic process;GO:0042573 retinoic acid metabolic process;GO:0002933 lipid hydroxylation		Enzymes/ENZYME proteins/Oxidoreductases	Cytosol(Uncertain)	Paliperidone (Oxygen binding)			0	0	0	0	0	0	0	0	1	0	0	0	0	0	0	1	1	0	0	0	2
123099	DEGS2	1	0	1	123099	Gene_ID	H. sapiens	123099	H. sapiens	DEGS2	delta 4-desaturase, sphingolipid 2	GO:0006667 sphinganine metabolic process;GO:0046519 sphingoid metabolic process;GO:0034311 diol metabolic process		Enzymes/ENZYME proteins/Oxidoreductases	Nucleoli;Nucleus(Approved)				0	0	0	0	0	0	0	0	0	0	0	0	0	0	0	0	0	0	0	0	2
9945	GFPT2	1	0	1	9945	Gene_ID	H. sapiens	9945	H. sapiens	GFPT2	glutamine-fructose-6-phosphate transaminase 2	GO:0006048 UDP-N-acetylglucosamine biosynthetic process;GO:0006541 glutamine metabolic process;GO:0006047 UDP-N-acetylglucosamine metabolic process		Enzymes/ENZYME proteins/Transferases	Vesicles(Supported)			(M5953)HALLMARK KRAS SIGNALING UP; (M5890)HALLMARK TNFA SIGNALING VIA NFKB	0	0	0	0	0	0	0	0	0	0	0	0	0	0	0	0	0	0	0	0	2
55076	TMEM45A	1	1	0	55076	Gene_ID	H. sapiens	55076	H. sapiens	TMEM45A	transmembrane protein 45A				Endoplasmic reticulum;Vesicles(Approved)			(M5891)HALLMARK HYPOXIA	0	0	0	0	0	0	0	0	0	0	0	0	0	0	0	0	0	0	0	0	2
119385	AGAP11	1	0	1	119385	Gene_ID	H. sapiens	119385	H. sapiens	AGAP11	ArfGAP with GTPase domain, ankyrin repeat and PH domain 11	GO:0043547 positive regulation of GTPase activity;GO:0043087 regulation of GTPase activity;GO:0051345 positive regulation of hydrolase activity							0	0	0	0	0	0	0	0	0	0	0	0	0	0	0	0	0	0	0	0	2
255738	PCSK9	1	0	1	255738	Gene_ID	H. sapiens	255738	H. sapiens	PCSK9	proprotein convertase subtilisin/kexin type 9	GO:1905601 negative regulation of receptor-mediated endocytosis involved in cholesterol transport;GO:0032384 negative regulation of intracellular cholesterol transport;GO:1905600 regulation of receptor-mediated endocytosis involved in cholesterol transport		Enzymes/Peptidases/Serine-type peptidases		Alirocumab (Very-low-density lipoprotein particle receptor binding)		(M5916)HALLMARK APICAL SURFACE; (M5921)HALLMARK COMPLEMENT	0	0	0	0	0	0	0	0	0	0	0	0	1	0	1	0	1	0	0	0	2
11199	ANXA10	1	0	1	11199	Gene_ID	H. sapiens	11199	H. sapiens	ANXA10	annexin A10				Nucleoli;Nucleus;Vesicles(Approved)		(M5880)NABA ECM AFFILIATED; (M5885)NABA MATRISOME ASSOCIATED; (M5889)NABA MATRISOME	(M5953)HALLMARK KRAS SIGNALING UP	1	0	0	0	0	0	0	0	0	0	0	0	0	0	0	0	0	0	0	0	2
3861	KRT14	1	0	1	3861	Gene_ID	H. sapiens	3861	H. sapiens	KRT14	keratin 14	GO:0045110 intermediate filament bundle assembly;GO:0031581 hemidesmosome assembly;GO:0070268 cornification			Intermediate filaments(Enhanced)		(M236)PID DELTA NP63 PATHWAY; (M115)PID REG GR PATHWAY		0	1	0	0	0	0	0	0	0	0	1	0	0	0	0	0	0	0	0	0	2
79983	POF1B	1	0	1	79983	Gene_ID	H. sapiens	79983	H. sapiens	POF1B	POF1B actin binding protein	GO:0070830 bicellular tight junction assembly;GO:0003382 epithelial cell morphogenesis;GO:0120192 tight junction assembly			Golgi apparatus(Supported)Nucleoplasm(Approved)				0	1	0	0	0	0	0	0	0	0	0	0	0	0	0	0	0	0	0	0	2
388743	CAPN8	1	0	1	388743	Gene_ID	H. sapiens	388743	H. sapiens	CAPN8	calpain 8	GO:0007586 digestion;GO:0006508 proteolysis;GO:0019538 protein metabolic process		Enzymes/{ENZYME proteins/Hydrolases,Peptidases/Cysteine-type peptidases}	Nuclear membrane;Nucleoplasm;Vesicles(Approved)				0	0	0	1	0	0	0	0	0	0	0	0	0	0	0	0	0	0	0	0	2
100188947	LOC100188947	1	0	1	100188947	Gene_ID	H. sapiens	100188947	H. sapiens	HECTD2-AS1	HECTD2 antisense RNA 1								0	0	0	0	0	0	0	0	0	0	0	0	0	0	0	0	0	0	0	0	2
6866	TAC3	1	1	0	6866	Gene_ID	H. sapiens	6866	H. sapiens	TAC3	tachykinin precursor 3	GO:0007217 tachykinin receptor signaling pathway;GO:0045777 positive regulation of blood pressure;GO:0008217 regulation of blood pressure			Vesicles(Approved)				1	0	0	0	0	0	0	0	0	0	0	0	0	0	0	0	0	0	0	0	2
54857	GDPD2	1	0	1	54857	Gene_ID	H. sapiens	54857	H. sapiens	GDPD2	glycerophosphodiester phosphodiesterase domain containing 2	GO:0090527 actin filament reorganization;GO:0045669 positive regulation of osteoblast differentiation;GO:0045778 positive regulation of ossification		Enzymes/ENZYME proteins/Hydrolases					0	0	0	0	0	0	0	0	0	0	0	0	0	0	0	0	0	0	0	0	2
23581	CASP14	1	1	0	23581	Gene_ID	H. sapiens	23581	H. sapiens	CASP14	caspase 14	GO:0006919 activation of cysteine-type endopeptidase activity involved in apoptotic process;GO:0070268 cornification;GO:0043280 positive regulation of cysteine-type endopeptidase activity involved in apoptotic process		Enzymes/Peptidases/Cysteine-type peptidases	Cytosol;Mitochondria;Nucleus(Approved)				0	1	0	0	1	0	0	0	0	0	0	0	0	0	0	0	0	0	0	0	2
6362	CCL18	1	0	1	6362	Gene_ID	H. sapiens	6362	H. sapiens	CCL18	C-C motif chemokine ligand 18	GO:0048245 eosinophil chemotaxis;GO:0072677 eosinophil migration;GO:0030593 neutrophil chemotaxis					(M5883)NABA SECRETED FACTORS; (M5885)NABA MATRISOME ASSOCIATED; (M5889)NABA MATRISOME		1	0	0	0	0	0	0	0	0	0	0	0	0	0	0	0	0	1	0	0	2
92291	CAPN13	1	0	1	92291	Gene_ID	H. sapiens	92291	H. sapiens	CAPN13	calpain 13	GO:0006508 proteolysis;GO:0019538 protein metabolic process;GO:1901564 organonitrogen compound metabolic process		Enzymes/Peptidases/Cysteine-type peptidases	Nucleoplasm(Approved)				0	0	0	1	0	0	0	0	0	0	0	0	0	0	0	0	0	0	0	0	2
6317	SERPINB3	1	1	0	6317	Gene_ID	H. sapiens	6317	H. sapiens	SERPINB3	serpin family B member 3	GO:0043508 negative regulation of JUN kinase activity;GO:0046329 negative regulation of JNK cascade;GO:0046718 viral entry into host cell			Cytosol(Supported)Plasma membrane(Approved)	D-Serine (Virus receptor activity);Phosphonoserine (Virus receptor activity)	(M3468)NABA ECM REGULATORS; (M5885)NABA MATRISOME ASSOCIATED; (M5889)NABA MATRISOME		1	0	0	0	1	0	0	0	0	0	0	0	0	0	0	0	0	0	0	0	2
23584	VSIG2	1	0	1	23584	Gene_ID	H. sapiens	23584	H. sapiens	VSIG2	V-set and immunoglobulin domain containing 2				Nucleoplasm(Approved)				0	0	0	0	0	0	0	0	0	0	0	0	0	0	0	0	0	0	0	0	2
1830	DSG3	1	0	1	1830	Gene_ID	H. sapiens	1830	H. sapiens	DSG3	desmoglein 3	GO:0070268 cornification;GO:0031424 keratinization;GO:0030216 keratinocyte differentiation							0	1	0	0	0	0	0	0	0	0	0	0	0	0	0	0	0	0	0	0	2
8537	BCAS1	1	0	1	8537	Gene_ID	H. sapiens	8537	H. sapiens	BCAS1	brain enriched myelin associated protein 1	GO:0042552 myelination;GO:0008366 axon ensheathment;GO:0007272 ensheathment of neurons			Vesicles(Approved)				0	0	0	0	0	0	0	0	0	0	0	0	0	0	0	0	0	0	0	0	2
3371	TNC	1	0	1	3371	Gene_ID	H. sapiens	3371	H. sapiens	TNC	tenascin C	GO:0060739 mesenchymal-epithelial cell signaling involved in prostate gland development;GO:0060447 bud outgrowth involved in lung branching;GO:0071799 cellular response to prostaglandin D stimulus					(M118)PID INTEGRIN A9B1 PATHWAY; (M165)PID SYNDECAN 4 PATHWAY; (M53)PID INTEGRIN3 PATHWAY	(M5930)HALLMARK EPITHELIAL MESENCHYMAL TRANSITION; (M5890)HALLMARK TNFA SIGNALING VIA NFKB	0	0	1	1	0	0	0	0	0	1	0	1	1	0	1	0	0	0	0	0	2
284233	LOC284233	1	0	1	284233	Gene_ID	H. sapiens	284233	H. sapiens	CYP4F35P	cytochrome P450 family 4 subfamily F member 35, pseudogene								0	0	0	0	0	0	0	0	0	0	0	0	0	0	0	0	0	0	0	0	2
66002	CYP4F12	1	0	1	66002	Gene_ID	H. sapiens	66002	H. sapiens	CYP4F12	cytochrome P450 family 4 subfamily F member 12	GO:0003095 pressure natriuresis;GO:0036101 leukotriene B4 catabolic process;GO:0036100 leukotriene catabolic process							1	0	0	0	0	0	0	0	0	0	0	0	0	0	0	1	0	0	0	0	2
2335	FN1	1	0	1	2335	Gene_ID	H. sapiens	2335	H. sapiens	FN1	fibronectin 1	GO:2001202 negative regulation of transforming growth factor-beta secretion;GO:1904237 positive regulation of substrate-dependent cell migration, cell attachment to substrate;GO:2001201 regulation of transforming growth factor-beta secretion				Ocriplasmin (Protease binding)	(M212)PID INTEGRIN5 PATHWAY; (M118)PID INTEGRIN A9B1 PATHWAY; (M274)PID LYMPH ANGIOGENESIS PATHWAY	(M5946)HALLMARK COAGULATION; (M5921)HALLMARK COMPLEMENT; (M5930)HALLMARK EPITHELIAL MESENCHYMAL TRANSITION	1	0	0	1	1	1	0	0	1	0	0	1	0	0	0	0	0	1	0	1	2
8091	HMGA2	1	0	1	8091	Gene_ID	H. sapiens	8091	H. sapiens	HMGA2	high mobility group AT-hook 2	GO:2000685 positive regulation of cellular response to X-ray;GO:0045869 negative regulation of single stranded viral RNA replication via double stranded DNA intermediate;GO:0035978 histone H2A-S139 phosphorylation		Transcription factors	Nucleoli;Nucleus(Supported)				0	0	0	0	0	1	1	0	0	1	0	0	0	0	0	0	0	0	0	1	2
635	BHMT	1	0	1	635	Gene_ID	H. sapiens	635	H. sapiens	BHMT	betaine--homocysteine S-methyltransferase	GO:0050666 regulation of homocysteine metabolic process;GO:0071267 L-methionine salvage;GO:0042426 choline catabolic process		Enzymes/ENZYME proteins/Transferases	Cytosol(Supported)	L-Methionine (Zinc ion binding);S-(D-Carboxybutyl)-L-Homocysteine (Zinc ion binding);Citric Acid (Zinc ion binding)			0	0	0	0	0	0	0	0	0	0	0	0	0	0	0	0	0	0	0	0	2
11006	LILRB4	1	0	1	11006	Gene_ID	H. sapiens	11006	H. sapiens	LILRB4	leukocyte immunoglobulin like receptor B4	GO:0050860 negative regulation of T cell receptor signaling pathway;GO:0045591 positive regulation of regulatory T cell differentiation;GO:0050858 negative regulation of antigen receptor-mediated signaling pathway		CD markers					0	0	0	0	0	0	0	0	0	0	0	1	0	0	0	0	0	0	0	0	2
5653	KLK6	1	0	1	5653	Gene_ID	H. sapiens	5653	H. sapiens	KLK6	kallikrein related peptidase 6	GO:0016540 protein autoprocessing;GO:0045745 positive regulation of G protein-coupled receptor signaling pathway;GO:0030574 collagen catabolic process		Enzymes/Peptidases/Serine-type peptidases	Nucleoplasm(Supported)Cytokinetic bridge;Nuclear membrane(Approved)	Benzamidine (Serine-type endopeptidase activity)	(M275)PID ALPHA SYNUCLEIN PATHWAY		0	0	0	0	0	0	0	0	1	0	0	0	0	0	0	0	1	0	0	0	2
64600	PLA2G2F	1	0	1	64600	Gene_ID	H. sapiens	64600	H. sapiens	PLA2G2F	phospholipase A2 group IIF	GO:0050482 arachidonic acid secretion;GO:0036148 phosphatidylglycerol acyl-chain remodeling;GO:0036150 phosphatidylserine acyl-chain remodeling		Enzymes/ENZYME proteins/Hydrolases;RAS pathway related proteins					0	0	0	0	0	0	0	0	0	0	0	1	0	0	0	0	0	0	0	0	2
84624	FNDC1	1	0	1	84624	Gene_ID	H. sapiens	84624	H. sapiens	FNDC1	fibronectin type III domain containing 1				Nuclear speckles(Supported)		(M3008)NABA ECM GLYCOPROTEINS; (M5884)NABA CORE MATRISOME; (M5889)NABA MATRISOME		0	0	0	1	0	0	0	0	0	0	0	0	0	0	0	0	0	0	0	0	2
116123	FMO9P	1	0	1	116123	Gene_ID	H. sapiens	116123	H. sapiens	FMO9P	flavin containing dimethylaniline monoxygenase 9, pseudogene								0	0	0	0	0	0	0	0	0	0	0	0	0	0	0	0	0	0	0	0	2
6338	SCNN1B	1	0	1	6338	Gene_ID	H. sapiens	6338	H. sapiens	SCNN1B	sodium channel epithelial 1 subunit beta	GO:0055078 sodium ion homeostasis;GO:0050891 multicellular organismal water homeostasis;GO:0050909 sensory perception of taste		Transporters/Transporter channels and pores		Triamterene (Ww domain binding);Amiloride (Ww domain binding)			1	0	0	0	0	0	0	0	0	0	0	0	0	0	0	0	0	0	0	0	2
84141	FAM176A	1	0	1	84141	Gene_ID	H. sapiens	84141	H. sapiens	EVA1A	eva-1 homolog A, regulator of programmed cell death	GO:0043687 post-translational protein modification;GO:0006914 autophagy;GO:0061919 process utilizing autophagic mechanism			Vesicles(Supported)Plasma membrane(Approved)				0	0	0	0	0	0	0	0	0	0	0	0	0	0	0	0	0	0	0	0	2
654790	PCP4L1	1	0	1	654790	Gene_ID	H. sapiens	654790	H. sapiens	PCP4L1	Purkinje cell protein 4 like 1				Mitochondria;Nucleoplasm(Approved)				0	0	0	0	0	0	0	0	0	0	0	0	0	0	0	0	0	0	0	0	2
6563	SLC14A1	1	0	1	6563	Gene_ID	H. sapiens	6563	H. sapiens	SLC14A1	solute carrier family 14 member 1 (Kidd blood group)	GO:0071918 urea transmembrane transport;GO:0015840 urea transport;GO:0019755 one-carbon compound transport		Blood group antigen proteins;Transporters/Transporter channels and pores	Vesicles(Supported)				0	0	0	0	0	0	0	0	0	0	0	0	0	0	0	0	0	0	0	0	2
54097	FAM3B	1	0	1	54097	Gene_ID	H. sapiens	54097	H. sapiens	FAM3B	FAM3 metabolism regulating signaling molecule B	GO:0030073 insulin secretion;GO:0030072 peptide hormone secretion;GO:0042593 glucose homeostasis			Vesicles(Approved)				0	0	0	0	0	0	0	0	1	0	0	0	0	0	0	0	0	0	0	0	2
6469	SHH	1	0	1	6469	Gene_ID	H. sapiens	6469	H. sapiens	SHH	sonic hedgehog signaling molecule	GO:0021938 smoothened signaling pathway involved in regulation of cerebellar granule cell precursor cell proliferation;GO:2000062 negative regulation of ureter smooth muscle cell differentiation;GO:2000063 positive regulation of ureter smooth muscle cell differentiation					(M211)PID HEDGEHOG 2PATHWAY; (M285)PID HNF3A PATHWAY; (M219)PID HEDGEHOG GLI PATHWAY	(M5919)HALLMARK HEDGEHOG SIGNALING	1	1	0	0	1	1	1	1	1	1	0	1	1	0	1	0	1	0	0	1	2
50515	CHST11	1	0	1	50515	Gene_ID	H. sapiens	50515	H. sapiens	CHST11	carbohydrate sulfotransferase 11	GO:0030206 chondroitin sulfate biosynthetic process;GO:0048703 embryonic viscerocranium morphogenesis;GO:0030512 negative regulation of transforming growth factor beta receptor signaling pathway		Enzymes/ENZYME proteins/Transferases	Golgi apparatus(Approved)				0	0	0	0	0	1	1	0	0	1	0	0	0	0	0	0	0	0	0	0	2
10202	DHRS2	1	0	1	10202	Gene_ID	H. sapiens	10202	H. sapiens	DHRS2	dehydrogenase/reductase 2	GO:0043011 myeloid dendritic cell differentiation;GO:0097028 dendritic cell differentiation;GO:0008207 C21-steroid hormone metabolic process			Mitochondria;Nucleus(Enhanced)			(M5906)HALLMARK ESTROGEN RESPONSE EARLY; (M5907)HALLMARK ESTROGEN RESPONSE LATE	0	0	0	0	0	0	0	0	1	0	0	1	0	0	0	0	1	0	0	0	2
340075	ARSI	1	0	1	340075	Gene_ID	H. sapiens	340075	H. sapiens	ARSI	arylsulfatase family member I				Golgi apparatus(Approved)				0	0	0	0	0	0	0	0	0	0	0	0	0	0	0	0	0	0	0	0	2
10481	HOXB13	0	1	1	10481	Gene_ID	H. sapiens	10481	H. sapiens	HOXB13	homeobox B13	GO:0060527 prostate epithelial cord arborization involved in prostate glandular acinus morphogenesis;GO:0060526 prostate glandular acinus morphogenesis;GO:0060743 epithelial cell maturation involved in prostate gland development		Transcription factors/Helix-turn-helix domains	Nucleoplasm(Enhanced)		(M151)PID AR TF PATHWAY		0	1	0	0	0	0	0	0	0	1	0	0	1	0	1	0	0	0	0	1	2
4241	MFI2	1	0	1	4241	Gene_ID	H. sapiens	4241	H. sapiens	MELTF	melanotransferrin	GO:0010756 positive regulation of plasminogen activation;GO:0090091 positive regulation of extracellular matrix disassembly;GO:1900025 negative regulation of substrate adhesion-dependent cell spreading		CD markers					1	0	0	1	0	0	0	0	0	0	1	1	0	1	0	0	0	0	0	0	2
6822	SULT2A1	1	0	1	6822	Gene_ID	H. sapiens	6822	H. sapiens	SULT2A1	sulfotransferase family 2A member 1	GO:0030573 bile acid catabolic process;GO:0050427 3'-phosphoadenosine 5'-phosphosulfate metabolic process;GO:0006068 ethanol catabolic process		Enzymes/ENZYME proteins/Transferases	Cytosol(Supported)	Prasterone (Sulfotransferase activity);Adenosine-3'-5'-Diphosphate (Sulfotransferase activity);Aetiocholanolone (Sulfotransferase activity);Mercury Diiodide (Sulfotransferase activity)	(M40)PID E2F PATHWAY		0	0	0	0	0	0	0	0	0	0	0	0	0	0	0	1	1	0	0	0	2
55289	ACOXL	1	0	1	55289	Gene_ID	H. sapiens	55289	H. sapiens	ACOXL	acyl-CoA oxidase like	GO:0033540 fatty acid beta-oxidation using acyl-CoA oxidase;GO:0006635 fatty acid beta-oxidation;GO:0009062 fatty acid catabolic process			Cytosol(Supported)Nucleoli(Approved)				0	0	0	0	0	0	0	0	0	0	0	0	0	0	0	1	0	0	0	0	2
100144604	LOC100144604	1	0	1	100144604	Gene_ID	H. sapiens	100144604	H. sapiens	LINC00930	long intergenic non-protein coding RNA 930								0	0	0	0	0	0	0	0	0	0	0	0	0	0	0	0	0	0	0	0	2
127707	KLHDC7A	1	0	1	127707	Gene_ID	H. sapiens	127707	H. sapiens	KLHDC7A	kelch domain containing 7A				Nuclear speckles(Approved)				0	0	0	0	0	0	0	0	0	0	0	0	0	0	0	0	0	0	0	0	2
3624	INHBA	1	0	1	3624	Gene_ID	H. sapiens	3624	H. sapiens	INHBA	inhibin subunit beta A	GO:0046882 negative regulation of follicle-stimulating hormone secretion;GO:0046881 positive regulation of follicle-stimulating hormone secretion;GO:0021773 striatal medium spiny neuron differentiation					(M185)PID ALK1 PATHWAY; (M5883)NABA SECRETED FACTORS; (M5885)NABA MATRISOME ASSOCIATED	(M5932)HALLMARK INFLAMMATORY RESPONSE; (M5953)HALLMARK KRAS SIGNALING UP; (M5930)HALLMARK EPITHELIAL MESENCHYMAL TRANSITION	1	1	1	0	0	1	0	0	1	1	0	1	0	0	0	0	0	0	0	0	2
80307	FER1L4	1	0	1	80307	Gene_ID	H. sapiens	80307	H. sapiens	FER1L4	fer-1 like family member 4 (pseudogene)	GO:0007009 plasma membrane organization;GO:0010256 endomembrane system organization;GO:0061024 membrane organization							0	0	0	0	0	0	0	0	0	0	0	0	0	0	0	0	0	0	0	0	2
3860	KRT13	0	0	1	3860	Gene_ID	H. sapiens	3860	H. sapiens	KRT13	keratin 13	GO:0070268 cornification;GO:0031424 keratinization;GO:0030216 keratinocyte differentiation			Intermediate filaments(Enhanced)			(M5956)HALLMARK KRAS SIGNALING DN; (M5906)HALLMARK ESTROGEN RESPONSE EARLY; (M5907)HALLMARK ESTROGEN RESPONSE LATE	0	1	0	0	0	0	0	0	0	0	0	0	0	0	0	0	0	0	0	0	1
5265	SERPINA1	1	0	0	5265	Gene_ID	H. sapiens	5265	H. sapiens	SERPINA1	serpin family A member 1	GO:0048208 COPII vesicle coating;GO:0048207 vesicle targeting, rough ER to cis-Golgi;GO:0048199 vesicle targeting, to, from or within Golgi			Vesicles(Enhanced)	2-[3,4-Dihydroxy-2-Hydroxymethyl-5-(2-Hydroxy-Nonyl)-Tetrahydro-Furan-2-Yloxy]-6-Hydroxymethyl-Tetra Hydro-Pyran-3,4,5-Triol (Serine-type endopeptidase inhibitor activity);Beta-Mercaptoethanol (Serine-type endopeptidase inhibitor activity);Recombinant alpha 1-antitrypsin (Serine-type endopeptidase inhibitor activity)	(M285)PID HNF3A PATHWAY; (M19)PID P73PATHWAY; (M3468)NABA ECM REGULATORS	(M5946)HALLMARK COAGULATION; (M5921)HALLMARK COMPLEMENT; (M5907)HALLMARK ESTROGEN RESPONSE LATE	1	0	0	0	1	0	0	0	0	0	0	0	0	0	0	0	0	0	0	0	1
8755	ADAM6	1	0	0	8755	Gene_ID	H. sapiens	8755	H. sapiens	ADAM6	ADAM metallopeptidase domain 6 (pseudogene)								0	0	0	0	0	0	0	0	0	0	0	0	0	0	0	0	0	0	0	0	1
56961	SHD	0	1	0	56961	Gene_ID	H. sapiens	56961	H. sapiens	SHD	Src homology 2 domain containing transforming protein D				Cytosol;Microtubule organizing center(Uncertain)				0	0	0	0	0	0	0	0	0	0	0	0	0	0	0	0	0	0	0	0	1
3627	CXCL10	1	0	0	3627	Gene_ID	H. sapiens	3627	H. sapiens	CXCL10	C-X-C motif chemokine ligand 10	GO:0051281 positive regulation of release of sequestered calcium ion into cytosol;GO:1901740 negative regulation of myoblast fusion;GO:0051279 regulation of release of sequestered calcium ion into cytosol				N-Methylleucine (Receptor binding)	(M222)PID CXCR3 PATHWAY; (M5883)NABA SECRETED FACTORS; (M5885)NABA MATRISOME ASSOCIATED	(M5897)HALLMARK IL6 JAK STAT3 SIGNALING; (M5911)HALLMARK INTERFERON ALPHA RESPONSE; (M5947)HALLMARK IL2 STAT5 SIGNALING	1	0	1	0	0	0	0	0	0	0	0	0	0	0	0	0	0	1	0	1	1
94031	HTRA3	1	0	0	94031	Gene_ID	H. sapiens	94031	H. sapiens	HTRA3	HtrA serine peptidase 3	GO:0030512 negative regulation of transforming growth factor beta receptor signaling pathway;GO:0030514 negative regulation of BMP signaling pathway;GO:1903845 negative regulation of cellular response to transforming growth factor beta stimulus		Enzymes/Peptidases/Serine-type peptidases	Vesicles(Approved)		(M3468)NABA ECM REGULATORS; (M5885)NABA MATRISOME ASSOCIATED; (M5889)NABA MATRISOME		1	0	0	0	1	0	0	0	0	0	0	0	0	0	0	0	0	0	0	0	1
2326	FMO1	1	0	0	2326	Gene_ID	H. sapiens	2326	H. sapiens	FMO1	flavin containing dimethylaniline monoxygenase 1	GO:0070995 NADPH oxidation;GO:0006739 NADP metabolic process;GO:0009404 toxin metabolic process		Enzymes/ENZYME proteins/Oxidoreductases				(M5941)HALLMARK UV RESPONSE UP; (M5935)HALLMARK FATTY ACID METABOLISM; (M5934)HALLMARK XENOBIOTIC METABOLISM	0	0	1	0	0	0	0	0	0	0	0	0	0	0	0	1	1	0	0	0	1
3237	HOXD11	1	0	0	3237	Gene_ID	H. sapiens	3237	H. sapiens	HOXD11	homeobox D11	GO:0001658 branching involved in ureteric bud morphogenesis;GO:0060675 ureteric bud morphogenesis;GO:0072171 mesonephric tubule morphogenesis		Transcription factors/Helix-turn-helix domains	Nucleoplasm(Approved)			(M5953)HALLMARK KRAS SIGNALING UP	0	0	0	0	0	0	0	1	0	0	0	0	0	0	1	0	0	0	0	0	1
143379	C10orf82	0	1	0	143379	Gene_ID	H. sapiens	143379	H. sapiens	C10orf82	chromosome 10 open reading frame 82				Mitochondria(Approved)				0	0	0	0	0	0	0	0	0	0	0	0	0	0	0	0	0	0	0	0	1
8796	SCEL	1	0	0	8796	Gene_ID	H. sapiens	8796	H. sapiens	SCEL	sciellin	GO:0090263 positive regulation of canonical Wnt signaling pathway;GO:0030177 positive regulation of Wnt signaling pathway;GO:0030216 keratinocyte differentiation			Cytosol;Nucleoplasm;Plasma membrane(Supported)				0	1	0	0	0	0	1	0	0	0	0	0	0	0	0	0	0	0	0	0	1
1674	DES	1	0	0	1674	Gene_ID	H. sapiens	1674	H. sapiens	DES	desmin	GO:0030049 muscle filament sliding;GO:0033275 actin-myosin filament sliding;GO:0045109 intermediate filament organization			Intermediate filaments(Supported)		(M14)PID AURORA B PATHWAY	(M5909)HALLMARK MYOGENESIS	0	0	0	0	0	0	0	0	0	0	0	0	0	0	0	0	0	0	0	0	1
389434	IYD	1	0	0	389434	Gene_ID	H. sapiens	389434	H. sapiens	IYD	iodotyrosine deiodinase	GO:0006590 thyroid hormone generation;GO:0006570 tyrosine metabolic process;GO:0042403 thyroid hormone metabolic process		Enzymes/ENZYME proteins/Oxidoreductases	Plasma membrane(Supported)	3,5-Diiodotyrosine (Oxidoreductase activity)			0	0	0	0	0	0	0	0	1	0	0	0	0	0	0	0	0	0	0	0	1
440905	LOC440905	0	1	0	440905	Gene_ID	H. sapiens	440905	H. sapiens	FAR2P1	fatty acyl-CoA reductase 2 pseudogene 1								0	0	0	0	0	0	0	0	0	0	0	0	0	0	0	0	0	0	0	0	1
54055	C21orf15	0	0	1	54055	Gene_ID	H. sapiens	54055	H. sapiens	CYP4F29P	cytochrome P450 family 4 subfamily F member 29, pseudogene								0	0	0	0	0	0	0	0	0	0	0	0	0	0	0	0	0	0	0	0	1
6286	S100P	0	0	1	6286	Gene_ID	H. sapiens	6286	H. sapiens	S100P	S100 calcium binding protein P	GO:0043312 neutrophil degranulation;GO:0002283 neutrophil activation involved in immune response;GO:0042119 neutrophil activation			Nuclear bodies(Supported)	Cromoglicic acid (Magnesium ion binding)	(M5883)NABA SECRETED FACTORS; (M5885)NABA MATRISOME ASSOCIATED; (M5889)NABA MATRISOME		0	0	0	0	0	0	0	0	0	0	0	0	0	0	0	0	0	0	0	0	1
115701	ALPK2	0	0	1	115701	Gene_ID	H. sapiens	115701	H. sapiens	ALPK2	alpha kinase 2	GO:0003308 negative regulation of Wnt signaling pathway involved in heart development;GO:0003307 regulation of Wnt signaling pathway involved in heart development;GO:1905223 epicardium morphogenesis	Atypical: Alpha-type protein kinase family	Enzymes/Kinases/Atypical kinases	Cytosol(Approved)				0	0	0	0	0	0	0	0	0	0	0	0	0	0	0	0	0	0	0	0	1
374877	C19orf45	1	0	0	374877	Gene_ID	H. sapiens	374877	H. sapiens	TEX45	testis expressed 45								0	0	0	0	0	0	0	0	0	0	0	0	0	0	0	0	0	0	0	0	1
26577	PCOLCE2	0	0	1	26577	Gene_ID	H. sapiens	26577	H. sapiens	PCOLCE2	procollagen C-endopeptidase enhancer 2	GO:0010952 positive regulation of peptidase activity;GO:1990830 cellular response to leukemia inhibitory factor;GO:1990823 response to leukemia inhibitory factor			Cytosol;Nucleoplasm(Approved)		(M3008)NABA ECM GLYCOPROTEINS; (M5884)NABA CORE MATRISOME; (M5889)NABA MATRISOME	(M5930)HALLMARK EPITHELIAL MESENCHYMAL TRANSITION	0	0	0	1	1	0	0	0	0	0	0	0	0	0	0	0	0	0	0	0	1
29953	TRHDE	1	0	0	29953	Gene_ID	H. sapiens	29953	H. sapiens	TRHDE	thyrotropin releasing hormone degrading enzyme	GO:0043171 peptide catabolic process;GO:1901565 organonitrogen compound catabolic process;GO:0006518 peptide metabolic process		Enzymes/{ENZYME proteins/Hydrolases,Peptidases/Metallopeptidases}					0	0	0	0	0	0	0	0	0	0	0	0	0	0	0	0	0	0	0	0	1
113675	TDH	1	0	0	113675	Gene_ID	H. sapiens	113675	H. sapiens	SDSL	serine dehydratase like	GO:0019518 L-threonine catabolic process to glycine;GO:0006565 L-serine catabolic process;GO:0006567 threonine catabolic process		Enzymes/ENZYME proteins/Lyases	Cytosol(Approved)	Pyridoxal Phosphate (Pyridoxal phosphate binding)			0	0	0	0	0	0	0	0	0	0	0	0	0	0	0	0	0	0	0	0	1
343637	RSPO4	0	1	0	343637	Gene_ID	H. sapiens	343637	H. sapiens	RSPO4	R-spondin 4	GO:0035878 nail development;GO:0030177 positive regulation of Wnt signaling pathway;GO:0060173 limb development					(M3008)NABA ECM GLYCOPROTEINS; (M5884)NABA CORE MATRISOME; (M5889)NABA MATRISOME		0	0	0	1	0	0	0	0	0	1	0	0	0	0	0	0	0	0	0	0	1
79827	ASAM	1	0	0	79827	Gene_ID	H. sapiens	79827	H. sapiens	CLMP	CXADR like membrane protein	GO:0048565 digestive tract development;GO:0055123 digestive system development;GO:0035295 tube development							0	0	0	0	0	0	0	0	0	0	0	0	0	0	0	0	0	0	0	0	1
26762	HAVCR1	0	1	0	26762	Gene_ID	H. sapiens	26762	H. sapiens	HAVCR1	hepatitis A virus cellular receptor 1	GO:0046718 viral entry into host cell;GO:0030260 entry into host cell;GO:0051806 entry into cell of other organism involved in symbiotic interaction			Vesicles(Approved)				0	0	0	0	0	0	0	0	0	0	0	0	0	0	0	0	0	0	0	0	1
54474	KRT20	1	0	0	54474	Gene_ID	H. sapiens	54474	H. sapiens	KRT20	keratin 20	GO:0070268 cornification;GO:0045109 intermediate filament organization;GO:0031424 keratinization			Cytosol(Supported)				0	1	0	0	0	0	0	0	1	0	0	0	0	0	0	0	0	0	0	0	1
2018	EMX2	1	0	0	2018	Gene_ID	H. sapiens	2018	H. sapiens	EMX2	empty spiracles homeobox 2	GO:0021796 cerebral cortex regionalization;GO:0021542 dentate gyrus development;GO:0072197 ureter morphogenesis		Transcription factors/Helix-turn-helix domains	Nucleus(Approved)				0	0	0	0	0	0	0	1	0	0	0	0	0	0	1	0	0	0	0	0	1
56896	DPYSL5	0	1	0	56896	Gene_ID	H. sapiens	56896	H. sapiens	DPYSL5	dihydropyrimidinase like 5	GO:0006208 pyrimidine nucleobase catabolic process;GO:0046113 nucleobase catabolic process;GO:0006206 pyrimidine nucleobase metabolic process			Cytosol;Nucleoplasm(Approved)				0	0	0	0	0	0	0	0	0	0	0	0	0	0	0	0	0	0	0	0	1
6279	S100A8	1	0	0	6279	Gene_ID	H. sapiens	6279	H. sapiens	S100A8	S100 calcium binding protein A8	GO:0032119 sequestering of zinc ion;GO:0070488 neutrophil aggregation;GO:0006919 activation of cysteine-type endopeptidase activity involved in apoptotic process			Intermediate filaments(Supported)		(M264)PID TOLL ENDOGENOUS PATHWAY; (M5883)NABA SECRETED FACTORS; (M5885)NABA MATRISOME ASSOCIATED		1	0	1	0	1	0	0	0	1	0	1	1	0	0	0	0	0	1	0	0	1
6549	SLC9A2	1	0	0	6549	Gene_ID	H. sapiens	6549	H. sapiens	SLC9A2	solute carrier family 9 member A2	GO:0098719 sodium ion import across plasma membrane;GO:0051453 regulation of intracellular pH;GO:0030641 regulation of cellular pH		Transporters/Electrochemical Potential-driven transporters	Cell Junctions(Supported)				1	0	0	0	0	0	0	0	0	0	0	0	0	0	0	0	0	0	0	0	1
3223	HOXC6	0	1	0	3223	Gene_ID	H. sapiens	3223	H. sapiens	HOXC6	homeobox C6	GO:0048706 embryonic skeletal system development;GO:0009952 anterior/posterior pattern specification;GO:0003002 regionalization		Transcription factors/Helix-turn-helix domains	Nucleoplasm(Supported)Cytosol(Approved)				0	0	0	0	0	0	1	1	0	0	0	0	0	0	0	0	0	0	0	0	1
26525	IL1F5	0	0	1	26525	Gene_ID	H. sapiens	26525	H. sapiens	IL36RN	interleukin 36 receptor antagonist	GO:1902714 negative regulation of interferon-gamma secretion;GO:1902713 regulation of interferon-gamma secretion;GO:0019732 antifungal humoral response					(M5883)NABA SECRETED FACTORS; (M5885)NABA MATRISOME ASSOCIATED; (M5889)NABA MATRISOME		0	0	1	0	0	0	0	0	1	0	1	0	0	0	0	0	0	0	0	0	1
6278	S100A7	1	0	0	6278	Gene_ID	H. sapiens	6278	H. sapiens	S100A7	S100 calcium binding protein A7	GO:0010820 positive regulation of T cell chemotaxis;GO:0010819 regulation of T cell chemotaxis;GO:0140131 positive regulation of lymphocyte chemotaxis				1-Anilino-8-Naphthalene Sulfonate (Zinc ion binding)	(M254)PID MYC REPRESS PATHWAY; (M5883)NABA SECRETED FACTORS; (M5885)NABA MATRISOME ASSOCIATED		1	1	1	0	0	0	0	0	0	0	1	0	0	0	0	0	0	1	0	1	1
153579	BTNL9	0	1	0	153579	Gene_ID	H. sapiens	153579	H. sapiens	BTNL9	butyrophilin like 9	GO:0050852 T cell receptor signaling pathway;GO:0050851 antigen receptor-mediated signaling pathway;GO:0002429 immune response-activating cell surface receptor signaling pathway			Nuclear membrane;Vesicles(Approved)				0	0	0	0	0	0	0	0	0	0	0	0	0	0	0	0	0	0	0	0	1
7345	UCHL1	0	0	1	7345	Gene_ID	H. sapiens	7345	H. sapiens	UCHL1	ubiquitin C-terminal hydrolase L1	GO:0007412 axon target recognition;GO:0019896 axonal transport of mitochondrion;GO:0047497 mitochondrion transport along microtubule		Enzymes/{ENZYME proteins/Hydrolases,Peptidases/Cysteine-type peptidases}	Cytosol(Enhanced)Nucleoplasm(Approved)		(M275)PID ALPHA SYNUCLEIN PATHWAY		0	0	0	0	0	0	0	0	0	0	0	0	0	0	0	0	0	0	0	0	1
4110	MAGEA11	0	1	0	4110	Gene_ID	H. sapiens	4110	H. sapiens	MAGEA11	MAGE family member A11				Cytosol;Nuclear bodies;Nucleoplasm(Supported)				0	0	0	0	0	0	0	0	0	0	0	0	0	0	0	0	0	0	0	0	1
375791	C9orf169	0	1	0	375791	Gene_ID	H. sapiens	375791	H. sapiens	CYSRT1	cysteine rich tail 1				Midbody;Nuclear speckles;Vesicles(Approved)				0	0	0	0	0	0	0	0	0	0	0	0	0	0	0	0	0	0	0	0	1
340485	ACER2	1	0	0	340485	Gene_ID	H. sapiens	340485	H. sapiens	ACER2	alkaline ceramidase 2	GO:0090285 negative regulation of protein glycosylation in Golgi;GO:0090283 regulation of protein glycosylation in Golgi;GO:0060051 negative regulation of protein glycosylation		Enzymes/ENZYME proteins/Hydrolases					0	0	0	0	1	0	0	0	0	0	0	1	0	0	0	0	0	0	0	0	1
6366	CCL21	1	0	0	6366	Gene_ID	H. sapiens	6366	H. sapiens	CCL21	C-C motif chemokine ligand 21	GO:2000529 positive regulation of myeloid dendritic cell chemotaxis;GO:2000527 regulation of myeloid dendritic cell chemotaxis;GO:2000548 negative regulation of dendritic cell dendrite assembly					(M5883)NABA SECRETED FACTORS; (M5885)NABA MATRISOME ASSOCIATED; (M5889)NABA MATRISOME		1	0	0	0	0	0	0	0	0	0	0	1	0	0	0	0	0	1	0	0	1
57822	GRHL3	1	0	0	57822	Gene_ID	H. sapiens	57822	H. sapiens	GRHL3	grainyhead like transcription factor 3	GO:0090179 planar cell polarity pathway involved in neural tube closure;GO:0090178 regulation of establishment of planar polarity involved in neural tube closure;GO:0090177 establishment of planar polarity involved in neural tube closure		Transcription factors/Immunoglobulin fold	Nucleoplasm(Approved)				0	1	0	0	0	1	1	0	0	0	0	0	0	0	0	0	0	0	0	0	1
90019	SYT8	0	0	1	90019	Gene_ID	H. sapiens	90019	H. sapiens	SYT8	synaptotagmin 8	GO:0048791 calcium ion-regulated exocytosis of neurotransmitter;GO:0014059 regulation of dopamine secretion;GO:0007340 acrosome reaction			Cell Junctions(Supported)Nucleoplasm(Approved)				0	0	0	0	0	0	0	0	1	0	0	0	0	0	0	0	0	0	0	0	1
554202	LOC554202	0	1	0	554202	Gene_ID	H. sapiens	554202	H. sapiens	MIR31HG	MIR31 host gene								0	0	0	0	0	0	0	0	0	0	0	0	0	0	0	0	0	0	0	0	1
668	FOXL2	0	1	0	668	Gene_ID	H. sapiens	668	H. sapiens	FOXL2	forkhead box L2	GO:0033686 positive regulation of luteinizing hormone secretion;GO:0046881 positive regulation of follicle-stimulating hormone secretion;GO:0032278 positive regulation of gonadotropin secretion		Transcription factors/Helix-turn-helix domains	Cytokinetic bridge;Nucleus(Supported)				0	1	0	0	1	1	0	1	1	0	0	0	0	0	0	0	0	0	0	0	1
4613	MYCN	0	1	0	4613	Gene_ID	H. sapiens	4613	H. sapiens	MYCN	MYCN proto-oncogene, bHLH transcription factor	GO:1903800 positive regulation of production of miRNAs involved in gene silencing by miRNA;GO:1903798 regulation of production of miRNAs involved in gene silencing by miRNA;GO:2000637 positive regulation of gene silencing by miRNA		Transcription factors/Basic domains	Nucleoli;Nucleus(Approved)			(M5953)HALLMARK KRAS SIGNALING UP	0	0	0	0	0	0	0	0	0	0	0	0	0	0	0	0	0	0	0	0	1
4314	MMP3	1	0	0	4314	Gene_ID	H. sapiens	4314	H. sapiens	MMP3	matrix metallopeptidase 3	GO:0010727 negative regulation of hydrogen peroxide metabolic process;GO:1903209 positive regulation of oxidative stress-induced cell death;GO:0071732 cellular response to nitric oxide		Enzymes/{ENZYME proteins/Hydrolases,Peptidases/Metallopeptidases}	Vesicles(Supported)	Marimastat (Zinc ion binding);N-Hydroxy 1n(4-Methoxyphenyl)Sulfonyl-4-(Z,E-N-Methoxyimino)Pyrrolidine-2r-Carboxamide (Zinc ion binding);3-Methylpyridine (Zinc ion binding);A Disubstituted Succinyl Caprolactam Hydroxymate Mmp3inhibitor (Zinc ion binding);N-Hydroxy-4-[(4-Methoxylphenyl)Sulfonyl]-2,2-Dimethyl-Hexahydro-1,4-Thiazepine-3(S)-Carboxamide (Zinc ion binding);(1n)-4-N-Butoxyphenylsulfonyl-…	(M174)PID UPA UPAR PATHWAY; (M142)PID AJDISS 2PATHWAY; (M153)PID P75 NTR PATHWAY	(M5946)HALLMARK COAGULATION; (M5930)HALLMARK EPITHELIAL MESENCHYMAL TRANSITION	1	0	0	1	1	0	0	0	0	0	0	0	0	0	0	0	0	1	0	0	1
3934	LCN2	0	1	0	3934	Gene_ID	H. sapiens	3934	H. sapiens	LCN2	lipocalin 2	GO:0097577 sequestering of iron ion;GO:0015891 siderophore transport;GO:0015688 iron chelate transport			Endoplasmic reticulum(Supported)	Methyl Nonanoate (Ester) (Transporter activity);2,3-Dihydroxy-Benzoic Acid (Transporter activity);Carboxymycobactin S (Transporter activity);2,3,-Dihydroxybenzoylserine (Transporter activity);Carboxymycobactin T (Transporter activity);Trencam-3,2-Hopo (Transporter activity)			0	0	1	0	0	0	0	0	0	0	1	0	0	0	0	0	0	0	0	0	1
1536	CYBB	1	0	0	1536	Gene_ID	H. sapiens	1536	H. sapiens	CYBB	cytochrome b-245 beta chain	GO:1904845 cellular response to L-glutamine;GO:1904044 response to aldosterone;GO:1904844 response to L-glutamine		Transporters/Transport Electron Carriers		Dextromethorphan (Voltage-gated ion channel activity)	(M278)PID RAC1 PATHWAY	(M5932)HALLMARK INFLAMMATORY RESPONSE	0	0	0	0	0	0	0	0	0	0	1	0	0	0	0	0	0	0	0	1	1
762	CA4	0	1	0	762	Gene_ID	H. sapiens	762	H. sapiens	CA4	carbonic anhydrase 4	GO:0015701 bicarbonate transport;GO:0015711 organic anion transport;GO:0006820 anion transport		Enzymes/ENZYME proteins/Lyases	Vesicles(Supported)	Methyclothiazide (Zinc ion binding);Topiramate (Zinc ion binding);Ethoxzolamide (Zinc ion binding);Bendroflumethiazide (Zinc ion binding);Benzthiazide (Zinc ion binding);Cyclothiazide (Zinc ion binding);Methazolamide (Zinc ion binding);Hydroflumethiazide (Zinc ion binding);Acetazolamide (Zinc ion binding);Dorzolamide (Zinc ion binding);Chlorothiazide (Zinc ion binding);Zonisamide (Zinc ion bindin…		(M5935)HALLMARK FATTY ACID METABOLISM	0	0	0	0	0	0	0	0	0	0	0	0	0	0	0	0	0	0	0	0	1
139411	PTCHD1	1	0	0	139411	Gene_ID	H. sapiens	139411	H. sapiens	PTCHD1	patched domain containing 1	GO:0098977 inhibitory chemical synaptic transmission;GO:0098976 excitatory chemical synaptic transmission;GO:0021794 thalamus development							0	0	0	0	0	0	0	0	0	0	0	0	0	0	0	0	0	0	0	0	1
4500	MT1L	1	0	0	4500	Gene_ID	H. sapiens	4500	H. sapiens	MT1L	metallothionein 1L, pseudogene								0	0	0	0	0	0	0	0	0	0	0	0	0	0	0	0	0	0	0	0	1
5816	PVALB	1	0	0	5816	Gene_ID	H. sapiens	5816	H. sapiens	PVALB	parvalbumin	GO:0090102 cochlea development;GO:0048839 inner ear development;GO:0043583 ear development			Cell Junctions;Nucleoli;Nucleoplasm(Approved)	Formic Acid (Calcium ion binding)		(M5909)HALLMARK MYOGENESIS	0	0	0	0	0	1	0	0	0	0	0	0	0	0	0	0	0	0	0	0	1
6236	RRAD	1	0	0	6236	Gene_ID	H. sapiens	6236	H. sapiens	RRAD	RRAD, Ras related glycolysis inhibitor and calcium channel regulator	GO:1901842 negative regulation of high voltage-gated calcium channel activity;GO:1901841 regulation of high voltage-gated calcium channel activity;GO:1901386 negative regulation of voltage-gated calcium channel activity			Golgi apparatus;Nucleoplasm;Plasma membrane(Approved)		(M236)PID DELTA NP63 PATHWAY	(M5941)HALLMARK UV RESPONSE UP; (M5939)HALLMARK P53 PATHWAY	0	0	0	0	0	0	0	0	0	0	0	0	0	0	0	0	0	0	0	0	1
57497	LRFN2	1	0	0	57497	Gene_ID	H. sapiens	57497	H. sapiens	LRFN2	leucine rich repeat and fibronectin type III domain containing 2	GO:0099175 regulation of postsynapse organization;GO:0050804 modulation of chemical synaptic transmission;GO:0099173 postsynapse organization			Vesicles(Supported)				0	0	0	0	0	0	0	0	0	0	0	0	0	0	0	0	0	0	0	0	1
3001	GZMA	1	0	0	3001	Gene_ID	H. sapiens	3001	H. sapiens	GZMA	granzyme A	GO:0032078 negative regulation of endodeoxyribonuclease activity;GO:0032076 negative regulation of deoxyribonuclease activity;GO:0032071 regulation of endodeoxyribonuclease activity		Enzymes/{ENZYME proteins/Hydrolases,Peptidases/Serine-type peptidases}			(M54)PID IL12 2PATHWAY	(M5921)HALLMARK COMPLEMENT; (M5913)HALLMARK INTERFERON GAMMA RESPONSE; (M5950)HALLMARK ALLOGRAFT REJECTION	0	0	1	0	1	0	0	0	0	0	0	0	0	0	0	0	0	0	0	0	1
2069	EREG	1	0	0	2069	Gene_ID	H. sapiens	2069	H. sapiens	EREG	epiregulin	GO:0001550 ovarian cumulus expansion;GO:0048160 primary follicle stage;GO:0048165 fused antrum stage			Vesicles(Approved)		(M201)PID ERBB NETWORK PATHWAY; (M13)PID ERBB4 PATHWAY; (M5883)NABA SECRETED FACTORS	(M5902)HALLMARK APOPTOSIS; (M5932)HALLMARK INFLAMMATORY RESPONSE; (M5953)HALLMARK KRAS SIGNALING UP	1	1	0	0	0	0	0	0	0	0	0	1	0	0	0	0	0	1	0	1	1
313	AOAH	1	0	0	313	Gene_ID	H. sapiens	313	H. sapiens	AOAH	acyloxyacyl hydrolase	GO:0009104 lipopolysaccharide catabolic process;GO:0008653 lipopolysaccharide metabolic process;GO:0044247 cellular polysaccharide catabolic process		Enzymes/ENZYME proteins/Hydrolases					0	0	0	0	0	0	0	0	0	0	0	0	0	0	0	0	0	0	0	0	1
3225	HOXC9	0	1	0	3225	Gene_ID	H. sapiens	3225	H. sapiens	HOXC9	homeobox C9	GO:0009954 proximal/distal pattern formation;GO:0048704 embryonic skeletal system morphogenesis;GO:0048706 embryonic skeletal system development		Transcription factors/Helix-turn-helix domains	Nucleoplasm(Enhanced)				0	0	0	0	0	1	1	1	0	0	0	0	0	0	0	0	0	0	0	0	1
7447	VSNL1	1	0	0	7447	Gene_ID	H. sapiens	7447	H. sapiens	VSNL1	visinin like 1	GO:0035774 positive regulation of insulin secretion involved in cellular response to glucose stimulus;GO:0046676 negative regulation of insulin secretion;GO:0061178 regulation of insulin secretion involved in cellular response to glucose stimulus							0	0	0	0	0	0	0	0	1	0	0	0	0	0	0	0	0	0	0	0	1
7780	SLC30A2	1	0	0	7780	Gene_ID	H. sapiens	7780	H. sapiens	SLC30A2	solute carrier family 30 member 2	GO:0061090 positive regulation of sequestering of zinc ion;GO:0061088 regulation of sequestering of zinc ion;GO:0032119 sequestering of zinc ion		Transporters/Electrochemical Potential-driven transporters	Vesicles(Approved)				1	0	0	0	0	0	0	0	0	0	1	0	0	0	0	0	0	0	0	0	1
3620	IDO1	1	0	0	3620	Gene_ID	H. sapiens	3620	H. sapiens	IDO1	indoleamine 2,3-dioxygenase 1	GO:0034354 'de novo' NAD biosynthetic process from tryptophan;GO:0019441 tryptophan catabolic process to kynurenine;GO:0034627 'de novo' NAD biosynthetic process		Enzymes/ENZYME proteins/Oxidoreductases				(M5913)HALLMARK INTERFERON GAMMA RESPONSE	1	0	1	0	0	0	0	0	0	0	0	1	0	0	0	0	0	0	0	0	1
342527	SMTNL2	0	1	0	342527	Gene_ID	H. sapiens	342527	H. sapiens	SMTNL2	smoothelin like 2	GO:0030036 actin cytoskeleton organization;GO:0030029 actin filament-based process;GO:0007010 cytoskeleton organization							0	0	0	0	0	0	0	0	0	0	0	0	0	0	0	0	0	0	0	0	1
401145	FAM190A	1	0	0	401145	Gene_ID	H. sapiens	401145	H. sapiens	CCSER1	coiled-coil serine rich protein 1								0	0	0	0	0	0	0	0	0	0	0	0	0	0	0	0	0	0	0	0	1
2201	FBN2	0	0	1	2201	Gene_ID	H. sapiens	2201	H. sapiens	FBN2	fibrillin 2	GO:0035583 sequestering of TGFbeta in extracellular matrix;GO:0035581 sequestering of extracellular ligand from receptor;GO:0060346 bone trabecula formation			Cytosol;Nucleoplasm(Approved)		(M3008)NABA ECM GLYCOPROTEINS; (M5884)NABA CORE MATRISOME; (M5889)NABA MATRISOME	(M5930)HALLMARK EPITHELIAL MESENCHYMAL TRANSITION	0	0	0	1	0	1	1	0	0	1	0	0	0	0	0	0	0	0	0	0	1
2946	GSTM2	1	0	0	2946	Gene_ID	H. sapiens	2946	H. sapiens	GSTM2	glutathione S-transferase mu 2	GO:0014809 regulation of skeletal muscle contraction by regulation of release of sequestered calcium ion;GO:0010881 regulation of cardiac muscle contraction by regulation of the release of sequestered calcium ion;GO:0060316 positive regulation of ryanodine-sensitive calcium-release channel activity		Enzymes/ENZYME proteins/Transferases	Cytosol(Enhanced)	Glutathione (Receptor binding);Glutathione S-(2,4 Dinitrobenzene) (Receptor binding);Oxidized Glutathione Disulfide (Receptor binding);S-METHYL-GLUTATHIONE (Receptor binding)		(M5892)HALLMARK CHOLESTEROL HOMEOSTASIS	1	0	0	0	0	0	0	0	0	0	0	0	0	0	0	1	1	0	0	0	1
7980	TFPI2	1	0	0	7980	Gene_ID	H. sapiens	7980	H. sapiens	TFPI2	tissue factor pathway inhibitor 2	GO:0071498 cellular response to fluid shear stress;GO:0034405 response to fluid shear stress;GO:0010951 negative regulation of endopeptidase activity						(M5946)HALLMARK COAGULATION; (M5921)HALLMARK COMPLEMENT; (M5930)HALLMARK EPITHELIAL MESENCHYMAL TRANSITION	0	0	0	0	1	0	0	0	0	0	0	0	0	0	0	0	0	0	0	0	1
23119	HIC2	0	1	0	23119	Gene_ID	H. sapiens	23119	H. sapiens	HIC2	HIC ZBTB transcriptional repressor 2	GO:0045892 negative regulation of transcription, DNA-templated;GO:1903507 negative regulation of nucleic acid-templated transcription;GO:1902679 negative regulation of RNA biosynthetic process		Transcription factors/Zinc-coordinating DNA-binding domains	Nucleus(Supported)				0	0	0	0	0	0	0	0	0	0	0	0	0	0	0	0	0	0	0	0	1
5744	PTHLH	1	0	0	5744	Gene_ID	H. sapiens	5744	H. sapiens	PTHLH	parathyroid hormone like hormone	GO:0061182 negative regulation of chondrocyte development;GO:0061181 regulation of chondrocyte development;GO:0032331 negative regulation of chondrocyte differentiation			Cytosol;Nucleoplasm(Supported)Golgi apparatus(Approved)		(M211)PID HEDGEHOG 2PATHWAY	(M5930)HALLMARK EPITHELIAL MESENCHYMAL TRANSITION	1	1	0	0	0	0	1	0	0	0	0	1	1	0	0	0	0	0	0	0	1
241	ALOX5AP	1	0	0	241	Gene_ID	H. sapiens	241	H. sapiens	ALOX5AP	arachidonate 5-lipoxygenase activating protein	GO:2001301 lipoxin biosynthetic process;GO:2001300 lipoxin metabolic process;GO:0019370 leukotriene biosynthetic process				DG031 (Protein n-terminus binding);AM103 (Protein n-terminus binding)			0	0	0	0	0	0	0	0	0	0	0	0	0	0	0	1	0	0	0	0	1
5918	RARRES1	0	1	0	5918	Gene_ID	H. sapiens	5918	H. sapiens	RARRES1	retinoic acid receptor responder 1	GO:0010951 negative regulation of endopeptidase activity;GO:0010466 negative regulation of peptidase activity;GO:0045861 negative regulation of proteolysis			Endoplasmic reticulum;Golgi apparatus(Approved)	Tretinoin			0	0	0	0	1	0	0	0	0	0	0	0	0	0	0	0	0	0	0	0	1
339983	NAT8L	0	1	0	339983	Gene_ID	H. sapiens	339983	H. sapiens	NAT8L	N-acetyltransferase 8 like	GO:0008652 cellular amino acid biosynthetic process;GO:0006520 cellular amino acid metabolic process;GO:0046394 carboxylic acid biosynthetic process		Enzymes/ENZYME proteins/Transferases	Mitochondria(Supported)				0	0	0	0	0	0	0	0	0	0	0	0	0	0	0	0	0	0	0	0	1
4499	MT1M	1	0	0	4499	Gene_ID	H. sapiens	4499	H. sapiens	MT1M	metallothionein 1M	GO:0010273 detoxification of copper ion;GO:0006882 cellular zinc ion homeostasis;GO:1990169 stress response to copper ion							1	0	1	0	0	0	0	0	0	0	1	0	0	0	0	0	0	0	0	0	1
3224	HOXC8	0	1	0	3224	Gene_ID	H. sapiens	3224	H. sapiens	HOXC8	homeobox C8	GO:0048705 skeletal system morphogenesis;GO:0009952 anterior/posterior pattern specification;GO:0000122 negative regulation of transcription by RNA polymerase II		Transcription factors/Helix-turn-helix domains	Microtubules;Nucleoplasm(Approved)				0	0	0	0	0	0	1	1	0	0	0	0	0	0	0	0	0	0	0	0	1
266722	HS6ST3	1	0	0	266722	Gene_ID	H. sapiens	266722	H. sapiens	HS6ST3	heparan sulfate 6-O-sulfotransferase 3	GO:0015015 heparan sulfate proteoglycan biosynthetic process, enzymatic modification;GO:0015012 heparan sulfate proteoglycan biosynthetic process;GO:0030201 heparan sulfate proteoglycan metabolic process			Actin filaments;Nuclear membrane;Nucleoplasm(Approved)				0	0	0	0	0	0	0	0	0	0	0	0	0	0	0	0	0	0	0	0	1
266977	GPR110	0	0	1	266977	Gene_ID	H. sapiens	266977	H. sapiens	ADGRF1	adhesion G protein-coupled receptor F1	GO:0032793 positive regulation of CREB transcription factor activity;GO:0007189 adenylate cyclase-activating G protein-coupled receptor signaling pathway;GO:0007613 memory		G-protein coupled receptors/{Family 2 (B) receptors,GPCRs excl olfactory receptors}		751689 (G-protein coupled receptor activity)			0	0	0	0	0	0	0	0	0	0	0	0	0	0	0	0	0	0	0	0	1
51338	MS4A4A	1	0	0	51338	Gene_ID	H. sapiens	51338	H. sapiens	MS4A4A	membrane spanning 4-domains A4A								0	0	0	0	0	0	0	0	0	0	0	0	0	0	0	0	0	0	0	0	1
2919	CXCL1	1	0	0	2919	Gene_ID	H. sapiens	2919	H. sapiens	CXCL1	C-X-C motif chemokine ligand 1	GO:0030593 neutrophil chemotaxis;GO:0043312 neutrophil degranulation;GO:0071621 granulocyte chemotaxis					(M196)PID IL23 PATHWAY; (M5883)NABA SECRETED FACTORS; (M5885)NABA MATRISOME ASSOCIATED	(M5897)HALLMARK IL6 JAK STAT3 SIGNALING; (M5921)HALLMARK COMPLEMENT; (M5930)HALLMARK EPITHELIAL MESENCHYMAL TRANSITION	1	0	1	0	0	0	0	0	0	0	0	1	0	0	0	0	0	1	0	0	1
257407	C2orf72	0	1	0	257407	Gene_ID	H. sapiens	257407	H. sapiens	C2orf72	chromosome 2 open reading frame 72				Nucleus;Plasma membrane(Approved)				0	0	0	0	0	0	0	0	0	0	0	0	0	0	0	0	0	0	0	0	1
5275	SERPINB13	1	0	0	5275	Gene_ID	H. sapiens	5275	H. sapiens	SERPINB13	serpin family B member 13	GO:1902173 negative regulation of keratinocyte apoptotic process;GO:1902172 regulation of keratinocyte apoptotic process;GO:0097283 keratinocyte apoptotic process			Cytosol(Supported)Nuclear speckles(Uncertain)		(M3468)NABA ECM REGULATORS; (M5885)NABA MATRISOME ASSOCIATED; (M5889)NABA MATRISOME		1	1	0	0	1	0	0	0	0	0	0	0	0	0	0	0	0	0	0	0	1
94122	SYTL5	1	0	0	94122	Gene_ID	H. sapiens	94122	H. sapiens	SYTL5	synaptotagmin like 5	GO:0006887 exocytosis;GO:0006886 intracellular protein transport;GO:0032940 secretion by cell			Cytosol;Microtubules;Nucleoplasm(Approved)				0	0	0	0	0	0	0	0	0	0	0	0	0	0	0	0	0	0	0	0	1
112714	TUBA3E	0	1	0	112714	Gene_ID	H. sapiens	112714	H. sapiens	TUBA3E	tubulin alpha 3e	GO:0000226 microtubule cytoskeleton organization;GO:0007017 microtubule-based process;GO:0000278 mitotic cell cycle			Microtubules(Supported)	CYT997 (Structural constituent of cytoskeleton)			0	0	0	0	0	0	0	0	0	0	0	0	0	0	0	0	0	0	0	0	1
60437	CDH26	1	0	0	60437	Gene_ID	H. sapiens	60437	H. sapiens	CDH26	cadherin 26	GO:0016339 calcium-dependent cell-cell adhesion via plasma membrane cell adhesion molecules;GO:0035710 CD4-positive, alpha-beta T cell activation;GO:0044331 cell-cell adhesion mediated by cadherin			Microtubules;Plasma membrane(Approved)				0	0	0	0	0	0	0	0	0	0	0	1	0	0	0	0	0	0	0	0	1
54084	C21orf29	0	1	0	54084	Gene_ID	H. sapiens	54084	H. sapiens	TSPEAR	thrombospondin type laminin G domain and EAR repeats	GO:0034505 tooth mineralization;GO:0008593 regulation of Notch signaling pathway;GO:0042476 odontogenesis					(M3008)NABA ECM GLYCOPROTEINS; (M5884)NABA CORE MATRISOME; (M5889)NABA MATRISOME		0	0	0	1	0	1	0	0	0	0	0	0	0	0	0	0	0	0	0	0	1
10083	USH1C	0	1	0	10083	Gene_ID	H. sapiens	10083	H. sapiens	USH1C	USH1 protein network component harmonin	GO:0046549 retinal cone cell development;GO:0042670 retinal cone cell differentiation;GO:0032532 regulation of microvillus length			Cytosol(Enhanced)			(M5953)HALLMARK KRAS SIGNALING UP	0	1	0	0	0	1	0	1	0	0	0	0	0	0	0	0	0	0	0	0	1
645037	GAGE2B	0	1	0	645037	Gene_ID	H. sapiens	645037	H. sapiens	GAGE2B	G antigen 2B	GO:0008150 biological_process							0	0	0	0	0	0	0	0	0	0	0	0	0	0	0	0	0	0	0	0	1
283987	C17orf28	1	0	0	283987	Gene_ID	H. sapiens	283987	H. sapiens	HID1	HID1 domain containing				Cytosol;Golgi apparatus(Supported)				0	0	0	0	0	0	0	0	0	0	0	0	0	0	0	0	0	0	0	0	1
25806	VAX2	0	1	0	25806	Gene_ID	H. sapiens	25806	H. sapiens	VAX2	ventral anterior homeobox 2	GO:0048048 embryonic eye morphogenesis;GO:0009950 dorsal/ventral axis specification;GO:0007398 ectoderm development		Transcription factors/Helix-turn-helix domains	Nuclear speckles(Approved)				0	0	0	0	0	1	0	1	0	0	0	0	0	0	0	0	0	0	0	0	1
2212	FCGR2A	1	0	0	2212	Gene_ID	H. sapiens	2212	H. sapiens	FCGR2A	Fc fragment of IgG receptor IIa	GO:0038096 Fc-gamma receptor signaling pathway involved in phagocytosis;GO:0002431 Fc receptor mediated stimulatory signaling pathway;GO:0038094 Fc-gamma receptor signaling pathway		CD markers		Cetuximab;Etanercept;Immune Globulin Human;Adalimumab;Abciximab;Gemtuzumab ozogamicin;Trastuzumab;Rituximab;Basiliximab;Muromonab;Ibritumomab tiuxetan;Tositumomab;Alemtuzumab;Alefacept;Efalizumab;Natalizumab;Palivizumab;Daclizumab;Bevacizumab	(M169)PID INTEGRIN2 PATHWAY; (M50)PID PTP1B PATHWAY		0	0	0	0	0	0	0	0	0	0	0	0	0	0	0	0	0	0	0	0	1
25884	CHRDL2	1	0	0	25884	Gene_ID	H. sapiens	25884	H. sapiens	CHRDL2	chordin like 2	GO:0051216 cartilage development;GO:0061448 connective tissue development;GO:0001503 ossification			Mitochondria(Uncertain)		(M5883)NABA SECRETED FACTORS; (M5885)NABA MATRISOME ASSOCIATED; (M5889)NABA MATRISOME		1	0	0	0	0	0	1	0	0	0	0	0	0	0	0	0	0	0	0	0	1
3195	TLX1	0	1	0	3195	Gene_ID	H. sapiens	3195	H. sapiens	TLX1	T cell leukemia homeobox 1	GO:0045944 positive regulation of transcription by RNA polymerase II;GO:0045893 positive regulation of transcription, DNA-templated;GO:1903508 positive regulation of nucleic acid-templated transcription		Transcription factors/Helix-turn-helix domains				(M5956)HALLMARK KRAS SIGNALING DN	0	0	0	0	0	0	0	0	0	0	0	0	0	0	0	0	0	0	0	0	1
4688	NCF2	1	0	0	4688	Gene_ID	H. sapiens	4688	H. sapiens	NCF2	neutrophil cytosolic factor 2	GO:0002479 antigen processing and presentation of exogenous peptide antigen via MHC class I, TAP-dependent;GO:0042590 antigen processing and presentation of exogenous peptide antigen via MHC class I;GO:0042554 superoxide anion generation			Cytosol(Enhanced)Nucleoli(Supported)		(M278)PID RAC1 PATHWAY		0	0	0	0	0	0	0	0	0	0	1	0	0	0	0	0	0	0	0	0	1
284837	LOC284837	1	0	0	284837	Gene_ID	H. sapiens	284837	H. sapiens	AATBC	apoptosis associated transcript in bladder cancer								0	0	0	0	0	0	0	0	0	0	0	0	0	0	0	0	0	0	0	0	1
2152	F3	1	0	0	2152	Gene_ID	H. sapiens	2152	H. sapiens	F3	coagulation factor III, tissue factor	GO:0002543 activation of blood coagulation via clotting cascade;GO:0007598 blood coagulation, extrinsic pathway;GO:0010641 positive regulation of platelet-derived growth factor receptor signaling pathway		CD markers	Vesicles(Enhanced)	Coagulation factor VIIa Recombinant Human (Protease binding);2-(4-HYDROXY-5-PHENYL-1H-PYRAZOL-3-YL)-1H-BENZOIMIDAZOLE-5-CARBOXAMIDINE (Protease binding);[2'-HYDROXY-3'-(1H-PYRROLO[3,2-C]PYRIDIN-2-YL)-BIPHENYL-3-YLMETHYL]-UREA (Protease binding);{5-(5-AMINO-1H-PYRROLO[3,2-B]PYRIDIN-2-YL)-6-HYDROXY-3'-NITRO-BIPHENYL-3-YL]-ACETIC ACID (Protease binding)		(M5946)HALLMARK COAGULATION; (M5942)HALLMARK UV RESPONSE DN; (M5932)HALLMARK INFLAMMATORY RESPONSE	1	0	0	0	1	0	0	0	0	0	0	0	0	0	0	0	0	1	0	1	1
387758	FIBIN	1	0	0	387758	Gene_ID	H. sapiens	387758	H. sapiens	FIBIN	fin bud initiation factor homolog	GO:0071548 response to dexamethasone;GO:0010042 response to manganese ion;GO:0070528 protein kinase C signaling							0	0	0	0	0	0	0	0	0	0	0	0	0	0	0	0	0	0	0	0	1
597	BCL2A1	1	0	0	597	Gene_ID	H. sapiens	597	H. sapiens	BCL2A1	BCL2 related protein A1	GO:0021987 cerebral cortex development;GO:0097192 extrinsic apoptotic signaling pathway in absence of ligand;GO:0021543 pallium development					(M10)PID BCR 5PATHWAY; (M145)PID P53 DOWNSTREAM PATHWAY	(M5890)HALLMARK TNFA SIGNALING VIA NFKB	0	0	0	0	0	0	0	0	0	0	0	0	0	0	0	0	0	0	0	0	1
80380	PDCD1LG2	1	0	0	80380	Gene_ID	H. sapiens	80380	H. sapiens	PDCD1LG2	programmed cell death 1 ligand 2	GO:0046007 negative regulation of activated T cell proliferation;GO:0031295 T cell costimulation;GO:0046006 regulation of activated T cell proliferation		CD markers	Cytosol(Approved)			(M5953)HALLMARK KRAS SIGNALING UP	0	0	1	0	0	0	0	0	0	0	0	1	0	0	0	0	0	0	0	0	1
64711	HS3ST6	1	0	0	64711	Gene_ID	H. sapiens	64711	H. sapiens	HS3ST6	heparan sulfate-glucosamine 3-sulfotransferase 6	GO:0001835 blastocyst hatching;GO:0035188 hatching;GO:0006024 glycosaminoglycan biosynthetic process		Enzymes/ENZYME proteins/Transferases					0	0	0	0	0	0	1	0	0	0	0	0	0	0	0	0	0	0	0	0	1
6348	CCL3	1	0	0	6348	Gene_ID	H. sapiens	6348	H. sapiens	CCL3	C-C motif chemokine ligand 3	GO:0014808 release of sequestered calcium ion into cytosol by sarcoplasmic reticulum;GO:1903514 release of sequestered calcium ion into cytosol by endoplasmic reticulum;GO:2000503 positive regulation of natural killer cell chemotaxis				ROX-888 (Protein kinase activity)	(M54)PID IL12 2PATHWAY; (M5883)NABA SECRETED FACTORS; (M5885)NABA MATRISOME ASSOCIATED		1	0	1	0	0	0	0	0	1	0	0	1	0	0	0	0	0	1	0	0	1
51087	YBX2	0	1	0	51087	Gene_ID	H. sapiens	51087	H. sapiens	YBX2	Y-box binding protein 2	GO:0009386 translational attenuation;GO:0048599 oocyte development;GO:0120162 positive regulation of cold-induced thermogenesis		Transcription factors	Nucleoli fibrillar center(Supported)			(M5951)HALLMARK SPERMATOGENESIS; (M5956)HALLMARK KRAS SIGNALING DN	0	0	0	0	0	0	0	0	0	0	0	0	0	0	0	0	0	0	0	0	1
719	C3AR1	1	0	0	719	Gene_ID	H. sapiens	719	H. sapiens	C3AR1	complement C3a receptor 1	GO:0090023 positive regulation of neutrophil chemotaxis;GO:0010759 positive regulation of macrophage chemotaxis;GO:0071624 positive regulation of granulocyte chemotaxis		G-protein coupled receptors/{Chemokines and chemotactic factors receptors,GPCRs excl olfactory receptors}				(M5932)HALLMARK INFLAMMATORY RESPONSE; (M5953)HALLMARK KRAS SIGNALING UP	1	0	1	0	0	0	0	0	0	0	0	0	0	0	0	0	0	0	0	1	1
6351	CCL4	1	0	0	6351	Gene_ID	H. sapiens	6351	H. sapiens	CCL4	C-C motif chemokine ligand 4	GO:2000503 positive regulation of natural killer cell chemotaxis;GO:0043922 negative regulation by host of viral transcription;GO:2000501 regulation of natural killer cell chemotaxis					(M54)PID IL12 2PATHWAY; (M5883)NABA SECRETED FACTORS; (M5885)NABA MATRISOME ASSOCIATED	(M5950)HALLMARK ALLOGRAFT REJECTION; (M5890)HALLMARK TNFA SIGNALING VIA NFKB	1	0	0	0	0	0	0	0	0	0	0	0	0	0	0	0	0	1	0	0	1
7054	TH	1	0	0	7054	Gene_ID	H. sapiens	7054	H. sapiens	TH	tyrosine hydroxylase	GO:0006585 dopamine biosynthetic process from tyrosine;GO:0042418 epinephrine biosynthetic process;GO:0042414 epinephrine metabolic process		Enzymes/ENZYME proteins/Oxidoreductases		L-Phenylalanine (Tyrosine 3-monooxygenase activity);L-Tyrosine (Tyrosine 3-monooxygenase activity);Sapropterin (Tyrosine 3-monooxygenase activity);Metyrosine (Tyrosine 3-monooxygenase activity);Meta-Tyrosine (Tyrosine 3-monooxygenase activity);7,8-Dihydrobiopterin (Tyrosine 3-monooxygenase activity)	(M199)PID P38 MK2 PATHWAY; (M275)PID ALPHA SYNUCLEIN PATHWAY; (M2579)ST DIFFERENTIATION PATHWAY IN PC12 CELLS	(M5907)HALLMARK ESTROGEN RESPONSE LATE	0	0	1	0	0	1	0	0	0	0	1	0	0	0	0	0	1	0	0	0	1
8877	SPHK1	1	0	0	8877	Gene_ID	H. sapiens	8877	H. sapiens	SPHK1	sphingosine kinase 1	GO:1905364 regulation of endosomal vesicle fusion;GO:0046521 sphingoid catabolic process;GO:1900060 negative regulation of ceramide biosynthetic process		Enzymes/ENZYME proteins/Transferases	Cytosol;Plasma membrane(Supported)		(M155)PID S1P META PATHWAY; (M103)PID S1P S1P1 PATHWAY; (M53)PID INTEGRIN3 PATHWAY	(M5932)HALLMARK INFLAMMATORY RESPONSE; (M5909)HALLMARK MYOGENESIS; (M5939)HALLMARK P53 PATHWAY	1	0	0	0	0	0	0	0	0	0	0	1	0	0	0	0	0	1	0	1	1
51311	TLR8	1	0	0	51311	Gene_ID	H. sapiens	51311	H. sapiens	TLR8	toll like receptor 8	GO:0034158 toll-like receptor 8 signaling pathway;GO:2001183 negative regulation of interleukin-12 secretion;GO:0045356 positive regulation of interferon-alpha biosynthetic process		CD markers		Imiquimod (Single-stranded rna binding)		(M5953)HALLMARK KRAS SIGNALING UP	0	0	0	0	0	0	0	0	1	0	0	0	0	0	0	0	0	1	0	0	1
4102	MAGEA3	0	0	1	4102	Gene_ID	H. sapiens	4102	H. sapiens	MAGEA3	MAGE family member A3	GO:1902236 negative regulation of endoplasmic reticulum stress-induced intrinsic apoptotic signaling pathway;GO:0043154 negative regulation of cysteine-type endopeptidase activity involved in apoptotic process;GO:1902235 regulation of endoplasmic reticulum stress-induced intrinsic apoptotic signaling pathway							0	0	0	0	1	0	0	0	0	0	0	0	0	0	0	0	0	0	0	0	1
6532	SLC6A4	0	1	0	6532	Gene_ID	H. sapiens	6532	H. sapiens	SLC6A4	solute carrier family 6 member 4	GO:0021941 negative regulation of cerebellar granule cell precursor proliferation;GO:0014064 positive regulation of serotonin secretion;GO:0021936 regulation of cerebellar granule cell precursor proliferation		Transporters/Electrochemical Potential-driven transporters	Golgi apparatus;Vesicles(Supported)	Fluvoxamine (Serotonin:sodium symporter activity);Amphetamine (Serotonin:sodium symporter activity);Phentermine (Serotonin:sodium symporter activity);Tramadol (Serotonin:sodium symporter activity);Citalopram (Serotonin:sodium symporter activity);Venlafaxine (Serotonin:sodium symporter activity);Atomoxetine (Serotonin:sodium symporter activity);Amitriptyline (Serotonin:sodium symporter activity);P…			0	0	1	0	0	0	0	0	1	0	0	0	0	0	0	0	0	0	0	0	1
26047	CNTNAP2	0	0	1	26047	Gene_ID	H. sapiens	26047	H. sapiens	CNTNAP2	contactin associated protein 2	GO:0071109 superior temporal gyrus development;GO:0045163 clustering of voltage-gated potassium channels;GO:0042297 vocal learning							0	0	0	0	0	0	0	0	0	0	0	0	0	0	0	0	0	0	0	0	1
9543	IGDCC3	0	1	0	9543	Gene_ID	H. sapiens	9543	H. sapiens	IGDCC3	immunoglobulin superfamily DCC subclass member 3	GO:0050885 neuromuscular process controlling balance;GO:0050905 neuromuscular process;GO:0050877 nervous system process							0	0	0	0	0	0	0	0	0	0	0	0	0	0	0	0	0	0	0	0	1
6280	S100A9	1	0	0	6280	Gene_ID	H. sapiens	6280	H. sapiens	S100A9	S100 calcium binding protein A9	GO:0032119 sequestering of zinc ion;GO:0070488 neutrophil aggregation;GO:0035606 peptidyl-cysteine S-trans-nitrosylation			Cell Junctions;Cytosol(Supported)Nucleoplasm(Uncertain)		(M264)PID TOLL ENDOGENOUS PATHWAY; (M5883)NABA SECRETED FACTORS; (M5885)NABA MATRISOME ASSOCIATED	(M5921)HALLMARK COMPLEMENT; (M5907)HALLMARK ESTROGEN RESPONSE LATE	1	0	1	0	1	0	0	0	0	0	1	1	0	0	0	0	0	1	0	0	1
10232	MSLN	1	0	0	10232	Gene_ID	H. sapiens	10232	H. sapiens	MSLN	mesothelin	GO:0031016 pancreas development;GO:0007160 cell-matrix adhesion;GO:0043687 post-translational protein modification			Nucleoplasm;Vesicles(Approved)				0	0	0	0	0	0	0	0	0	0	0	0	0	0	0	0	0	0	0	0	1
3887	KRT81	1	0	0	3887	Gene_ID	H. sapiens	3887	H. sapiens	KRT81	keratin 81	GO:0070268 cornification;GO:0031424 keratinization;GO:0030216 keratinocyte differentiation							0	1	0	0	0	0	0	0	0	0	0	0	0	0	0	0	0	0	0	0	1
6273	S100A2	0	1	0	6273	Gene_ID	H. sapiens	6273	H. sapiens	S100A2	S100 calcium binding protein A2	GO:0043542 endothelial cell migration;GO:0010631 epithelial cell migration;GO:0090132 epithelium migration			Cytosol;Nucleus(Supported)Nucleoli;Plasma membrane(Approved)	Olopatadine (Identical protein binding)	(M256)PID TAP63 PATHWAY; (M19)PID P73PATHWAY; (M145)PID P53 DOWNSTREAM PATHWAY		0	0	0	0	0	0	0	0	0	0	0	0	0	0	0	0	0	0	0	0	1
83992	CTTNBP2	0	1	0	83992	Gene_ID	H. sapiens	83992	H. sapiens	CTTNBP2	cortactin binding protein 2	GO:1905274 regulation of modification of postsynaptic actin cytoskeleton;GO:0099159 regulation of modification of postsynaptic structure;GO:0098885 modification of postsynaptic actin cytoskeleton			Cytosol;Midbody ring(Approved)				0	0	0	0	0	0	0	0	0	0	0	0	0	0	0	0	0	0	0	0	1
51083	GAL	0	0	1	51083	Gene_ID	H. sapiens	51083	H. sapiens	GAL	galanin and GMAP prepropeptide	GO:0051464 positive regulation of cortisol secretion;GO:0051462 regulation of cortisol secretion;GO:2000851 positive regulation of glucocorticoid secretion			Golgi apparatus;Vesicles(Approved)			(M5941)HALLMARK UV RESPONSE UP; (M5907)HALLMARK ESTROGEN RESPONSE LATE	1	1	0	0	0	0	0	0	1	0	0	1	0	0	0	0	1	0	0	0	1
57132	C18orf2	0	1	0	57132	Gene_ID	H. sapiens	57132	H. sapiens	CHMP1B	charged multivesicular body protein 1B	GO:0039702 viral budding via host ESCRT complex;GO:1904903 ESCRT III complex disassembly;GO:0061952 midbody abscission			Midbody(Supported)Nucleus(Approved)				0	0	0	0	0	0	0	0	0	0	0	0	0	0	0	0	0	0	0	0	1
3227	HOXC11	0	1	0	3227	Gene_ID	H. sapiens	3227	H. sapiens	HOXC11	homeobox C11	GO:0060272 embryonic skeletal joint morphogenesis;GO:0072498 embryonic skeletal joint development;GO:0001759 organ induction		Transcription factors/Helix-turn-helix domains	Nucleoplasm(Supported)Cytosol(Approved)				0	0	0	0	0	1	1	1	0	1	0	0	0	0	1	0	0	0	0	0	1
338707	B4GALNT4	0	1	0	338707	Gene_ID	H. sapiens	338707	H. sapiens	B4GALNT4	beta-1,4-N-acetyl-galactosaminyltransferase 4			Enzymes/ENZYME proteins/Transferases	Cytokinetic bridge;Microtubules;Mitotic spindle;Nucleoplasm(Approved)				0	0	0	0	0	0	0	0	0	0	0	0	0	0	0	0	0	0	0	0	1
2357	FPR1	1	0	0	2357	Gene_ID	H. sapiens	2357	H. sapiens	FPR1	formyl peptide receptor 1	GO:0002430 complement receptor mediated signaling pathway;GO:0000187 activation of MAPK activity;GO:0043312 neutrophil degranulation		G-protein coupled receptors/{Chemokines and chemotactic factors receptors,GPCRs excl olfactory receptors}	Golgi apparatus;Nucleoli;Nucleus(Approved)	Nedocromil (Receptor activity)	(M174)PID UPA UPAR PATHWAY	(M5932)HALLMARK INFLAMMATORY RESPONSE; (M5913)HALLMARK INTERFERON GAMMA RESPONSE	1	0	0	0	0	0	0	0	0	0	0	0	0	0	0	0	0	1	0	0	1
131177	FAM3D	1	0	0	131177	Gene_ID	H. sapiens	131177	H. sapiens	FAM3D	FAM3 metabolism regulating signaling molecule D	GO:0070093 negative regulation of glucagon secretion;GO:0070092 regulation of glucagon secretion;GO:0046676 negative regulation of insulin secretion							0	0	0	0	0	0	0	0	1	0	0	0	0	0	0	0	0	0	0	0	1
2938	GSTA1	1	0	0	2938	Gene_ID	H. sapiens	2938	H. sapiens	GSTA1	glutathione S-transferase alpha 1	GO:0043651 linoleic acid metabolic process;GO:1901687 glutathione derivative biosynthetic process;GO:0006693 prostaglandin metabolic process		Enzymes/ENZYME proteins/Transferases	Cytosol(Supported)	Glutathione (Glutathione transferase activity);S-Hydroxycysteine (Glutathione transferase activity);2-Hydroxyethyl Disulfide (Glutathione transferase activity);N-(4-Aminobutanoyl)-S-(4-Methoxybenzyl)-L-Cysteinylglycine (Glutathione transferase activity);Glutathione Sulfonic Acid (Glutathione transferase activity);S-Benzyl-Glutathione (Glutathione transferase activity);S-Hexylglutathione (Glutathi…			0	1	0	0	0	0	0	0	0	0	0	0	0	0	0	1	1	0	0	0	1
4604	MYBPC1	1	0	0	4604	Gene_ID	H. sapiens	4604	H. sapiens	MYBPC1	myosin binding protein C1	GO:0030049 muscle filament sliding;GO:0033275 actin-myosin filament sliding;GO:0070252 actin-mediated cell contraction							0	0	0	0	0	0	0	0	0	0	0	0	0	0	0	0	0	0	0	0	1
1825	DSC3	1	0	0	1825	Gene_ID	H. sapiens	1825	H. sapiens	DSC3	desmocollin 3	GO:0070268 cornification;GO:0031424 keratinization;GO:0030216 keratinocyte differentiation			Cell Junctions(Enhanced)Plasma membrane(Supported)			(M5915)HALLMARK APICAL JUNCTION	0	1	0	0	0	0	1	0	0	0	0	0	0	0	0	0	0	0	0	0	1
1515	CTSL2	0	0	1	1515	Gene_ID	H. sapiens	1515	H. sapiens	CTSV	cathepsin V	GO:0060008 Sertoli cell differentiation;GO:0046697 decidualization;GO:0045616 regulation of keratinocyte differentiation		Enzymes/{ENZYME proteins/Hydrolases,Peptidases/Cysteine-type peptidases}	Cytosol;Nucleoli fibrillar center;Nucleus;Plasma membrane(Approved)	3-amino-5-phenylpentane (Peptide binding);4-Methylpiperazin-1-Yl Carbonyl Group (Peptide binding)	(M3468)NABA ECM REGULATORS; (M5885)NABA MATRISOME ASSOCIATED; (M5889)NABA MATRISOME	(M5946)HALLMARK COAGULATION; (M5941)HALLMARK UV RESPONSE UP; (M5921)HALLMARK COMPLEMENT	0	1	0	1	0	0	0	0	0	1	0	0	0	1	0	0	0	0	0	0	1
11326	VSIG4	1	0	0	11326	Gene_ID	H. sapiens	11326	H. sapiens	VSIG4	V-set and immunoglobulin domain containing 4	GO:0045957 negative regulation of complement activation, alternative pathway;GO:0030451 regulation of complement activation, alternative pathway;GO:0045916 negative regulation of complement activation			Cytosol;Nucleoli;Plasma membrane(Uncertain)				0	0	1	0	1	0	0	0	0	0	0	1	0	0	0	0	0	0	0	0	1
9229	DLGAP1	0	1	0	9229	Gene_ID	H. sapiens	9229	H. sapiens	DLGAP1	DLG associated protein 1	GO:0007268 chemical synaptic transmission;GO:0098916 anterograde trans-synaptic signaling;GO:0099537 trans-synaptic signaling							0	0	0	0	0	0	0	0	0	0	0	0	0	0	0	0	0	0	0	0	1
6928	HNF1B	1	0	0	6928	Gene_ID	H. sapiens	6928	H. sapiens	HNF1B	HNF1 homeobox B	GO:0072095 regulation of branch elongation involved in ureteric bud branching;GO:0061296 negative regulation of mesenchymal cell apoptotic process involved in mesonephric nephron morphogenesis;GO:0060681 branch elongation involved in ureteric bud branching		Transcription factors/Helix-turn-helix domains	Nucleoplasm(Supported)		(M106)PID HNF3B PATHWAY		0	1	0	0	0	1	1	1	1	0	0	0	1	0	1	0	0	0	0	0	1
389336	C5orf46	1	0	0	389336	Gene_ID	H. sapiens	389336	H. sapiens	C5orf46	chromosome 5 open reading frame 46	GO:0008150 biological_process			Mitochondria;Nuclear speckles(Approved)				0	0	0	0	0	0	0	0	0	0	0	0	0	0	0	0	0	0	0	0	1
3852	KRT5	1	0	0	3852	Gene_ID	H. sapiens	3852	H. sapiens	KRT5	keratin 5	GO:0031581 hemidesmosome assembly;GO:0070268 cornification;GO:0031424 keratinization			Intermediate filaments(Supported)		(M236)PID DELTA NP63 PATHWAY; (M115)PID REG GR PATHWAY	(M5956)HALLMARK KRAS SIGNALING DN	0	1	0	0	0	0	0	0	0	0	0	0	0	0	0	0	0	0	0	0	1
284266	SIGLEC15	1	0	0	284266	Gene_ID	H. sapiens	284266	H. sapiens	SIGLEC15	sialic acid binding Ig like lectin 15	GO:2001204 regulation of osteoclast development;GO:0036035 osteoclast development;GO:0045670 regulation of osteoclast differentiation			Golgi apparatus(Supported)Nucleoplasm(Approved)				0	0	0	0	0	0	1	0	0	0	0	0	0	0	0	0	0	0	0	0	1
712	C1QA	1	0	0	712	Gene_ID	H. sapiens	712	H. sapiens	C1QA	complement C1q A chain	GO:0048143 astrocyte activation;GO:0150064 vertebrate eye-specific patterning;GO:0150062 complement-mediated synapse pruning			Cytosol;Golgi apparatus(Uncertain)	Cetuximab;Etanercept;Adalimumab;Abciximab;Gemtuzumab ozogamicin;Trastuzumab;Rituximab;Basiliximab;Muromonab;Ibritumomab tiuxetan;Tositumomab;Alemtuzumab;Alefacept;Efalizumab;Natalizumab;Palivizumab;Daclizumab;Bevacizumab	(M5880)NABA ECM AFFILIATED; (M5885)NABA MATRISOME ASSOCIATED; (M5889)NABA MATRISOME	(M5946)HALLMARK COAGULATION; (M5921)HALLMARK COMPLEMENT	1	0	1	0	0	1	0	1	0	0	0	0	0	0	0	0	0	0	0	0	1
3960	LGALS4	1	0	0	3960	Gene_ID	H. sapiens	3960	H. sapiens	LGALS4	galectin 4	GO:0007155 cell adhesion;GO:0022610 biological adhesion;GO:0008150 biological_process			Plasma membrane(Uncertain)		(M5880)NABA ECM AFFILIATED; (M5885)NABA MATRISOME ASSOCIATED; (M5889)NABA MATRISOME		1	0	0	0	0	0	0	0	0	0	0	0	0	0	0	0	0	0	0	0	1
130	ADH6	0	1	0	130	Gene_ID	H. sapiens	130	H. sapiens	ADH6	alcohol dehydrogenase 6 (class V)	GO:0006069 ethanol oxidation;GO:0042573 retinoic acid metabolic process;GO:0042572 retinol metabolic process		Enzymes/ENZYME proteins/Oxidoreductases					0	0	0	0	0	0	0	0	1	0	0	0	0	0	0	1	1	0	0	0	1
4661	MYT1	1	0	0	4661	Gene_ID	H. sapiens	4661	H. sapiens	MYT1	myelin transcription factor 1	GO:0006357 regulation of transcription by RNA polymerase II;GO:0006366 transcription by RNA polymerase II;GO:0007399 nervous system development		Transcription factors/Zinc-coordinating DNA-binding domains	Cytosol;Nucleoplasm(Supported)				0	0	0	0	0	0	0	0	0	0	0	0	0	0	0	0	0	0	0	0	1
79258	MMEL1	1	0	0	79258	Gene_ID	H. sapiens	79258	H. sapiens	MMEL1	membrane metalloendopeptidase like 1	GO:0006508 proteolysis;GO:0019538 protein metabolic process;GO:1901564 organonitrogen compound metabolic process		Enzymes/{ENZYME proteins/Hydrolases,Peptidases/Metallopeptidases}					0	0	0	0	0	0	0	0	0	0	0	0	0	0	0	0	0	0	0	0	1
8685	MARCO	1	0	0	8685	Gene_ID	H. sapiens	8685	H. sapiens	MARCO	macrophage receptor with collagenous structure	GO:0043277 apoptotic cell clearance;GO:0070374 positive regulation of ERK1 and ERK2 cascade;GO:0007193 adenylate cyclase-inhibiting G protein-coupled receptor signaling pathway			Golgi apparatus;Vesicles(Approved)			(M5932)HALLMARK INFLAMMATORY RESPONSE	1	0	0	0	0	0	0	0	0	0	0	0	0	0	0	0	0	0	0	0	1
2980	GUCA2A	0	1	0	2980	Gene_ID	H. sapiens	2980	H. sapiens	GUCA2A	guanylate cyclase activator 2A	GO:0031284 positive regulation of guanylate cyclase activity;GO:0031282 regulation of guanylate cyclase activity;GO:1900373 positive regulation of purine nucleotide biosynthetic process							0	0	0	0	0	0	0	0	0	0	0	0	0	0	0	0	0	0	0	0	1
57758	SCUBE2	1	0	0	57758	Gene_ID	H. sapiens	57758	H. sapiens	SCUBE2	signal peptide, CUB domain and EGF like domain containing 2	GO:0007275 multicellular organism development;GO:0007165 signal transduction;GO:0048856 anatomical structure development					(M5883)NABA SECRETED FACTORS; (M5885)NABA MATRISOME ASSOCIATED; (M5889)NABA MATRISOME	(M5907)HALLMARK ESTROGEN RESPONSE LATE	1	0	0	0	0	0	0	0	0	0	0	0	0	0	0	0	0	0	0	0	1
729408	GAGE2D	0	1	0	729408	Gene_ID	H. sapiens	729408	H. sapiens	GAGE2D	G antigen 2D								0	0	0	0	0	0	0	0	0	0	0	0	0	0	0	0	0	0	0	0	1
56649	TMPRSS4	0	0	1	56649	Gene_ID	H. sapiens	56649	H. sapiens	TMPRSS4	transmembrane serine protease 4	GO:0045967 negative regulation of growth rate;GO:0040009 regulation of growth rate;GO:0045926 negative regulation of growth		Enzymes/Peptidases/Serine-type peptidases	Cytosol;Nucleoplasm(Approved)				0	0	0	0	0	0	0	0	0	0	0	0	0	0	0	0	0	0	0	0	1
284217	LAMA1	0	0	1	284217	Gene_ID	H. sapiens	284217	H. sapiens	LAMA1	laminin subunit alpha 1	GO:0061304 retinal blood vessel morphogenesis;GO:0061299 retina vasculature morphogenesis in camera-type eye;GO:0045198 establishment of epithelial cell apical/basal polarity					(M158)PID INTEGRIN4 PATHWAY; (M33)PID GLYPICAN 1PATHWAY; (M165)PID SYNDECAN 4 PATHWAY	(M5930)HALLMARK EPITHELIAL MESENCHYMAL TRANSITION	0	1	0	1	0	1	0	0	0	0	0	0	1	0	0	0	0	0	0	1	1
4440	MSI1	0	1	0	4440	Gene_ID	H. sapiens	4440	H. sapiens	MSI1	musashi RNA binding protein 1	GO:0007399 nervous system development;GO:0051252 regulation of RNA metabolic process;GO:0019219 regulation of nucleobase-containing compound metabolic process			Cytosol;Nucleoplasm;Vesicles(Approved)				0	0	0	0	0	0	0	0	0	0	0	0	0	0	0	0	0	0	0	0	1
366	AQP9	1	0	0	366	Gene_ID	H. sapiens	366	H. sapiens	AQP9	aquaporin 9	GO:0015722 canalicular bile acid transport;GO:1904823 purine nucleobase transmembrane transport;GO:0071918 urea transmembrane transport						(M5948)HALLMARK BILE ACID METABOLISM; (M5932)HALLMARK INFLAMMATORY RESPONSE; (M5934)HALLMARK XENOBIOTIC METABOLISM	0	0	0	0	0	0	0	0	0	0	0	0	0	0	0	0	0	0	0	0	1
7113	TMPRSS2	1	0	0	7113	Gene_ID	H. sapiens	7113	H. sapiens	TMPRSS2	transmembrane serine protease 2	GO:0046598 positive regulation of viral entry into host cell;GO:0046596 regulation of viral entry into host cell;GO:0046718 viral entry into host cell		Enzymes/Peptidases/Serine-type peptidases	Cell Junctions(Supported)Nucleoplasm(Uncertain)		(M151)PID AR TF PATHWAY; (M58)PID AR PATHWAY	(M5908)HALLMARK ANDROGEN RESPONSE	0	0	0	0	0	0	0	0	0	0	0	0	0	0	0	0	0	0	0	0	1
54769	DIRAS2	0	1	0	54769	Gene_ID	H. sapiens	54769	H. sapiens	DIRAS2	DIRAS family GTPase 2	GO:0043406 positive regulation of MAP kinase activity;GO:0071902 positive regulation of protein serine/threonine kinase activity;GO:0043405 regulation of MAP kinase activity							0	0	0	0	0	0	0	0	0	0	0	0	0	0	0	0	0	0	0	0	1
7045	TGFBI	1	0	0	7045	Gene_ID	H. sapiens	7045	H. sapiens	TGFBI	transforming growth factor beta induced	GO:0002062 chondrocyte differentiation;GO:0007601 visual perception;GO:0001525 angiogenesis					(M169)PID INTEGRIN2 PATHWAY; (M53)PID INTEGRIN3 PATHWAY; (M18)PID INTEGRIN1 PATHWAY	(M5937)HALLMARK GLYCOLYSIS; (M5891)HALLMARK HYPOXIA; (M5915)HALLMARK APICAL JUNCTION	0	0	0	1	0	0	1	0	0	0	0	1	0	0	0	0	0	0	0	1	1
3909	LAMA3	1	0	0	3909	Gene_ID	H. sapiens	3909	H. sapiens	LAMA3	laminin subunit alpha 3	GO:0031581 hemidesmosome assembly;GO:0035987 endodermal cell differentiation;GO:0001706 endoderm formation			Endoplasmic reticulum(Enhanced)		(M158)PID INTEGRIN4 PATHWAY; (M165)PID SYNDECAN 4 PATHWAY; (M240)PID SYNDECAN 2 PATHWAY	(M5915)HALLMARK APICAL JUNCTION; (M5930)HALLMARK EPITHELIAL MESENCHYMAL TRANSITION	0	1	0	1	0	1	0	0	0	0	0	1	0	0	0	0	0	0	0	0	1
56603	CYP26B1	0	0	1	56603	Gene_ID	H. sapiens	56603	H. sapiens	CYP26B1	cytochrome P450 family 26 subfamily B member 1	GO:2001037 positive regulation of tongue muscle cell differentiation;GO:2001035 regulation of tongue muscle cell differentiation;GO:1902811 positive regulation of skeletal muscle fiber differentiation			Cytosol(Approved)			(M5906)HALLMARK ESTROGEN RESPONSE EARLY; (M5907)HALLMARK ESTROGEN RESPONSE LATE	0	1	1	0	0	1	1	1	1	1	0	0	0	0	1	1	1	0	0	0	1
10855	HPSE	1	0	0	10855	Gene_ID	H. sapiens	10855	H. sapiens	HPSE	heparanase	GO:0030200 heparan sulfate proteoglycan catabolic process;GO:0061042 vascular wound healing;GO:0051798 positive regulation of hair follicle development		Enzymes/ENZYME proteins/Hydrolases	Nucleoplasm;Vesicles(Enhanced)		(M198)PID SYNDECAN 1 PATHWAY; (M3468)NABA ECM REGULATORS; (M5885)NABA MATRISOME ASSOCIATED		1	1	0	0	1	0	0	0	0	0	0	0	0	0	0	0	0	0	0	1	1
10288	LILRB2	1	0	0	10288	Gene_ID	H. sapiens	10288	H. sapiens	LILRB2	leukocyte immunoglobulin like receptor B2	GO:1905875 negative regulation of postsynaptic density organization;GO:1900454 positive regulation of long-term synaptic depression;GO:0002774 Fc receptor mediated inhibitory signaling pathway		CD markers					0	0	1	0	0	0	0	0	0	0	0	1	0	0	0	0	0	0	0	0	1
3575	IL7R	1	0	0	3575	Gene_ID	H. sapiens	3575	H. sapiens	IL7R	interleukin 7 receptor	GO:0001915 negative regulation of T cell mediated cytotoxicity;GO:0033089 positive regulation of T cell differentiation in thymus;GO:0070233 negative regulation of T cell apoptotic process		CD markers	Plasma membrane(Supported)Microtubule organizing center(Uncertain)			(M5932)HALLMARK INFLAMMATORY RESPONSE; (M5953)HALLMARK KRAS SIGNALING UP; (M5890)HALLMARK TNFA SIGNALING VIA NFKB	1	0	0	0	0	0	0	0	0	0	0	1	0	0	0	0	0	1	0	0	1
6357	CCL13	1	0	0	6357	Gene_ID	H. sapiens	6357	H. sapiens	CCL13	C-C motif chemokine ligand 13	GO:0048245 eosinophil chemotaxis;GO:0072677 eosinophil migration;GO:0030593 neutrophil chemotaxis					(M19043)ST ADRENERGIC; (M5883)NABA SECRETED FACTORS; (M5885)NABA MATRISOME ASSOCIATED	(M5950)HALLMARK ALLOGRAFT REJECTION	1	0	1	0	0	0	0	0	0	0	0	0	0	0	0	0	0	1	0	0	1
2626	GATA4	0	1	0	2626	Gene_ID	H. sapiens	2626	H. sapiens	GATA4	GATA binding protein 4	GO:0003290 atrial septum secundum morphogenesis;GO:0003289 atrial septum primum morphogenesis;GO:0003285 septum secundum development		Transcription factors/Zinc-coordinating DNA-binding domains	Nuclear bodies(Supported)		(M288)PID HES HEY PATHWAY		0	1	0	0	0	1	0	1	0	0	0	0	1	0	0	0	0	0	0	1	1
401089	C3orf72	0	1	0	401089	Gene_ID	H. sapiens	401089	H. sapiens	FOXL2NB	FOXL2 neighbor				Nucleoli fibrillar center(Supported)				0	0	0	0	0	0	0	0	0	0	0	0	0	0	0	0	0	0	0	0	1
1045	CDX2	0	1	0	1045	Gene_ID	H. sapiens	1045	H. sapiens	CDX2	caudal type homeobox 2	GO:0001829 trophectodermal cell differentiation;GO:0014807 regulation of somitogenesis;GO:0001825 blastocyst formation		Transcription factors/Helix-turn-helix domains	Nucleoplasm(Supported)				0	1	0	0	0	0	1	1	0	0	0	0	0	0	0	0	0	0	0	1	1
3671	ISLR	1	0	0	3671	Gene_ID	H. sapiens	3671	H. sapiens	ISLR	immunoglobulin superfamily containing leucine rich repeat	GO:0002576 platelet degranulation;GO:0045055 regulated exocytosis;GO:0006887 exocytosis			Golgi apparatus;Plasma membrane(Approved)				0	0	0	0	0	0	0	0	0	0	0	0	0	0	0	0	0	0	0	0	1
1917	EEF1A2	1	0	0	1917	Gene_ID	H. sapiens	1917	H. sapiens	EEF1A2	eukaryotic translation elongation factor 1 alpha 2	GO:1904714 regulation of chaperone-mediated autophagy;GO:0090218 positive regulation of lipid kinase activity;GO:0061684 chaperone-mediated autophagy			Cytosol;Nucleoli(Enhanced)				0	0	0	0	0	0	0	0	0	0	0	0	0	0	0	0	0	0	0	0	1
8601	RGS20	1	0	0	8601	Gene_ID	H. sapiens	8601	H. sapiens	RGS20	regulator of G protein signaling 20	GO:0008277 regulation of G protein-coupled receptor signaling pathway;GO:0043547 positive regulation of GTPase activity;GO:0043087 regulation of GTPase activity					(M18342)ST G ALPHA I PATHWAY		1	0	0	0	0	0	0	0	0	0	0	0	0	0	0	0	0	0	0	0	1
644844	PHGR1	1	0	0	644844	Gene_ID	H. sapiens	644844	H. sapiens	PHGR1	proline, histidine and glycine rich 1				Vesicles(Approved)				0	0	0	0	0	0	0	0	0	0	0	0	0	0	0	0	0	0	0	0	1
8839	WISP2	0	1	0	8839	Gene_ID	H. sapiens	8839	H. sapiens	CCN5	cellular communication network factor 5	GO:0060548 negative regulation of cell death;GO:0007155 cell adhesion;GO:0022610 biological adhesion					(M3008)NABA ECM GLYCOPROTEINS; (M5884)NABA CORE MATRISOME; (M5889)NABA MATRISOME	(M5906)HALLMARK ESTROGEN RESPONSE EARLY; (M5891)HALLMARK HYPOXIA; (M5907)HALLMARK ESTROGEN RESPONSE LATE	0	0	0	1	0	0	0	0	0	0	0	0	0	0	0	0	0	0	0	0	1
28234	SLCO1B3	0	0	1	28234	Gene_ID	H. sapiens	28234	H. sapiens	SLCO1B3	solute carrier organic anion transporter family member 1B3	GO:0015721 bile acid and bile salt transport;GO:0043252 sodium-independent organic anion transport;GO:0015718 monocarboxylic acid transport		Transporters/Electrochemical Potential-driven transporters	Plasma membrane(Supported)	Rifampicin (Sodium-independent organic anion transmembrane transporter activity);Clarithromycin (Sodium-independent organic anion transmembrane transporter activity)			0	0	0	0	0	0	0	0	0	0	0	0	0	0	0	0	0	0	0	0	1
6359	CCL15	1	0	0	6359	Gene_ID	H. sapiens	6359	H. sapiens	CCL15	C-C motif chemokine ligand 15	GO:0048245 eosinophil chemotaxis;GO:0072677 eosinophil migration;GO:0030593 neutrophil chemotaxis			Golgi apparatus;Vesicles(Approved)		(M19043)ST ADRENERGIC; (M5883)NABA SECRETED FACTORS; (M5885)NABA MATRISOME ASSOCIATED		1	0	0	0	0	0	0	0	0	0	0	0	0	0	0	0	0	1	0	0	1
85449	KIAA1755	1	0	0	85449	Gene_ID	H. sapiens	85449	H. sapiens	KIAA1755	KIAA1755				Golgi apparatus;Nucleoli;Vesicles(Approved)				0	0	0	0	0	0	0	0	0	0	0	0	0	0	0	0	0	0	0	0	1
1301	COL11A1	1	0	0	1301	Gene_ID	H. sapiens	1301	H. sapiens	COL11A1	collagen type XI alpha 1 chain	GO:0050910 detection of mechanical stimulus involved in sensory perception of sound;GO:0055010 ventricular cardiac muscle tissue morphogenesis;GO:0035989 tendon development			Endoplasmic reticulum(Approved)		(M3005)NABA COLLAGENS; (M198)PID SYNDECAN 1 PATHWAY; (M18)PID INTEGRIN1 PATHWAY	(M5942)HALLMARK UV RESPONSE DN; (M5930)HALLMARK EPITHELIAL MESENCHYMAL TRANSITION	0	0	0	1	0	1	1	0	0	0	0	0	0	0	0	0	0	0	0	0	1
3002	GZMB	1	0	0	3002	Gene_ID	H. sapiens	3002	H. sapiens	GZMB	granzyme B	GO:1900740 positive regulation of protein insertion into mitochondrial membrane involved in apoptotic signaling pathway;GO:1900739 regulation of protein insertion into mitochondrial membrane involved in apoptotic signaling pathway;GO:1901030 positive regulation of mitochondrial outer membrane permeabilization involved in apoptotic signaling pathway		Enzymes/{ENZYME proteins/Hydrolases,Peptidases/Serine-type peptidases}			(M7997)SA CASPASE CASCADE; (M220)PID CASPASE PATHWAY; (M54)PID IL12 2PATHWAY	(M5921)HALLMARK COMPLEMENT; (M5950)HALLMARK ALLOGRAFT REJECTION	0	0	0	0	0	0	0	0	0	0	0	0	0	0	0	0	0	0	0	0	1
7545	ZIC1	0	1	0	7545	Gene_ID	H. sapiens	7545	H. sapiens	ZIC1	Zic family member 1	GO:0042307 positive regulation of protein import into nucleus;GO:1904591 positive regulation of protein import;GO:0042306 regulation of protein import into nucleus		Transcription factors/Zinc-coordinating DNA-binding domains	Nucleoplasm(Supported)				0	0	0	0	0	1	0	1	0	0	0	0	0	0	0	0	0	0	0	0	1
50805	IRX4	0	1	0	50805	Gene_ID	H. sapiens	50805	H. sapiens	IRX4	iroquois homeobox 4	GO:0048561 establishment of animal organ orientation;GO:0048560 establishment of anatomical structure orientation;GO:0009798 axis specification		Transcription factors/Helix-turn-helix domains	Nucleus;Vesicles(Uncertain)				0	0	0	0	0	0	0	1	0	0	0	0	0	0	0	0	0	0	0	0	1
6703	SPRR2D	1	0	0	6703	Gene_ID	H. sapiens	6703	H. sapiens	SPRR2D	small proline rich protein 2D	GO:0070268 cornification;GO:0031424 keratinization;GO:0030216 keratinocyte differentiation							0	1	0	0	0	0	0	0	0	0	0	0	0	0	0	0	0	0	0	0	1
3229	HOXC13	0	1	0	3229	Gene_ID	H. sapiens	3229	H. sapiens	HOXC13	homeobox C13	GO:0043587 tongue morphogenesis;GO:0035878 nail development;GO:0043586 tongue development		Transcription factors/Helix-turn-helix domains					0	1	0	0	0	1	0	1	0	1	0	0	0	0	0	0	0	0	0	0	1
283392	LOC283392	1	0	0	283392	Gene_ID	H. sapiens	283392	H. sapiens	TRHDE-AS1	TRHDE antisense RNA 1								0	0	0	0	0	0	0	0	0	0	0	0	0	0	0	0	0	0	0	0	1
81706	PPP1R14C	0	0	1	81706	Gene_ID	H. sapiens	81706	H. sapiens	PPP1R14C	protein phosphatase 1 regulatory inhibitor subunit 14C	GO:0032515 negative regulation of phosphoprotein phosphatase activity;GO:0035308 negative regulation of protein dephosphorylation;GO:0010923 negative regulation of phosphatase activity					(M71)PID ILK PATHWAY		0	0	0	0	1	0	0	0	0	0	0	0	0	0	0	0	0	0	0	0	1
117154	DACH2	0	0	1	117154	Gene_ID	H. sapiens	117154	H. sapiens	DACH2	dachshund family transcription factor 2	GO:0046545 development of primary female sexual characteristics;GO:0046660 female sex differentiation;GO:0045137 development of primary sexual characteristics							0	0	0	0	0	0	0	0	0	1	0	0	0	0	0	0	0	0	0	0	1
3101	HK3	1	0	0	3101	Gene_ID	H. sapiens	3101	H. sapiens	HK3	hexokinase 3	GO:0061621 canonical glycolysis;GO:0061620 glycolytic process through glucose-6-phosphate;GO:0061615 glycolytic process through fructose-6-phosphate		Enzymes/ENZYME proteins/Transferases					0	0	0	0	0	0	0	0	0	0	0	0	0	0	0	0	0	0	0	0	1
3248	HPGD	1	0	0	3248	Gene_ID	H. sapiens	3248	H. sapiens	HPGD	15-hydroxyprostaglandin dehydrogenase	GO:2001301 lipoxin biosynthetic process;GO:0097070 ductus arteriosus closure;GO:2001300 lipoxin metabolic process		Enzymes/ENZYME proteins/Oxidoreductases	Cytosol(Supported)Nucleoplasm(Approved)	NADH (Protein homodimerization activity)		(M5908)HALLMARK ANDROGEN RESPONSE; (M5935)HALLMARK FATTY ACID METABOLISM	0	0	1	0	0	0	0	0	0	0	0	0	0	0	1	1	0	0	0	1	1
140893	C20orf151	1	0	0	140893	Gene_ID	H. sapiens	140893	H. sapiens	RBBP8NL	RBBP8 N-terminal like								0	0	0	0	0	0	0	0	0	0	0	0	0	0	0	0	0	0	0	0	1
79937	CNTNAP3	0	0	1	79937	Gene_ID	H. sapiens	79937	H. sapiens	CNTNAP3	contactin associated protein family member 3	GO:0008037 cell recognition;GO:0007155 cell adhesion;GO:0022610 biological adhesion							0	0	0	0	0	0	0	0	0	0	0	0	0	0	0	0	0	0	0	0	1
79849	PDZD3	0	1	0	79849	Gene_ID	H. sapiens	79849	H. sapiens	PDZD3	PDZ domain containing 3	GO:0031283 negative regulation of guanylate cyclase activity;GO:0031282 regulation of guanylate cyclase activity;GO:0010754 negative regulation of cGMP-mediated signaling						(M5915)HALLMARK APICAL JUNCTION	0	0	0	0	0	0	0	0	0	0	0	0	0	0	0	0	0	0	0	0	1
115908	CTHRC1	1	0	0	115908	Gene_ID	H. sapiens	115908	H. sapiens	CTHRC1	collagen triple helix repeat containing 1	GO:0090177 establishment of planar polarity involved in neural tube closure;GO:0043932 ossification involved in bone remodeling;GO:0060122 inner ear receptor cell stereocilium organization			Nucleoplasm(Approved)		(M77)PID WNT SIGNALING PATHWAY; (M23)PID WNT NONCANONICAL PATHWAY; (M3008)NABA ECM GLYCOPROTEINS	(M5930)HALLMARK EPITHELIAL MESENCHYMAL TRANSITION	0	0	0	1	0	1	1	0	0	0	0	0	0	0	0	0	0	0	0	0	1
9955	HS3ST3A1	0	0	1	9955	Gene_ID	H. sapiens	9955	H. sapiens	HS3ST3A1	heparan sulfate-glucosamine 3-sulfotransferase 3A1	GO:0006024 glycosaminoglycan biosynthetic process;GO:0006023 aminoglycan biosynthetic process;GO:0030203 glycosaminoglycan metabolic process		Enzymes/ENZYME proteins/Transferases	Microtubules(Approved)	Adenosine-3'-5'-Diphosphate (Sulfotransferase activity);O2-Sulfo-Glucuronic Acid (Sulfotransferase activity);N,O6-Disulfo-Glucosamine (Sulfotransferase activity);1,4-Dideoxy-5-Dehydro-O2-Sulfo-Glucuronic Acid (Sulfotransferase activity);Citric Acid (Sulfotransferase activity)			0	0	0	0	0	0	0	0	0	0	0	0	0	0	0	0	0	0	0	0	1
27065	D4S234E	1	0	0	27065	Gene_ID	H. sapiens	27065	H. sapiens	NSG1	neuronal vesicle trafficking associated 1	GO:0099630 postsynaptic neurotransmitter receptor cycle;GO:0099627 neurotransmitter receptor cycle;GO:0098887 neurotransmitter receptor transport, endosome to postsynaptic membrane			Mitochondria(Approved)		(M19)PID P73PATHWAY		0	0	0	0	0	0	0	0	0	0	0	0	0	0	0	0	0	0	0	0	1
10840	ALDH1L1	0	0	1	10840	Gene_ID	H. sapiens	10840	H. sapiens	ALDH1L1	aldehyde dehydrogenase 1 family member L1	GO:0009258 10-formyltetrahydrofolate catabolic process;GO:0009397 folic acid-containing compound catabolic process;GO:0009256 10-formyltetrahydrofolate metabolic process		Enzymes/ENZYME proteins/Oxidoreductases	Cytosol(Enhanced)	Tetrahydrofolic acid (Methyltransferase activity)		(M5945)HALLMARK HEME METABOLISM	0	0	0	0	0	0	0	0	0	0	0	0	0	0	0	0	0	0	0	0	1
6623	SNCG	0	0	1	6623	Gene_ID	H. sapiens	6623	H. sapiens	SNCG	synuclein gamma	GO:0014059 regulation of dopamine secretion;GO:0014046 dopamine secretion;GO:0050433 regulation of catecholamine secretion						(M5905)HALLMARK ADIPOGENESIS	0	0	0	0	0	0	0	0	1	0	0	0	0	0	0	0	0	0	0	0	1
203569	PAGE2	0	1	0	203569	Gene_ID	H. sapiens	203569	H. sapiens	PAGE2	PAGE family member 2								0	0	0	0	0	0	0	0	0	0	0	0	0	0	0	0	0	0	0	0	1
139728	PNCK	1	0	0	139728	Gene_ID	H. sapiens	139728	H. sapiens	PNCK	pregnancy up-regulated nonubiquitous CaM kinase	GO:0006468 protein phosphorylation;GO:0016310 phosphorylation;GO:0006796 phosphate-containing compound metabolic process	CAMK Ser/Thr protein kinase family	Enzymes/{ENZYME proteins/Transferases,Kinases/CAMK Ser/Thr protein kinases}	Cytosol;Golgi apparatus;Plasma membrane(Approved)				0	0	0	0	0	0	0	0	0	0	0	0	0	0	0	0	0	0	0	0	1
547	KIF1A	0	1	0	547	Gene_ID	H. sapiens	547	H. sapiens	KIF1A	kinesin family member 1A	GO:1990049 retrograde neuronal dense core vesicle transport;GO:1990048 anterograde neuronal dense core vesicle transport;GO:0099519 dense core granule cytoskeletal transport			Cytosol;Microtubule organizing center(Approved)	Adenosine-5'-[Beta, Gamma-Methylene]Triphosphate (Motor activity);Phosphoaminophosphonic Acid-Adenylate Ester (Motor activity)			0	0	0	0	0	0	0	0	0	0	0	0	0	0	0	0	0	0	0	0	1
354	KLK3	0	1	0	354	Gene_ID	H. sapiens	354	H. sapiens	KLK3	kallikrein related peptidase 3	GO:0002778 antibacterial peptide production;GO:0002775 antimicrobial peptide production;GO:0016525 negative regulation of angiogenesis		Enzymes/{ENZYME proteins/Hydrolases,Peptidases/Serine-type peptidases}			(M285)PID HNF3A PATHWAY; (M151)PID AR TF PATHWAY; (M58)PID AR PATHWAY	(M5908)HALLMARK ANDROGEN RESPONSE	0	0	1	0	0	0	0	0	0	0	0	0	0	0	0	0	0	0	0	1	1
105375355	UPK3B	0	0	1	105375355	Gene_ID	H. sapiens	105375355	H. sapiens	UPK3B	uroplakin 3B	GO:0010629 negative regulation of gene expression;GO:0010605 negative regulation of macromolecule metabolic process;GO:0009892 negative regulation of metabolic process		Transporters/Accessory Factors Involved in Transport	Cytosol;Nucleus;Vesicles(Approved)				0	0	0	0	0	0	0	0	0	0	0	0	0	0	0	0	0	0	0	0	1
4105	MAGEA6	0	0	1	4105	Gene_ID	H. sapiens	4105	H. sapiens	MAGEA6	MAGE family member A6	GO:0008150 biological_process							0	0	0	0	0	0	0	0	0	0	0	0	0	0	0	0	0	0	0	0	1
136227	EMID2	0	1	0	136227	Gene_ID	H. sapiens	136227	H. sapiens	COL26A1	collagen type XXVI alpha 1 chain	GO:0010811 positive regulation of cell-substrate adhesion;GO:0010810 regulation of cell-substrate adhesion;GO:0045785 positive regulation of cell adhesion			Vesicles(Approved)		(M3005)NABA COLLAGENS; (M5884)NABA CORE MATRISOME; (M5889)NABA MATRISOME		0	0	0	1	0	0	0	0	0	0	0	0	0	0	0	0	0	0	0	0	1
8728	ADAM19	1	0	0	8728	Gene_ID	H. sapiens	8728	H. sapiens	ADAM19	ADAM metallopeptidase domain 19	GO:2000049 positive regulation of cell-cell adhesion mediated by cadherin;GO:2000047 regulation of cell-cell adhesion mediated by cadherin;GO:0044331 cell-cell adhesion mediated by cadherin			Vesicles(Approved)		(M3468)NABA ECM REGULATORS; (M5885)NABA MATRISOME ASSOCIATED; (M5889)NABA MATRISOME	(M5947)HALLMARK IL2 STAT5 SIGNALING	1	0	0	1	1	0	0	0	0	0	0	1	0	0	0	0	0	0	0	0	1
3569	IL6	1	0	0	3569	Gene_ID	H. sapiens	3569	H. sapiens	IL6	interleukin 6	GO:0072540 T-helper 17 cell lineage commitment;GO:0002295 T-helper cell lineage commitment;GO:2000553 positive regulation of T-helper 2 cell cytokine production			Vesicles(Approved)	Ginseng (Interleukin-6 receptor binding);YSIL6 (Interleukin-6 receptor binding);AV411 (Interleukin-6 receptor binding);681323 (Interleukin-6 receptor binding);VX-702 (Interleukin-6 receptor binding);CRx-139 (Interleukin-6 receptor binding);HMPL-004 (Interleukin-6 receptor binding);Siltuximab (Interleukin-6 receptor binding)	(M9174)ST STAT3 PATHWAY; (M36)PID IL27 PATHWAY; (M65)PID FRA PATHWAY	(M5897)HALLMARK IL6 JAK STAT3 SIGNALING; (M5941)HALLMARK UV RESPONSE UP; (M5902)HALLMARK APOPTOSIS	1	0	1	1	0	0	0	0	1	0	0	1	0	1	0	0	0	1	0	1	1
91614	DEPDC7	0	0	1	91614	Gene_ID	H. sapiens	91614	H. sapiens	DEPDC7	DEP domain containing 7	GO:0051056 regulation of small GTPase mediated signal transduction;GO:0007264 small GTPase mediated signal transduction;GO:1902531 regulation of intracellular signal transduction			Cytosol;Nucleoli;Nucleus(Approved)				0	0	0	0	0	0	0	0	0	0	0	0	0	0	0	0	0	0	0	0	1
64072	CDH23	1	0	0	64072	Gene_ID	H. sapiens	64072	H. sapiens	CDH23	cadherin related 23	GO:0060122 inner ear receptor cell stereocilium organization;GO:0050957 equilibrioception;GO:0060119 inner ear receptor cell development							1	0	0	0	0	1	0	0	0	0	0	0	0	0	0	0	0	0	0	0	1
30835	CD209	1	0	0	30835	Gene_ID	H. sapiens	30835	H. sapiens	CD209	CD209 molecule	GO:0097323 B cell adhesion;GO:0046968 peptide antigen transport;GO:0019062 virion attachment to host cell		CD markers			(M5880)NABA ECM AFFILIATED; (M5885)NABA MATRISOME ASSOCIATED; (M5889)NABA MATRISOME	(M5915)HALLMARK APICAL JUNCTION	1	0	0	0	0	0	0	0	0	0	0	1	0	0	0	0	0	0	0	0	1
146279	TEKT5	1	0	0	146279	Gene_ID	H. sapiens	146279	H. sapiens	TEKT5	tektin 5	GO:0060294 cilium movement involved in cell motility;GO:0060285 cilium-dependent cell motility;GO:0001539 cilium or flagellum-dependent cell motility			Actin filaments(Supported)				0	0	0	0	0	0	0	0	0	0	0	0	0	0	0	0	0	0	0	0	1
2209	FCGR1A	1	0	0	2209	Gene_ID	H. sapiens	2209	H. sapiens	FCGR1A	Fc fragment of IgG receptor Ia	GO:0002479 antigen processing and presentation of exogenous peptide antigen via MHC class I, TAP-dependent;GO:0038096 Fc-gamma receptor signaling pathway involved in phagocytosis;GO:0061098 positive regulation of protein tyrosine kinase activity		CD markers		Cetuximab (Receptor signaling protein activity);Etanercept (Receptor signaling protein activity);Immune Globulin Human (Receptor signaling protein activity);Adalimumab (Receptor signaling protein activity);Abciximab (Receptor signaling protein activity);Gemtuzumab ozogamicin (Receptor signaling protein activity);Trastuzumab (Receptor signaling protein activity);Rituximab (Receptor signaling prote…		(M5913)HALLMARK INTERFERON GAMMA RESPONSE	1	0	0	0	0	0	0	0	0	0	0	0	0	0	0	0	0	1	0	0	1
1440	CSF3	1	0	0	1440	Gene_ID	H. sapiens	1440	H. sapiens	CSF3	colony stimulating factor 3	GO:2000251 positive regulation of actin cytoskeleton reorganization;GO:0030851 granulocyte differentiation;GO:0014068 positive regulation of phosphatidylinositol 3-kinase signaling					(M5883)NABA SECRETED FACTORS; (M5885)NABA MATRISOME ASSOCIATED; (M5889)NABA MATRISOME	(M5932)HALLMARK INFLAMMATORY RESPONSE	1	0	1	0	0	0	0	0	0	0	0	0	0	0	0	0	0	1	0	0	1
283455	KSR2	1	0	0	283455	Gene_ID	H. sapiens	283455	H. sapiens	KSR2	kinase suppressor of ras 2	GO:0120162 positive regulation of cold-induced thermogenesis;GO:0120161 regulation of cold-induced thermogenesis;GO:0106106 cold-induced thermogenesis	TKL Ser/Thr protein kinase family	Enzymes/{ENZYME proteins/Transferases,Kinases/TKL Ser/Thr protein kinases};RAS pathway related proteins					0	0	0	0	0	0	0	0	0	0	0	0	0	0	0	0	0	0	0	0	1
3221	HOXC4	0	1	0	3221	Gene_ID	H. sapiens	3221	H. sapiens	HOXC4	homeobox C4	GO:0048704 embryonic skeletal system morphogenesis;GO:0048706 embryonic skeletal system development;GO:0051216 cartilage development		Transcription factors/Helix-turn-helix domains	Nucleus(Supported)				0	0	0	0	0	1	1	1	0	0	0	0	0	0	0	0	0	0	0	0	1
1747	DLX3	0	1	0	1747	Gene_ID	H. sapiens	1747	H. sapiens	DLX3	distal-less homeobox 3	GO:0071895 odontoblast differentiation;GO:0060563 neuroepithelial cell differentiation;GO:0042475 odontogenesis of dentin-containing tooth		Transcription factors/Helix-turn-helix domains					0	1	0	0	0	0	0	0	0	0	0	0	0	0	0	0	0	0	0	1	1
338324	S100A7A	1	0	0	338324	Gene_ID	H. sapiens	338324	H. sapiens	S100A7A	S100 calcium binding protein A7A						(M5883)NABA SECRETED FACTORS; (M5885)NABA MATRISOME ASSOCIATED; (M5889)NABA MATRISOME		1	0	0	0	0	0	0	0	0	0	1	0	0	0	0	0	0	0	0	0	1
440503	PLIN5	1	0	0	440503	Gene_ID	H. sapiens	440503	H. sapiens	PLIN5	perilipin 5	GO:0010897 negative regulation of triglyceride catabolic process;GO:0031999 negative regulation of fatty acid beta-oxidation;GO:0032000 positive regulation of fatty acid beta-oxidation							0	0	0	0	1	0	0	0	0	0	0	0	0	0	0	0	0	0	0	0	1
153478	PLEKHG4B	0	0	1	153478	Gene_ID	H. sapiens	153478	H. sapiens	PLEKHG4B	pleckstrin homology and RhoGEF domain containing G4B				Nucleoplasm(Approved)				0	0	0	0	0	0	0	0	0	0	0	0	0	0	0	0	0	0	0	0	1
10267	RAMP1	1	0	0	10267	Gene_ID	H. sapiens	10267	H. sapiens	RAMP1	receptor activity modifying protein 1	GO:0060050 positive regulation of protein glycosylation;GO:1990408 calcitonin gene-related peptide receptor signaling pathway;GO:0097647 amylin receptor signaling pathway			Nuclear membrane(Supported)Nucleoplasm(Approved)	Pramlintide (Receptor activity)			1	0	0	0	0	0	0	0	0	0	0	0	0	0	0	0	0	0	0	1	1
85452	KIAA1751	0	1	0	85452	Gene_ID	H. sapiens	85452	H. sapiens	CFAP74	cilia and flagella associated protein 74	GO:0035082 axoneme assembly;GO:0001578 microtubule bundle formation;GO:0060271 cilium assembly							0	0	0	0	0	0	0	0	0	0	0	0	0	0	0	0	0	0	0	0	1
2020	EN2	0	1	0	2020	Gene_ID	H. sapiens	2020	H. sapiens	EN2	engrailed homeobox 2	GO:1990403 embryonic brain development;GO:0030901 midbrain development;GO:0043524 negative regulation of neuron apoptotic process		Transcription factors/Helix-turn-helix domains	Nucleus(Supported)Nucleoli fibrillar center(Approved)	N-Cyclohexyltaurine (Sequence-specific dna binding)			0	0	0	0	0	0	0	1	0	0	0	0	0	0	0	0	0	0	0	0	1
7179	TPTE	0	1	0	7179	Gene_ID	H. sapiens	7179	H. sapiens	TPTE	transmembrane phosphatase with tensin homology	GO:0035335 peptidyl-tyrosine dephosphorylation;GO:0006470 protein dephosphorylation;GO:0016311 dephosphorylation		Enzymes/ENZYME proteins/Hydrolases	Cytosol;Endoplasmic reticulum(Approved)				0	0	0	0	0	0	0	0	0	0	0	0	0	0	0	0	0	0	0	0	1
7490	WT1	0	0	1	7490	Gene_ID	H. sapiens	7490	H. sapiens	WT1	WT1 transcription factor	GO:0072302 negative regulation of metanephric glomerular mesangial cell proliferation;GO:0072301 regulation of metanephric glomerular mesangial cell proliferation;GO:2001076 positive regulation of metanephric ureteric bud development		Transcription factors/Zinc-coordinating DNA-binding domains	Nucleoplasm(Supported)		(M105)PID TELOMERASE PATHWAY; (M19)PID P73PATHWAY		0	1	0	1	0	1	0	1	0	1	0	0	1	0	1	0	0	0	0	1	1
10874	NMU	0	1	0	10874	Gene_ID	H. sapiens	10874	H. sapiens	NMU	neuromedin U	GO:0120069 positive regulation of stomach fundus smooth muscle contraction;GO:0120068 regulation of stomach fundus smooth muscle contraction;GO:0014825 stomach fundus smooth muscle contraction						(M5907)HALLMARK ESTROGEN RESPONSE LATE	1	0	0	0	0	0	0	0	1	0	0	0	0	0	0	0	0	0	0	0	1
84290	CAPNS2	0	0	1	84290	Gene_ID	H. sapiens	84290	H. sapiens	CAPNS2	calpain small subunit 2	GO:0022617 extracellular matrix disassembly;GO:0030198 extracellular matrix organization;GO:0043062 extracellular structure organization			Cytosol(Approved)				0	0	0	1	0	0	0	0	0	0	0	0	0	1	0	0	0	0	0	0	1
956	ENTPD3	1	0	0	956	Gene_ID	H. sapiens	956	H. sapiens	ENTPD3	ectonucleoside triphosphate diphosphohydrolase 3	GO:0009134 nucleoside diphosphate catabolic process;GO:0009143 nucleoside triphosphate catabolic process;GO:0034656 nucleobase-containing small molecule catabolic process		Enzymes/ENZYME proteins/Hydrolases	Cytosol(Approved)				0	0	0	0	0	0	0	0	0	0	0	0	0	0	0	0	0	0	0	0	1
9982	FGFBP1	1	0	0	9982	Gene_ID	H. sapiens	9982	H. sapiens	FGFBP1	fibroblast growth factor binding protein 1	GO:1903589 positive regulation of blood vessel endothelial cell proliferation involved in sprouting angiogenesis;GO:0090050 positive regulation of cell migration involved in sprouting angiogenesis;GO:1903587 regulation of blood vessel endothelial cell proliferation involved in sprouting angiogenesis					(M5883)NABA SECRETED FACTORS; (M5885)NABA MATRISOME ASSOCIATED; (M5889)NABA MATRISOME		1	0	0	0	0	0	0	0	0	0	0	1	0	0	0	0	0	0	0	1	1
727936	GXYLT2	1	0	0	727936	Gene_ID	H. sapiens	727936	H. sapiens	GXYLT2	glucoside xylosyltransferase 2	GO:0016266 O-glycan processing;GO:0006493 protein O-linked glycosylation;GO:0006486 protein glycosylation		Enzymes/ENZYME proteins/Transferases	Cytokinetic bridge;Midbody ring;Nucleoplasm(Approved)				0	0	0	0	0	0	0	0	0	0	0	0	0	0	0	0	0	0	0	0	1
57402	S100A14	0	1	0	57402	Gene_ID	H. sapiens	57402	H. sapiens	S100A14	S100 calcium binding protein A14	GO:0034142 toll-like receptor 4 signaling pathway;GO:0071624 positive regulation of granulocyte chemotaxis;GO:0090026 positive regulation of monocyte chemotaxis			Cytosol;Plasma membrane(Supported)Cell Junctions;Nuclear bodies(Approved)		(M5883)NABA SECRETED FACTORS; (M5885)NABA MATRISOME ASSOCIATED; (M5889)NABA MATRISOME		0	0	1	0	0	0	0	0	0	0	0	0	0	0	0	0	0	0	0	0	1
196051	PPAPDC1A	1	0	0	196051	Gene_ID	H. sapiens	196051	H. sapiens	PLPP4	phospholipid phosphatase 4	GO:0038096 Fc-gamma receptor signaling pathway involved in phagocytosis;GO:0090279 regulation of calcium ion import;GO:0001835 blastocyst hatching		Enzymes/ENZYME proteins/Hydrolases	Nucleoli;Nucleus(Approved)				0	0	0	0	0	0	1	0	0	0	0	0	0	0	0	0	0	0	0	0	1
9447	AIM2	0	1	0	9447	Gene_ID	H. sapiens	9447	H. sapiens	AIM2	absent in melanoma 2	GO:0050718 positive regulation of interleukin-1 beta secretion;GO:1904270 pyroptosome complex assembly;GO:0050716 positive regulation of interleukin-1 secretion			Cytosol;Mitochondria;Nucleoplasm(Supported)				0	0	0	0	1	0	0	0	1	0	0	0	0	0	0	0	0	0	0	0	1
525	ATP6V1B1	0	1	0	525	Gene_ID	H. sapiens	525	H. sapiens	ATP6V1B1	ATPase H+ transporting V1 subunit B1	GO:0090383 phagosome acidification;GO:0033572 transferrin transport;GO:0051452 intracellular pH reduction			Nuclear membrane;Nucleus(Approved)			(M5910)HALLMARK PROTEIN SECRETION; (M5956)HALLMARK KRAS SIGNALING DN	0	0	0	0	0	1	0	1	0	0	0	0	0	0	0	0	0	1	0	0	1
116211	TM4SF19	1	0	0	116211	Gene_ID	H. sapiens	116211	H. sapiens	TM4SF19	transmembrane 4 L six family member 19			Transporters/Accessory Factors Involved in Transport					0	0	0	0	0	0	0	0	0	0	0	0	0	0	0	0	0	0	0	0	1
6590	SLPI	0	1	0	6590	Gene_ID	H. sapiens	6590	H. sapiens	SLPI	secretory leukocyte peptidase inhibitor	GO:0045071 negative regulation of viral genome replication;GO:1903901 negative regulation of viral life cycle;GO:0045069 regulation of viral genome replication					(M3468)NABA ECM REGULATORS; (M5885)NABA MATRISOME ASSOCIATED; (M5889)NABA MATRISOME	(M5953)HALLMARK KRAS SIGNALING UP	0	0	1	0	1	0	0	0	0	0	0	0	0	0	0	0	0	0	0	0	1
57556	SEMA6A	1	0	0	57556	Gene_ID	H. sapiens	57556	H. sapiens	SEMA6A	semaphorin 6A	GO:0106089 negative regulation of cell adhesion involved in sprouting angiogenesis;GO:0106088 regulation of cell adhesion involved in sprouting angiogenesis;GO:0120078 cell adhesion involved in sprouting angiogenesis			Nucleus(Supported)Intermediate filaments(Approved)		(M5880)NABA ECM AFFILIATED; (M5885)NABA MATRISOME ASSOCIATED; (M5889)NABA MATRISOME		1	0	0	0	0	0	0	0	0	0	0	1	0	0	0	0	0	0	0	1	1
713	C1QB	1	0	0	713	Gene_ID	H. sapiens	713	H. sapiens	C1QB	complement C1q B chain	GO:0006958 complement activation, classical pathway;GO:0030449 regulation of complement activation;GO:0098883 synapse pruning				Cetuximab;Etanercept;Adalimumab;Abciximab;Gemtuzumab ozogamicin;Trastuzumab;Rituximab;Basiliximab;Muromonab;Ibritumomab tiuxetan;Tositumomab;Alemtuzumab;Alefacept;Efalizumab;Natalizumab;Palivizumab;Daclizumab;Bevacizumab	(M5880)NABA ECM AFFILIATED; (M5885)NABA MATRISOME ASSOCIATED; (M5889)NABA MATRISOME		1	0	1	0	0	1	0	0	0	0	0	0	0	0	0	0	0	0	0	0	1
12	SERPINA3	1	0	0	12	Gene_ID	H. sapiens	12	H. sapiens	SERPINA3	serpin family A member 3	GO:0030277 maintenance of gastrointestinal epithelium;GO:0002576 platelet degranulation;GO:0043312 neutrophil degranulation					(M3468)NABA ECM REGULATORS; (M5885)NABA MATRISOME ASSOCIATED; (M5889)NABA MATRISOME	(M5953)HALLMARK KRAS SIGNALING UP; (M5907)HALLMARK ESTROGEN RESPONSE LATE	1	0	0	0	1	0	0	0	0	0	0	0	0	0	0	0	0	0	0	0	1
2825	GPR1	1	0	0	2825	Gene_ID	H. sapiens	2825	H. sapiens	GPR1	G protein-coupled receptor 1	GO:0007218 neuropeptide signaling pathway;GO:0007186 G protein-coupled receptor signaling pathway;GO:0007165 signal transduction		G-protein coupled receptors/GPCRs excl olfactory receptors	Plasma membrane(Supported)Nucleoplasm;Vesicles(Approved)				0	0	0	0	0	0	0	0	0	0	0	0	0	0	0	0	0	0	0	0	1
2583	B4GALNT1	0	0	1	2583	Gene_ID	H. sapiens	2583	H. sapiens	B4GALNT1	beta-1,4-N-acetyl-galactosaminyltransferase 1	GO:0001574 ganglioside biosynthetic process;GO:0001573 ganglioside metabolic process;GO:0006688 glycosphingolipid biosynthetic process		Enzymes/ENZYME proteins/Transferases					0	0	0	0	0	0	0	0	0	0	0	0	0	0	0	0	0	0	0	0	1
27344	PCSK1N	0	1	0	27344	Gene_ID	H. sapiens	27344	H. sapiens	PCSK1N	proprotein convertase subtilisin/kexin type 1 inhibitor	GO:0016486 peptide hormone processing;GO:0002021 response to dietary excess;GO:0010951 negative regulation of endopeptidase activity			Vesicles(Approved)			(M5951)HALLMARK SPERMATOGENESIS; (M5953)HALLMARK KRAS SIGNALING UP	0	0	0	0	1	0	0	0	1	0	0	0	0	0	0	0	0	0	0	0	1
255189	PLA2G4F	0	0	1	255189	Gene_ID	H. sapiens	255189	H. sapiens	PLA2G4F	phospholipase A2 group IVF	GO:0050482 arachidonic acid secretion;GO:0001516 prostaglandin biosynthetic process;GO:0036148 phosphatidylglycerol acyl-chain remodeling		Enzymes/ENZYME proteins/Hydrolases;RAS pathway related proteins	Nucleus;Vesicles(Approved)				0	0	0	0	0	0	0	0	0	0	0	0	0	0	0	0	0	0	0	0	1
3239	HOXD13	0	0	1	3239	Gene_ID	H. sapiens	3239	H. sapiens	HOXD13	homeobox D13	GO:0060687 regulation of branching involved in prostate gland morphogenesis;GO:0060527 prostate epithelial cord arborization involved in prostate glandular acinus morphogenesis;GO:0060526 prostate glandular acinus morphogenesis		Transcription factors/Helix-turn-helix domains	Nucleus(Supported)				0	0	0	0	0	1	1	1	0	1	0	0	1	0	1	0	0	0	0	0	1
150244	ZDHHC8P1	0	1	0	150244	Gene_ID	H. sapiens	150244	H. sapiens	ZDHHC8P1	ZDHHC8 pseudogene 1								0	0	0	0	0	0	0	0	0	0	0	0	0	0	0	0	0	0	0	0	1
8529	CYP4F2	1	0	0	8529	Gene_ID	H. sapiens	8529	H. sapiens	CYP4F2	cytochrome P450 family 4 subfamily F member 2	GO:0003095 pressure natriuresis;GO:0032304 negative regulation of icosanoid secretion;GO:0036101 leukotriene B4 catabolic process		Enzymes/ENZYME proteins/Oxidoreductases				(M5934)HALLMARK XENOBIOTIC METABOLISM	1	0	0	0	0	0	0	0	1	0	0	0	0	0	0	1	0	0	0	0	1
714	C1QC	1	0	0	714	Gene_ID	H. sapiens	714	H. sapiens	C1QC	complement C1q C chain	GO:0045650 negative regulation of macrophage differentiation;GO:0030853 negative regulation of granulocyte differentiation;GO:0030852 regulation of granulocyte differentiation			Vesicles(Uncertain)	Cetuximab;Etanercept;Adalimumab;Abciximab;Gemtuzumab ozogamicin;Trastuzumab;Rituximab;Basiliximab;Muromonab;Ibritumomab tiuxetan;Tositumomab;Alemtuzumab;Alefacept;Efalizumab;Natalizumab;Palivizumab;Daclizumab;Bevacizumab	(M5880)NABA ECM AFFILIATED; (M5885)NABA MATRISOME ASSOCIATED; (M5889)NABA MATRISOME	(M5921)HALLMARK COMPLEMENT	1	0	1	0	0	0	0	0	0	0	0	1	0	0	0	0	0	0	0	0	1
10753	CAPN9	1	0	0	10753	Gene_ID	H. sapiens	10753	H. sapiens	CAPN9	calpain 9	GO:0045214 sarcomere organization;GO:0030239 myofibril assembly;GO:0055002 striated muscle cell development		Enzymes/Peptidases/Cysteine-type peptidases				(M5956)HALLMARK KRAS SIGNALING DN	0	0	0	1	0	0	0	0	0	0	0	0	0	0	0	0	0	0	0	0	1
4316	MMP7	1	0	0	4316	Gene_ID	H. sapiens	4316	H. sapiens	MMP7	matrix metallopeptidase 7	GO:0044849 estrous cycle;GO:0022617 extracellular matrix disassembly;GO:0060135 maternal process involved in female pregnancy		Enzymes/{ENZYME proteins/Hydrolases,Peptidases/Metallopeptidases}	Nucleoplasm;Vesicles(Approved)	Marimastat (Zinc ion binding);(1R)-N,6-DIHYDROXY-7-METHOXY-2-[(4-METHOXYPHENYL)SULFONYL]-1,2,3,4-TETRAHYDROISOQUINOLINE-1-CARBOXAMIDE (Zinc ion binding);N4-HYDROXY-2-ISOBUTYL-N1-(9-OXO-1,8-DIAZA-TRICYCLO[10.6.1.013,18]NONADECA-12(19),13,15,17-TETRAEN-10-YL)-SUCCINAMIDE (Zinc ion binding);5-METHYL-3-(9-OXO-1,8-DIAZA-TRICYCLO[10.6.1.013,18]NONADECA-12(19),13,15,17-TETRAEN-10-YLCARBAMOYL)-HEXANOIC A…	(M198)PID SYNDECAN 1 PATHWAY; (M142)PID AJDISS 2PATHWAY; (M153)PID P75 NTR PATHWAY	(M5946)HALLMARK COAGULATION	1	0	0	1	1	0	0	0	0	0	0	0	0	0	0	0	0	0	0	0	1
4360	MRC1	1	0	0	4360	Gene_ID	H. sapiens	4360	H. sapiens	MRC1	mannose receptor C-type 1	GO:0046718 viral entry into host cell;GO:0030260 entry into host cell;GO:0071353 cellular response to interleukin-4		CD markers					1	0	1	0	0	0	0	0	0	0	0	0	0	0	0	0	0	0	0	0	1
10149	GPR64	0	1	0	10149	Gene_ID	H. sapiens	10149	H. sapiens	ADGRG2	adhesion G protein-coupled receptor G2	GO:0007189 adenylate cyclase-activating G protein-coupled receptor signaling pathway;GO:0019933 cAMP-mediated signaling;GO:0007283 spermatogenesis		G-protein coupled receptors/{Family 2 (B) receptors,GPCRs excl olfactory receptors}	Plasma membrane(Supported)Cytosol(Approved)				0	0	0	0	0	0	0	0	0	0	0	0	0	0	0	0	0	0	0	0	1
135228	CD109	1	0	0	135228	Gene_ID	H. sapiens	135228	H. sapiens	CD109	CD109 molecule	GO:0072675 osteoclast fusion;GO:0072674 multinuclear osteoclast differentiation;GO:0010839 negative regulation of keratinocyte proliferation		CD markers			(M3468)NABA ECM REGULATORS; (M5885)NABA MATRISOME ASSOCIATED; (M5889)NABA MATRISOME		1	1	0	0	1	0	0	0	0	0	0	1	0	0	0	0	0	0	0	0	1
952	CD38	1	0	0	952	Gene_ID	H. sapiens	952	H. sapiens	CD38	CD38 molecule	GO:0014824 artery smooth muscle contraction;GO:0045907 positive regulation of vasoconstriction;GO:0014829 vascular smooth muscle contraction		CD markers;Enzymes/ENZYME proteins/{Hydrolases,Transferases}	Plasma membrane(Supported)	Daratumumab (Transferase activity)		(M5897)HALLMARK IL6 JAK STAT3 SIGNALING; (M5902)HALLMARK APOPTOSIS; (M5913)HALLMARK INTERFERON GAMMA RESPONSE	1	0	0	0	0	0	0	0	1	0	0	1	0	0	0	0	0	0	0	0	1
6373	CXCL11	1	0	0	6373	Gene_ID	H. sapiens	6373	H. sapiens	CXCL11	C-X-C motif chemokine ligand 11	GO:0051281 positive regulation of release of sequestered calcium ion into cytosol;GO:0051279 regulation of release of sequestered calcium ion into cytosol;GO:0010524 positive regulation of calcium ion transport into cytosol					(M222)PID CXCR3 PATHWAY; (M5883)NABA SECRETED FACTORS; (M5885)NABA MATRISOME ASSOCIATED	(M5897)HALLMARK IL6 JAK STAT3 SIGNALING; (M5911)HALLMARK INTERFERON ALPHA RESPONSE; (M5932)HALLMARK INFLAMMATORY RESPONSE	1	0	1	0	0	0	0	0	0	0	0	0	0	0	0	0	0	1	0	0	1
152	ADRA2C	0	1	0	152	Gene_ID	H. sapiens	152	H. sapiens	ADRA2C	adrenoceptor alpha 2C	GO:0070473 negative regulation of uterine smooth muscle contraction;GO:0032811 negative regulation of epinephrine secretion;GO:0010700 negative regulation of norepinephrine secretion		G-protein coupled receptors/GPCRs excl olfactory receptors		Ziprasidone (Protein homodimerization activity);Cabergoline (Protein homodimerization activity);Ropinirole (Protein homodimerization activity);Olanzapine (Protein homodimerization activity);Clozapine (Protein homodimerization activity);Norepinephrine (Protein homodimerization activity);Mirtazapine (Protein homodimerization activity);Loxapine (Protein homodimerization activity);Pramipexole (Protei…		(M5956)HALLMARK KRAS SIGNALING DN	1	0	0	0	0	0	0	0	1	0	0	0	0	0	0	0	0	0	0	0	1
728116	ZBTB8B	0	1	0	728116	Gene_ID	H. sapiens	728116	H. sapiens	ZBTB8B	zinc finger and BTB domain containing 8B	GO:0006357 regulation of transcription by RNA polymerase II;GO:0006366 transcription by RNA polymerase II;GO:0006355 regulation of transcription, DNA-templated		Transcription factors/Zinc-coordinating DNA-binding domains					0	0	0	0	0	0	0	0	0	0	0	0	0	0	0	0	0	0	0	0	1
135250	RAET1E	0	1	0	135250	Gene_ID	H. sapiens	135250	H. sapiens	RAET1E	retinoic acid early transcript 1E	GO:0045954 positive regulation of natural killer cell mediated cytotoxicity;GO:0002717 positive regulation of natural killer cell mediated immunity;GO:0042269 regulation of natural killer cell mediated cytotoxicity			Cytosol;Focal adhesion sites(Approved)				0	0	0	0	0	0	0	0	0	0	0	0	0	0	0	0	0	0	0	0	1
113730	KLHDC7B	0	1	0	113730	Gene_ID	H. sapiens	113730	H. sapiens	KLHDC7B	kelch domain containing 7B								0	0	0	0	0	0	0	0	0	0	0	0	0	0	0	0	0	0	0	0	1
23213	SULF1	1	0	0	23213	Gene_ID	H. sapiens	23213	H. sapiens	SULF1	sulfatase 1	GO:0060686 negative regulation of prostatic bud formation;GO:0060685 regulation of prostatic bud formation;GO:0014846 esophagus smooth muscle contraction					(M3468)NABA ECM REGULATORS; (M5885)NABA MATRISOME ASSOCIATED; (M5889)NABA MATRISOME		1	0	0	1	1	1	1	0	0	0	0	1	0	0	1	0	0	0	0	1	1
7134	TNNC1	1	0	0	7134	Gene_ID	H. sapiens	7134	H. sapiens	TNNC1	troponin C1, slow skeletal and cardiac type	GO:0032972 regulation of muscle filament sliding speed;GO:0002086 diaphragm contraction;GO:0032971 regulation of muscle filament sliding			Actin filaments;Mitochondria;Nucleoplasm(Approved)	Trifluoperazine (Troponin t binding);Levosimendan (Troponin t binding);Felodipine (Troponin t binding);Bepridil (Troponin t binding);Calcium (Troponin t binding);Aluminium monostearate (Troponin t binding);5-[1-(3,4-Dimethoxy-Benzoyl)-1,2,3,4-Tetrahydro-Quinolin-6-Yl]-6-Methyl-3,6-Dihydro-[1,3,4]Thiadiazin-2-One (Troponin t binding);N-(6-Aminohexyl)-5-Chloro-1-Naphthalenesulfonamide (Troponin t b…		(M5909)HALLMARK MYOGENESIS; (M5907)HALLMARK ESTROGEN RESPONSE LATE	0	0	0	0	0	0	0	0	0	0	0	0	0	0	0	0	0	0	0	0	1
10563	CXCL13	1	0	0	10563	Gene_ID	H. sapiens	10563	H. sapiens	CXCL13	C-X-C motif chemokine ligand 13	GO:2000545 negative regulation of endothelial cell chemotaxis to fibroblast growth factor;GO:1904848 negative regulation of cell chemotaxis to fibroblast growth factor;GO:2001027 negative regulation of endothelial cell chemotaxis					(M222)PID CXCR3 PATHWAY; (M5883)NABA SECRETED FACTORS; (M5885)NABA MATRISOME ASSOCIATED	(M5897)HALLMARK IL6 JAK STAT3 SIGNALING; (M5950)HALLMARK ALLOGRAFT REJECTION	1	0	1	0	0	0	0	0	0	0	0	1	0	0	0	0	0	1	0	1	1
79187	FSD1	0	1	0	79187	Gene_ID	H. sapiens	79187	H. sapiens	FSD1	fibronectin type III and SPRY domain containing 1	GO:0060236 regulation of mitotic spindle organization;GO:0090224 regulation of spindle organization;GO:0031122 cytoplasmic microtubule organization							0	0	0	0	0	0	0	0	0	0	0	0	0	0	0	0	0	0	0	0	1
92211	CDHR1	0	1	0	92211	Gene_ID	H. sapiens	92211	H. sapiens	CDHR1	cadherin related family member 1	GO:0008594 photoreceptor cell morphogenesis;GO:0035845 photoreceptor cell outer segment organization;GO:0045494 photoreceptor cell maintenance							0	0	0	0	0	0	0	0	0	0	0	0	0	0	0	0	0	0	0	0	1
378825	NCRNA00162	1	0	0	378825	Gene_ID	H. sapiens	378825	H. sapiens	PICSAR	P38 inhibited cutaneous squamous cell carcinoma associated lincRNA								0	0	0	0	0	0	0	0	0	0	0	0	0	0	0	0	0	0	0	0	1
147920	IGFL2	1	0	0	147920	Gene_ID	H. sapiens	147920	H. sapiens	IGFL2	IGF like family member 2	GO:0008150 biological_process			Nucleoplasm;Plasma membrane(Approved)				0	0	0	0	0	0	0	0	0	0	0	0	0	0	0	0	0	0	0	0	1
2568	GABRP	1	0	0	2568	Gene_ID	H. sapiens	2568	H. sapiens	GABRP	gamma-aminobutyric acid type A receptor subunit pi	GO:1902476 chloride transmembrane transport;GO:0006821 chloride transport;GO:0098661 inorganic anion transmembrane transport				Temazepam (Gaba-a receptor activity);Adinazolam (Gaba-a receptor activity);Midazolam (Gaba-a receptor activity);Flurazepam (Gaba-a receptor activity);Halazepam (Gaba-a receptor activity);Diazepam (Gaba-a receptor activity);Oxazepam (Gaba-a receptor activity);Triazolam (Gaba-a receptor activity);Ethanol (Gaba-a receptor activity);Estazolam (Gaba-a receptor activity);Bromazepam (Gaba-a receptor act…			0	0	0	0	0	0	0	0	0	0	0	0	0	0	0	0	0	0	0	0	1
54578	UGT1A6	0	0	1	54578	Gene_ID	H. sapiens	54578	H. sapiens	UGT1A6	UDP glucuronosyltransferase family 1 member A6	GO:0052696 flavonoid glucuronidation;GO:0052697 xenobiotic glucuronidation;GO:0052695 cellular glucuronidation		Enzymes/ENZYME proteins/Transferases					0	0	0	0	0	0	0	0	0	0	0	0	0	0	0	1	1	0	0	0	1
9509	ADAMTS2	1	0	0	9509	Gene_ID	H. sapiens	9509	H. sapiens	ADAMTS2	ADAM metallopeptidase with thrombospondin type 1 motif 2	GO:0030199 collagen fibril organization;GO:0030574 collagen catabolic process;GO:0030324 lung development		Enzymes/ENZYME proteins/Hydrolases	Plasma membrane;Vesicles(Approved)		(M3468)NABA ECM REGULATORS; (M5885)NABA MATRISOME ASSOCIATED; (M5889)NABA MATRISOME		1	1	0	1	1	0	0	0	0	0	0	0	0	0	0	0	0	0	0	0	1
4283	CXCL9	1	0	0	4283	Gene_ID	H. sapiens	4283	H. sapiens	CXCL9	C-X-C motif chemokine ligand 9	GO:0051281 positive regulation of release of sequestered calcium ion into cytosol;GO:0051279 regulation of release of sequestered calcium ion into cytosol;GO:0010524 positive regulation of calcium ion transport into cytosol					(M196)PID IL23 PATHWAY; (M222)PID CXCR3 PATHWAY; (M5883)NABA SECRETED FACTORS	(M5897)HALLMARK IL6 JAK STAT3 SIGNALING; (M5913)HALLMARK INTERFERON GAMMA RESPONSE; (M5932)HALLMARK INFLAMMATORY RESPONSE	1	0	1	0	0	0	0	0	0	0	0	0	0	0	0	0	0	1	0	0	1
151887	CCDC80	1	0	0	151887	Gene_ID	H. sapiens	151887	H. sapiens	CCDC80	coiled-coil domain containing 80	GO:0010811 positive regulation of cell-substrate adhesion;GO:0010810 regulation of cell-substrate adhesion;GO:0045785 positive regulation of cell adhesion							0	0	1	1	0	0	0	0	0	0	0	1	0	0	0	0	0	0	0	0	1
10110	SGK2	1	0	0	10110	Gene_ID	H. sapiens	10110	H. sapiens	SGK2	serum/glucocorticoid regulated kinase 2	GO:0032411 positive regulation of transporter activity;GO:0018105 peptidyl-serine phosphorylation;GO:0032409 regulation of transporter activity	AGC Ser/Thr protein kinase family	Enzymes/{ENZYME proteins/Transferases,Kinases/AGC Ser/Thr protein kinases}	Nucleoplasm(Supported)				0	0	0	0	0	0	0	0	0	0	0	0	0	0	0	0	0	0	0	0	1
3559	IL2RA	1	0	0	3559	Gene_ID	H. sapiens	3559	H. sapiens	IL2RA	interleukin 2 receptor subunit alpha	GO:0046013 regulation of T cell homeostatic proliferation;GO:0001777 T cell homeostatic proliferation;GO:0042104 positive regulation of activated T cell proliferation		CD markers		Denileukin diftitox (Interleukin-2 receptor activity);Aldesleukin (Interleukin-2 receptor activity);Basiliximab (Interleukin-2 receptor activity);Daclizumab (Interleukin-2 receptor activity)	(M235)PID TCR CALCIUM PATHWAY; (M234)PID IL2 STAT5 PATHWAY; (M290)PID IL12 STAT4 PATHWAY	(M5897)HALLMARK IL6 JAK STAT3 SIGNALING; (M5947)HALLMARK IL2 STAT5 SIGNALING; (M5950)HALLMARK ALLOGRAFT REJECTION	1	0	0	0	0	0	0	0	0	0	0	1	0	0	0	0	0	1	0	0	1
1311	COMP	1	0	0	1311	Gene_ID	H. sapiens	1311	H. sapiens	COMP	cartilage oligomeric matrix protein	GO:0014829 vascular smooth muscle contraction;GO:0097084 vascular smooth muscle cell development;GO:0010260 animal organ senescence			Golgi apparatus(Approved)	Calcium (Protease binding)	(M3008)NABA ECM GLYCOPROTEINS; (M5884)NABA CORE MATRISOME; (M5889)NABA MATRISOME	(M5946)HALLMARK COAGULATION; (M5930)HALLMARK EPITHELIAL MESENCHYMAL TRANSITION	0	1	0	1	0	0	1	0	1	1	0	0	0	0	0	0	0	0	0	1	1
6097	RORC	0	1	0	6097	Gene_ID	H. sapiens	6097	H. sapiens	RORC	RAR related orphan receptor C	GO:0072539 T-helper 17 cell differentiation;GO:0042093 T-helper cell differentiation;GO:0002294 CD4-positive, alpha-beta T cell differentiation involved in immune response		Nuclear receptors;Transcription factors/Zinc-coordinating DNA-binding domains	Nuclear bodies(Supported)				0	0	1	0	0	0	0	0	0	0	0	0	0	0	0	0	0	0	0	0	1
115362	GBP5	1	0	0	115362	Gene_ID	H. sapiens	115362	H. sapiens	GBP5	guanylate binding protein 5	GO:0072616 interleukin-18 secretion;GO:1900227 positive regulation of NLRP3 inflammasome complex assembly;GO:1900017 positive regulation of cytokine production involved in inflammatory response			Endoplasmic reticulum(Approved)				1	0	1	0	0	0	0	0	1	0	0	0	0	0	0	0	0	0	0	0	1
4010	LMX1B	0	1	0	4010	Gene_ID	H. sapiens	4010	H. sapiens	LMX1B	LIM homeobox transcription factor 1 beta	GO:0071542 dopaminergic neuron differentiation;GO:0009953 dorsal/ventral pattern formation;GO:0001701 in utero embryonic development		Transcription factors/Helix-turn-helix domains	Nucleus(Approved)				0	0	0	0	0	0	1	1	0	0	0	0	0	0	0	0	0	0	0	0	1
4837	NNMT	1	0	0	4837	Gene_ID	H. sapiens	4837	H. sapiens	NNMT	nicotinamide N-methyltransferase	GO:0034356 NAD biosynthesis via nicotinamide riboside salvage pathway;GO:0009435 NAD biosynthetic process;GO:0019674 NAD metabolic process		Enzymes/ENZYME proteins/Transferases	Cytosol(Supported)Golgi apparatus;Nucleoplasm(Approved)	Niacin (Nicotinamide n-methyltransferase activity)		(M5930)HALLMARK EPITHELIAL MESENCHYMAL TRANSITION	0	0	0	0	0	0	0	0	0	0	0	0	0	0	0	1	0	0	0	0	1
201501	ZBTB7C	1	0	0	201501	Gene_ID	H. sapiens	201501	H. sapiens	ZBTB7C	zinc finger and BTB domain containing 7C	GO:1903025 regulation of RNA polymerase II regulatory region sequence-specific DNA binding;GO:0045600 positive regulation of fat cell differentiation;GO:2000677 regulation of transcription regulatory region DNA binding		Transcription factors/Zinc-coordinating DNA-binding domains					0	0	0	0	0	0	0	0	0	0	0	1	0	0	0	0	0	0	0	0	1
196047	EMX2OS	1	0	0	196047	Gene_ID	H. sapiens	196047	H. sapiens	EMX2OS	EMX2 opposite strand/antisense RNA								0	0	0	0	0	0	0	0	0	0	0	0	0	0	0	0	0	0	0	0	1
7130	TNFAIP6	1	0	0	7130	Gene_ID	H. sapiens	7130	H. sapiens	TNFAIP6	TNF alpha induced protein 6	GO:0030728 ovulation;GO:0043312 neutrophil degranulation;GO:0002283 neutrophil activation involved in immune response				Hyaluronic acid (Hyaluronic acid binding)	(M3008)NABA ECM GLYCOPROTEINS; (M5884)NABA CORE MATRISOME; (M5889)NABA MATRISOME	(M5932)HALLMARK INFLAMMATORY RESPONSE; (M5913)HALLMARK INTERFERON GAMMA RESPONSE; (M5890)HALLMARK TNFA SIGNALING VIA NFKB	1	0	0	1	0	0	0	0	0	0	0	0	0	0	0	0	0	0	0	0	1
23281	MTUS2	1	0	0	23281	Gene_ID	H. sapiens	23281	H. sapiens	MTUS2	microtubule associated scaffold protein 2				Cytokinetic bridge;Microtubules(Supported)				0	0	0	0	0	0	0	0	0	0	0	0	0	0	0	0	0	0	0	0	1
51806	CALML5	1	0	0	51806	Gene_ID	H. sapiens	51806	H. sapiens	CALML5	calmodulin like 5	GO:0043312 neutrophil degranulation;GO:0002283 neutrophil activation involved in immune response;GO:0042119 neutrophil activation		RAS pathway related proteins	Cytosol;Plasma membrane(Approved)			(M5956)HALLMARK KRAS SIGNALING DN	0	1	0	0	0	0	0	0	0	0	0	0	0	0	0	0	0	0	0	0	1
10170	DHRS9	1	0	0	10170	Gene_ID	H. sapiens	10170	H. sapiens	DHRS9	dehydrogenase/reductase 9	GO:0042904 9-cis-retinoic acid biosynthetic process;GO:0042905 9-cis-retinoic acid metabolic process;GO:0002138 retinoic acid biosynthetic process							1	1	0	0	0	0	0	0	1	0	0	0	0	0	0	0	1	0	0	0	1
1805	DPT	1	0	0	1805	Gene_ID	H. sapiens	1805	H. sapiens	DPT	dermatopontin	GO:0030199 collagen fibril organization;GO:0030198 extracellular matrix organization;GO:0043062 extracellular structure organization			Vesicles(Approved)		(M3008)NABA ECM GLYCOPROTEINS; (M5884)NABA CORE MATRISOME; (M5889)NABA MATRISOME		0	0	0	1	0	0	0	0	0	0	0	1	0	0	0	0	0	0	0	0	1
4502	MT2A	1	0	0	4502	Gene_ID	H. sapiens	4502	H. sapiens	MT2A	metallothionein 2A	GO:0010273 detoxification of copper ion;GO:0036018 cellular response to erythropoietin;GO:0036016 cellular response to interleukin-3					(M167)PID AP1 PATHWAY	(M5913)HALLMARK INTERFERON GAMMA RESPONSE; (M5891)HALLMARK HYPOXIA; (M5934)HALLMARK XENOBIOTIC METABOLISM	1	0	0	0	0	0	0	0	0	0	1	0	0	0	0	0	0	1	0	0	1
10082	GPC6	1	0	0	10082	Gene_ID	H. sapiens	10082	H. sapiens	GPC6	glypican 6	GO:0098696 regulation of neurotransmitter receptor localization to postsynaptic specialization membrane;GO:0099645 neurotransmitter receptor localization to postsynaptic specialization membrane;GO:0060071 Wnt signaling pathway, planar cell polarity pathway			Golgi apparatus;Vesicles(Approved)		(M5880)NABA ECM AFFILIATED; (M5885)NABA MATRISOME ASSOCIATED; (M5889)NABA MATRISOME		1	0	0	0	0	0	0	0	0	0	0	0	0	0	0	0	1	0	0	0	1
10578	GNLY	1	0	0	10578	Gene_ID	H. sapiens	10578	H. sapiens	GNLY	granulysin	GO:0006968 cellular defense response;GO:0061844 antimicrobial humoral immune response mediated by antimicrobial peptide;GO:0031640 killing of cells of other organism		Transporters/Transporter channels and pores		3[N-Morpholino]Propane Sulfonic Acid			0	0	1	0	0	0	0	0	0	0	1	0	0	0	0	0	0	0	0	0	1
57615	ZNF492	0	1	0	57615	Gene_ID	H. sapiens	57615	H. sapiens	ZNF492	zinc finger protein 492	GO:0006355 regulation of transcription, DNA-templated;GO:1903506 regulation of nucleic acid-templated transcription;GO:0006351 transcription, DNA-templated		Transcription factors/Zinc-coordinating DNA-binding domains					0	0	0	0	0	0	0	0	0	0	0	0	0	0	0	0	0	0	0	0	1

## Sheet: Table S5.
Enrichment of differentially enriched gene signaling pathways between the high and low m6Ascore groups
GroupID	Category	Term	Description	LogP	Log(q-value)	InTerm_InList	Genes	Symbols
1_Summary	Canonical Pathways	M5885	NABA MATRISOME ASSOCIATED	-28.397	-24.0779	59/753	12,651,712,713,714,1440,1510,2069,2919,3569,3624,3627,3960,4283,4314,4316,4318,4583,5055,5265,5266,5275,6278,6279,6280,6317,6318,6348,6351,6357,6359,6362,6366,6373,6374,6423,6424,6469,8710,8728,9509,9982,10082,10563,10855,11199,23213,25884,26585,30835,54757,55959,57556,57758,94025,94031,135228,338324,341640,719,1803,6288,4920,387695,480,776,844,952,2357,2946,4241,4499,4502,6338,6340,6549,7380,778…	SERPINA3,BMP3,C1QA,C1QB,C1QC,CSF3,CTSE,EREG,CXCL1,IL6,INHBA,CXCL10,LGALS4,CXCL9,MMP3,MMP7,MMP9,MUC2,SERPINB2,SERPINA1,PI3,SERPINB13,S100A7,S100A8,S100A9,SERPINB3,SERPINB4,CCL3,CCL4,CCL13,CCL15,CCL18,CCL21,CXCL11,CXCL5,SFRP2,SFRP4,SHH,SERPINB7,ADAM19,ADAMTS2,FGFBP1,GPC6,CXCL13,HPSE,ANXA10,SULF1,CHRDL2,GREM1,CD209,FAM20A,SULF2,SEMA6A,SCUBE2,MUC16,HTRA3,CD109,S100A7A,FREM2,C3AR1,DPP4,SAA1,ROR2,C10or…
1_Member	Canonical Pathways	M5885	NABA MATRISOME ASSOCIATED	-28.397	-24.0779	59/753	12,651,712,713,714,1440,1510,2069,2919,3569,3624,3627,3960,4283,4314,4316,4318,4583,5055,5265,5266,5275,6278,6279,6280,6317,6318,6348,6351,6357,6359,6362,6366,6373,6374,6423,6424,6469,8710,8728,9509,9982,10082,10563,10855,11199,23213,25884,26585,30835,54757,55959,57556,57758,94025,94031,135228,338324,341640	SERPINA3,BMP3,C1QA,C1QB,C1QC,CSF3,CTSE,EREG,CXCL1,IL6,INHBA,CXCL10,LGALS4,CXCL9,MMP3,MMP7,MMP9,MUC2,SERPINB2,SERPINA1,PI3,SERPINB13,S100A7,S100A8,S100A9,SERPINB3,SERPINB4,CCL3,CCL4,CCL13,CCL15,CCL18,CCL21,CXCL11,CXCL5,SFRP2,SFRP4,SHH,SERPINB7,ADAM19,ADAMTS2,FGFBP1,GPC6,CXCL13,HPSE,ANXA10,SULF1,CHRDL2,GREM1,CD209,FAM20A,SULF2,SEMA6A,SCUBE2,MUC16,HTRA3,CD109,S100A7A,FREM2
1_Member	GO Biological Processes	GO:0030593	neutrophil chemotaxis	-13.8512	-10.0092	17/100	719,1803,2919,3627,4283,6279,6280,6288,6348,6351,6357,6359,6362,6366,6373,6374,10563	C3AR1,DPP4,CXCL1,CXCL10,CXCL9,S100A8,S100A9,SAA1,CCL3,CCL4,CCL13,CCL15,CCL18,CCL21,CXCL11,CXCL5,CXCL13
1_Member	GO Biological Processes	GO:0071621	granulocyte chemotaxis	-13.7098	-9.99274	18/119	719,1803,2919,3627,4283,6278,6279,6280,6288,6348,6351,6357,6359,6362,6366,6373,6374,10563	C3AR1,DPP4,CXCL1,CXCL10,CXCL9,S100A7,S100A8,S100A9,SAA1,CCL3,CCL4,CCL13,CCL15,CCL18,CCL21,CXCL11,CXCL5,CXCL13
1_Member	Canonical Pathways	M5883	NABA SECRETED FACTORS	-13.017	-9.39691	27/344	651,1440,2069,2919,3569,3624,3627,4283,6278,6279,6280,6348,6351,6357,6359,6362,6366,6373,6374,6423,6424,6469,9982,10563,25884,57758,338324	BMP3,CSF3,EREG,CXCL1,IL6,INHBA,CXCL10,CXCL9,S100A7,S100A8,S100A9,CCL3,CCL4,CCL13,CCL15,CCL18,CCL21,CXCL11,CXCL5,SFRP2,SFRP4,SHH,FGFBP1,CXCL13,CHRDL2,SCUBE2,S100A7A
1_Member	GO Biological Processes	GO:1990266	neutrophil migration	-12.6826	-9.14164	17/117	719,1803,2919,3627,4283,6279,6280,6288,6348,6351,6357,6359,6362,6366,6373,6374,10563	C3AR1,DPP4,CXCL1,CXCL10,CXCL9,S100A8,S100A9,SAA1,CCL3,CCL4,CCL13,CCL15,CCL18,CCL21,CXCL11,CXCL5,CXCL13
1_Member	GO Biological Processes	GO:0097530	granulocyte migration	-12.4537	-9.03771	18/140	719,1803,2919,3627,4283,6278,6279,6280,6288,6348,6351,6357,6359,6362,6366,6373,6374,10563	C3AR1,DPP4,CXCL1,CXCL10,CXCL9,S100A7,S100A8,S100A9,SAA1,CCL3,CCL4,CCL13,CCL15,CCL18,CCL21,CXCL11,CXCL5,CXCL13
1_Member	GO Biological Processes	GO:0097529	myeloid leukocyte migration	-12.1694	-8.80454	21/212	719,1803,2919,3569,3627,4283,4920,6278,6279,6280,6288,6348,6351,6357,6359,6362,6366,6373,6374,10563,26585	C3AR1,DPP4,CXCL1,IL6,CXCL10,CXCL9,ROR2,S100A7,S100A8,S100A9,SAA1,CCL3,CCL4,CCL13,CCL15,CCL18,CCL21,CXCL11,CXCL5,CXCL13,GREM1
1_Member	GO Biological Processes	GO:0030595	leukocyte chemotaxis	-11.7412	-8.50129	21/223	719,1803,2919,3569,3627,4283,6278,6279,6280,6288,6348,6351,6357,6359,6362,6366,6373,6374,10563,26585,387695	C3AR1,DPP4,CXCL1,IL6,CXCL10,CXCL9,S100A7,S100A8,S100A9,SAA1,CCL3,CCL4,CCL13,CCL15,CCL18,CCL21,CXCL11,CXCL5,CXCL13,GREM1,C10orf99
1_Member	GO Biological Processes	GO:0048247	lymphocyte chemotaxis	-10.3864	-7.32255	12/65	3627,6278,6288,6348,6351,6357,6359,6362,6366,6373,10563,387695	CXCL10,S100A7,SAA1,CCL3,CCL4,CCL13,CCL15,CCL18,CCL21,CXCL11,CXCL13,C10orf99
1_Member	GO Biological Processes	GO:0060326	cell chemotaxis	-9.21135	-6.29019	21/304	719,1803,2919,3569,3627,4283,6278,6279,6280,6288,6348,6351,6357,6359,6362,6366,6373,6374,10563,26585,387695	C3AR1,DPP4,CXCL1,IL6,CXCL10,CXCL9,S100A7,S100A8,S100A9,SAA1,CCL3,CCL4,CCL13,CCL15,CCL18,CCL21,CXCL11,CXCL5,CXCL13,GREM1,C10orf99
1_Member	GO Biological Processes	GO:0070098	chemokine-mediated signaling pathway	-8.79466	-5.95267	12/88	2919,3627,4283,6348,6351,6357,6359,6362,6366,6373,6374,10563	CXCL1,CXCL10,CXCL9,CCL3,CCL4,CCL13,CCL15,CCL18,CCL21,CXCL11,CXCL5,CXCL13
1_Member	Reactome Gene Sets	R-HSA-380108	Chemokine receptors bind chemokines	-8.36947	-5.61857	10/59	2919,3627,4283,6348,6351,6357,6366,6373,6374,10563	CXCL1,CXCL10,CXCL9,CCL3,CCL4,CCL13,CCL21,CXCL11,CXCL5,CXCL13
1_Member	GO Biological Processes	GO:1990868	response to chemokine	-8.29946	-5.58241	12/97	2919,3627,4283,6348,6351,6357,6359,6362,6366,6373,6374,10563	CXCL1,CXCL10,CXCL9,CCL3,CCL4,CCL13,CCL15,CCL18,CCL21,CXCL11,CXCL5,CXCL13
1_Member	GO Biological Processes	GO:1990869	cellular response to chemokine	-8.29946	-5.58241	12/97	2919,3627,4283,6348,6351,6357,6359,6362,6366,6373,6374,10563	CXCL1,CXCL10,CXCL9,CCL3,CCL4,CCL13,CCL15,CCL18,CCL21,CXCL11,CXCL5,CXCL13
1_Member	GO Biological Processes	GO:0098771	inorganic ion homeostasis	-8.23241	-5.52609	32/759	480,719,776,844,952,2357,2946,3627,4241,4283,4499,4502,6279,6280,6288,6338,6340,6348,6357,6359,6366,6373,6424,6549,7380,7780,8529,10563,54757,64072,66002,389015	ATP1A4,C3AR1,CACNA1D,CASQ1,CD38,FPR1,GSTM2,CXCL10,MELTF,CXCL9,MT1M,MT2A,S100A8,S100A9,SAA1,SCNN1B,SCNN1G,CCL3,CCL13,CCL15,CCL21,CXCL11,SFRP4,SLC9A2,UPK3A,SLC30A2,CYP4F2,CXCL13,FAM20A,CDH23,CYP4F12,SLC9A4
1_Member	GO Biological Processes	GO:0050900	leukocyte migration	-7.88679	-5.22778	25/504	719,1803,2335,2919,3569,3627,3897,4283,4920,6278,6279,6280,6288,6348,6351,6357,6359,6362,6366,6373,6374,6566,10563,26585,387695	C3AR1,DPP4,FN1,CXCL1,IL6,CXCL10,L1CAM,CXCL9,ROR2,S100A7,S100A8,S100A9,SAA1,CCL3,CCL4,CCL13,CCL15,CCL18,CCL21,CXCL11,CXCL5,SLC16A1,CXCL13,GREM1,C10orf99
1_Member	GO Biological Processes	GO:0055080	cation homeostasis	-7.81665	-5.17518	31/748	480,719,776,844,952,2357,2946,3627,4241,4283,4499,4502,6279,6280,6288,6338,6340,6348,6357,6359,6366,6373,6549,7380,7780,8529,10563,54757,64072,66002,389015	ATP1A4,C3AR1,CACNA1D,CASQ1,CD38,FPR1,GSTM2,CXCL10,MELTF,CXCL9,MT1M,MT2A,S100A8,S100A9,SAA1,SCNN1B,SCNN1G,CCL3,CCL13,CCL15,CCL21,CXCL11,SLC9A2,UPK3A,SLC30A2,CYP4F2,CXCL13,FAM20A,CDH23,CYP4F12,SLC9A4
1_Member	GO Biological Processes	GO:0002548	monocyte chemotaxis	-7.81305	-5.17518	10/67	3569,3627,6278,6348,6351,6357,6359,6362,6366,26585	IL6,CXCL10,S100A7,CCL3,CCL4,CCL13,CCL15,CCL18,CCL21,GREM1
1_Member	GO Biological Processes	GO:0055065	metal ion homeostasis	-7.77713	-5.14822	29/668	480,719,776,844,952,2357,2946,3627,4241,4283,4499,4502,6279,6280,6288,6338,6340,6348,6357,6359,6366,6373,7380,7780,8529,10563,54757,64072,66002	ATP1A4,C3AR1,CACNA1D,CASQ1,CD38,FPR1,GSTM2,CXCL10,MELTF,CXCL9,MT1M,MT2A,S100A8,S100A9,SAA1,SCNN1B,SCNN1G,CCL3,CCL13,CCL15,CCL21,CXCL11,UPK3A,SLC30A2,CYP4F2,CXCL13,FAM20A,CDH23,CYP4F12
1_Member	GO Biological Processes	GO:0071674	mononuclear cell migration	-7.49884	-4.91213	11/92	719,3569,3627,6278,6348,6351,6357,6359,6362,6366,26585	C3AR1,IL6,CXCL10,S100A7,CCL3,CCL4,CCL13,CCL15,CCL18,CCL21,GREM1
1_Member	GO Biological Processes	GO:0072676	lymphocyte migration	-7.41049	-4.83175	12/116	3627,6278,6288,6348,6351,6357,6359,6362,6366,6373,10563,387695	CXCL10,S100A7,SAA1,CCL3,CCL4,CCL13,CCL15,CCL18,CCL21,CXCL11,CXCL13,C10orf99
1_Member	KEGG Pathway	hsa04060	Cytokine-cytokine receptor interaction	-6.97793	-4.45817	17/270	1440,2919,3559,3569,3575,3624,3627,4283,6348,6351,6357,6359,6362,6366,6373,6374,10563	CSF3,CXCL1,IL2RA,IL6,IL7R,INHBA,CXCL10,CXCL9,CCL3,CCL4,CCL13,CCL15,CCL18,CCL21,CXCL11,CXCL5,CXCL13
1_Member	GO Biological Processes	GO:0006935	chemotaxis	-6.90031	-4.39412	27/649	719,1803,2152,2297,2357,2919,3569,3627,3897,4283,6278,6279,6280,6288,6348,6351,6357,6359,6362,6366,6373,6374,6469,10563,26585,57556,387695	C3AR1,DPP4,F3,FOXD1,FPR1,CXCL1,IL6,CXCL10,L1CAM,CXCL9,S100A7,S100A8,S100A9,SAA1,CCL3,CCL4,CCL13,CCL15,CCL18,CCL21,CXCL11,CXCL5,SHH,CXCL13,GREM1,SEMA6A,C10orf99
1_Member	GO Biological Processes	GO:0042330	taxis	-6.87364	-4.39335	27/651	719,1803,2152,2297,2357,2919,3569,3627,3897,4283,6278,6279,6280,6288,6348,6351,6357,6359,6362,6366,6373,6374,6469,10563,26585,57556,387695	C3AR1,DPP4,F3,FOXD1,FPR1,CXCL1,IL6,CXCL10,L1CAM,CXCL9,S100A7,S100A8,S100A9,SAA1,CCL3,CCL4,CCL13,CCL15,CCL18,CCL21,CXCL11,CXCL5,SHH,CXCL13,GREM1,SEMA6A,C10orf99
1_Member	Reactome Gene Sets	R-HSA-375276	Peptide ligand-binding receptors	-6.37401	-3.97918	14/201	719,2357,2919,3627,4283,6288,6348,6351,6357,6366,6373,6374,6866,10563	C3AR1,FPR1,CXCL1,CXCL10,CXCL9,SAA1,CCL3,CCL4,CCL13,CCL21,CXCL11,CXCL5,TAC3,CXCL13
1_Member	KEGG Pathway	hsa04062	Chemokine signaling pathway	-6.08377	-3.72846	13/182	2786,2919,3627,4283,6348,6351,6357,6359,6362,6366,6373,6374,10563	GNG4,CXCL1,CXCL10,CXCL9,CCL3,CCL4,CCL13,CCL15,CCL18,CCL21,CXCL11,CXCL5,CXCL13
1_Member	GO Biological Processes	GO:1901623	regulation of lymphocyte chemotaxis	-5.96591	-3.61994	6/27	3627,6278,6348,6351,6366,10563	CXCL10,S100A7,CCL3,CCL4,CCL21,CXCL13
1_Member	GO Biological Processes	GO:0010818	T cell chemotaxis	-5.86593	-3.54116	6/28	3627,6278,6348,6366,6373,10563	CXCL10,S100A7,CCL3,CCL21,CXCL11,CXCL13
1_Member	GO Biological Processes	GO:0072507	divalent inorganic cation homeostasis	-5.75578	-3.45371	22/526	719,776,844,952,2357,2946,3627,4283,4499,4502,6279,6280,6288,6348,6357,6359,6366,6373,7780,10563,54757,64072	C3AR1,CACNA1D,CASQ1,CD38,FPR1,GSTM2,CXCL10,CXCL9,MT1M,MT2A,S100A8,S100A9,SAA1,CCL3,CCL13,CCL15,CCL21,CXCL11,SLC30A2,CXCL13,FAM20A,CDH23
1_Member	GO Biological Processes	GO:0002688	regulation of leukocyte chemotaxis	-5.50576	-3.25484	10/117	719,1803,3569,3627,6278,6348,6351,6366,10563,26585	C3AR1,DPP4,IL6,CXCL10,S100A7,CCL3,CCL4,CCL21,CXCL13,GREM1
1_Member	GO Biological Processes	GO:0072503	cellular divalent inorganic cation homeostasis	-5.45316	-3.2096	21/507	719,776,844,952,2357,2946,3627,4283,4499,4502,6279,6280,6288,6348,6357,6359,6366,6373,7780,10563,64072	C3AR1,CACNA1D,CASQ1,CD38,FPR1,GSTM2,CXCL10,CXCL9,MT1M,MT2A,S100A8,S100A9,SAA1,CCL3,CCL13,CCL15,CCL21,CXCL11,SLC30A2,CXCL13,CDH23
1_Member	GO Biological Processes	GO:0140131	positive regulation of lymphocyte chemotaxis	-5.20998	-3.00482	5/21	6278,6348,6351,6366,10563	S100A7,CCL3,CCL4,CCL21,CXCL13
1_Member	GO Biological Processes	GO:0030003	cellular cation homeostasis	-5.05228	-2.8699	24/672	480,719,776,844,952,2357,2946,3627,4283,4499,4502,6279,6280,6288,6348,6357,6359,6366,6373,6549,7780,10563,64072,389015	ATP1A4,C3AR1,CACNA1D,CASQ1,CD38,FPR1,GSTM2,CXCL10,CXCL9,MT1M,MT2A,S100A8,S100A9,SAA1,CCL3,CCL13,CCL15,CCL21,CXCL11,SLC9A2,SLC30A2,CXCL13,CDH23,SLC9A4
1_Member	GO Biological Processes	GO:2000403	positive regulation of lymphocyte migration	-5.04844	-2.86921	6/38	3627,6278,6348,6351,6366,10563	CXCL10,S100A7,CCL3,CCL4,CCL21,CXCL13
1_Member	GO Biological Processes	GO:0006873	cellular ion homeostasis	-4.91519	-2.76044	24/685	480,719,776,844,952,2357,2946,3627,4283,4499,4502,6279,6280,6288,6348,6357,6359,6366,6373,6549,7780,10563,64072,389015	ATP1A4,C3AR1,CACNA1D,CASQ1,CD38,FPR1,GSTM2,CXCL10,CXCL9,MT1M,MT2A,S100A8,S100A9,SAA1,CCL3,CCL13,CCL15,CCL21,CXCL11,SLC9A2,SLC30A2,CXCL13,CDH23,SLC9A4
1_Member	GO Biological Processes	GO:0006875	cellular metal ion homeostasis	-4.89478	-2.74886	22/596	480,719,776,844,952,2357,2946,3627,4283,4499,4502,6279,6280,6288,6348,6357,6359,6366,6373,7780,10563,64072	ATP1A4,C3AR1,CACNA1D,CASQ1,CD38,FPR1,GSTM2,CXCL10,CXCL9,MT1M,MT2A,S100A8,S100A9,SAA1,CCL3,CCL13,CCL15,CCL21,CXCL11,SLC30A2,CXCL13,CDH23
1_Member	Reactome Gene Sets	R-HSA-500792	GPCR ligand binding	-4.87756	-2.73455	19/467	719,1392,2357,2786,2919,3627,4283,5744,6288,6348,6351,6357,6366,6373,6374,6469,6866,10267,10563	C3AR1,CRH,FPR1,GNG4,CXCL1,CXCL10,CXCL9,PTHLH,SAA1,CCL3,CCL4,CCL13,CCL21,CXCL11,CXCL5,SHH,TAC3,RAMP1,CXCL13
1_Member	GO Biological Processes	GO:2000401	regulation of lymphocyte migration	-4.71404	-2.58527	7/64	3627,6278,6348,6351,6366,10563,387695	CXCL10,S100A7,CCL3,CCL4,CCL21,CXCL13,C10orf99
1_Member	GO Biological Processes	GO:0002690	positive regulation of leukocyte chemotaxis	-4.67501	-2.55181	8/89	719,3569,3627,6278,6348,6351,6366,10563	C3AR1,IL6,CXCL10,S100A7,CCL3,CCL4,CCL21,CXCL13
1_Member	GO Biological Processes	GO:0032103	positive regulation of response to external stimulus	-4.58659	-2.4701	15/325	719,2152,3569,3620,3627,5650,6278,6279,6280,6348,6351,6366,10563,25818,115362	C3AR1,F3,IL6,IDO1,CXCL10,KLK7,S100A7,S100A8,S100A9,CCL3,CCL4,CCL21,CXCL13,KLK5,GBP5
1_Member	GO Biological Processes	GO:0072678	T cell migration	-4.58238	-2.4701	7/67	3627,6278,6348,6366,6373,10563,387695	CXCL10,S100A7,CCL3,CCL21,CXCL11,CXCL13,C10orf99
1_Member	GO Biological Processes	GO:0050920	regulation of chemotaxis	-4.473	-2.39497	12/220	719,1803,2152,3569,3627,6278,6348,6351,6366,10563,26585,57556	C3AR1,DPP4,F3,IL6,CXCL10,S100A7,CCL3,CCL4,CCL21,CXCL13,GREM1,SEMA6A
1_Member	GO Biological Processes	GO:0010819	regulation of T cell chemotaxis	-4.23416	-2.22188	4/17	3627,6278,6366,10563	CXCL10,S100A7,CCL21,CXCL13
1_Member	GO Biological Processes	GO:0050921	positive regulation of chemotaxis	-4.10226	-2.1236	9/137	719,2152,3569,3627,6278,6348,6351,6366,10563	C3AR1,F3,IL6,CXCL10,S100A7,CCL3,CCL4,CCL21,CXCL13
1_Member	GO Biological Processes	GO:0002685	regulation of leukocyte migration	-4.08323	-2.11047	11/205	719,1803,3569,3627,6278,6348,6351,6366,10563,26585,387695	C3AR1,DPP4,IL6,CXCL10,S100A7,CCL3,CCL4,CCL21,CXCL13,GREM1,C10orf99
1_Member	Reactome Gene Sets	R-HSA-418594	G alpha (i) signalling events	-4.02153	-2.06791	16/407	719,2357,2786,2919,3627,4283,6288,6351,6357,6366,6373,6374,8601,10082,10170,10563	C3AR1,FPR1,GNG4,CXCL1,CXCL10,CXCL9,SAA1,CCL4,CCL13,CCL21,CXCL11,CXCL5,RGS20,GPC6,DHRS9,CXCL13
1_Member	Reactome Gene Sets	R-HSA-373076	Class A/1 (Rhodopsin-like receptors)	-3.9864	-1.8874	17/335	152,719,2357,2919,3627,4283,6288,6348,6351,6357,6366,6373,6374,6866,10563,10874,51083	ADRA2C,C3AR1,FPR1,CXCL1,CXCL10,CXCL9,SAA1,CCL3,CCL4,CCL13,CCL21,CXCL11,CXCL5,TAC3,CXCL13,NMU,GAL
1_Member	GO Biological Processes	GO:0048245	eosinophil chemotaxis	-3.85149	-1.94401	4/21	6348,6357,6359,6362	CCL3,CCL13,CCL15,CCL18
1_Member	GO Biological Processes	GO:0071346	cellular response to interferon-gamma	-3.84615	-1.94034	10/182	2209,4360,4502,6348,6351,6357,6359,6362,6366,115362	FCGR1A,MRC1,MT2A,CCL3,CCL4,CCL13,CCL15,CCL18,CCL21,GBP5
1_Member	GO Biological Processes	GO:0030335	positive regulation of cell migration	-3.82339	-1.92464	19/560	719,2152,2335,3569,3627,4318,4920,6278,6317,6348,6351,6366,7130,8877,9982,10563,10631,57556,131578	C3AR1,F3,FN1,IL6,CXCL10,MMP9,ROR2,S100A7,SERPINB3,CCL3,CCL4,CCL21,TNFAIP6,SPHK1,FGFBP1,CXCL13,POSTN,SEMA6A,LRRC15
1_Member	GO Biological Processes	GO:0043408	regulation of MAPK cascade	-3.82215	-1.92464	23/754	1116,2335,2357,3569,4920,6278,6288,6317,6348,6351,6357,6359,6362,6366,6423,6899,8000,8685,8877,10178,10595,26585,57556	CHI3L1,FN1,FPR1,IL6,ROR2,S100A7,SAA1,SERPINB3,CCL3,CCL4,CCL13,CCL15,CCL18,CCL21,SFRP2,TBX1,PSCA,MARCO,SPHK1,TENM1,ERN2,GREM1,SEMA6A
1_Member	GO Biological Processes	GO:0070372	regulation of ERK1 and ERK2 cascade	-3.66664	-1.80542	13/308	1116,2335,4920,6278,6348,6351,6357,6359,6362,6366,8000,8685,57556	CHI3L1,FN1,ROR2,S100A7,CCL3,CCL4,CCL13,CCL15,CCL18,CCL21,PSCA,MARCO,SEMA6A
1_Member	GO Biological Processes	GO:0055074	calcium ion homeostasis	-3.65209	-1.79687	17/484	719,776,844,952,2357,2946,3627,4283,6288,6348,6357,6359,6366,6373,10563,54757,64072	C3AR1,CACNA1D,CASQ1,CD38,FPR1,GSTM2,CXCL10,CXCL9,SAA1,CCL3,CCL13,CCL15,CCL21,CXCL11,CXCL13,FAM20A,CDH23
1_Member	GO Biological Processes	GO:2000147	positive regulation of cell motility	-3.59308	-1.7598	19/584	719,2152,2335,3569,3627,4318,4920,6278,6317,6348,6351,6366,7130,8877,9982,10563,10631,57556,131578	C3AR1,F3,FN1,IL6,CXCL10,MMP9,ROR2,S100A7,SERPINB3,CCL3,CCL4,CCL21,TNFAIP6,SPHK1,FGFBP1,CXCL13,POSTN,SEMA6A,LRRC15
1_Member	GO Biological Processes	GO:2000404	regulation of T cell migration	-3.58894	-1.7598	5/44	3627,6278,6366,10563,387695	CXCL10,S100A7,CCL21,CXCL13,C10orf99
1_Member	GO Biological Processes	GO:0072677	eosinophil migration	-3.54426	-1.73166	4/25	6348,6357,6359,6362	CCL3,CCL13,CCL15,CCL18
1_Member	GO Biological Processes	GO:0034341	response to interferon-gamma	-3.48095	-1.68449	10/202	2209,4360,4502,6348,6351,6357,6359,6362,6366,115362	FCGR1A,MRC1,MT2A,CCL3,CCL4,CCL13,CCL15,CCL18,CCL21,GBP5
1_Member	GO Biological Processes	GO:0051272	positive regulation of cellular component movement	-3.43869	-1.65488	19/601	719,2152,2335,3569,3627,4318,4920,6278,6317,6348,6351,6366,7130,8877,9982,10563,10631,57556,131578	C3AR1,F3,FN1,IL6,CXCL10,MMP9,ROR2,S100A7,SERPINB3,CCL3,CCL4,CCL21,TNFAIP6,SPHK1,FGFBP1,CXCL13,POSTN,SEMA6A,LRRC15
1_Member	GO Biological Processes	GO:0070371	ERK1 and ERK2 cascade	-3.4045	-1.63685	13/328	1116,2335,4920,6278,6348,6351,6357,6359,6362,6366,8000,8685,57556	CHI3L1,FN1,ROR2,S100A7,CCL3,CCL4,CCL13,CCL15,CCL18,CCL21,PSCA,MARCO,SEMA6A
1_Member	GO Biological Processes	GO:0002687	positive regulation of leukocyte migration	-3.40206	-1.63684	8/135	719,3569,3627,6278,6348,6351,6366,10563	C3AR1,IL6,CXCL10,S100A7,CCL3,CCL4,CCL21,CXCL13
1_Member	GO Biological Processes	GO:0051480	regulation of cytosolic calcium ion concentration	-3.38602	-1.62802	14/373	719,776,844,952,2357,2946,3627,4283,6288,6348,6366,6373,10563,64072	C3AR1,CACNA1D,CASQ1,CD38,FPR1,GSTM2,CXCL10,CXCL9,SAA1,CCL3,CCL21,CXCL11,CXCL13,CDH23
1_Member	GO Biological Processes	GO:0007204	positive regulation of cytosolic calcium ion concentration	-3.35477	-1.61709	13/332	719,776,844,952,2357,2946,3627,4283,6288,6348,6366,6373,10563	C3AR1,CACNA1D,CASQ1,CD38,FPR1,GSTM2,CXCL10,CXCL9,SAA1,CCL3,CCL21,CXCL11,CXCL13
1_Member	GO Biological Processes	GO:0040017	positive regulation of locomotion	-3.34242	-1.61103	19/612	719,2152,2335,3569,3627,4318,4920,6278,6317,6348,6351,6366,7130,8877,9982,10563,10631,57556,131578	C3AR1,F3,FN1,IL6,CXCL10,MMP9,ROR2,S100A7,SERPINB3,CCL3,CCL4,CCL21,TNFAIP6,SPHK1,FGFBP1,CXCL13,POSTN,SEMA6A,LRRC15
1_Member	GO Biological Processes	GO:0006874	cellular calcium ion homeostasis	-3.3015	-1.58384	16/472	719,776,844,952,2357,2946,3627,4283,6288,6348,6357,6359,6366,6373,10563,64072	C3AR1,CACNA1D,CASQ1,CD38,FPR1,GSTM2,CXCL10,CXCL9,SAA1,CCL3,CCL13,CCL15,CCL21,CXCL11,CXCL13,CDH23
1_Member	GO Biological Processes	GO:0070374	positive regulation of ERK1 and ERK2 cascade	-3.20592	-1.51623	10/219	1116,4920,6278,6348,6351,6357,6359,6362,6366,8685	CHI3L1,ROR2,S100A7,CCL3,CCL4,CCL13,CCL15,CCL18,CCL21,MARCO
1_Member	GO Biological Processes	GO:2000406	positive regulation of T cell migration	-3.17516	-1.49354	4/31	3627,6278,6366,10563	CXCL10,S100A7,CCL21,CXCL13
1_Member	GO Biological Processes	GO:0043410	positive regulation of MAPK cascade	-3.0091	-1.36394	17/552	1116,2357,3569,4920,6278,6288,6348,6351,6357,6359,6362,6366,6899,8685,8877,10178,10595	CHI3L1,FPR1,IL6,ROR2,S100A7,SAA1,CCL3,CCL4,CCL13,CCL15,CCL18,CCL21,TBX1,MARCO,SPHK1,TENM1,ERN2
1_Member	GO Biological Processes	GO:0010820	positive regulation of T cell chemotaxis	-2.96879	-1.3381	3/16	6278,6366,10563	S100A7,CCL21,CXCL13
1_Member	GO Biological Processes	GO:0070555	response to interleukin-1	-2.77665	-1.19394	9/208	952,1116,3569,6348,6351,6357,6359,6362,6366	CD38,CHI3L1,IL6,CCL3,CCL4,CCL13,CCL15,CCL18,CCL21
1_Member	GO Biological Processes	GO:0071347	cellular response to interleukin-1	-2.59639	-1.06967	8/180	1116,3569,6348,6351,6357,6359,6362,6366	CHI3L1,IL6,CCL3,CCL4,CCL13,CCL15,CCL18,CCL21
2_Summary	GO Biological Processes	GO:0008544	epidermis development	-16.511	-12.493	41/469	646,1515,1824,1825,1830,2069,3229,3624,3846,3852,3853,3854,3860,3861,3887,3909,5266,5275,5650,5744,6278,6424,6469,6700,6703,8796,10083,10481,10855,23581,25818,51083,51806,54474,56603,57822,80736,84189,135228,286887,645027,668,1045,1646,1747,2626,2938,3169,4318,6899,6926,6928,7379,7380,7490,10170,10551,11045,26585,79983,284217,389015,1311,9509,11202	BNC1,CTSV,DSC2,DSC3,DSG3,EREG,HOXC13,INHBA,KRTAP5-9,KRT5,KRT6A,KRT6B,KRT13,KRT14,KRT81,LAMA3,PI3,SERPINB13,KLK7,PTHLH,S100A7,SFRP4,SHH,SPRR2A,SPRR2D,SCEL,USH1C,HOXB13,HPSE,CASP14,KLK5,GAL,CALML5,KRT20,CYP26B1,GRHL3,SLC44A4,SLITRK6,CD109,KRT6C,EVPLL,FOXL2,CDX2,AKR1C2,DLX3,GATA4,GSTA1,FOXA1,MMP9,TBX1,TBX3,HNF1B,UPK2,UPK3A,WT1,DHRS9,AGR2,UPK1A,GREM1,POF1B,LAMA1,SLC9A4,COMP,ADAMTS2,KLK8
2_Member	GO Biological Processes	GO:0008544	epidermis development	-16.511	-12.493	41/469	646,1515,1824,1825,1830,2069,3229,3624,3846,3852,3853,3854,3860,3861,3887,3909,5266,5275,5650,5744,6278,6424,6469,6700,6703,8796,10083,10481,10855,23581,25818,51083,51806,54474,56603,57822,80736,84189,135228,286887,645027	BNC1,CTSV,DSC2,DSC3,DSG3,EREG,HOXC13,INHBA,KRTAP5-9,KRT5,KRT6A,KRT6B,KRT13,KRT14,KRT81,LAMA3,PI3,SERPINB13,KLK7,PTHLH,S100A7,SFRP4,SHH,SPRR2A,SPRR2D,SCEL,USH1C,HOXB13,HPSE,CASP14,KLK5,GAL,CALML5,KRT20,CYP26B1,GRHL3,SLC44A4,SLITRK6,CD109,KRT6C,EVPLL
2_Member	GO Biological Processes	GO:0030855	epithelial cell differentiation	-14.3912	-10.5492	50/786	668,1045,1515,1646,1747,1824,1825,1830,2069,2626,2938,3169,3846,3852,3853,3854,3860,3861,3887,4318,5266,5275,6278,6424,6700,6703,6899,6926,6928,7379,7380,7490,8796,10083,10170,10481,10551,11045,23581,25818,26585,54474,56603,79983,80736,84189,135228,284217,286887,389015	FOXL2,CDX2,CTSV,AKR1C2,DLX3,DSC2,DSC3,DSG3,EREG,GATA4,GSTA1,FOXA1,KRTAP5-9,KRT5,KRT6A,KRT6B,KRT13,KRT14,KRT81,MMP9,PI3,SERPINB13,S100A7,SFRP4,SPRR2A,SPRR2D,TBX1,TBX3,HNF1B,UPK2,UPK3A,WT1,SCEL,USH1C,DHRS9,HOXB13,AGR2,UPK1A,CASP14,KLK5,GREM1,KRT20,CYP26B1,POF1B,SLC44A4,SLITRK6,CD109,LAMA1,KRT6C,SLC9A4
2_Member	GO Biological Processes	GO:0043588	skin development	-11.4121	-8.04722	32/418	1311,1515,1824,1825,1830,2069,3229,3624,3846,3852,3853,3854,3860,3861,3887,5266,5275,6278,6469,6700,6703,8796,9509,10855,23581,25818,51083,54474,56603,57822,135228,286887	COMP,CTSV,DSC2,DSC3,DSG3,EREG,HOXC13,INHBA,KRTAP5-9,KRT5,KRT6A,KRT6B,KRT13,KRT14,KRT81,PI3,SERPINB13,S100A7,SHH,SPRR2A,SPRR2D,SCEL,ADAMTS2,HPSE,CASP14,KLK5,GAL,KRT20,CYP26B1,GRHL3,CD109,KRT6C
2_Member	Reactome Gene Sets	R-HSA-6809371	Formation of the cornified envelope	-10.838	-7.72299	16/130	1824,1825,1830,3852,3853,3854,3861,3887,5266,6700,6703,11202,23581,25818,54474,286887	DSC2,DSC3,DSG3,KRT5,KRT6A,KRT6B,KRT14,KRT81,PI3,SPRR2A,SPRR2D,KLK8,CASP14,KLK5,KRT20,KRT6C
2_Member	GO Biological Processes	GO:0070268	cornification	-10.8365	-7.55883	17/113	1824,1825,1830,3852,3853,3854,3860,3861,3887,5266,6700,6703,23581,25818,54474,56603,286887	DSC2,DSC3,DSG3,KRT5,KRT6A,KRT6B,KRT13,KRT14,KRT81,PI3,SPRR2A,SPRR2D,CASP14,KLK5,KRT20,CYP26B1,KRT6C
2_Member	GO Biological Processes	GO:0009913	epidermal cell differentiation	-10.2097	-7.09467	28/360	1515,1824,1825,1830,2069,3846,3852,3853,3854,3860,3861,3887,5266,5275,6278,6424,6700,6703,8796,10083,23581,25818,54474,56603,80736,84189,135228,286887	CTSV,DSC2,DSC3,DSG3,EREG,KRTAP5-9,KRT5,KRT6A,KRT6B,KRT13,KRT14,KRT81,PI3,SERPINB13,S100A7,SFRP4,SPRR2A,SPRR2D,SCEL,USH1C,CASP14,KLK5,KRT20,CYP26B1,SLC44A4,SLITRK6,CD109,KRT6C
2_Member	GO Biological Processes	GO:0030216	keratinocyte differentiation	-9.26348	-6.32458	21/302	1824,1825,1830,2069,3846,3852,3853,3854,3861,3887,5266,5275,6278,6700,6703,8796,23581,25818,54474,135228,286887	DSC2,DSC3,DSG3,EREG,KRTAP5-9,KRT5,KRT6A,KRT6B,KRT14,KRT81,PI3,SERPINB13,S100A7,SPRR2A,SPRR2D,SCEL,CASP14,KLK5,KRT20,CD109,KRT6C
2_Member	Reactome Gene Sets	R-HSA-6805567	Keratinization	-8.47004	-5.65925	17/214	1824,1825,1830,3846,3852,3853,3854,3861,3887,5266,6700,6703,11202,23581,25818,54474,286887	DSC2,DSC3,DSG3,KRTAP5-9,KRT5,KRT6A,KRT6B,KRT14,KRT81,PI3,SPRR2A,SPRR2D,KLK8,CASP14,KLK5,KRT20,KRT6C
2_Member	GO Biological Processes	GO:0031424	keratinization	-7.32709	-4.76386	16/225	1824,1825,1830,3846,3852,3853,3854,3861,3887,5266,6700,6703,23581,25818,54474,286887	DSC2,DSC3,DSG3,KRTAP5-9,KRT5,KRT6A,KRT6B,KRT14,KRT81,PI3,SPRR2A,SPRR2D,CASP14,KLK5,KRT20,KRT6C
3_Summary	GO Biological Processes	GO:0019730	antimicrobial humoral response	-12.2532	-8.71227	19/123	354,2919,3627,3853,3934,4283,5266,5650,6278,6279,6280,6357,6373,6374,6590,10563,10578,25818,26525,712,713,714,719,3569,11326,1440,2326,3001,3248,3620,4360,4499,6348,7054,10288,54658,54757,56169,80380,115362,151887,387695,57402,1392,1646,3169,3371,3624,6097,6532,6899,56603	KLK3,CXCL1,CXCL10,KRT6A,LCN2,CXCL9,PI3,KLK7,S100A7,S100A8,S100A9,CCL13,CXCL11,CXCL5,SLPI,CXCL13,GNLY,KLK5,IL36RN,C1QA,C1QB,C1QC,C3AR1,IL6,VSIG4,CSF3,FMO1,GZMA,HPGD,IDO1,MRC1,MT1M,CCL3,TH,LILRB2,UGT1A1,FAM20A,GSDMC,PDCD1LG2,GBP5,CCDC80,C10orf99,S100A14,CRH,AKR1C2,FOXA1,TNC,INHBA,RORC,SLC6A4,TBX1,CYP26B1
3_Member	GO Biological Processes	GO:0019730	antimicrobial humoral response	-12.2532	-8.71227	19/123	354,2919,3627,3853,3934,4283,5266,5650,6278,6279,6280,6357,6373,6374,6590,10563,10578,25818,26525	KLK3,CXCL1,CXCL10,KRT6A,LCN2,CXCL9,PI3,KLK7,S100A7,S100A8,S100A9,CCL13,CXCL11,CXCL5,SLPI,CXCL13,GNLY,KLK5,IL36RN
3_Member	GO Biological Processes	GO:0061844	antimicrobial humoral immune response mediated by antimicrobial peptide	-10.9945	-7.85152	13/73	2919,3627,3853,4283,5650,6278,6280,6357,6373,6374,10563,10578,25818	CXCL1,CXCL10,KRT6A,CXCL9,KLK7,S100A7,S100A9,CCL13,CXCL11,CXCL5,CXCL13,GNLY,KLK5
3_Member	GO Biological Processes	GO:0006959	humoral immune response	-8.14479	-5.30281	25/361	354,712,713,714,719,2919,3569,3627,3853,3934,4283,5266,5650,6278,6279,6280,6357,6373,6374,6590,10563,10578,11326,25818,26525	KLK3,C1QA,C1QB,C1QC,C3AR1,CXCL1,IL6,CXCL10,KRT6A,LCN2,CXCL9,PI3,KLK7,S100A7,S100A8,S100A9,CCL13,CXCL11,CXCL5,SLPI,CXCL13,GNLY,VSIG4,KLK5,IL36RN
3_Member	GO Biological Processes	GO:0009617	response to bacterium	-8.07426	-5.39861	31/729	1440,2326,2919,3001,3248,3569,3620,3627,3853,4283,4360,4499,5650,6278,6279,6280,6348,6373,6374,7054,10288,10563,10578,25818,54658,54757,56169,80380,115362,151887,387695	CSF3,FMO1,CXCL1,GZMA,HPGD,IL6,IDO1,CXCL10,KRT6A,CXCL9,MRC1,MT1M,KLK7,S100A7,S100A8,S100A9,CCL3,CXCL11,CXCL5,TH,LILRB2,CXCL13,GNLY,KLK5,UGT1A1,FAM20A,GSDMC,PDCD1LG2,GBP5,CCDC80,C10orf99
3_Member	GO Biological Processes	GO:0032496	response to lipopolysaccharide	-7.39918	-4.65986	23/338	1440,2326,2919,3248,3569,3620,3627,3934,4283,4360,6278,6279,6348,6373,6374,6590,7054,10288,10563,26525,54658,57402,80380	CSF3,FMO1,CXCL1,HPGD,IL6,IDO1,CXCL10,LCN2,CXCL9,MRC1,S100A7,S100A8,CCL3,CXCL11,CXCL5,SLPI,TH,LILRB2,CXCL13,IL36RN,UGT1A1,S100A14,PDCD1LG2
3_Member	GO Biological Processes	GO:0002237	response to molecule of bacterial origin	-6.94593	-4.30807	23/358	1440,2326,2919,3248,3569,3620,3627,3934,4283,4360,6278,6279,6348,6373,6374,6590,7054,10288,10563,26525,54658,57402,80380	CSF3,FMO1,CXCL1,HPGD,IL6,IDO1,CXCL10,LCN2,CXCL9,MRC1,S100A7,S100A8,CCL3,CXCL11,CXCL5,SLPI,TH,LILRB2,CXCL13,IL36RN,UGT1A1,S100A14,PDCD1LG2
3_Member	GO Biological Processes	GO:0071222	cellular response to lipopolysaccharide	-4.63116	-2.51071	12/212	1440,2919,3569,3627,4283,4360,6348,6373,6374,10288,10563,80380	CSF3,CXCL1,IL6,CXCL10,CXCL9,MRC1,CCL3,CXCL11,CXCL5,LILRB2,CXCL13,PDCD1LG2
3_Member	GO Biological Processes	GO:0071219	cellular response to molecule of bacterial origin	-4.37787	-2.32593	12/225	1440,2919,3569,3627,4283,4360,6348,6373,6374,10288,10563,80380	CSF3,CXCL1,IL6,CXCL10,CXCL9,MRC1,CCL3,CXCL11,CXCL5,LILRB2,CXCL13,PDCD1LG2
3_Member	GO Biological Processes	GO:0071216	cellular response to biotic stimulus	-3.95677	-2.01594	12/249	1440,2919,3569,3627,4283,4360,6348,6373,6374,10288,10563,80380	CSF3,CXCL1,IL6,CXCL10,CXCL9,MRC1,CCL3,CXCL11,CXCL5,LILRB2,CXCL13,PDCD1LG2
3_Member	GO Biological Processes	GO:0071396	cellular response to lipid	-3.5742	-1.59356	24/616	1392,1440,1646,2919,3169,3371,3569,3624,3627,3934,4283,4360,6097,6348,6373,6374,6532,6899,10288,10563,26525,54658,56603,80380	CRH,CSF3,AKR1C2,CXCL1,FOXA1,TNC,IL6,INHBA,CXCL10,LCN2,CXCL9,MRC1,RORC,CCL3,CXCL11,CXCL5,SLC6A4,TBX1,LILRB2,CXCL13,IL36RN,UGT1A1,CYP26B1,PDCD1LG2
3_Member	GO Biological Processes	GO:0042742	defense response to bacterium	-2.90681	-1.08739	15/344	354,3569,3853,3934,5650,6278,6279,6280,6590,10563,10578,25818,56169,57402,387695	KLK3,IL6,KRT6A,LCN2,KLK7,S100A7,S100A8,S100A9,SLPI,CXCL13,GNLY,KLK5,GSDMC,S100A14,C10orf99
4_Summary	GO Biological Processes	GO:0030198	extracellular matrix organization	-11.999	-8.52502	31/373	1300,1301,1311,1515,1803,1805,2191,2201,2335,3371,3569,3909,4241,4314,4316,4318,5650,6423,7045,7490,8076,8728,9509,10631,23213,25818,26585,55959,84290,151887,284217,2202,10753,26577,92291,136227,388743,7130,8839,54084,84624,115908,343637	COL10A1,COL11A1,COMP,CTSV,DPP4,DPT,FAP,FBN2,FN1,TNC,IL6,LAMA3,MELTF,MMP3,MMP7,MMP9,KLK7,SFRP2,TGFBI,WT1,MFAP5,ADAM19,ADAMTS2,POSTN,SULF1,KLK5,GREM1,SULF2,CAPNS2,CCDC80,LAMA1,EFEMP1,CAPN9,PCOLCE2,CAPN13,COL26A1,CAPN8,TNFAIP6,CCN5,TSPEAR,FNDC1,CTHRC1,RSPO4
4_Member	GO Biological Processes	GO:0030198	extracellular matrix organization	-11.999	-8.52502	31/373	1300,1301,1311,1515,1803,1805,2191,2201,2335,3371,3569,3909,4241,4314,4316,4318,5650,6423,7045,7490,8076,8728,9509,10631,23213,25818,26585,55959,84290,151887,284217	COL10A1,COL11A1,COMP,CTSV,DPP4,DPT,FAP,FBN2,FN1,TNC,IL6,LAMA3,MELTF,MMP3,MMP7,MMP9,KLK7,SFRP2,TGFBI,WT1,MFAP5,ADAM19,ADAMTS2,POSTN,SULF1,KLK5,GREM1,SULF2,CAPNS2,CCDC80,LAMA1
4_Member	GO Biological Processes	GO:0043062	extracellular structure organization	-10.4322	-7.28921	31/429	1300,1301,1311,1515,1803,1805,2191,2201,2335,3371,3569,3909,4241,4314,4316,4318,5650,6423,7045,7490,8076,8728,9509,10631,23213,25818,26585,55959,84290,151887,284217	COL10A1,COL11A1,COMP,CTSV,DPP4,DPT,FAP,FBN2,FN1,TNC,IL6,LAMA3,MELTF,MMP3,MMP7,MMP9,KLK7,SFRP2,TGFBI,WT1,MFAP5,ADAM19,ADAMTS2,POSTN,SULF1,KLK5,GREM1,SULF2,CAPNS2,CCDC80,LAMA1
4_Member	Reactome Gene Sets	R-HSA-1474244	Extracellular matrix organization	-8.34022	-5.48351	23/301	1300,1301,1311,1515,2201,2202,2335,3371,3909,4314,4316,4318,5650,8076,8728,9509,10753,26577,84290,92291,136227,284217,388743	COL10A1,COL11A1,COMP,CTSV,FBN2,EFEMP1,FN1,TNC,LAMA3,MMP3,MMP7,MMP9,KLK7,MFAP5,ADAM19,ADAMTS2,CAPN9,PCOLCE2,CAPNS2,CAPN13,COL26A1,LAMA1,CAPN8
4_Member	Canonical Pathways	M3008	NABA ECM GLYCOPROTEINS	-7.87821	-5.06425	18/196	1311,1805,2201,2202,2335,3371,3909,7045,7130,8076,8839,10631,26577,54084,84624,115908,284217,343637	COMP,DPT,FBN2,EFEMP1,FN1,TNC,LAMA3,TGFBI,TNFAIP6,MFAP5,CCN5,POSTN,PCOLCE2,TSPEAR,FNDC1,CTHRC1,LAMA1,RSPO4
4_Member	Canonical Pathways	M5884	NABA CORE MATRISOME	-7.6614	-4.86081	21/275	1300,1301,1311,1805,2201,2202,2335,3371,3909,7045,7130,8076,8839,10631,26577,54084,84624,115908,136227,284217,343637	COL10A1,COL11A1,COMP,DPT,FBN2,EFEMP1,FN1,TNC,LAMA3,TGFBI,TNFAIP6,MFAP5,CCN5,POSTN,PCOLCE2,TSPEAR,FNDC1,CTHRC1,COL26A1,LAMA1,RSPO4
4_Member	Reactome Gene Sets	R-HSA-1474228	Degradation of the extracellular matrix	-7.55805	-4.79525	15/140	1300,1301,1515,2201,2335,3909,4314,4316,4318,5650,10753,84290,92291,136227,388743	COL10A1,COL11A1,CTSV,FBN2,FN1,LAMA3,MMP3,MMP7,MMP9,KLK7,CAPN9,CAPNS2,CAPN13,COL26A1,CAPN8
5_Summary	Canonical Pathways	M3468	NABA ECM REGULATORS	-10.3041	-7.26374	20/238	12,1510,4314,4316,4318,5055,5265,5266,5275,6317,6318,8710,8728,9509,10855,23213,54757,55959,94031,135228,668,2152,2335,4102,5918,6279,6280,6423,6590,6690,7980,9447,23581,26577,27344,340485,2619,6469,11326,3001,81706,440503	SERPINA3,CTSE,MMP3,MMP7,MMP9,SERPINB2,SERPINA1,PI3,SERPINB13,SERPINB3,SERPINB4,SERPINB7,ADAM19,ADAMTS2,HPSE,SULF1,FAM20A,SULF2,HTRA3,CD109,FOXL2,F3,FN1,MAGEA3,RARRES1,S100A8,S100A9,SFRP2,SLPI,SPINK1,TFPI2,AIM2,CASP14,PCOLCE2,PCSK1N,ACER2,GAS1,SHH,VSIG4,GZMA,PPP1R14C,PLIN5
5_Member	Canonical Pathways	M3468	NABA ECM REGULATORS	-10.3041	-7.26374	20/238	12,1510,4314,4316,4318,5055,5265,5266,5275,6317,6318,8710,8728,9509,10855,23213,54757,55959,94031,135228	SERPINA3,CTSE,MMP3,MMP7,MMP9,SERPINB2,SERPINA1,PI3,SERPINB13,SERPINB3,SERPINB4,SERPINB7,ADAM19,ADAMTS2,HPSE,SULF1,FAM20A,SULF2,HTRA3,CD109
5_Member	GO Biological Processes	GO:0052547	regulation of peptidase activity	-6.67427	-4.09553	26/460	12,668,2152,2335,4102,4318,5055,5265,5266,5275,5918,6279,6280,6317,6318,6423,6590,6690,7980,8710,9447,23581,26577,27344,135228,340485	SERPINA3,FOXL2,F3,FN1,MAGEA3,MMP9,SERPINB2,SERPINA1,PI3,SERPINB13,RARRES1,S100A8,S100A9,SERPINB3,SERPINB4,SFRP2,SLPI,SPINK1,TFPI2,SERPINB7,AIM2,CASP14,PCOLCE2,PCSK1N,CD109,ACER2
5_Member	GO Biological Processes	GO:0052548	regulation of endopeptidase activity	-6.12538	-3.60562	24/429	12,668,2152,4102,4318,5055,5265,5266,5275,5918,6279,6280,6317,6318,6423,6590,6690,7980,8710,9447,23581,27344,135228,340485	SERPINA3,FOXL2,F3,MAGEA3,MMP9,SERPINB2,SERPINA1,PI3,SERPINB13,RARRES1,S100A8,S100A9,SERPINB3,SERPINB4,SFRP2,SLPI,SPINK1,TFPI2,SERPINB7,AIM2,CASP14,PCSK1N,CD109,ACER2
5_Member	GO Biological Processes	GO:0010951	negative regulation of endopeptidase activity	-5.54958	-3.13356	17/253	12,4102,4318,5055,5265,5266,5275,5918,6317,6318,6423,6590,6690,7980,8710,27344,135228	SERPINA3,MAGEA3,MMP9,SERPINB2,SERPINA1,PI3,SERPINB13,RARRES1,SERPINB3,SERPINB4,SFRP2,SLPI,SPINK1,TFPI2,SERPINB7,PCSK1N,CD109
5_Member	GO Biological Processes	GO:0010466	negative regulation of peptidase activity	-5.25805	-2.89319	17/266	12,4102,4318,5055,5265,5266,5275,5918,6317,6318,6423,6590,6690,7980,8710,27344,135228	SERPINA3,MAGEA3,MMP9,SERPINB2,SERPINA1,PI3,SERPINB13,RARRES1,SERPINB3,SERPINB4,SFRP2,SLPI,SPINK1,TFPI2,SERPINB7,PCSK1N,CD109
5_Member	GO Biological Processes	GO:0045861	negative regulation of proteolysis	-5.01658	-2.71335	20/368	12,2619,4102,4318,5055,5265,5266,5275,5918,6317,6318,6423,6469,6590,6690,7980,8710,11326,27344,135228	SERPINA3,GAS1,MAGEA3,MMP9,SERPINB2,SERPINA1,PI3,SERPINB13,RARRES1,SERPINB3,SERPINB4,SFRP2,SHH,SLPI,SPINK1,TFPI2,SERPINB7,VSIG4,PCSK1N,CD109
5_Member	GO Biological Processes	GO:0051346	negative regulation of hydrolase activity	-3.55146	-1.5728	20/470	12,3001,4102,4318,5055,5265,5266,5275,5918,6317,6318,6423,6590,6690,7980,8710,27344,81706,135228,440503	SERPINA3,GZMA,MAGEA3,MMP9,SERPINB2,SERPINA1,PI3,SERPINB13,RARRES1,SERPINB3,SERPINB4,SFRP2,SLPI,SPINK1,TFPI2,SERPINB7,PCSK1N,PPP1R14C,CD109,PLIN5
6_Summary	GO Biological Processes	GO:0048598	embryonic morphogenesis	-9.7437	-6.70335	36/600	525,668,1301,2201,2202,2335,2626,3221,3225,3226,3227,3239,3624,3909,4318,4920,5396,6423,6469,6899,6926,6928,7054,7545,8091,10083,23213,25806,26585,50515,56603,57822,80736,84189,115908,341640,713,5816,64072,3229,7490,284217,776,54084,712	ATP6V1B1,FOXL2,COL11A1,FBN2,EFEMP1,FN1,GATA4,HOXC4,HOXC9,HOXC10,HOXC11,HOXD13,INHBA,LAMA3,MMP9,ROR2,PRRX1,SFRP2,SHH,TBX1,TBX3,HNF1B,TH,ZIC1,HMGA2,USH1C,SULF1,VAX2,GREM1,CHST11,CYP26B1,GRHL3,SLC44A4,SLITRK6,CTHRC1,FREM2,C1QB,PVALB,CDH23,HOXC13,WT1,LAMA1,CACNA1D,TSPEAR,C1QA
6_Member	GO Biological Processes	GO:0048598	embryonic morphogenesis	-9.7437	-6.70335	36/600	525,668,1301,2201,2202,2335,2626,3221,3225,3226,3227,3239,3624,3909,4318,4920,5396,6423,6469,6899,6926,6928,7054,7545,8091,10083,23213,25806,26585,50515,56603,57822,80736,84189,115908,341640	ATP6V1B1,FOXL2,COL11A1,FBN2,EFEMP1,FN1,GATA4,HOXC4,HOXC9,HOXC10,HOXC11,HOXD13,INHBA,LAMA3,MMP9,ROR2,PRRX1,SFRP2,SHH,TBX1,TBX3,HNF1B,TH,ZIC1,HMGA2,USH1C,SULF1,VAX2,GREM1,CHST11,CYP26B1,GRHL3,SLC44A4,SLITRK6,CTHRC1,FREM2
6_Member	GO Biological Processes	GO:0048562	embryonic organ morphogenesis	-9.07621	-6.09953	24/300	525,668,1301,2201,2202,2626,3221,3225,3227,4920,5396,6469,6899,6926,6928,7054,7545,10083,25806,50515,57822,80736,84189,115908	ATP6V1B1,FOXL2,COL11A1,FBN2,EFEMP1,GATA4,HOXC4,HOXC9,HOXC11,ROR2,PRRX1,SHH,TBX1,TBX3,HNF1B,TH,ZIC1,USH1C,VAX2,CHST11,GRHL3,SLC44A4,SLITRK6,CTHRC1
6_Member	GO Biological Processes	GO:0048839	inner ear development	-6.33795	-3.797	16/197	525,713,1301,4920,5396,5816,6469,6899,7545,10083,57822,64072,80736,84189,115908,341640	ATP6V1B1,C1QB,COL11A1,ROR2,PRRX1,PVALB,SHH,TBX1,ZIC1,USH1C,GRHL3,CDH23,SLC44A4,SLITRK6,CTHRC1,FREM2
6_Member	GO Biological Processes	GO:0090596	sensory organ morphogenesis	-5.95556	-3.44937	18/263	525,668,1301,2201,2202,3229,4920,5396,6899,7054,7545,10083,25806,56603,57822,80736,84189,115908	ATP6V1B1,FOXL2,COL11A1,FBN2,EFEMP1,HOXC13,ROR2,PRRX1,TBX1,TH,ZIC1,USH1C,VAX2,CYP26B1,GRHL3,SLC44A4,SLITRK6,CTHRC1
6_Member	GO Biological Processes	GO:0042472	inner ear morphogenesis	-5.68745	-3.23758	11/103	525,1301,4920,5396,6899,7545,10083,57822,80736,84189,115908	ATP6V1B1,COL11A1,ROR2,PRRX1,TBX1,ZIC1,USH1C,GRHL3,SLC44A4,SLITRK6,CTHRC1
6_Member	GO Biological Processes	GO:0043583	ear development	-5.59934	-3.16672	16/224	525,713,1301,4920,5396,5816,6469,6899,7545,10083,57822,64072,80736,84189,115908,341640	ATP6V1B1,C1QB,COL11A1,ROR2,PRRX1,PVALB,SHH,TBX1,ZIC1,USH1C,GRHL3,CDH23,SLC44A4,SLITRK6,CTHRC1,FREM2
6_Member	GO Biological Processes	GO:0007423	sensory organ development	-5.17899	-2.83761	26/554	525,668,713,1301,2201,2202,3229,3624,4920,5396,5816,6469,6899,7054,7490,7545,10083,25806,56603,57822,64072,80736,84189,115908,284217,341640	ATP6V1B1,FOXL2,C1QB,COL11A1,FBN2,EFEMP1,HOXC13,INHBA,ROR2,PRRX1,PVALB,SHH,TBX1,TH,WT1,ZIC1,USH1C,VAX2,CYP26B1,GRHL3,CDH23,SLC44A4,SLITRK6,CTHRC1,LAMA1,FREM2
6_Member	GO Biological Processes	GO:0042471	ear morphogenesis	-4.93584	-2.64612	11/123	525,1301,4920,5396,6899,7545,10083,57822,80736,84189,115908	ATP6V1B1,COL11A1,ROR2,PRRX1,TBX1,ZIC1,USH1C,GRHL3,SLC44A4,SLITRK6,CTHRC1
6_Member	GO Biological Processes	GO:0007605	sensory perception of sound	-2.85662	-1.05471	9/150	525,776,1301,6899,7054,10083,54084,64072,84189	ATP6V1B1,CACNA1D,COL11A1,TBX1,TH,USH1C,TSPEAR,CDH23,SLITRK6
6_Member	GO Biological Processes	GO:0048880	sensory system development	-2.60061	-0.873683	15/370	668,712,2201,2202,3624,6469,7054,7490,10083,25806,57822,80736,84189,284217,341640	FOXL2,C1QA,FBN2,EFEMP1,INHBA,SHH,TH,WT1,USH1C,VAX2,GRHL3,SLC44A4,SLITRK6,LAMA1,FREM2
6_Member	GO Biological Processes	GO:0050954	sensory perception of mechanical stimulus	-2.4872	-0.789707	9/170	525,776,1301,6899,7054,10083,54084,64072,84189	ATP6V1B1,CACNA1D,COL11A1,TBX1,TH,USH1C,TSPEAR,CDH23,SLITRK6
6_Member	GO Biological Processes	GO:0043010	camera-type eye development	-2.02433	-0.440022	12/311	668,2201,2202,3624,6469,7054,7490,10083,25806,57822,84189,284217	FOXL2,FBN2,EFEMP1,INHBA,SHH,TH,WT1,USH1C,VAX2,GRHL3,SLITRK6,LAMA1
7_Summary	GO Biological Processes	GO:0001501	skeletal system development	-9.39959	-6.40271	33/529	651,1116,1300,1301,1311,2201,2202,3221,3223,3224,3225,3226,3227,3239,4318,4920,5396,5744,6423,6424,6469,6899,6926,7045,8091,23213,25884,26585,50515,55959,56603,144347,284266,2297,3169,8710,1045,1825,3294,4010,6928,8796,57822,60482,64711,115908,196051	BMP3,CHI3L1,COL10A1,COL11A1,COMP,FBN2,EFEMP1,HOXC4,HOXC6,HOXC8,HOXC9,HOXC10,HOXC11,HOXD13,MMP9,ROR2,PRRX1,PTHLH,SFRP2,SFRP4,SHH,TBX1,TBX3,TGFBI,HMGA2,SULF1,CHRDL2,GREM1,CHST11,SULF2,CYP26B1,RFLNA,SIGLEC15,FOXD1,FOXA1,SERPINB7,CDX2,DSC3,HSD17B2,LMX1B,HNF1B,SCEL,GRHL3,SLC5A7,HS3ST6,CTHRC1,PLPP4
7_Member	GO Biological Processes	GO:0001501	skeletal system development	-9.39959	-6.40271	33/529	651,1116,1300,1301,1311,2201,2202,3221,3223,3224,3225,3226,3227,3239,4318,4920,5396,5744,6423,6424,6469,6899,6926,7045,8091,23213,25884,26585,50515,55959,56603,144347,284266	BMP3,CHI3L1,COL10A1,COL11A1,COMP,FBN2,EFEMP1,HOXC4,HOXC6,HOXC8,HOXC9,HOXC10,HOXC11,HOXD13,MMP9,ROR2,PRRX1,PTHLH,SFRP2,SFRP4,SHH,TBX1,TBX3,TGFBI,HMGA2,SULF1,CHRDL2,GREM1,CHST11,SULF2,CYP26B1,RFLNA,SIGLEC15
7_Member	GO Biological Processes	GO:0061448	connective tissue development	-9.10531	-6.21756	20/278	651,1116,1301,1311,2202,2297,3169,4920,5396,5744,6423,7045,8091,8710,23213,25884,26585,50515,55959,144347	BMP3,CHI3L1,COL11A1,COMP,EFEMP1,FOXD1,FOXA1,ROR2,PRRX1,PTHLH,SFRP2,TGFBI,HMGA2,SERPINB7,SULF1,CHRDL2,GREM1,CHST11,SULF2,RFLNA
7_Member	GO Biological Processes	GO:0051216	cartilage development	-8.53196	-5.70422	17/212	651,1116,1301,1311,2202,4920,5396,5744,6423,7045,8091,23213,25884,26585,50515,55959,144347	BMP3,CHI3L1,COL11A1,COMP,EFEMP1,ROR2,PRRX1,PTHLH,SFRP2,TGFBI,HMGA2,SULF1,CHRDL2,GREM1,CHST11,SULF2,RFLNA
7_Member	GO Biological Processes	GO:0002062	chondrocyte differentiation	-7.08607	-4.54512	12/124	1301,1311,2202,5744,6423,7045,8091,23213,26585,50515,55959,144347	COL11A1,COMP,EFEMP1,PTHLH,SFRP2,TGFBI,HMGA2,SULF1,GREM1,CHST11,SULF2,RFLNA
7_Member	GO Biological Processes	GO:0002063	chondrocyte development	-6.74692	-4.29704	8/48	1301,1311,5744,6423,23213,50515,55959,144347	COL11A1,COMP,PTHLH,SFRP2,SULF1,CHST11,SULF2,RFLNA
7_Member	GO Biological Processes	GO:0048705	skeletal system morphogenesis	-5.21466	-2.86195	16/240	1301,1311,2201,3221,3224,3225,3227,4920,5396,6423,6424,6899,26585,50515,56603,144347	COL11A1,COMP,FBN2,HOXC4,HOXC8,HOXC9,HOXC11,ROR2,PRRX1,SFRP2,SFRP4,TBX1,GREM1,CHST11,CYP26B1,RFLNA
7_Member	GO Biological Processes	GO:0048706	embryonic skeletal system development	-4.7715	-2.51812	11/128	1301,3221,3223,3225,3227,5396,6469,6899,23213,50515,55959	COL11A1,HOXC4,HOXC6,HOXC9,HOXC11,PRRX1,SHH,TBX1,SULF1,CHST11,SULF2
7_Member	GO Biological Processes	GO:0009792	embryo development ending in birth or egg hatching	-3.86015	-1.79147	26/664	1045,1301,1825,3169,3221,3223,3225,3227,3294,4010,4920,5396,6423,6469,6899,6926,6928,8796,23213,50515,55959,57822,60482,64711,115908,196051	CDX2,COL11A1,DSC3,FOXA1,HOXC4,HOXC6,HOXC9,HOXC11,HSD17B2,LMX1B,ROR2,PRRX1,SFRP2,SHH,TBX1,TBX3,HNF1B,SCEL,SULF1,CHST11,SULF2,GRHL3,SLC5A7,HS3ST6,CTHRC1,PLPP4
7_Member	GO Biological Processes	GO:0043009	chordate embryonic development	-3.65579	-1.64631	25/646	1045,1301,1825,3169,3221,3223,3225,3227,3294,4010,4920,5396,6423,6469,6899,6926,6928,23213,50515,55959,57822,60482,64711,115908,196051	CDX2,COL11A1,DSC3,FOXA1,HOXC4,HOXC6,HOXC9,HOXC11,HSD17B2,LMX1B,ROR2,PRRX1,SFRP2,SHH,TBX1,TBX3,HNF1B,SULF1,CHST11,SULF2,GRHL3,SLC5A7,HS3ST6,CTHRC1,PLPP4
8_Summary	GO Biological Processes	GO:0007389	pattern specification process	-9.02462	-6.15267	14/446	1045,2626,3221,3223,3224,3225,3226,3227,3229,4010,6899,7545,25806,50805,712,2018,2297,3169,3237,3239,4920,6423,6469,6926,6928,7490,26585,56603,525,668,2020,10083	CDX2,GATA4,HOXC4,HOXC6,HOXC8,HOXC9,HOXC10,HOXC11,HOXC13,LMX1B,TBX1,ZIC1,VAX2,IRX4,C1QA,EMX2,FOXD1,FOXA1,HOXD11,HOXD13,ROR2,SFRP2,SHH,TBX3,HNF1B,WT1,GREM1,CYP26B1,ATP6V1B1,FOXL2,EN2,USH1C
8_Member	GO Biological Processes	GO:0007389	pattern specification process	-9.02462	-6.15267	14/446	1045,2626,3221,3223,3224,3225,3226,3227,3229,4010,6899,7545,25806,50805	CDX2,GATA4,HOXC4,HOXC6,HOXC8,HOXC9,HOXC10,HOXC11,HOXC13,LMX1B,TBX1,ZIC1,VAX2,IRX4
8_Member	GO Biological Processes	GO:0003002	regionalization	-8.98573	-6.06457	26/354	712,1045,2018,2297,2626,3169,3221,3223,3224,3225,3226,3227,3229,3237,3239,4010,4920,6423,6469,6899,6926,6928,7490,25806,26585,56603	C1QA,CDX2,EMX2,FOXD1,GATA4,FOXA1,HOXC4,HOXC6,HOXC8,HOXC9,HOXC10,HOXC11,HOXC13,HOXD11,HOXD13,LMX1B,ROR2,SFRP2,SHH,TBX1,TBX3,HNF1B,WT1,VAX2,GREM1,CYP26B1
8_Member	GO Biological Processes	GO:0009952	anterior/posterior pattern specification	-8.09898	-5.41335	10/218	1045,2626,3221,3223,3224,3225,3226,3227,3229,6899	CDX2,GATA4,HOXC4,HOXC6,HOXC8,HOXC9,HOXC10,HOXC11,HOXC13,TBX1
8_Member	GO Biological Processes	GO:0048568	embryonic organ development	-7.06111	-4.52733	12/445	525,668,1045,2020,2626,3221,3225,3227,6899,7545,10083,25806	ATP6V1B1,FOXL2,CDX2,EN2,GATA4,HOXC4,HOXC9,HOXC11,TBX1,ZIC1,USH1C,VAX2
8_Member	GO Biological Processes	GO:0009954	proximal/distal pattern formation	-3.61352	-1.77212	3/33	3225,3226,3227	HOXC9,HOXC10,HOXC11
8_Member	GO Biological Processes	GO:0048704	embryonic skeletal system morphogenesis	-3.35492	-1.61709	4/96	3221,3225,3227,6899	HOXC4,HOXC9,HOXC11,TBX1
9_Summary	GO Biological Processes	GO:0010817	regulation of hormone levels	-8.64186	-5.76991	32/537	130,152,668,776,952,1392,1577,1646,1803,2297,3169,3294,3569,3624,5653,6469,6566,6926,6928,7447,10170,10202,10874,27344,51083,54097,54658,56603,60482,80736,131177,389434,6623,90019,1116,1311,2335,6279,6288,6348,9447,10631,26525,51311,54474,115362,6532,8529,8911	ADH6,ADRA2C,FOXL2,CACNA1D,CD38,CRH,CYP3A5,AKR1C2,DPP4,FOXD1,FOXA1,HSD17B2,IL6,INHBA,KLK6,SHH,SLC16A1,TBX3,HNF1B,VSNL1,DHRS9,DHRS2,NMU,PCSK1N,GAL,FAM3B,UGT1A1,CYP26B1,SLC5A7,SLC44A4,FAM3D,IYD,SNCG,SYT8,CHI3L1,COMP,FN1,S100A8,SAA1,CCL3,AIM2,POSTN,IL36RN,TLR8,KRT20,GBP5,SLC6A4,CYP4F2,CACNA1I
9_Member	GO Biological Processes	GO:0010817	regulation of hormone levels	-8.64186	-5.76991	32/537	130,152,668,776,952,1392,1577,1646,1803,2297,3169,3294,3569,3624,5653,6469,6566,6926,6928,7447,10170,10202,10874,27344,51083,54097,54658,56603,60482,80736,131177,389434	ADH6,ADRA2C,FOXL2,CACNA1D,CD38,CRH,CYP3A5,AKR1C2,DPP4,FOXD1,FOXA1,HSD17B2,IL6,INHBA,KLK6,SHH,SLC16A1,TBX3,HNF1B,VSNL1,DHRS9,DHRS2,NMU,PCSK1N,GAL,FAM3B,UGT1A1,CYP26B1,SLC5A7,SLC44A4,FAM3D,IYD
9_Member	GO Biological Processes	GO:0046879	hormone secretion	-4.84505	-2.57516	18/316	152,668,776,952,1392,1803,2297,3569,3624,6566,6926,6928,7447,10874,51083,54097,80736,131177	ADRA2C,FOXL2,CACNA1D,CD38,CRH,DPP4,FOXD1,IL6,INHBA,SLC16A1,TBX3,HNF1B,VSNL1,NMU,GAL,FAM3B,SLC44A4,FAM3D
9_Member	GO Biological Processes	GO:0009914	hormone transport	-4.69983	-2.4526	18/324	152,668,776,952,1392,1803,2297,3569,3624,6566,6926,6928,7447,10874,51083,54097,80736,131177	ADRA2C,FOXL2,CACNA1D,CD38,CRH,DPP4,FOXD1,IL6,INHBA,SLC16A1,TBX3,HNF1B,VSNL1,NMU,GAL,FAM3B,SLC44A4,FAM3D
9_Member	GO Biological Processes	GO:0023061	signal release	-4.03038	-1.91268	21/467	152,668,776,952,1392,1803,2297,3569,3624,6566,6623,6926,6928,7447,10874,51083,54097,60482,80736,90019,131177	ADRA2C,FOXL2,CACNA1D,CD38,CRH,DPP4,FOXD1,IL6,INHBA,SLC16A1,SNCG,TBX3,HNF1B,VSNL1,NMU,GAL,FAM3B,SLC5A7,SLC44A4,SYT8,FAM3D
9_Member	GO Biological Processes	GO:0002790	peptide secretion	-4.0183	-1.90871	26/649	152,776,952,1116,1311,1392,1803,2335,3569,6279,6288,6348,6566,6623,6928,7447,9447,10631,10874,26525,51083,51311,54097,54474,115362,131177	ADRA2C,CACNA1D,CD38,CHI3L1,COMP,CRH,DPP4,FN1,IL6,S100A8,SAA1,CCL3,SLC16A1,SNCG,HNF1B,VSNL1,AIM2,POSTN,NMU,IL36RN,GAL,TLR8,FAM3B,KRT20,GBP5,FAM3D
9_Member	GO Biological Processes	GO:0009306	protein secretion	-3.99456	-1.89294	25/614	152,776,952,1116,1311,1392,1803,2335,3569,6288,6348,6566,6623,6928,7447,9447,10631,10874,26525,51083,51311,54097,54474,115362,131177	ADRA2C,CACNA1D,CD38,CHI3L1,COMP,CRH,DPP4,FN1,IL6,SAA1,CCL3,SLC16A1,SNCG,HNF1B,VSNL1,AIM2,POSTN,NMU,IL36RN,GAL,TLR8,FAM3B,KRT20,GBP5,FAM3D
9_Member	GO Biological Processes	GO:0030072	peptide hormone secretion	-3.23215	-1.32361	13/253	152,776,952,1392,1803,3569,6566,6928,7447,10874,51083,54097,131177	ADRA2C,CACNA1D,CD38,CRH,DPP4,IL6,SLC16A1,HNF1B,VSNL1,NMU,GAL,FAM3B,FAM3D
9_Member	GO Biological Processes	GO:0051047	positive regulation of secretion	-3.10104	-1.22473	18/436	668,776,952,1392,3569,3624,6279,6288,6348,6532,7447,8529,8911,9447,10631,10874,51083,51311	FOXL2,CACNA1D,CD38,CRH,IL6,INHBA,S100A8,SAA1,CCL3,SLC6A4,VSNL1,CYP4F2,CACNA1I,AIM2,POSTN,NMU,GAL,TLR8
9_Member	GO Biological Processes	GO:0030073	insulin secretion	-2.91901	-1.09744	11/208	152,776,952,1392,1803,6566,6928,7447,51083,54097,131177	ADRA2C,CACNA1D,CD38,CRH,DPP4,SLC16A1,HNF1B,VSNL1,GAL,FAM3B,FAM3D
9_Member	GO Biological Processes	GO:0002791	regulation of peptide secretion	-2.62931	-0.886876	19/520	152,776,952,1392,1803,2335,3569,6279,6288,6348,6566,7447,9447,10631,10874,26525,51311,54474,131177	ADRA2C,CACNA1D,CD38,CRH,DPP4,FN1,IL6,S100A8,SAA1,CCL3,SLC16A1,VSNL1,AIM2,POSTN,NMU,IL36RN,TLR8,KRT20,FAM3D
9_Member	GO Biological Processes	GO:1903532	positive regulation of secretion by cell	-2.61511	-0.883718	16/406	668,776,952,1392,3569,3624,6288,6348,6532,7447,8911,9447,10631,10874,51083,51311	FOXL2,CACNA1D,CD38,CRH,IL6,INHBA,SAA1,CCL3,SLC6A4,VSNL1,CACNA1I,AIM2,POSTN,NMU,GAL,TLR8
9_Member	GO Biological Processes	GO:0050708	regulation of protein secretion	-2.52515	-0.815641	18/492	152,776,952,1392,1803,2335,3569,6288,6348,6566,7447,9447,10631,10874,26525,51311,54474,131177	ADRA2C,CACNA1D,CD38,CRH,DPP4,FN1,IL6,SAA1,CCL3,SLC16A1,VSNL1,AIM2,POSTN,NMU,IL36RN,TLR8,KRT20,FAM3D
9_Member	GO Biological Processes	GO:0050796	regulation of insulin secretion	-2.06461	-0.695872	7/177	776,952,1392,1803,6566,7447,131177	CACNA1D,CD38,CRH,DPP4,SLC16A1,VSNL1,FAM3D
10_Summary	GO Biological Processes	GO:0030326	embryonic limb morphogenesis	-8.44109	-5.65925	11/127	2201,3226,3239,4920,5396,6423,6469,6926,26585,50515,56603,1311,3227,3229,341640,343637,7490,1515,3624,2619,3169,3294,3371,10481,6690,117154,135138,8091	FBN2,HOXC10,HOXD13,ROR2,PRRX1,SFRP2,SHH,TBX3,GREM1,CHST11,CYP26B1,COMP,HOXC11,HOXC13,FREM2,RSPO4,WT1,CTSV,INHBA,GAS1,FOXA1,HSD17B2,TNC,HOXB13,SPINK1,DACH2,PACRG,HMGA2
10_Member	GO Biological Processes	GO:0030326	embryonic limb morphogenesis	-8.44109	-5.65925	11/127	2201,3226,3239,4920,5396,6423,6469,6926,26585,50515,56603	FBN2,HOXC10,HOXD13,ROR2,PRRX1,SFRP2,SHH,TBX3,GREM1,CHST11,CYP26B1
10_Member	GO Biological Processes	GO:0035113	embryonic appendage morphogenesis	-8.44109	-5.65925	11/127	2201,3226,3239,4920,5396,6423,6469,6926,26585,50515,56603	FBN2,HOXC10,HOXD13,ROR2,PRRX1,SFRP2,SHH,TBX3,GREM1,CHST11,CYP26B1
10_Member	GO Biological Processes	GO:0035107	appendage morphogenesis	-7.68088	-5.07778	11/150	2201,3226,3239,4920,5396,6423,6469,6926,26585,50515,56603	FBN2,HOXC10,HOXD13,ROR2,PRRX1,SFRP2,SHH,TBX3,GREM1,CHST11,CYP26B1
10_Member	GO Biological Processes	GO:0035108	limb morphogenesis	-7.68088	-5.07778	11/150	2201,3226,3239,4920,5396,6423,6469,6926,26585,50515,56603	FBN2,HOXC10,HOXD13,ROR2,PRRX1,SFRP2,SHH,TBX3,GREM1,CHST11,CYP26B1
10_Member	GO Biological Processes	GO:0048736	appendage development	-6.87338	-4.26184	16/180	1311,2201,3226,3227,3229,3239,4920,5396,6423,6469,6926,26585,50515,56603,341640,343637	COMP,FBN2,HOXC10,HOXC11,HOXC13,HOXD13,ROR2,PRRX1,SFRP2,SHH,TBX3,GREM1,CHST11,CYP26B1,FREM2,RSPO4
10_Member	GO Biological Processes	GO:0060173	limb development	-6.87338	-4.26184	16/180	1311,2201,3226,3227,3229,3239,4920,5396,6423,6469,6926,26585,50515,56603,341640,343637	COMP,FBN2,HOXC10,HOXC11,HOXC13,HOXD13,ROR2,PRRX1,SFRP2,SHH,TBX3,GREM1,CHST11,CYP26B1,FREM2,RSPO4
10_Member	GO Biological Processes	GO:0030539	male genitalia development	-6.14775	-3.78289	5/23	3239,4920,6469,6926,7490	HOXD13,ROR2,SHH,TBX3,WT1
10_Member	GO Biological Processes	GO:0042733	embryonic digit morphogenesis	-5.16477	-2.96294	6/61	3239,4920,6423,6469,6926,50515	HOXD13,ROR2,SFRP2,SHH,TBX3,CHST11
10_Member	GO Biological Processes	GO:0048806	genitalia development	-4.55285	-2.44593	5/47	3239,4920,6469,6926,7490	HOXD13,ROR2,SHH,TBX3,WT1
10_Member	GO Biological Processes	GO:0046661	male sex differentiation	-4.50628	-2.41248	8/160	1515,3239,3624,4920,6423,6469,6926,7490	CTSV,HOXD13,INHBA,ROR2,SFRP2,SHH,TBX3,WT1
10_Member	GO Biological Processes	GO:0045165	cell fate commitment	-4.31507	-2.27927	10/274	2619,3169,3226,4920,5396,6423,6469,6926,7490,56603	GAS1,FOXA1,HOXC10,ROR2,PRRX1,SFRP2,SHH,TBX3,WT1,CYP26B1
10_Member	GO Biological Processes	GO:0048608	reproductive structure development	-3.85696	-1.94401	12/439	1515,3169,3239,3294,3371,3624,4920,6423,6469,6926,7490,10481	CTSV,FOXA1,HOXD13,HSD17B2,TNC,INHBA,ROR2,SFRP2,SHH,TBX3,WT1,HOXB13
10_Member	GO Biological Processes	GO:0061458	reproductive system development	-3.82043	-1.92457	12/443	1515,3169,3239,3294,3371,3624,4920,6423,6469,6926,7490,10481	CTSV,FOXA1,HOXD13,HSD17B2,TNC,INHBA,ROR2,SFRP2,SHH,TBX3,WT1,HOXB13
10_Member	GO Biological Processes	GO:0003006	developmental process involved in reproduction	-3.634	-1.78176	15/683	1515,3169,3239,3294,3371,3624,4920,6423,6469,6690,6926,7490,10481,117154,135138	CTSV,FOXA1,HOXD13,HSD17B2,TNC,INHBA,ROR2,SFRP2,SHH,SPINK1,TBX3,WT1,HOXB13,DACH2,PACRG
10_Member	GO Biological Processes	GO:0007548	sex differentiation	-3.62956	-1.78027	9/271	1515,3239,3624,4920,6423,6469,6926,7490,117154	CTSV,HOXD13,INHBA,ROR2,SFRP2,SHH,TBX3,WT1,DACH2
10_Member	GO Biological Processes	GO:0048333	mesodermal cell differentiation	-2.63039	-1.08725	3/35	3624,6423,8091	INHBA,SFRP2,HMGA2
10_Member	GO Biological Processes	GO:0048332	mesoderm morphogenesis	-2.55215	-1.04125	4/77	3624,6423,6926,8091	INHBA,SFRP2,TBX3,HMGA2
10_Member	GO Biological Processes	GO:0007498	mesoderm development	-2.44484	-0.961346	5/134	3624,6423,6469,6926,8091	INHBA,SFRP2,SHH,TBX3,HMGA2
10_Member	GO Biological Processes	GO:2000648	positive regulation of stem cell proliferation	-2.43297	-0.953967	3/41	6469,6926,8091	SHH,TBX3,HMGA2
10_Member	GO Biological Processes	GO:0060021	roof of mouth development	-2.30908	-0.867631	4/90	3624,5396,6469,6926	INHBA,PRRX1,SHH,TBX3
10_Member	GO Biological Processes	GO:2000241	regulation of reproductive process	-2.23826	-0.82224	5/150	3239,3624,6469,6690,7490	HOXD13,INHBA,SHH,SPINK1,WT1
10_Member	GO Biological Processes	GO:0009948	anterior/posterior axis specification	-2.21453	-0.803371	3/49	6469,6926,7490	SHH,TBX3,WT1
10_Member	GO Biological Processes	GO:0035282	segmentation	-2.16357	-0.771321	4/99	4920,6423,6926,7490	ROR2,SFRP2,TBX3,WT1
11_Summary	Reactome Gene Sets	R-HSA-6799990	Metal sequestration by antimicrobial proteins	-8.01144	-5.1837	5/6	3934,6278,6279,6280,338324,7780,3861,4499,4502,7054,1536,4688,10578,26525,387695,5266,6288,4241	LCN2,S100A7,S100A8,S100A9,S100A7A,SLC30A2,KRT14,MT1M,MT2A,TH,CYBB,NCF2,GNLY,IL36RN,C10orf99,PI3,SAA1,MELTF
11_Member	Reactome Gene Sets	R-HSA-6799990	Metal sequestration by antimicrobial proteins	-8.01144	-5.1837	5/6	3934,6278,6279,6280,338324	LCN2,S100A7,S100A8,S100A9,S100A7A
11_Member	GO Biological Processes	GO:0051238	sequestering of metal ion	-5.21258	-2.86195	5/16	3934,6278,6279,6280,7780	LCN2,S100A7,S100A8,S100A9,SLC30A2
11_Member	GO Biological Processes	GO:0010043	response to zinc ion	-4.15314	-2.15994	6/54	3861,4499,4502,6279,7054,7780	KRT14,MT1M,MT2A,S100A8,TH,SLC30A2
11_Member	GO Biological Processes	GO:0006882	cellular zinc ion homeostasis	-4.01157	-2.06538	5/36	4499,4502,6279,6280,7780	MT1M,MT2A,S100A8,S100A9,SLC30A2
11_Member	GO Biological Processes	GO:0032119	sequestering of zinc ion	-3.93525	-2.00175	3/8	6279,6280,7780	S100A8,S100A9,SLC30A2
11_Member	GO Biological Processes	GO:0055069	zinc ion homeostasis	-3.89648	-1.97182	5/38	4499,4502,6279,6280,7780	MT1M,MT2A,S100A8,S100A9,SLC30A2
11_Member	Reactome Gene Sets	R-HSA-5668599	RHO GTPases Activate NADPH Oxidases	-3.61554	-1.77212	4/24	1536,4688,6279,6280	CYBB,NCF2,S100A8,S100A9
11_Member	GO Biological Processes	GO:0050832	defense response to fungus	-3.23714	-1.32361	5/39	6279,6280,10578,26525,387695	S100A8,S100A9,GNLY,IL36RN,C10orf99
11_Member	Reactome Gene Sets	R-HSA-6803157	Antimicrobial peptides	-2.75956	-0.978274	7/98	3934,5266,6278,6279,6280,10578,338324	LCN2,PI3,S100A7,S100A8,S100A9,GNLY,S100A7A
11_Member	GO Biological Processes	GO:0009620	response to fungus	-2.66364	-0.914682	5/52	6279,6280,10578,26525,387695	S100A8,S100A9,GNLY,IL36RN,C10orf99
11_Member	Canonical Pathways	M264	PID TOLL ENDOGENOUS PATHWAY	-2.39277	-0.928669	3/25	6279,6280,6288	S100A8,S100A9,SAA1
11_Member	GO Biological Processes	GO:0055076	transition metal ion homeostasis	-2.11441	-0.73282	6/132	4241,4499,4502,6279,6280,7780	MELTF,MT1M,MT2A,S100A8,S100A9,SLC30A2
12_Summary	GO Biological Processes	GO:0030155	regulation of cell adhesion	-7.12807	-4.57239	29/716	1803,2335,3169,3371,3559,3569,3575,3620,3909,4241,6288,6366,6423,6469,7045,8728,10288,10551,10563,10631,11006,11326,26585,30835,57556,64600,80380,151887,340485,1805,2069,2172,2191,2919,3624,4920,5744,6424,9982,10178,10202,23213,135228,201501,51083,6279,6280,952,714,6318,6348,8877,60437	DPP4,FN1,FOXA1,TNC,IL2RA,IL6,IL7R,IDO1,LAMA3,MELTF,SAA1,CCL21,SFRP2,SHH,TGFBI,ADAM19,LILRB2,AGR2,CXCL13,POSTN,LILRB4,VSIG4,GREM1,CD209,SEMA6A,PLA2G2F,PDCD1LG2,CCDC80,ACER2,DPT,EREG,FABP6,FAP,CXCL1,INHBA,ROR2,PTHLH,SFRP4,FGFBP1,TENM1,DHRS2,SULF1,CD109,ZBTB7C,GAL,S100A8,S100A9,CD38,C1QC,SERPINB4,CCL3,SPHK1,CDH26
12_Member	GO Biological Processes	GO:0030155	regulation of cell adhesion	-7.12807	-4.57239	29/716	1803,2335,3169,3371,3559,3569,3575,3620,3909,4241,6288,6366,6423,6469,7045,8728,10288,10551,10563,10631,11006,11326,26585,30835,57556,64600,80380,151887,340485	DPP4,FN1,FOXA1,TNC,IL2RA,IL6,IL7R,IDO1,LAMA3,MELTF,SAA1,CCL21,SFRP2,SHH,TGFBI,ADAM19,LILRB2,AGR2,CXCL13,POSTN,LILRB4,VSIG4,GREM1,CD209,SEMA6A,PLA2G2F,PDCD1LG2,CCDC80,ACER2
12_Member	GO Biological Processes	GO:0045785	positive regulation of cell adhesion	-5.00735	-2.83126	18/416	1803,2335,3169,3559,3569,3575,6288,6366,6423,6469,8728,10288,10551,10563,11006,30835,80380,151887	DPP4,FN1,FOXA1,IL2RA,IL6,IL7R,SAA1,CCL21,SFRP2,SHH,ADAM19,LILRB2,AGR2,CXCL13,LILRB4,CD209,PDCD1LG2,CCDC80
12_Member	GO Biological Processes	GO:0070664	negative regulation of leukocyte proliferation	-4.9776	-2.80462	8/81	3559,3620,6469,10288,11326,26585,64600,80380	IL2RA,IDO1,SHH,LILRB2,VSIG4,GREM1,PLA2G2F,PDCD1LG2
12_Member	GO Biological Processes	GO:0042130	negative regulation of T cell proliferation	-4.85308	-2.71295	7/61	3559,3620,6469,10288,11326,64600,80380	IL2RA,IDO1,SHH,LILRB2,VSIG4,PLA2G2F,PDCD1LG2
12_Member	GO Biological Processes	GO:0008285	negative regulation of cell proliferation	-4.51727	-2.41827	25/773	1805,2069,2172,2191,2919,3559,3569,3620,3624,4920,5744,6423,6424,6469,9982,10178,10202,10288,11326,23213,26585,64600,80380,135228,201501	DPT,EREG,FABP6,FAP,CXCL1,IL2RA,IL6,IDO1,INHBA,ROR2,PTHLH,SFRP2,SFRP4,SHH,FGFBP1,TENM1,DHRS2,LILRB2,VSIG4,SULF1,GREM1,PLA2G2F,PDCD1LG2,CD109,ZBTB7C
12_Member	GO Biological Processes	GO:0007162	negative regulation of cell adhesion	-4.46577	-2.39497	14/294	3371,3559,3620,4241,6366,6469,7045,10288,10631,11326,57556,64600,80380,340485	TNC,IL2RA,IDO1,MELTF,CCL21,SHH,TGFBI,LILRB2,POSTN,VSIG4,SEMA6A,PLA2G2F,PDCD1LG2,ACER2
12_Member	GO Biological Processes	GO:0050672	negative regulation of lymphocyte proliferation	-4.2858	-2.11898	8/75	3559,3620,6469,10288,11326,51083,64600,80380	IL2RA,IDO1,SHH,LILRB2,VSIG4,GAL,PLA2G2F,PDCD1LG2
12_Member	GO Biological Processes	GO:0022409	positive regulation of cell-cell adhesion	-4.25221	-2.23195	13/269	1803,3169,3559,3569,3575,6366,6469,8728,10288,10563,11006,30835,80380	DPP4,FOXA1,IL2RA,IL6,IL7R,CCL21,SHH,ADAM19,LILRB2,CXCL13,LILRB4,CD209,PDCD1LG2
12_Member	GO Biological Processes	GO:0032945	negative regulation of mononuclear cell proliferation	-4.24413	-2.09234	8/76	3559,3620,6469,10288,11326,51083,64600,80380	IL2RA,IDO1,SHH,LILRB2,VSIG4,GAL,PLA2G2F,PDCD1LG2
12_Member	GO Biological Processes	GO:0007159	leukocyte cell-cell adhesion	-4.23349	-2.22188	15/349	1803,3559,3569,3575,3620,6279,6280,6366,6469,10288,11006,11326,30835,64600,80380	DPP4,IL2RA,IL6,IL7R,IDO1,S100A8,S100A9,CCL21,SHH,LILRB2,LILRB4,VSIG4,CD209,PLA2G2F,PDCD1LG2
12_Member	GO Biological Processes	GO:0022407	regulation of cell-cell adhesion	-3.84104	-1.93691	16/422	1803,3169,3559,3569,3575,3620,6366,6469,8728,10288,10563,11006,11326,30835,64600,80380	DPP4,FOXA1,IL2RA,IL6,IL7R,IDO1,CCL21,SHH,ADAM19,LILRB2,CXCL13,LILRB4,VSIG4,CD209,PLA2G2F,PDCD1LG2
12_Member	GO Biological Processes	GO:0070663	regulation of leukocyte proliferation	-3.71037	-1.83997	11/226	952,3559,3569,3620,6469,10288,11326,26585,30835,64600,80380	CD38,IL2RA,IL6,IDO1,SHH,LILRB2,VSIG4,GREM1,CD209,PLA2G2F,PDCD1LG2
12_Member	GO Biological Processes	GO:0002664	regulation of T cell tolerance induction	-3.61266	-1.77212	3/10	3559,3620,10288	IL2RA,IDO1,LILRB2
12_Member	GO Biological Processes	GO:0042129	regulation of T cell proliferation	-3.59128	-1.7598	9/160	3559,3569,3620,6469,10288,11326,30835,64600,80380	IL2RA,IL6,IDO1,SHH,LILRB2,VSIG4,CD209,PLA2G2F,PDCD1LG2
12_Member	GO Biological Processes	GO:1903037	regulation of leukocyte cell-cell adhesion	-3.57225	-1.75227	13/315	1803,3559,3569,3575,3620,6366,6469,10288,11006,11326,30835,64600,80380	DPP4,IL2RA,IL6,IL7R,IDO1,CCL21,SHH,LILRB2,LILRB4,VSIG4,CD209,PLA2G2F,PDCD1LG2
12_Member	GO Biological Processes	GO:0050863	regulation of T cell activation	-3.49364	-1.6942	13/321	1803,3559,3569,3575,3620,6366,6469,10288,11006,11326,30835,64600,80380	DPP4,IL2RA,IL6,IL7R,IDO1,CCL21,SHH,LILRB2,LILRB4,VSIG4,CD209,PLA2G2F,PDCD1LG2
12_Member	GO Biological Processes	GO:1903038	negative regulation of leukocyte cell-cell adhesion	-3.49005	-1.69208	8/131	3559,3620,6366,6469,10288,11326,64600,80380	IL2RA,IDO1,CCL21,SHH,LILRB2,VSIG4,PLA2G2F,PDCD1LG2
12_Member	GO Biological Processes	GO:0050870	positive regulation of T cell activation	-3.41354	-1.64098	10/206	1803,3559,3569,3575,6366,6469,10288,11006,30835,80380	DPP4,IL2RA,IL6,IL7R,CCL21,SHH,LILRB2,LILRB4,CD209,PDCD1LG2
12_Member	GO Biological Processes	GO:0002517	T cell tolerance induction	-3.35781	-1.61709	3/12	3559,3620,10288	IL2RA,IDO1,LILRB2
12_Member	GO Biological Processes	GO:0050670	regulation of lymphocyte proliferation	-3.33168	-1.60252	10/211	952,3559,3569,3620,6469,10288,11326,30835,64600,80380	CD38,IL2RA,IL6,IDO1,SHH,LILRB2,VSIG4,CD209,PLA2G2F,PDCD1LG2
12_Member	GO Biological Processes	GO:0032944	regulation of mononuclear cell proliferation	-3.29965	-1.58384	10/213	952,3559,3569,3620,6469,10288,11326,30835,64600,80380	CD38,IL2RA,IL6,IDO1,SHH,LILRB2,VSIG4,CD209,PLA2G2F,PDCD1LG2
12_Member	GO Biological Processes	GO:0002683	negative regulation of immune system process	-3.1942	-1.50856	16/483	714,1803,3559,3575,3620,3624,6318,6348,6366,6469,10288,11006,11326,26585,64600,80380	C1QC,DPP4,IL2RA,IL7R,IDO1,INHBA,SERPINB4,CCL3,CCL21,SHH,LILRB2,LILRB4,VSIG4,GREM1,PLA2G2F,PDCD1LG2
12_Member	GO Biological Processes	GO:0070661	leukocyte proliferation	-3.18158	-1.49755	12/303	952,3559,3569,3575,3620,6469,10288,11326,26585,30835,64600,80380	CD38,IL2RA,IL6,IL7R,IDO1,SHH,LILRB2,VSIG4,GREM1,CD209,PLA2G2F,PDCD1LG2
12_Member	GO Biological Processes	GO:0050868	negative regulation of T cell activation	-3.13269	-1.46357	7/114	3559,3620,6469,10288,11326,64600,80380	IL2RA,IDO1,SHH,LILRB2,VSIG4,PLA2G2F,PDCD1LG2
12_Member	GO Biological Processes	GO:1903039	positive regulation of leukocyte cell-cell adhesion	-3.10084	-1.43811	10/226	1803,3559,3569,3575,6366,6469,10288,11006,30835,80380	DPP4,IL2RA,IL6,IL7R,CCL21,SHH,LILRB2,LILRB4,CD209,PDCD1LG2
12_Member	GO Biological Processes	GO:0051250	negative regulation of lymphocyte activation	-3.09921	-1.43811	8/150	3559,3620,3624,6469,10288,11326,64600,80380	IL2RA,IDO1,INHBA,SHH,LILRB2,VSIG4,PLA2G2F,PDCD1LG2
12_Member	GO Biological Processes	GO:0042098	T cell proliferation	-3.06634	-1.41187	9/189	3559,3569,3620,6469,10288,11326,30835,64600,80380	IL2RA,IL6,IDO1,SHH,LILRB2,VSIG4,CD209,PLA2G2F,PDCD1LG2
12_Member	GO Biological Processes	GO:0046651	lymphocyte proliferation	-2.98331	-1.34545	11/276	952,3559,3569,3575,3620,6469,10288,11326,30835,64600,80380	CD38,IL2RA,IL6,IL7R,IDO1,SHH,LILRB2,VSIG4,CD209,PLA2G2F,PDCD1LG2
12_Member	GO Biological Processes	GO:0032943	mononuclear cell proliferation	-2.94552	-1.3219	11/279	952,3559,3569,3575,3620,6469,10288,11326,30835,64600,80380	CD38,IL2RA,IL6,IL7R,IDO1,SHH,LILRB2,VSIG4,CD209,PLA2G2F,PDCD1LG2
12_Member	GO Biological Processes	GO:0002643	regulation of tolerance induction	-2.88865	-1.27784	3/17	3559,3620,10288	IL2RA,IDO1,LILRB2
12_Member	GO Biological Processes	GO:0042102	positive regulation of T cell proliferation	-2.77262	-1.19387	6/97	3559,3569,6469,10288,30835,80380	IL2RA,IL6,SHH,LILRB2,CD209,PDCD1LG2
12_Member	GO Biological Processes	GO:0050671	positive regulation of lymphocyte proliferation	-2.76146	-1.1843	7/132	952,3559,3569,6469,10288,30835,80380	CD38,IL2RA,IL6,SHH,LILRB2,CD209,PDCD1LG2
12_Member	GO Biological Processes	GO:0032946	positive regulation of mononuclear cell proliferation	-2.74274	-1.17104	7/133	952,3559,3569,6469,10288,30835,80380	CD38,IL2RA,IL6,SHH,LILRB2,CD209,PDCD1LG2
12_Member	GO Biological Processes	GO:0002694	regulation of leukocyte activation	-2.7172	-1.15244	17/588	952,1803,3559,3569,3575,3620,3624,6348,6366,6469,8877,10288,11006,11326,30835,64600,80380	CD38,DPP4,IL2RA,IL6,IL7R,IDO1,INHBA,CCL3,CCL21,SHH,SPHK1,LILRB2,LILRB4,VSIG4,CD209,PLA2G2F,PDCD1LG2
12_Member	GO Biological Processes	GO:0002695	negative regulation of leukocyte activation	-2.61132	-1.07749	8/179	3559,3620,3624,6469,10288,11326,64600,80380	IL2RA,IDO1,INHBA,SHH,LILRB2,VSIG4,PLA2G2F,PDCD1LG2
12_Member	GO Biological Processes	GO:0051249	regulation of lymphocyte activation	-2.60099	-1.07076	15/501	952,1803,3559,3569,3575,3620,3624,6366,6469,10288,11006,11326,30835,64600,80380	CD38,DPP4,IL2RA,IL6,IL7R,IDO1,INHBA,CCL21,SHH,LILRB2,LILRB4,VSIG4,CD209,PLA2G2F,PDCD1LG2
12_Member	GO Biological Processes	GO:0070665	positive regulation of leukocyte proliferation	-2.59916	-1.0703	7/141	952,3559,3569,6469,10288,30835,80380	CD38,IL2RA,IL6,SHH,LILRB2,CD209,PDCD1LG2
12_Member	GO Biological Processes	GO:0022408	negative regulation of cell-cell adhesion	-2.55224	-1.04125	8/183	3559,3620,6366,6469,10288,11326,64600,80380	IL2RA,IDO1,CCL21,SHH,LILRB2,VSIG4,PLA2G2F,PDCD1LG2
12_Member	GO Biological Processes	GO:0042110	T cell activation	-2.42663	-0.949272	14/472	1803,3559,3569,3575,3620,6366,6469,10288,11006,11326,30835,60437,64600,80380	DPP4,IL2RA,IL6,IL7R,IDO1,CCL21,SHH,LILRB2,LILRB4,VSIG4,CD209,CDH26,PLA2G2F,PDCD1LG2
12_Member	GO Biological Processes	GO:0050865	regulation of cell activation	-2.39843	-0.929902	17/632	952,1803,3559,3569,3575,3620,3624,6348,6366,6469,8877,10288,11006,11326,30835,64600,80380	CD38,DPP4,IL2RA,IL6,IL7R,IDO1,INHBA,CCL3,CCL21,SHH,SPHK1,LILRB2,LILRB4,VSIG4,CD209,PLA2G2F,PDCD1LG2
12_Member	GO Biological Processes	GO:0002507	tolerance induction	-2.39277	-0.928669	3/25	3559,3620,10288	IL2RA,IDO1,LILRB2
12_Member	GO Biological Processes	GO:0050866	negative regulation of cell activation	-2.28108	-0.84776	8/203	3559,3620,3624,6469,10288,11326,64600,80380	IL2RA,IDO1,INHBA,SHH,LILRB2,VSIG4,PLA2G2F,PDCD1LG2
12_Member	GO Biological Processes	GO:0045582	positive regulation of T cell differentiation	-2.27494	-0.845204	5/86	3559,3575,6469,10288,11006	IL2RA,IL7R,SHH,LILRB2,LILRB4
12_Member	GO Biological Processes	GO:0002696	positive regulation of leukocyte activation	-2.26666	-0.839647	12/391	952,1803,3559,3569,3575,6348,6366,6469,10288,11006,30835,80380	CD38,DPP4,IL2RA,IL6,IL7R,CCL3,CCL21,SHH,LILRB2,LILRB4,CD209,PDCD1LG2
12_Member	GO Biological Processes	GO:0051251	positive regulation of lymphocyte activation	-2.23001	-0.815082	11/346	952,1803,3559,3569,3575,6366,6469,10288,11006,30835,80380	CD38,DPP4,IL2RA,IL6,IL7R,CCL21,SHH,LILRB2,LILRB4,CD209,PDCD1LG2
12_Member	GO Biological Processes	GO:0050867	positive regulation of cell activation	-2.14162	-0.752445	12/406	952,1803,3559,3569,3575,6348,6366,6469,10288,11006,30835,80380	CD38,DPP4,IL2RA,IL6,IL7R,CCL3,CCL21,SHH,LILRB2,LILRB4,CD209,PDCD1LG2
12_Member	GO Biological Processes	GO:0045589	regulation of regulatory T cell differentiation	-2.12666	-0.742051	3/31	3559,10288,11006	IL2RA,LILRB2,LILRB4
12_Member	GO Biological Processes	GO:0045621	positive regulation of lymphocyte differentiation	-2.05751	-0.690714	5/97	3559,3575,6469,10288,11006	IL2RA,IL7R,SHH,LILRB2,LILRB4
12_Member	GO Biological Processes	GO:0045066	regulatory T cell differentiation	-2.0148	-0.662779	3/34	3559,10288,11006	IL2RA,LILRB2,LILRB4
13_Summary	GO Biological Processes	GO:0061138	morphogenesis of a branching epithelium	-6.79465	-4.3378	11/183	2297,3169,3239,3371,6423,6469,6926,7490,10481,26585,284217,55959,2626,6928,10551,54658,255738,1116,3226,5396,2619,5744,4920	FOXD1,FOXA1,HOXD13,TNC,SFRP2,SHH,TBX3,WT1,HOXB13,GREM1,LAMA1,SULF2,GATA4,HNF1B,AGR2,UGT1A1,PCSK9,CHI3L1,HOXC10,PRRX1,GAS1,PTHLH,ROR2
13_Member	GO Biological Processes	GO:0061138	morphogenesis of a branching epithelium	-6.79465	-4.3378	11/183	2297,3169,3239,3371,6423,6469,6926,7490,10481,26585,284217	FOXD1,FOXA1,HOXD13,TNC,SFRP2,SHH,TBX3,WT1,HOXB13,GREM1,LAMA1
13_Member	GO Biological Processes	GO:0001763	morphogenesis of a branching structure	-6.42876	-4.02346	11/199	2297,3169,3239,3371,6423,6469,6926,7490,10481,26585,284217	FOXD1,FOXA1,HOXD13,TNC,SFRP2,SHH,TBX3,WT1,HOXB13,GREM1,LAMA1
13_Member	GO Biological Processes	GO:0060740	prostate gland epithelium morphogenesis	-5.86463	-3.54116	5/26	3169,3239,3371,6469,10481	FOXA1,HOXD13,TNC,SHH,HOXB13
13_Member	GO Biological Processes	GO:0060512	prostate gland morphogenesis	-5.6956	-3.40587	5/28	3169,3239,3371,6469,10481	FOXA1,HOXD13,TNC,SHH,HOXB13
13_Member	GO Biological Processes	GO:0048754	branching morphogenesis of an epithelial tube	-5.62616	-3.36775	9/151	2297,3169,3371,6423,6469,6926,7490,26585,284217	FOXD1,FOXA1,TNC,SFRP2,SHH,TBX3,WT1,GREM1,LAMA1
13_Member	GO Biological Processes	GO:0022612	gland morphogenesis	-5.3144	-3.09909	8/124	3169,3239,3371,6469,6926,10481,55959,284217	FOXA1,HOXD13,TNC,SHH,TBX3,HOXB13,SULF2,LAMA1
13_Member	GO Biological Processes	GO:0030850	prostate gland development	-4.46365	-2.39497	5/49	3169,3239,3371,6469,10481	FOXA1,HOXD13,TNC,SHH,HOXB13
13_Member	GO Biological Processes	GO:0060441	epithelial tube branching involved in lung morphogenesis	-4.18523	-2.18627	4/29	3169,3371,6469,284217	FOXA1,TNC,SHH,LAMA1
13_Member	GO Biological Processes	GO:0060525	prostate glandular acinus development	-4.17079	-2.1739	3/11	3169,3239,10481	FOXA1,HOXD13,HOXB13
13_Member	GO Biological Processes	GO:0003401	axis elongation	-4.12566	-2.14082	4/30	3239,3371,6423,6469	HOXD13,TNC,SFRP2,SHH
13_Member	GO Biological Processes	GO:0060442	branching involved in prostate gland morphogenesis	-4.04828	-2.089	3/12	3239,6469,10481	HOXD13,SHH,HOXB13
13_Member	GO Biological Processes	GO:0048546	digestive tract morphogenesis	-3.6263	-1.62941	6/50	2626,3239,6423,6469,6928,10551	GATA4,HOXD13,SFRP2,SHH,HNF1B,AGR2
13_Member	GO Biological Processes	GO:0060602	branch elongation of an epithelium	-3.52732	-1.55457	4/19	3239,3371,6469,6928	HOXD13,TNC,SHH,HNF1B
13_Member	GO Biological Processes	GO:0048732	gland development	-3.23664	-1.53454	11/442	3169,3239,3371,6469,6926,7490,10481,54658,55959,255738,284217	FOXA1,HOXD13,TNC,SHH,TBX3,WT1,HOXB13,UGT1A1,SULF2,PCSK9,LAMA1
13_Member	GO Biological Processes	GO:0060425	lung morphogenesis	-3.21952	-1.52464	4/51	3169,3371,6469,284217	FOXA1,TNC,SHH,LAMA1
13_Member	GO Biological Processes	GO:0060541	respiratory system development	-3.05516	-1.40406	7/201	1116,3169,3371,6469,7490,10551,284217	CHI3L1,FOXA1,TNC,SHH,WT1,AGR2,LAMA1
13_Member	GO Biological Processes	GO:0001708	cell fate specification	-3.00229	-1.35897	5/100	3169,3226,6423,6469,6926	FOXA1,HOXC10,SFRP2,SHH,TBX3
13_Member	GO Biological Processes	GO:0048663	neuron fate commitment	-2.7736	-1.19387	4/67	3169,3226,5396,6469	FOXA1,HOXC10,PRRX1,SHH
13_Member	GO Biological Processes	GO:0030324	lung development	-2.65427	-1.1038	6/175	1116,3169,3371,6469,10551,284217	CHI3L1,FOXA1,TNC,SHH,AGR2,LAMA1
13_Member	GO Biological Processes	GO:0030323	respiratory tube development	-2.60527	-1.07433	6/179	1116,3169,3371,6469,10551,284217	CHI3L1,FOXA1,TNC,SHH,AGR2,LAMA1
13_Member	GO Biological Processes	GO:0060428	lung epithelium development	-2.56069	-1.04262	3/37	3169,6469,10551	FOXA1,SHH,AGR2
13_Member	GO Biological Processes	GO:0071542	dopaminergic neuron differentiation	-2.56069	-1.04262	3/37	3169,6423,6469	FOXA1,SFRP2,SHH
13_Member	Canonical Pathways	M211	PID HEDGEHOG 2PATHWAY	-2.55449	-1.04125	3/22	2619,5744,6469	GAS1,PTHLH,SHH
13_Member	GO Biological Processes	GO:0045880	positive regulation of smoothened signaling pathway	-2.52738	-1.0204	3/38	3169,5396,6469	FOXA1,PRRX1,SHH
13_Member	GO Biological Processes	GO:0008589	regulation of smoothened signaling pathway	-2.37931	-0.918136	4/86	2619,3169,5396,6469	GAS1,FOXA1,PRRX1,SHH
13_Member	GO Biological Processes	GO:0007224	smoothened signaling pathway	-2.35096	-0.896367	5/141	2619,3169,4920,5396,6469	GAS1,FOXA1,ROR2,PRRX1,SHH
14_Summary	GO Biological Processes	GO:0022617	extracellular matrix disassembly	-6.64563	-4.20159	8/83	1515,1803,2191,4241,4318,5650,25818,84290,3569	CTSV,DPP4,FAP,MELTF,MMP9,KLK7,KLK5,CAPNS2,IL6
14_Member	GO Biological Processes	GO:0022617	extracellular matrix disassembly	-6.64563	-4.20159	8/83	1515,1803,2191,4241,4318,5650,25818,84290	CTSV,DPP4,FAP,MELTF,MMP9,KLK7,KLK5,CAPNS2
14_Member	GO Biological Processes	GO:0010715	regulation of extracellular matrix disassembly	-4.23416	-2.22188	4/17	1803,2191,3569,4241	DPP4,FAP,IL6,MELTF
14_Member	GO Biological Processes	GO:1903053	regulation of extracellular matrix organization	-2.67269	-1.11776	4/42	1803,2191,3569,4241	DPP4,FAP,IL6,MELTF
15_Summary	GO Biological Processes	GO:0001655	urogenital system development	-6.61105	-4.17275	14/330	2297,3169,3239,3371,4318,6469,7380,7490,8710,10481,26585,55959,56603,255738,2018,3227,3237,3248,6928,23213	FOXD1,FOXA1,HOXD13,TNC,MMP9,SHH,UPK3A,WT1,SERPINB7,HOXB13,GREM1,SULF2,CYP26B1,PCSK9,EMX2,HOXC11,HOXD11,HPGD,HNF1B,SULF1
15_Member	GO Biological Processes	GO:0001655	urogenital system development	-6.61105	-4.17275	14/330	2297,3169,3239,3371,4318,6469,7380,7490,8710,10481,26585,55959,56603,255738	FOXD1,FOXA1,HOXD13,TNC,MMP9,SHH,UPK3A,WT1,SERPINB7,HOXB13,GREM1,SULF2,CYP26B1,PCSK9
15_Member	GO Biological Processes	GO:0090183	regulation of kidney development	-5.38419	-3.1585	6/56	2297,4318,6469,7490,8710,26585	FOXD1,MMP9,SHH,WT1,SERPINB7,GREM1
15_Member	GO Biological Processes	GO:0090184	positive regulation of kidney development	-4.9018	-2.75296	5/40	2297,6469,7490,8710,26585	FOXD1,SHH,WT1,SERPINB7,GREM1
15_Member	GO Biological Processes	GO:0001822	kidney development	-4.19776	-2.19672	10/283	2297,4318,6469,7380,7490,8710,26585,55959,56603,255738	FOXD1,MMP9,SHH,UPK3A,WT1,SERPINB7,GREM1,SULF2,CYP26B1,PCSK9
15_Member	GO Biological Processes	GO:0072001	renal system development	-4.17172	-2.02871	16/292	2018,2297,3227,3237,3248,4318,6469,6928,7380,7490,8710,23213,26585,55959,56603,255738	EMX2,FOXD1,HOXC11,HOXD11,HPGD,MMP9,SHH,HNF1B,UPK3A,WT1,SERPINB7,SULF1,GREM1,SULF2,CYP26B1,PCSK9
15_Member	GO Biological Processes	GO:0090185	negative regulation of kidney development	-3.72702	-1.70895	4/17	4318,6469,6928,7490	MMP9,SHH,HNF1B,WT1
15_Member	GO Biological Processes	GO:0072074	kidney mesenchyme development	-3.42134	-1.64631	3/19	2297,6469,7490	FOXD1,SHH,WT1
15_Member	GO Biological Processes	GO:0001658	branching involved in ureteric bud morphogenesis	-3.23138	-1.32361	6/59	2297,3237,6469,6928,7490,26585	FOXD1,HOXD11,SHH,HNF1B,WT1,GREM1
15_Member	GO Biological Processes	GO:0072111	cell proliferation involved in kidney development	-3.22741	-1.52844	3/22	6469,7490,8710	SHH,WT1,SERPINB7
15_Member	GO Biological Processes	GO:0072006	nephron development	-3.21554	-1.52406	8/144	2297,3237,6469,6928,8710,23213,26585,55959	FOXD1,HOXD11,SHH,HNF1B,SERPINB7,SULF1,GREM1,SULF2
15_Member	GO Biological Processes	GO:0061005	cell differentiation involved in kidney development	-3.036	-1.38807	4/57	4318,6469,7490,26585	MMP9,SHH,WT1,GREM1
15_Member	GO Biological Processes	GO:0060675	ureteric bud morphogenesis	-3.00655	-1.1602	6/65	2297,3237,6469,6928,7490,26585	FOXD1,HOXD11,SHH,HNF1B,WT1,GREM1
15_Member	GO Biological Processes	GO:0072171	mesonephric tubule morphogenesis	-2.97155	-1.1438	6/66	2297,3237,6469,6928,7490,26585	FOXD1,HOXD11,SHH,HNF1B,WT1,GREM1
15_Member	GO Biological Processes	GO:0072078	nephron tubule morphogenesis	-2.74353	-0.968497	6/73	2297,3237,6469,6928,7490,26585	FOXD1,HOXD11,SHH,HNF1B,WT1,GREM1
15_Member	GO Biological Processes	GO:0072088	nephron epithelium morphogenesis	-2.68334	-0.924108	6/75	2297,3237,6469,6928,7490,26585	FOXD1,HOXD11,SHH,HNF1B,WT1,GREM1
15_Member	GO Biological Processes	GO:0061333	renal tubule morphogenesis	-2.62512	-0.886876	6/77	2297,3237,6469,6928,7490,26585	FOXD1,HOXD11,SHH,HNF1B,WT1,GREM1
15_Member	GO Biological Processes	GO:0072028	nephron morphogenesis	-2.62512	-0.886876	6/77	2297,3237,6469,6928,7490,26585	FOXD1,HOXD11,SHH,HNF1B,WT1,GREM1
15_Member	GO Biological Processes	GO:0060688	regulation of morphogenesis of a branching structure	-2.52124	-0.813854	5/56	3239,6469,6928,23213,26585	HOXD13,SHH,HNF1B,SULF1,GREM1
15_Member	GO Biological Processes	GO:0072210	metanephric nephron development	-2.46356	-0.975688	3/40	2297,7490,26585	FOXD1,WT1,GREM1
15_Member	GO Biological Processes	GO:0001656	metanephros development	-2.29209	-0.856574	4/91	2297,6469,7490,26585	FOXD1,SHH,WT1,GREM1
15_Member	GO Biological Processes	GO:0035850	epithelial cell differentiation involved in kidney development	-2.2652	-0.839304	3/47	4318,7490,26585	MMP9,WT1,GREM1
15_Member	GO Biological Processes	GO:0072080	nephron tubule development	-2.25875	-0.835068	4/93	2297,6469,7490,26585	FOXD1,SHH,WT1,GREM1
15_Member	GO Biological Processes	GO:0060993	kidney morphogenesis	-2.22624	-0.812932	4/95	2297,6469,7490,26585	FOXD1,SHH,WT1,GREM1
15_Member	GO Biological Processes	GO:0061326	renal tubule development	-2.22624	-0.812932	4/95	2297,6469,7490,26585	FOXD1,SHH,WT1,GREM1
15_Member	GO Biological Processes	GO:0001657	ureteric bud development	-2.17896	-0.778404	4/98	2297,6469,7490,26585	FOXD1,SHH,WT1,GREM1
15_Member	GO Biological Processes	GO:0072163	mesonephric epithelium development	-2.16357	-0.771321	4/99	2297,6469,7490,26585	FOXD1,SHH,WT1,GREM1
15_Member	GO Biological Processes	GO:0072164	mesonephric tubule development	-2.16357	-0.771321	4/99	2297,6469,7490,26585	FOXD1,SHH,WT1,GREM1
15_Member	GO Biological Processes	GO:0001823	mesonephros development	-2.10381	-0.724227	4/103	2297,6469,7490,26585	FOXD1,SHH,WT1,GREM1
15_Member	GO Biological Processes	GO:0072009	nephron epithelium development	-2.00559	-0.655904	4/110	2297,6469,7490,26585	FOXD1,SHH,WT1,GREM1
16_Summary	Reactome Gene Sets	R-HSA-211979	Eicosanoids	-6.57803	-4.14541	5/12	1580,8529,11283,66002,126410,130,1577,2326,2938,2946,4837,6822,54578,54658,56603,124975,241,2877,3248,55289,142827	CYP4B1,CYP4F2,CYP4F8,CYP4F12,CYP4F22,ADH6,CYP3A5,FMO1,GSTA1,GSTM2,NNMT,SULT2A1,UGT1A6,UGT1A1,CYP26B1,GGT6,ALOX5AP,GPX2,HPGD,ACOXL,ACSM6
16_Member	Reactome Gene Sets	R-HSA-211979	Eicosanoids	-6.57803	-4.14541	5/12	1580,8529,11283,66002,126410	CYP4B1,CYP4F2,CYP4F8,CYP4F12,CYP4F22
16_Member	Reactome Gene Sets	R-HSA-211935	Fatty acids	-6.01313	-3.66251	5/15	1580,8529,11283,66002,126410	CYP4B1,CYP4F2,CYP4F8,CYP4F12,CYP4F22
16_Member	Reactome Gene Sets	R-HSA-211859	Biological oxidations	-5.64998	-3.21169	16/222	130,1577,1580,2326,2938,2946,4837,6822,8529,11283,54578,54658,56603,66002,124975,126410	ADH6,CYP3A5,CYP4B1,FMO1,GSTA1,GSTM2,NNMT,SULT2A1,CYP4F2,CYP4F8,UGT1A6,UGT1A1,CYP26B1,CYP4F12,GGT6,CYP4F22
16_Member	Reactome Gene Sets	R-HSA-2142691	Synthesis of Leukotrienes (LT) and Eoxins (EX)	-5.20998	-3.00482	5/21	241,1580,8529,11283,126410	ALOX5AP,CYP4B1,CYP4F2,CYP4F8,CYP4F22
16_Member	Reactome Gene Sets	R-HSA-211897	Cytochrome P450 - arranged by substrate type	-4.9645	-2.80073	6/66	1577,1580,11283,56603,66002,126410	CYP3A5,CYP4B1,CYP4F8,CYP26B1,CYP4F12,CYP4F22
16_Member	Reactome Gene Sets	R-HSA-2142753	Arachidonic acid metabolism	-4.95025	-2.78951	7/59	241,1580,2877,3248,8529,11283,126410	ALOX5AP,CYP4B1,GPX2,HPGD,CYP4F2,CYP4F8,CYP4F22
16_Member	Reactome Gene Sets	R-HSA-211945	Phase I - Functionalization of compounds	-3.96572	-1.87706	9/106	130,1577,1580,2326,8529,11283,56603,66002,126410	ADH6,CYP3A5,CYP4B1,FMO1,CYP4F2,CYP4F8,CYP26B1,CYP4F12,CYP4F22
16_Member	Reactome Gene Sets	R-HSA-211958	Miscellaneous substrates	-3.35781	-1.61709	3/12	1580,8529,126410	CYP4B1,CYP4F2,CYP4F22
16_Member	Reactome Gene Sets	R-HSA-8978868	Fatty acid metabolism	-3.26998	-1.5594	9/177	241,1580,2877,3248,8529,11283,55289,126410,142827	ALOX5AP,CYP4B1,GPX2,HPGD,CYP4F2,CYP4F8,ACOXL,CYP4F22,ACSM6
16_Member	GO Biological Processes	GO:0006691	leukotriene metabolic process	-3.17516	-1.49354	4/31	241,8529,66002,124975	ALOX5AP,CYP4F2,CYP4F12,GGT6
[truncated: 32 more rows]

## Sheet: Table S6.
IMvigor 210 cohort clinical information and important gene set score
[truncated: 349 more rows]
